# Supplementary material for: Proteome-Wide Profiling Using Sample Multiplexing of a Human Cell Line Treated with Cannabidiol (CBD) and Tetrahydrocannabinol (THC)
Source: Proteomes. 2023 Nov 2;11(4):36. doi: 10.3390/proteomes11040036 (PMC10661330; doi:10.3390/proteomes11040036)
Supplement: Supplementary file 1 [file proteomes-11-00036-s001.zip]

Archive with 5 entries (5 files):
- Abyadeh at al Figure S1.pdf
- Abyadeh Table S3.xlsx
- Abyadeh Table S4.xlsx
- Abyadeh TableS1.xlsx
- Abyadeh TableS2.xlsx
