# Supplementary material for: Proteome-Wide Profiling Using Sample Multiplexing of a Human Cell Line Treated with Cannabidiol (CBD) and Tetrahydrocannabinol (THC)
Source: Proteomes. 2023 Nov 2;11(4):36. doi: 10.3390/proteomes11040036 (PMC10661330; doi:10.3390/proteomes11040036)
Supplement: Supplementary file 1 [file proteomes-11-00036-s001.zip › Abyadeh Table S3.xlsx]

## Sheet: DEPS-THC format
Table S3: Differentially expressed proteins for THC treatment. Columns include: Uniprot protein ID, gene name, protein description, the THC/MeOH ratio, and the associated p-value.
Protein ID	Gene Name	Description	THC/MeOH	p-value
sp|P12882|MYH1_HUMAN	MYH1	Myosin-1	0.16229	1.59873e-06
sp|P13196|HEM1_HUMAN	ALAS1	5-aminolevulinate synthase, nonspecific, mitochondrial	0.515256	0.000111317
sp|Q2QL34|MP17L_HUMAN	MPV17L	Mpv17-like protein	0.534096	0.0396663
sp|P40855|PEX19_HUMAN	PEX19	Peroxisomal biogenesis factor 19	0.551249	1.24576e-06
sp|Q8IXM3|RM41_HUMAN	MRPL41	39S ribosomal protein L41, mitochondrial	0.573012	3.43629e-06
sp|Q9NR71|ASAH2_HUMAN	ASAH2	Neutral ceramidase	0.574178	0.025799
sp|P25391|LAMA1_HUMAN	LAMA1	Laminin subunit alpha-1	0.575193	0.00138862
sp|Q9BTM9-2|URM1_HUMAN	URM1	Isoform 2 of Ubiquitin-related modifier 1	0.575359	0.00638896
sp|Q15678|PTN14_HUMAN	PTPN14	Tyrosine-protein phosphatase non-receptor type 14	0.581965	0.0233868
sp|Q8TCT0|CERK1_HUMAN	CERK	Ceramide kinase	0.608841	0.00841331
sp|O14561|ACPM_HUMAN	NDUFAB1	Acyl carrier protein, mitochondrial	0.619266	1.26132e-05
sp|Q13015|AF1Q_HUMAN	MLLT11	Protein AF1q	0.622525	0.000581883
sp|Q12860|CNTN1_HUMAN	CNTN1	Contactin-1	0.651159	0.000553587
sp|Q86WW8|COA5_HUMAN	COA5	Cytochrome c oxidase assembly factor 5	0.656828	0.000555536
sp|Q9BRT3|MIEN1_HUMAN	MIEN1	Migration and invasion enhancer 1	0.657496	0.000382555
sp|Q13449|LSAMP_HUMAN	LSAMP	Limbic system-associated membrane protein	0.662114	0.00010574
sp|Q8TCZ2-5|C99L2_HUMAN	CD99L2	Isoform 5 of CD99 antigen-like protein 2	0.664392	0.00720742
sp|P79522|PRR3_HUMAN	PRR3	Proline-rich protein 3	0.666724	2.78344e-06
sp|Q96K80|ZC3HA_HUMAN	ZC3H10	Zinc finger CCCH domain-containing protein 10	0.667262	0.0393254
sp|Q15637-2|SF01_HUMAN	SF1	Isoform 2 of Splicing factor 1	0.680556	0.000507
sp|O95857|TSN13_HUMAN	TSPAN13	Tetraspanin-13	0.684158	0.000626852
sp|Q02246|CNTN2_HUMAN	CNTN2	Contactin-2	0.684397	0.000881246
sp|Q96A54|PAQR1_HUMAN	ADIPOR1	Adiponectin receptor protein 1	0.685342	0.0469853
sp|Q9NQZ6|ZC4H2_HUMAN	ZC4H2	Zinc finger C4H2 domain-containing protein	0.69783	0.000127194
sp|Q8WVX9|FACR1_HUMAN	FAR1	Fatty acyl-CoA reductase 1	0.708261	1.11562e-05
sp|Q96PD2-2|DCBD2_HUMAN	DCBLD2	Isoform 2 of Discoidin, CUB and LCCL domain-containing protein 2	0.718218	0.015852
sp|Q8TES7-6|FBF1_HUMAN	FBF1	Isoform 6 of Fas-binding factor 1	0.718223	0.00510187
sp|Q9NZE8|RM35_HUMAN	MRPL35	39S ribosomal protein L35, mitochondrial	0.720272	6.34023e-06
sp|Q96GV9|CE030_HUMAN	C5orf30	UNC119-binding protein C5orf30	0.728021	9.64511e-05
sp|P15954|COX7C_HUMAN	COX7C	Cytochrome c oxidase subunit 7C, mitochondrial	0.728112	9.95967e-05
sp|Q9NQX5|NPDC1_HUMAN	NPDC1	Neural proliferation differentiation and control protein 1	0.737562	0.00268077
sp|Q9H8J5|MANS1_HUMAN	MANSC1	MANSC domain-containing protein 1	0.738497	0.0122852
sp|O14867|BACH1_HUMAN	BACH1	Transcription regulator protein BACH1	0.739181	0.0012077
sp|O43182|RHG06_HUMAN	ARHGAP6	Rho GTPase-activating protein 6	0.74107	0.0161182
sp|Q9BPZ3|PAIP2_HUMAN	PAIP2	Polyadenylate-binding protein-interacting protein 2	0.742291	0.00104525
sp|Q8N3F0|MTURN_HUMAN	MTURN	Maturin	0.744418	0.00312331
sp|Q9P0R6|GSKIP_HUMAN	GSKIP	GSK3B-interacting protein	0.745222	0.00164557
sp|P04003|C4BPA_HUMAN	C4BPA	C4b-binding protein alpha chain	0.745321	0.000393777
sp|Q96EP9|NTCP4_HUMAN	SLC10A4	Sodium/bile acid cotransporter 4	0.747177	0.00066229
sp|Q9H7P9|PKHG2_HUMAN	PLEKHG2	Pleckstrin homology domain-containing family G member 2	0.748087	0.000838984
sp|O43805|SSNA1_HUMAN	SSNA1	Sjoegren syndrome nuclear autoantigen 1	0.748383	0.000533299
sp|Q9P2D6|F135A_HUMAN	FAM135A	Protein FAM135A	0.751923	0.0364721
sp|Q8IVP5|FUND1_HUMAN	FUNDC1	FUN14 domain-containing protein 1	0.758758	0.00168819
sp|P06732|KCRM_HUMAN	CKM	Creatine kinase M-type	0.764403	0.000541437
sp|Q969M1|TM40L_HUMAN	TOMM40L	Mitochondrial import receptor subunit TOM40B	0.764645	0.0117739
sp|P98155|VLDLR_HUMAN	VLDLR	Very low-density lipoprotein receptor	0.765041	0.0387831
sp|Q02487|DSC2_HUMAN	DSC2	Desmocollin-2	0.767807	0.00468957
sp|Q6UUV9-2|CRTC1_HUMAN	CRTC1	Isoform 2 of CREB-regulated transcription coactivator 1	0.768179	0.000483034
sp|Q14244-7|MAP7_HUMAN	MAP7	Isoform 7 of Ensconsin	0.769173	1.36463e-05
sp|Q9UPZ6|THS7A_HUMAN	THSD7A	Thrombospondin type-1 domain-containing protein 7A	0.769789	2.01578e-06
sp|P58546|MTPN_HUMAN	MTPN	Myotrophin	0.771814	2.50896e-05
sp|Q96GX2|A7L3B_HUMAN	ATXN7L3B	Ataxin-7-like protein 3B	0.772562	0.00238516
sp|Q8WUW1-2|BRK1_HUMAN	BRK1	Isoform 2 of Protein BRICK1	0.773856	0.000505224
sp|Q12852-2|M3K12_HUMAN	MAP3K12	Isoform 2 of Mitogen-activated protein kinase kinase kinase 12	0.774082	0.0239824
sp|Q6PII3|CC174_HUMAN	CCDC174	Coiled-coil domain-containing protein 174	0.774455	0.000119773
sp|Q96B23|CR025_HUMAN	C18orf25	Uncharacterized protein C18orf25	0.774494	0.000139356
sp|Q569H4|LARGN_HUMAN	PRR16	Protein Largen	0.778729	9.27957e-05
sp|O75607|NPM3_HUMAN	NPM3	Nucleoplasmin-3	0.778873	0.00037257
sp|P35318|ADML_HUMAN	ADM	ADM	0.779872	0.00769038
sp|Q9P273|TEN3_HUMAN	TENM3	Teneurin-3	0.780776	0.00517857
sp|P05060|SCG1_HUMAN	CHGB	Secretogranin-1	0.781204	1.82674e-05
sp|O15417|TNC18_HUMAN	TNRC18	Trinucleotide repeat-containing gene 18 protein	0.781423	0.00340755
sp|P10645|CMGA_HUMAN	CHGA	Chromogranin-A	0.782326	0.000623266
sp|Q96M89|CC138_HUMAN	CCDC138	Coiled-coil domain-containing protein 138	0.782976	0.0474341
sp|Q05084|ICA69_HUMAN	ICA1	Islet cell autoantigen 1	0.783097	8.11344e-05
sp|Q9BV35-3|SCMC3_HUMAN	SLC25A23	Isoform 3 of Calcium-binding mitochondrial carrier protein SCaMC-3	0.783533	0.00211746
sp|Q9NWQ4|GPT2L_HUMAN	GPATCH2L	G patch domain-containing protein 2-like	0.78834	0.00486425
sp|Q9HD47|MOG1_HUMAN	RANGRF	Ran guanine nucleotide release factor	0.788769	0.0275889
sp|O75531|BAF_HUMAN	BANF1	Barrier-to-autointegration factor	0.789714	0.000185986
tr|K7EMX1|K7EMX1_HUMAN	SPC24	Kinetochore protein Spc24 (Fragment)	0.789735	5.3376e-05
sp|P69905|HBA_HUMAN	HBA1	Hemoglobin subunit alpha	0.789876	0.0120468
sp|P00414|COX3_HUMAN	MT-CO3	Cytochrome c oxidase subunit 3	0.79287	0.0043616
sp|Q5HYW3|RTL5_HUMAN	RTL5	Retrotransposon Gag-like protein 5	0.794848	0.00212561
sp|Q9Y5J9|TIM8B_HUMAN	TIMM8B	Mitochondrial import inner membrane translocase subunit Tim8 B	0.796414	0.026624
sp|Q96FH0|BORC8_HUMAN	BORCS8	BLOC-1-related complex subunit 8	0.799087	0.00185053
sp|Q8WUF5|IASPP_HUMAN	PPP1R13L	RelA-associated inhibitor	0.800778	0.00397152
sp|P23975-2|SC6A2_HUMAN	SLC6A2	Isoform 2 of Sodium-dependent noradrenaline transporter	0.801988	0.00222232
sp|O60220|TIM8A_HUMAN	TIMM8A	Mitochondrial import inner membrane translocase subunit Tim8 A	0.803291	0.00563769
sp|Q96NJ6|ZFP3_HUMAN	ZFP3	Zinc finger protein 3 homolog	0.804884	0.00921824
sp|Q9BTT4|MED10_HUMAN	MED10	Mediator of RNA polymerase II transcription subunit 10	0.805162	0.00121662
sp|Q9NXR5|ANR10_HUMAN	ANKRD10	Ankyrin repeat domain-containing protein 10	0.805642	0.0123494
sp|P22466|GALA_HUMAN	GAL	Galanin peptides	0.807649	0.000701796
sp|Q8N729|NPW_HUMAN	NPW	Neuropeptide W	0.80912	0.00567268
sp|Q6NSJ2|PHLB3_HUMAN	PHLDB3	Pleckstrin homology-like domain family B member 3	0.810841	0.0495759
sp|P43121|MUC18_HUMAN	MCAM	Cell surface glycoprotein MUC18	0.811697	0.000118044
sp|Q9NT99|LRC4B_HUMAN	LRRC4B	Leucine-rich repeat-containing protein 4B	0.812101	0.00440619
sp|P14406|CX7A2_HUMAN	COX7A2	Cytochrome c oxidase subunit 7A2, mitochondrial	0.812439	0.00129041
sp|Q13503|MED21_HUMAN	MED21	Mediator of RNA polymerase II transcription subunit 21	0.813613	0.0495575
sp|Q6EMK4|VASN_HUMAN	VASN	Vasorin	0.815928	3.76282e-05
sp|O43766|LIAS_HUMAN	LIAS	Lipoyl synthase, mitochondrial	0.816484	0.0234458
sp|Q15758|AAAT_HUMAN	SLC1A5	Neutral amino acid transporter B(0)	0.816686	0.00174566
sp|P30305|MPIP2_HUMAN	CDC25B	M-phase inducer phosphatase 2	0.817105	0.000582703
sp|Q53ET0|CRTC2_HUMAN	CRTC2	CREB-regulated transcription coactivator 2	0.817569	0.00118287
sp|Q9ULF5|S39AA_HUMAN	SLC39A10	Zinc transporter ZIP10	0.817749	0.000659902
sp|Q9UKB3|DJC12_HUMAN	DNAJC12	DnaJ homolog subfamily C member 12	0.818483	0.000480826
sp|Q9HD64|XAGE1_HUMAN	XAGE1A	X antigen family member 1	0.818817	0.0405993
sp|Q9H4K7|MTG2_HUMAN	MTG2	Mitochondrial ribosome-associated GTPase 2	0.818984	0.000884208
sp|Q96DE9|CX04B_HUMAN	CXorf40B	Protein CXorf40B	0.819371	0.0128511
sp|Q15012|LAP4A_HUMAN	LAPTM4A	Lysosomal-associated transmembrane protein 4A	0.821573	0.0402111
sp|Q4KMQ1|TPRN_HUMAN	TPRN	Taperin	0.821845	0.000304966
sp|Q9H3Q1|BORG4_HUMAN	CDC42EP4	Cdc42 effector protein 4	0.822837	0.000279214
sp|Q7Z7J7|LHPL4_HUMAN	LHFPL4	LHFPL tetraspan subfamily member 4 protein	0.823748	0.0251897
sp|Q9Y244|POMP_HUMAN	POMP	Proteasome maturation protein	0.824013	0.0027881
sp|Q9BRU2|TCAL7_HUMAN	TCEAL7	Transcription elongation factor A protein-like 7	0.824438	0.00516182
sp|Q8WX77|IBPL1_HUMAN	IGFBPL1	Insulin-like growth factor-binding protein-like 1	0.825495	0.00138483
sp|P13378|HXD8_HUMAN	HOXD8	Homeobox protein Hox-D8	0.82604	0.0165352
sp|Q8N6N7|ACBD7_HUMAN	ACBD7	Acyl-CoA-binding domain-containing protein 7	0.827756	0.00705615
sp|Q8TF71|MOT10_HUMAN	SLC16A10	Monocarboxylate transporter 10	0.830389	5.57539e-05
sp|Q6UX72|B3GN9_HUMAN	B3GNT9	UDP-GlcNAc:betaGal beta-1,3-N-acetylglucosaminyltransferase 9	1.20015	0.0128942
sp|P62341|SELT_HUMAN	SELENOT	Thioredoxin reductase-like selenoprotein T	1.20047	0.00215824
sp|Q8WU17|RN139_HUMAN	RNF139	E3 ubiquitin-protein ligase RNF139	1.2008	0.0379112
sp|P37173-2|TGFR2_HUMAN	TGFBR2	Isoform 2 of TGF-beta receptor type-2	1.20119	0.045672
sp|Q969U7|PSMG2_HUMAN	PSMG2	Proteasome assembly chaperone 2	1.20161	2.81593e-05
sp|Q8IYK4|GT252_HUMAN	COLGALT2	Procollagen galactosyltransferase 2	1.20183	0.00205633
sp|Q9BV94|EDEM2_HUMAN	EDEM2	ER degradation-enhancing alpha-mannosidase-like protein 2	1.20192	0.0323237
sp|Q9UBU6|FA8A1_HUMAN	FAM8A1	Protein FAM8A1	1.20238	0.00150566
sp|Q9GZX9|TWSG1_HUMAN	TWSG1	Twisted gastrulation protein homolog 1	1.2033	0.0111382
sp|Q96AG4|LRC59_HUMAN	LRRC59	Leucine-rich repeat-containing protein 59	1.20335	6.50043e-05
sp|P10643|CO7_HUMAN	C7	Complement component C7	1.20488	4.66216e-05
sp|A0AV96|RBM47_HUMAN	RBM47	RNA-binding protein 47	1.20544	0.0336838
sp|Q9Y385|UB2J1_HUMAN	UBE2J1	Ubiquitin-conjugating enzyme E2 J1	1.20566	0.000889955
sp|Q9NZS9|BFAR_HUMAN	BFAR	Bifunctional apoptosis regulator	1.20567	0.0120864
sp|O95070|YIF1A_HUMAN	YIF1A	Protein YIF1A	1.20572	0.000613875
sp|P10412|H14_HUMAN	H1-4	Histone H1.4	1.20695	0.00314806
sp|O00567|NOP56_HUMAN	NOP56	Nucleolar protein 56	1.20708	9.63843e-06
sp|P02794|FRIH_HUMAN	FTH1	Ferritin heavy chain	1.20711	6.25474e-05
sp|P40429|RL13A_HUMAN	RPL13A	60S ribosomal protein L13a	1.2079	0.000858241
sp|Q5BJD5|TM41B_HUMAN	TMEM41B	Transmembrane protein 41B	1.20834	0.0117802
sp|O75635|SPB7_HUMAN	SERPINB7	Serpin B7	1.20882	0.000905977
sp|P18859-2|ATP5J_HUMAN	ATP5PF	Isoform 2 of ATP synthase-coupling factor 6, mitochondrial	1.20909	0.00621224
sp|O75865-2|TPC6A_HUMAN	TRAPPC6A	Isoform 2 of Trafficking protein particle complex subunit 6A	1.20985	0.0494594
sp|Q03518|TAP1_HUMAN	TAP1	Antigen peptide transporter 1	1.21023	0.0401244
sp|Q6DKI1|RL7L_HUMAN	RPL7L1	60S ribosomal protein L7-like 1	1.21074	0.000436388
sp|Q9NWH2|TM242_HUMAN	TMEM242	Transmembrane protein 242	1.2116	0.0240937
sp|O96005|CLPT1_HUMAN	CLPTM1	Cleft lip and palate transmembrane protein 1	1.21211	0.000150978
sp|Q99941|ATF6B_HUMAN	ATF6B	Cyclic AMP-dependent transcription factor ATF-6 beta	1.2124	0.0110317
sp|P36955|PEDF_HUMAN	SERPINF1	Pigment epithelium-derived factor	1.21247	0.0150007
sp|Q5TGZ0|MIC10_HUMAN	MICOS10	MICOS complex subunit MIC10	1.21589	0.000836204
sp|P36406|TRI23_HUMAN	TRIM23	E3 ubiquitin-protein ligase TRIM23	1.21628	0.0347999
sp|Q15629|TRAM1_HUMAN	TRAM1	Translocating chain-associated membrane protein 1	1.21717	0.0153956
sp|P26358|DNMT1_HUMAN	DNMT1	DNA (cytosine-5)-methyltransferase 1	1.21925	0.00680549
sp|P84243|H33_HUMAN	H3-3A	Histone H3.3	1.21931	0.00600487
sp|Q70UQ0|IKIP_HUMAN	IKBIP	Inhibitor of nuclear factor kappa-B kinase-interacting protein	1.21941	0.002775
sp|P61254|RL26_HUMAN	RPL26	60S ribosomal protein L26	1.22147	0.00264111
tr|J3KQL8|J3KQL8_HUMAN	APOL2	Apolipoprotein L2	1.223	0.015084
sp|Q9Y5U4|INSI2_HUMAN	INSIG2	Insulin-induced gene 2 protein	1.22329	0.00254219
sp|O00458|IFRD1_HUMAN	IFRD1	Interferon-related developmental regulator 1	1.22354	0.00346907
sp|Q9C0H2-4|TTYH3_HUMAN	TTYH3	Isoform 4 of Protein tweety homolog 3	1.22368	0.000534949
sp|Q9Y5R8|TPPC1_HUMAN	TRAPPC1	Trafficking protein particle complex subunit 1	1.22405	0.000114828
sp|O43490|PROM1_HUMAN	PROM1	Prominin-1	1.22407	0.0278406
sp|Q96D15|RCN3_HUMAN	RCN3	Reticulocalbin-3	1.22487	0.00093575
sp|O43692|PI15_HUMAN	PI15	Peptidase inhibitor 15	1.22637	0.0267839
sp|O60858-3|TRI13_HUMAN	TRIM13	Isoform 3 of E3 ubiquitin-protein ligase TRIM13	1.22662	0.000254158
sp|Q53FV1|ORML2_HUMAN	ORMDL2	ORM1-like protein 2	1.22677	0.0394325
sp|Q70SY1|CR3L2_HUMAN	CREB3L2	Cyclic AMP-responsive element-binding protein 3-like protein 2	1.22811	0.00311713
sp|P37268|FDFT_HUMAN	FDFT1	Squalene synthase	1.23084	0.0255982
sp|Q05469|LIPS_HUMAN	LIPE	Hormone-sensitive lipase	1.23145	0.000115343
sp|O43768-3|ENSA_HUMAN	ENSA	Isoform 3 of Alpha-endosulfine	1.23351	7.79867e-06
sp|Q96LJ7|DHRS1_HUMAN	DHRS1	Dehydrogenase/reductase SDR family member 1	1.23544	0.0274931
sp|Q86TM6|SYVN1_HUMAN	SYVN1	E3 ubiquitin-protein ligase synoviolin	1.23552	0.00161899
sp|Q6NUQ4|TM214_HUMAN	TMEM214	Transmembrane protein 214	1.23569	0.001693
sp|Q02388|CO7A1_HUMAN	COL7A1	Collagen alpha-1(VII) chain	1.23896	0.0362056
sp|Q99504|EYA3_HUMAN	EYA3	Eyes absent homolog 3	1.2444	0.00115989
sp|Q9BY50|SC11C_HUMAN	SEC11C	Signal peptidase complex catalytic subunit SEC11C	1.24468	0.0267993
sp|Q8IUR0|TPPC5_HUMAN	TRAPPC5	Trafficking protein particle complex subunit 5	1.24557	0.000947673
sp|P10588|NR2F6_HUMAN	NR2F6	Nuclear receptor subfamily 2 group F member 6	1.24646	0.000476127
sp|Q86WK9|PAQR7_HUMAN	PAQR7	Membrane progestin receptor alpha	1.24984	0.00103739
sp|Q8NDC0|MISSL_HUMAN	MAPK1IP1L	MAPK-interacting and spindle-stabilizing protein-like	1.25085	0.00347364
sp|Q8NCR0|B3GL2_HUMAN	B3GALNT2	UDP-GalNAc:beta-1,3-N-acetylgalactosaminyltransferase 2	1.25293	0.034459
sp|Q9H173|SIL1_HUMAN	SIL1	Nucleotide exchange factor SIL1	1.25514	2.28603e-06
sp|P28845|DHI1_HUMAN	HSD11B1	Corticosteroid 11-beta-dehydrogenase isozyme 1	1.25785	0.00238082
sp|Q9H1E3|NUCKS_HUMAN	NUCKS1	Nuclear ubiquitous casein and cyclin-dependent kinase substrate 1	1.2594	4.91183e-05
sp|P00338-3|LDHA_HUMAN	LDHA	Isoform 3 of L-lactate dehydrogenase A chain	1.26254	0.00142657
sp|P46937-9|YAP1_HUMAN	YAP1	Isoform 9 of Transcriptional coactivator YAP1	1.26275	0.0308733
sp|Q8N475|FSTL5_HUMAN	FSTL5	Follistatin-related protein 5	1.26434	0.0255718
sp|O00712-4|NFIB_HUMAN	NFIB	Isoform 4 of Nuclear factor 1 B-type	1.26603	0.000389123
sp|P62805|H4_HUMAN	H4C1	Histone H4	1.2666	3.23694e-06
sp|Q12770|SCAP_HUMAN	SCAP	Sterol regulatory element-binding protein cleavage-activating protein	1.26829	0.000431183
sp|Q9UMX5|NENF_HUMAN	NENF	Neudesin	1.26838	0.000173068
sp|P52799|EFNB2_HUMAN	EFNB2	Ephrin-B2	1.26956	0.00098609
sp|Q9BZJ4|S2539_HUMAN	SLC25A39	Solute carrier family 25 member 39	1.27056	0.0363148
sp|O60909-3|B4GT2_HUMAN	B4GALT2	Isoform 3 of Beta-1,4-galactosyltransferase 2	1.27178	0.0271005
sp|Q9Y324|FCF1_HUMAN	FCF1	rRNA-processing protein FCF1 homolog	1.27259	0.000302763
sp|Q96I23|PREY_HUMAN	PYURF	Protein preY, mitochondrial	1.27305	0.00425718
sp|P07108-5|ACBP_HUMAN	DBI	Isoform 5 of Acyl-CoA-binding protein	1.2778	0.00206347
sp|Q13057-2|COASY_HUMAN	COASY	Isoform 2 of Bifunctional coenzyme A synthase	1.27995	0.000621188
sp|P02795|MT2_HUMAN	MT2A	Metallothionein-2	1.28251	0.0222038
sp|Q9UBV2|SE1L1_HUMAN	SEL1L	Protein sel-1 homolog 1	1.28255	0.000241568
sp|Q9UK76|JUPI1_HUMAN	JPT1	Jupiter microtubule associated homolog 1	1.28386	2.19922e-05
sp|Q96AD5|PLPL2_HUMAN	PNPLA2	Patatin-like phospholipase domain-containing protein 2	1.28674	0.000146761
sp|Q9BVT8|TMUB1_HUMAN	TMUB1	Transmembrane and ubiquitin-like domain-containing protein 1	1.29261	0.00240573
sp|P06454|PTMA_HUMAN	PTMA	Prothymosin alpha	1.29706	0.000252065
sp|Q9NR31|SAR1A_HUMAN	SAR1A	GTP-binding protein SAR1a	1.29865	0.00070653
sp|O14810|CPLX1_HUMAN	CPLX1	Complexin-1	1.29898	0.00291244
sp|Q99574|NEUS_HUMAN	SERPINI1	Neuroserpin	1.3003	0.0185345
sp|Q92626|PXDN_HUMAN	PXDN	Peroxidasin homolog	1.30261	9.00286e-06
sp|Q9ULZ3|ASC_HUMAN	PYCARD	Apoptosis-associated speck-like protein containing a CARD	1.30849	0.00139363
sp|Q71RG4|TMUB2_HUMAN	TMUB2	Transmembrane and ubiquitin-like domain-containing protein 2	1.30864	0.000697962
sp|Q9BX73|TM2D2_HUMAN	TM2D2	TM2 domain-containing protein 2	1.30964	0.000973631
sp|P09601|HMOX1_HUMAN	HMOX1	Heme oxygenase 1	1.31028	0.0387263
sp|Q9Y3E0|GOT1B_HUMAN	GOLT1B	Vesicle transport protein GOT1B	1.31126	6.67648e-05
sp|Q13438|OS9_HUMAN	OS9	Protein OS-9	1.32076	8.25442e-05
sp|Q9NV64|TM39A_HUMAN	TMEM39A	Transmembrane protein 39A	1.34276	0.00538965
sp|Q8N1Q1|CAH13_HUMAN	CA13	Carbonic anhydrase 13	1.34701	0.0256356
sp|Q9BQI3|E2AK1_HUMAN	EIF2AK1	Eukaryotic translation initiation factor 2-alpha kinase 1	1.3638	0.000171389
sp|Q8TEZ7|PAQR8_HUMAN	PAQR8	Membrane progestin receptor beta	1.36504	0.0013098
sp|P38571|LICH_HUMAN	LIPA	Lysosomal acid lipase/cholesteryl ester hydrolase	1.36551	0.00604696
sp|P04035-3|HMDH_HUMAN	HMGCR	Isoform 3 of 3-hydroxy-3-methylglutaryl-coenzyme A reductase	1.37037	0.00145783
sp|P02792|FRIL_HUMAN	FTL	Ferritin light chain	1.38034	9.12603e-06
sp|Q8NCS4|TM35B_HUMAN	TMEM35B	Transmembrane protein 35B	1.38207	0.0004668
sp|P30533|AMRP_HUMAN	LRPAP1	Alpha-2-macroglobulin receptor-associated protein	1.40021	7.66331e-05
sp|Q96A72|MGN2_HUMAN	MAGOHB	Protein mago nashi homolog 2	1.40672	2.1011e-06
sp|Q96EX1|SIM12_HUMAN	SMIM12	Small integral membrane protein 12	1.40945	0.00115863
tr|J3KRN6|J3KRN6_HUMAN	BEAN1	Protein BEAN1 (Fragment)	1.41146	0.048917
sp|Q9NTN3|S35D1_HUMAN	SLC35D1	UDP-glucuronic acid/UDP-N-acetylgalactosamine transporter	1.41476	0.0403072
sp|Q8NEJ9|NGDN_HUMAN	NGDN	Neuroguidin	1.41627	3.70826e-05
sp|Q96AQ6|PBIP1_HUMAN	PBXIP1	Pre-B-cell leukemia transcription factor-interacting protein 1	1.41635	3.88539e-06
sp|Q15392|DHC24_HUMAN	DHCR24	Delta(24)-sterol reductase	1.42456	0.0257185
sp|Q96MG8|PCMD1_HUMAN	PCMTD1	Protein-L-isoaspartate O-methyltransferase domain-containing protein 1	1.43171	0.0407838
sp|P23219-6|PGH1_HUMAN	PTGS1	Isoform 6 of Prostaglandin G/H synthase 1	1.43346	0.0153785
sp|Q9NXG0-2|CNTLN_HUMAN	CNTLN	Isoform 2 of Centlein	1.44214	0.000495956
sp|P46782|RS5_HUMAN	RPS5	40S ribosomal protein S5	1.46159	2.91892e-05
sp|P18124|RL7_HUMAN	RPL7	60S ribosomal protein L7	1.46283	4.23182e-06
sp|Q7Z7A1|CNTRL_HUMAN	CNTRL	Centriolin	1.47212	1.85623e-05
sp|Q13541|4EBP1_HUMAN	EIF4EBP1	Eukaryotic translation initiation factor 4E-binding protein 1	1.51644	0.0122253
sp|Q96CG8|CTHR1_HUMAN	CTHRC1	Collagen triple helix repeat-containing protein 1	1.51823	0.0210831
sp|Q96BY9|SARAF_HUMAN	SARAF	Store-operated calcium entry-associated regulatory factor	1.52122	0.0134544
sp|Q9UBS3|DNJB9_HUMAN	DNAJB9	DnaJ homolog subfamily B member 9	1.58677	0.000258394
sp|A6NK97-2|S22AK_HUMAN	SLC22A20P	Isoform 2 of Solute carrier family 22 member 20	1.59437	0.00726141
sp|Q14534|ERG1_HUMAN	SQLE	Squalene monooxygenase	1.62758	7.7087e-05
sp|P08910|ABHD2_HUMAN	ABHD2	Monoacylglycerol lipase ABHD2	1.64329	5.49937e-05
sp|Q15011|HERP1_HUMAN	HERPUD1	Homocysteine-responsive endoplasmic reticulum-resident ubiquitin-like domain member 1 protein	1.65658	0.0108157
sp|P55061-2|BI1_HUMAN	TMBIM6	Isoform 2 of Bax inhibitor 1	1.71049	0.00261333
sp|Q8WUJ3|CEMIP_HUMAN	CEMIP	Cell migration-inducing and hyaluronan-binding protein	1.82662	0.0472637
sp|Q6UWP8|SBSN_HUMAN	SBSN	Suprabasin	1.92233	0.0149874
sp|P25311|ZA2G_HUMAN	AZGP1	Zinc-alpha-2-glycoprotein	1.9755	0.0134997
sp|Q9H2A7|CXL16_HUMAN	CXCL16	C-X-C motif chemokine 16	3.086	0.0183398
sp|Q96FX8|PERP_HUMAN	PERP	p53 apoptosis effector related to PMP-22	4.71254	4.5612e-05
