# Supplementary material for: Proteome-Wide Profiling Using Sample Multiplexing of a Human Cell Line Treated with Cannabidiol (CBD) and Tetrahydrocannabinol (THC)
Source: Proteomes. 2023 Nov 2;11(4):36. doi: 10.3390/proteomes11040036 (PMC10661330; doi:10.3390/proteomes11040036)
Supplement: Supplementary file 1 [file proteomes-11-00036-s001.zip › Abyadeh Table S4.xlsx]

## Sheet: Info
Term	Description
KEGG Down_CBD	Enriched KEGG pathways using down regulated proteins in CBD treatment group
Down BP_CBD	Enriched Biological Processes using down regulated proteins in CBD treatment group
Down CC_CBD	Enriched Cellular components using down regulated proteins in CBD treatment group
KEGG Up_CBD	Enriched KEGG pathways using up regulated proteins in CBD treatment group
Up BP_CBD	Enriched Biological Processes using up regulated proteins in CBD treatment group
Up CC_CBD	Enriched Cellular components using up regulated proteins in CBD treatment group
KEGG Down_THC	Enriched KEGG pathways using down regulated proteins in THC treatment group
Down BP_THC	Enriched Biological Processes using down regulated proteins in THC treatment group
Down CC_THC	Enriched Cellular components using down regulated proteins in THC treatment group
KEGG Up_THC	Enriched KEGG pathways using up regulated proteins in THC treatment group
Up BP_THC	Enriched Biological Processes using up regulated proteins in THC treatment group
Up CC_THC	Enriched Cellular components using up regulated proteins in THC treatment group
Venn KEGG pathways	Venn diagram results of up and down regulated KEGG pathways identified in CBD and THC treatment groups
Venn BP	Venn diagram results of up and down regulated Biological Processes identified in CBD and THC treatment groups
Venn CC	Venn diagram results of up and down regulated Cellular Components identified in CBD and THC treatment groups
CBD_THC_DEPS_Upset plot	Results of upset plot comparing differentially expressed proteins between CBD and THC treatment groups (Figure 2 A)
Down	Down regulated
Up	Up regulated
CBD	CBD treated group vs CTRL group
THC	THC treated group vs CTRL group

## Sheet: KEGG Down_CBD
Term	Overlap	P-value	Adjusted P-value	Old P-value	Old Adjusted P-value	Odds Ratio	Combined Score	Genes
Oxidative phosphorylation	13-133	3.8081e-11	3.57961e-09	0	0	14.9424	358.488	NDUFB8	NDUFA7	NDUFA6	NDUFA12	NDUFA2	NDUFA1	COX7A2	COX7C	NDUFS6	NDUFS4	NDUFAB1	NDUFV3	NDUFV1
Non-alcoholic fatty liver disease	13-155	2.62783e-10	1.23508e-08	0	0	12.6133	278.246	NDUFB8	NDUFA7	NDUFA6	NDUFA12	NDUFA2	NDUFA1	COX7A2	COX7C	NDUFS6	NDUFS4	NDUFAB1	NDUFV3	NDUFV1
Thermogenesis	14-232	3.99905e-09	1.25303e-07	0	0	8.87595	171.636	NDUFB8	NDUFA7	NDUFA6	NDUFA12	NDUFA2	NDUFA1	COX7A2	COX7C	NDUFS6	NDUFS4	NDUFAB1	NDUFV3	NDUFV1	COA5
Diabetic cardiomyopathy	13-203	7.20858e-09	1.69402e-07	0	0	9.40383	176.303	NDUFB8	NDUFA7	NDUFA6	NDUFA12	NDUFA2	NDUFA1	COX7A2	COX7C	NDUFS6	NDUFS4	NDUFAB1	NDUFV3	NDUFV1
Parkinson disease	14-249	9.8794e-09	1.85733e-07	0	0	8.22673	151.642	NDUFB8	NDUFA7	NDUFA6	NDUFA12	NDUFA2	NDUFA1	COX7A2	COX7C	TXN2	NDUFS6	NDUFS4	NDUFAB1	NDUFV3	NDUFV1
Huntington disease	15-306	1.81433e-08	2.84245e-07	0	0	7.14813	127.415	DNAH3	NDUFB8	NDUFA7	NDUFA6	NDUFA12	NDUFA2	NDUFA1	COX7A2	COX7C	NDUFS6	NDUFS4	NDUFAB1	NDUFV3	NDUFV1	POLR2L
Retrograde endocannabinoid signaling	11-148	2.32806e-08	3.12625e-07	0	0	10.9125	191.794	NDUFB8	NDUFA7	NDUFA6	NDUFA12	NDUFS6	NDUFS4	NDUFA2	NDUFAB1	NDUFA1	NDUFV3	NDUFV1
Amyotrophic lateral sclerosis	15-364	1.7612e-07	1.97269e-06	0	0	5.94251	92.4185	DNAH3	NDUFB8	NDUFA7	NDUFA6	NDUFA12	NDUFA2	NDUFA1	COX7A2	COX7C	TOMM40L	NDUFS6	NDUFS4	NDUFAB1	NDUFV3	NDUFV1
Pathways of neurodegeneration	17-475	1.92452e-07	1.97269e-06	0	0	5.17675	80.0502	DNAH3	NDUFB8	NDUFA7	NDUFA6	NDUFA12	NDUFA2	PSEN2	NDUFA1	COX7A2	DKK1	COX7C	TOMM40L	NDUFS6	NDUFS4	NDUFAB1	NDUFV3	NDUFV1
Alzheimer disease	15-369	2.09861e-07	1.97269e-06	0	0	5.85707	90.0632	NDUFB8	NDUFA7	NDUFA6	NDUFA12	NDUFA2	PSEN2	NDUFA1	COX7A2	DKK1	COX7C	NDUFS6	NDUFS4	NDUFAB1	NDUFV3	NDUFV1
Prion disease	13-273	2.35447e-07	2.012e-06	0	0	6.84755	104.506	NDUFB8	NDUFA7	NDUFA6	NDUFA12	NDUFA2	NDUFA1	COX7A2	COX7C	NDUFS6	NDUFS4	NDUFAB1	NDUFV3	NDUFV1
Cardiac muscle contraction	4-87	0.00480093	0.0376073	0	0	6.26538	33.4505	COX7A2	COX7C	CACNG4	SLC8A2
Arrhythmogenic right ventricular cardiomyopathy	3-77	0.0223687	0.161743	0	0	5.23847	19.9067	LAMA1	CACNG4	SLC8A2
Hypertrophic cardiomyopathy	3-90	0.0334085	0.224314	0	0	4.45278	15.1348	LAMA1	CACNG4	SLC8A2
Dilated cardiomyopathy	3-96	0.0392977	0.246265	0	0	4.16424	13.4779	LAMA1	CACNG4	SLC8A2
Type I diabetes mellitus	2-43	0.0443189	0.260373	0	0	6.27273	19.548	PTPRN2	CPE
Cholesterol metabolism	2-50	0.0580525	0.317161	0	0	5.35606	15.2455	STARD3	PLTP
Sulfur relay system	1-22	0.0607329	0.317161	0	0	18.2829	51.2155	URM1
Lysosome	3-128	0.0786902	0.389309	0	0	3.09318	7.86359	NEU1	IDS	LGMN
Spliceosome	3-150	0.112708	0.508728	0	0	2.62732	5.73532	SF3B5	LSM5	LSM3
PPAR signaling pathway	2-74	0.113652	0.508728	0	0	3.56638	7.7555	APOA5	PLTP
RNA degradation	2-79	0.126501	0.515118	0	0	3.33395	6.89296	LSM5	LSM3
Neuroactive ligand-receptor interaction	5-341	0.128702	0.515118	0	0	1.9225	3.94163	CALCB	GAL	GRM7	NPY	VIP
Other glycan degradation	1-22	0.13152	0.515118	0	0	7.52448	15.2642	NEU1
Glycosaminoglycan degradation	1-22	0.1383	0.520007	0	0	7.10609	14.0582	IDS
Protein processing in endoplasmic reticulum	3-171	0.149444	0.540298	0	0	2.29645	4.36517	DNAJC1	LMAN2	MBTPS2
Terpenoid backbone biosynthesis	1-22	0.158327	0.551211	0	0	6.09002	11.2245	PDSS1
Glycosylphosphatidylinositol (GPI)-anchor biosynthesis	1-22	0.184311	0.618759	0	0	5.11458	8.64942	PGAP1
RNA polymerase	1-22	0.215674	0.699081	0	0	4.26108	6.53644	POLR2L
Leukocyte transendothelial migration	2-114	0.223281	0.699614	0	0	2.28803	3.4305	CD99L2	JAM2
Neurotrophin signaling pathway	2-119	0.237656	0.720635	0	0	2.1897	3.14645	NTRK1	PSEN2
Thyroid cancer	1-37	0.251731	0.722134	0	0	3.54982	4.8966	NTRK1
Various types of N-glycan biosynthesis	1-39	0.26338	0.722134	0	0	3.36265	4.4863	MGAT4B
Glycine, serine and threonine metabolism	1-40	0.269137	0.722134	0	0	3.27626	4.3002	ALAS1
Porphyrin and chlorophyll metabolism	1-43	0.286141	0.722134	0	0	3.04178	3.80609	ALAS1
Fluid shear stress and atherosclerosis	2-139	0.295397	0.722134	0	0	1.86814	2.27807	GSTM1	TXN2
Proteasome	1-46	0.302751	0.722134	0	0	2.83857	3.39164	PSMB9
Sphingolipid metabolism	1-49	0.318978	0.722134	0	0	2.66075	3.04026	NEU1
Cell adhesion molecules	2-148	0.321249	0.722134	0	0	1.75218	1.98967	CD99L2	JAM2
N-Glycan biosynthesis	1-50	0.324303	0.722134	0	0	2.60632	2.93492	MGAT4B
Adrenergic signaling in cardiomyocytes	2-150	0.326965	0.722134	0	0	1.72833	1.9321	CACNG4	SLC8A2
Endocrine and other factor-regulated calcium reabsorption	1-53	0.340031	0.722134	0	0	2.45558	2.64888	SLC8A2
Regulation of lipolysis in adipocytes	1-55	0.350314	0.722134	0	0	2.3644	2.48008	NPY
Glutathione metabolism	1-57	0.360437	0.722134	0	0	2.27972	2.32631	GSTM1
Notch signaling pathway	1-59	0.370404	0.722134	0	0	2.20089	2.18584	PSEN2
Mineral absorption	1-60	0.375329	0.722134	0	0	2.16348	2.1201	SLC8A2
Viral myocarditis	1-60	0.375329	0.722134	0	0	2.16348	2.1201	LAMA1
Cytosolic DNA-sensing pathway	1-63	0.389877	0.722134	0	0	2.05848	1.93893	POLR2L
MAPK signaling pathway	3-294	0.403021	0.722134	0	0	1.3175	1.1973	NTRK1	MAPK8IP2	CACNG4
Mitophagy	1-68	0.413379	0.722134	0	0	1.90438	1.68231	FUNDC1
NOD-like receptor signaling pathway	2-181	0.413422	0.722134	0	0	1.42676	1.26024	TXNIP	TXN2
Adipocytokine signaling pathway	1-69	0.41797	0.722134	0	0	1.87628	1.63677	NPY
Renal cell carcinoma	1-69	0.41797	0.722134	0	0	1.87628	1.63677	ELOC
Central carbon metabolism in cancer	1-70	0.422525	0.722134	0	0	1.84899	1.59292	NTRK1
Epithelial cell signaling in Helicobacter pylori infection	1-70	0.422525	0.722134	0	0	1.84899	1.59292	JAM2
Metabolism of xenobiotics by cytochrome P450	1-76	0.449124	0.741817	0	0	1.70056	1.36122	GSTM1
Synaptic vesicle cycle	1-78	0.457717	0.741817	0	0	1.65622	1.29434	SLC6A2
Antigen processing and presentation	1-78	0.457717	0.741817	0	0	1.65622	1.29434	LGMN
Peroxisome	1-82	0.474505	0.755991	0	0	1.57411	1.17347	PEX19
ECM-receptor interaction	1-88	0.498724	0.776671	0	0	1.46511	1.01928	LAMA1
cAMP signaling pathway	2-216	0.50401	0.776671	0	0	1.19129	0.81622	NPY	VIP
Small cell lung cancer	1-92	0.514251	0.77967	0	0	1.40043	0.931346	LAMA1
Inflammatory mediator regulation of TRP channels	1-98	0.536649	0.780013	0	0	1.3134	0.817477	NTRK1
Viral protein interaction with cytokine and cytokine receptor	1-100	0.543884	0.780013	0	0	1.28674	0.783648	TNFRSF10D
Amoebiasis	1-102	0.551007	0.780013	0	0	1.26113	0.751643	LAMA1
Protein digestion and absorption	1-103	0.554528	0.780013	0	0	1.2487	0.736284	SLC8A2
Calcium signaling pathway	2-240	0.560732	0.780013	0	0	1.06985	0.618919	NTRK1	SLC8A2
Drug metabolism	1-108	0.571721	0.780013	0	0	1.19005	0.665363	GSTM1
HIF-1 signaling pathway	1-109	0.57508	0.780013	0	0	1.17897	0.652263	ELOC
Toxoplasmosis	1-112	0.584999	0.780013	0	0	1.14693	0.614922	LAMA1
Glutamatergic synapse	1-114	0.591485	0.780013	0	0	1.12652	0.591558	GRM7
Pathways in cancer	4-531	0.597457	0.780013	0	0	0.964596	0.496837	NTRK1	GSTM1	LAMA1	ELOC
Vascular smooth muscle contraction	1-133	0.648284	0.831625	0	0	0.963441	0.417581	CALCB
Apelin signaling pathway	1-137	0.659202	0.831625	0	0	0.934915	0.389603	SLC8A2
Ubiquitin mediated proteolysis	1-140	0.667169	0.831625	0	0	0.914597	0.370148	ELOC
Apoptosis	1-142	0.672377	0.831625	0	0	0.901533	0.35785	NTRK1
Phospholipase D signaling pathway	1-148	0.687522	0.832695	0	0	0.864472	0.323885	GRM7
mTOR signaling pathway	1-154	0.70197	0.832695	0	0	0.830318	0.29382	TBC1D7
Oxytocin signaling pathway	1-154	0.70197	0.832695	0	0	0.830318	0.29382	CACNG4
Wnt signaling pathway	1-166	0.728905	0.832695	0	0	0.769462	0.243313	DKK1
cGMP-PKG signaling pathway	1-167	0.731037	0.832695	0	0	0.764788	0.239601	SLC8A2
Hepatocellular carcinoma	1-168	0.733153	0.832695	0	0	0.76017	0.235958	GSTM1
Tight junction	1-169	0.735252	0.832695	0	0	0.755607	0.232381	JAM2
PI3K-Akt signaling pathway	2-354	0.766166	0.849899	0	0	0.719156	0.191552	NTRK1	LAMA1
Alcoholism	1-186	0.768526	0.849899	0	0	0.68558	0.1805	NPY
Transcriptional misregulation in cancer	1-192	0.779249	0.851737	0	0	0.663841	0.165578	NTRK1
Focal adhesion	1-201	0.794415	0.858333	0	0	0.633677	0.145841	LAMA1
Human immunodeficiency virus 1 infection	1-212	0.811552	0.866885	0	0	0.600306	0.125348	ELOC
Ras signaling pathway	1-232	0.839153	0.885513	0	0	0.547773	0.0960586	NTRK1
Chemical carcinogenesis	1-239	0.847832	0.885513	0	0	0.531472	0.0877316	GSTM1
Salmonella infection	1-249	0.859429	0.887762	0	0	0.509781	0.0772252	TXN2
Cytokine-cytokine receptor interaction	1-295	0.902434	0.922052	0	0	0.42901	0.0440423	TNFRSF10D
Human papillomavirus infection	1-331	0.92673	0.936695	0	0	0.381505	0.0290298	LAMA1
Olfactory transduction	1-440	0.969313	0.969313	0	0	0.285179	0.00888832	SLC8A2

## Sheet: Down BP_CBD
Term	Overlap	P-value	Adjusted P-value	Old P-value	Old Adjusted P-value	Odds Ratio	Combined Score	Genes
mitochondrial electron transport, NADH to ubiquinone (GO:0006120)	11-39	6.31685e-15	6.57584e-12	0	0	53.6887	1755.38	NDUFB8	NDUFA7	NDUFA6	NDUFA12	NDUFS6	NDUFA2	NDUFAB1	NDUFS4	NDUFA1	NDUFV3	NDUFV1
aerobic electron transport chain (GO:0019646)	12-70	2.38101e-13	9.87644e-11	0	0	28.4282	826.295	NDUFB8	NDUFA7	NDUFA6	NDUFA12	NDUFS6	NDUFS4	NDUFA2	NDUFAB1	NDUFA1	NDUFV3	COX7C	NDUFV1
mitochondrial ATP synthesis coupled electron transport (GO:0042775)	12-71	2.84624e-13	9.87644e-11	0	0	27.9449	807.262	NDUFB8	NDUFA7	NDUFA6	NDUFA12	NDUFS6	NDUFS4	NDUFA2	NDUFAB1	NDUFA1	NDUFV3	COX7C	NDUFV1
mitochondrial respiratory chain complex I assembly (GO:0032981)	11-58	7.56086e-13	1.57417e-10	0	0	31.9541	891.858	NDUFB8	NDUFA7	NDUFA6	NDUFA12	NDUFS6	NDUFS4	NDUFA2	NDUFAB1	NDUFA1	NDUFV3	NDUFV1
NADH dehydrogenase complex assembly (GO:0010257)	11-58	7.56086e-13	1.57417e-10	0	0	31.9541	891.858	NDUFB8	NDUFA7	NDUFA6	NDUFA12	NDUFS6	NDUFS4	NDUFA2	NDUFAB1	NDUFA1	NDUFV3	NDUFV1
mitochondrial respiratory chain complex assembly (GO:0033108)	12-90	5.36429e-12	9.30704e-10	0	0	21.1175	548.026	NDUFB8	NDUFA7	NDUFA6	NDUFA12	NDUFS6	NDUFS4	NDUFA2	NDUFAB1	NDUFA1	NDUFV3	NDUFV1	COA5
ATP synthesis coupled electron transport (GO:0042773)	3-22	9.15079e-06	0.00136085	0	0	129.68	1504.5	NDUFA12	NDUFV3	NDUFV1
cellular protein metabolic process (GO:0044267)	12-417	0.000108717	0.0141467	0	0	3.99979	36.5052	TGOLN2	MRPL41	IGFBP5	VGF	IGFBP4	PSEN2	CPE	SCG3	SCG2	APOA5	CHGB	LGMN
post-translational protein modification (GO:0043687)	10-345	0.000388053	0.042838	0	0	3.98875	31.3291	TGOLN2	IGFBP5	VGF	IGFBP4	SCG3	ELOC	SCG2	APOA5	CHGB	PSMB9
regulation of insulin-like growth factor receptor signaling pathway (GO:0043567)	3-22	0.000411508	0.042838	0	0	24.299	189.427	IGFBP5	IGFBP4	MYORG
protein maturation (GO:0051604)	5-97	0.000979958	0.0927396	0	0	7.10913	49.252	TSPAN14	CPD	NDUFAB1	PSEN2	CPE
protein secretion (GO:0009306)	4-64	0.00157323	0.131427	0	0	8.67719	56.008	GAL	VIP	SCG2	WLS
positive regulation of vascular associated smooth muscle cell migration (GO:1904754)	2-22	0.00164125	0.131427	0	0	42.9394	275.34	IGFBP5	ADAMTS1
response to cAMP (GO:0051591)	3-38	0.00321461	0.232095	0	0	11.0975	63.7001	IGFBP5	VGF	NDUFS4
regulation of canonical Wnt signaling pathway (GO:0060828)	7-253	0.00376784	0.232095	0	0	3.74273	20.8891	IGFBP4	FRMD8	GID8	GSKIP	DKK1	WLS	PSMB9
regulation of vascular associated smooth muscle cell migration (GO:1904752)	2-22	0.00379021	0.232095	0	0	25.7584	143.612	IGFBP5	ADAMTS1
protein insertion into mitochondrial inner membrane (GO:0045039)	2-22	0.00379021	0.232095	0	0	25.7584	143.612	TIMM8B	TIMM8A
peptide metabolic process (GO:0006518)	4-83	0.00405954	0.234777	0	0	6.58394	36.2557	GSTM1	CPD	PSEN2	CPE
organic substance transport (GO:0071702)	5-136	0.00429672	0.235415	0	0	4.98281	27.1558	PEX19	TXNIP	PLTP	SLC6A2	APOA5
regulation of signal transduction (GO:0009966)	6-198	0.00465045	0.242056	0	0	4.09417	21.9889	IGFBPL1	IGFBP5	IGFBP4	GSKIP	MAPK8IP2	SLC8A2
sulfate transport (GO:0008272)	2-22	0.00517273	0.256419	0	0	21.4632	112.99	SLC26A2	SLC25A14
regulation of synaptic transmission, glutamatergic (GO:0051966)	3-46	0.00552771	0.261561	0	0	9.02918	46.9335	GRM7	MAPK8IP2	CACNG4
cognition (GO:0050890)	3-48	0.00622728	0.281852	0	0	8.62702	43.815	CUX2	SLC8A2	STRA6
response to organophosphorus (GO:0046683)	2-22	0.00675186	0.292862	0	0	18.3952	91.9379	VGF	NDUFS4
response to purine-containing compound (GO:0014074)	2-22	0.00761316	0.304819	0	0	17.168	83.7432	VGF	NDUFS4
positive regulation of smooth muscle cell migration (GO:0014911)	2-22	0.00761316	0.304819	0	0	17.168	83.7432	IGFBP5	ADAMTS1
protein targeting to mitochondrion (GO:0006626)	3-55	0.00907906	0.350048	0	0	7.46305	35.0896	TIMM8B	TIMM8A	TOMM40L
protein processing (GO:0016485)	4-106	0.00956574	0.355641	0	0	5.0934	23.6821	CPD	PSEN2	CPE	LGMN
insulin secretion (GO:0030073)	2-22	0.0104747	0.366463	0	0	14.3045	65.2112	PTPRN2	GAL
positive regulation of vascular associated smooth muscle cell proliferation (GO:1904707)	2-22	0.0115185	0.366463	0	0	13.5509	60.4886	IGFBP5	ADAMTS1
membrane protein intracellular domain proteolysis (GO:0031293)	2-22	0.0126061	0.366463	0	0	12.8727	56.2999	PSEN2	MBTPS2
zinc ion transmembrane transport (GO:0071577)	2-22	0.0126061	0.366463	0	0	12.8727	56.2999	SLC39A10	SLC39A3
neuropeptide signaling pathway (GO:0007218)	3-63	0.0131364	0.366463	0	0	6.46536	28.0103	GAL	NPY	CPE
cellular protein modification process (GO:0006464)	15-1025	0.0142645	0.366463	0	0	1.98378	8.43102	NTRK1	PGAP1	PTPRN2	IGFBP5	IGFBP4	APOA5	PTPN14	PSMB9	TGOLN2	VGF	CPE	SCG3	ELOC	SCG2	CHGB
protein insertion into mitochondrial membrane (GO:0051204)	2-22	0.0149095	0.366463	0	0	11.7013	49.2128	TIMM8B	TIMM8A
regulation of AMPA receptor activity (GO:2000311)	2-22	0.0161239	0.366463	0	0	11.192	46.1944	MAPK8IP2	CACNG4
negative regulation of endothelial cell apoptotic process (GO:2000352)	2-22	0.0186746	0.366463	0	0	10.2956	40.9825	TNIP2	SCG2
camera-type eye development (GO:0043010)	2-22	0.0186746	0.366463	0	0	10.2956	40.9825	LAMA1	STRA6
peptide hormone secretion (GO:0030072)	2-22	0.0186746	0.366463	0	0	10.2956	40.9825	GAL	VIP
modulation of excitatory postsynaptic potential (GO:0098815)	2-22	0.0186746	0.366463	0	0	10.2956	40.9825	CUX2	SLC8A2
positive regulation of canonical Wnt signaling pathway (GO:0090263)	4-130	0.0189683	0.366463	0	0	4.11821	16.3286	GID8	GSKIP	WLS	PSMB9
positive regulation of synaptic transmission (GO:0050806)	3-73	0.0194502	0.366463	0	0	5.53894	21.8228	CACNG4	SLC8A2	LGMN
regulation of transcription from RNA polymerase II promoter in response to hypoxia (GO:0061418)	3-75	0.0208812	0.366463	0	0	5.38453	20.8322	ELOC	BACH1	PSMB9
positive regulation of mononuclear cell migration (GO:0071677)	2-31	0.0242439	0.366463	0	0	8.87371	33.0066	JAM2	LGMN
lipid biosynthetic process (GO:0008610)	3-80	0.0247056	0.366463	0	0	5.03361	18.628	NDUFAB1	PDSS1	PAM
negative regulation of smooth muscle cell proliferation (GO:0048662)	2-33	0.0272517	0.366463	0	0	8.30038	29.9033	IGFBP5	VIP
exonucleolytic catabolism of deadenylated mRNA (GO:0043928)	2-33	0.0272517	0.366463	0	0	8.30038	29.9033	LSM5	LSM3
central nervous system neuron differentiation (GO:0021953)	2-34	0.0288092	0.366463	0	0	8.04058	28.5205	ZC4H2	NPY
cellular response to amyloid-beta (GO:1904646)	2-35	0.0304014	0.366463	0	0	7.79654	27.2354	NTRK1	LGMN
nuclear-transcribed mRNA catabolic process, exonucleolytic (GO:0000291)	2-35	0.0304014	0.366463	0	0	7.79654	27.2354	LSM5	LSM3
regulation of transcription from RNA polymerase II promoter in response to stress (GO:0043618)	3-87	0.0306507	0.366463	0	0	4.61251	16.0751	ELOC	BACH1	PSMB9
dephosphorylation (GO:0016311)	4-153	0.0320017	0.366463	0	0	3.47845	11.9727	PTPRN2	PLPPR2	PLPPR4	PTPN14
positive regulation of Wnt signaling pathway (GO:0030177)	4-153	0.0320017	0.366463	0	0	3.47845	11.9727	GID8	GSKIP	WLS	PSMB9
negative regulation of epithelial cell apoptotic process (GO:1904036)	2-37	0.0336879	0.366463	0	0	7.35028	24.922	TNIP2	SCG2
regulation of vascular associated smooth muscle cell proliferation (GO:1904705)	2-37	0.0336879	0.366463	0	0	7.35028	24.922	IGFBP5	ADAMTS1
regulation of apoptotic signaling pathway (GO:2001233)	2-38	0.0353808	0.366463	0	0	7.14574	23.8781	BCL2L12	MAPK8IP2
negative regulation of apoptotic process (GO:0043066)	8-485	0.0366731	0.366463	0	0	2.19469	7.255	NTRK1	MIEN1	PSEN2	MAPK8IP2	VIP	DKK1	TNFRSF10D	LGMN
negative regulation of secretion by cell (GO:1903531)	2-39	0.0371061	0.366463	0	0	6.95226	22.9006	CHGA	GRM7
phospholipid dephosphorylation (GO:0046839)	2-39	0.0371061	0.366463	0	0	6.95226	22.9006	PLPPR2	PLPPR4
regulation of receptor-mediated endocytosis (GO:0048259)	2-39	0.0371061	0.366463	0	0	6.95226	22.9006	APOA5	DKK1
membrane protein proteolysis (GO:0033619)	2-39	0.0371061	0.366463	0	0	6.95226	22.9006	PSEN2	MBTPS2
pulmonary artery morphogenesis (GO:0061156)	1-22	0.0383999	0.366463	0	0	32	104.31	STRA6
regulation of barbed-end actin filament capping (GO:2000812)	1-22	0.0383999	0.366463	0	0	32	104.31	MTPN
negative regulation of insulin-like growth factor receptor signaling pathway (GO:0043569)	1-22	0.0383999	0.366463	0	0	32	104.31	IGFBP5
negative regulation of myelination (GO:0031642)	1-22	0.0383999	0.366463	0	0	32	104.31	JAM2
regulation of intestinal lipid absorption (GO:1904729)	1-22	0.0383999	0.366463	0	0	32	104.31	APOA5
oxaloacetate transport (GO:0015729)	1-22	0.0383999	0.366463	0	0	32	104.31	SLC25A14
diaphragm development (GO:0060539)	1-22	0.0383999	0.366463	0	0	32	104.31	STRA6
positive regulation of cardiac muscle contraction (GO:0060452)	1-22	0.0383999	0.366463	0	0	32	104.31	CHGA
female genitalia development (GO:0030540)	1-22	0.0383999	0.366463	0	0	32	104.31	STRA6
hematopoietic stem cell migration (GO:0035701)	1-22	0.0383999	0.366463	0	0	32	104.31	JAM2
hemoglobin metabolic process (GO:0020027)	1-22	0.0383999	0.366463	0	0	32	104.31	ALAS1
positive regulation of mitochondrial depolarization (GO:0051901)	1-22	0.0383999	0.366463	0	0	32	104.31	MLLT11
short-term memory (GO:0007614)	1-22	0.0383999	0.366463	0	0	32	104.31	CUX2
toll-like receptor 2 signaling pathway (GO:0034134)	1-22	0.0383999	0.366463	0	0	32	104.31	TNIP2
microtubule nucleation by microtubule organizing center (GO:0051418)	1-22	0.0383999	0.366463	0	0	32	104.31	MZT1
tRNA thio-modification (GO:0034227)	1-22	0.0383999	0.366463	0	0	32	104.31	URM1
protein lipoylation (GO:0009249)	1-22	0.0383999	0.366463	0	0	32	104.31	NDUFAB1
digestive tract development (GO:0048565)	2-40	0.0388632	0.366463	0	0	6.76897	21.9836	NPY	STRA6
sulfur compound catabolic process (GO:0044273)	2-40	0.0388632	0.366463	0	0	6.76897	21.9836	IDS	TXN2
negative regulation of canonical Wnt signaling pathway (GO:0090090)	4-165	0.0404589	0.366463	0	0	3.21723	10.3192	IGFBP4	FRMD8	DKK1	PSMB9
negative regulation of neuron death (GO:1901215)	3-98	0.0413703	0.366463	0	0	4.07616	12.9834	CHGA	NTRK1	LGMN
cellular respiration (GO:0045333)	2-42	0.0424701	0.366463	0	0	6.42987	20.3117	NDUFS4	SLC25A14
lipid modification (GO:0030258)	2-43	0.0443189	0.366463	0	0	6.27273	19.548	PLPPR2	PLPPR4
3'-phosphoadenosine 5'-phosphosulfate biosynthetic process (GO:0050428)	1-22	0.0459022	0.366463	0	0	25.5987	78.8758	SLC26A2
negative regulation of anion transport (GO:1903792)	1-22	0.0459022	0.366463	0	0	25.5987	78.8758	GRM7
negative regulation of cardiac muscle cell differentiation (GO:2000726)	1-22	0.0459022	0.366463	0	0	25.5987	78.8758	DKK1
purine ribonucleoside bisphosphate biosynthetic process (GO:0034036)	1-22	0.0459022	0.366463	0	0	25.5987	78.8758	SLC26A2
pyrimidine nucleotide-sugar transmembrane transport (GO:0090481)	1-22	0.0459022	0.366463	0	0	25.5987	78.8758	SLC35C2
attachment of GPI anchor to protein (GO:0016255)	1-22	0.0459022	0.366463	0	0	25.5987	78.8758	PGAP1
cell junction disassembly (GO:0150146)	1-22	0.0459022	0.366463	0	0	25.5987	78.8758	DKK1
regulation of epinephrine secretion (GO:0014060)	1-22	0.0459022	0.366463	0	0	25.5987	78.8758	VIP
norepinephrine transport (GO:0015874)	1-22	0.0459022	0.366463	0	0	25.5987	78.8758	SLC6A2
regulation of macromolecule biosynthetic process (GO:0010556)	1-22	0.0459022	0.366463	0	0	25.5987	78.8758	MTPN
ear development (GO:0043583)	1-22	0.0459022	0.366463	0	0	25.5987	78.8758	STRA6
regulation of relaxation of cardiac muscle (GO:1901897)	1-22	0.0459022	0.366463	0	0	25.5987	78.8758	CHGA
regulation of very-low-density lipoprotein particle remodeling (GO:0010901)	1-22	0.0459022	0.366463	0	0	25.5987	78.8758	APOA5
glycolipid transport (GO:0046836)	1-22	0.0459022	0.366463	0	0	25.5987	78.8758	PLTP
imitative learning (GO:0098596)	1-22	0.0459022	0.366463	0	0	25.5987	78.8758	STRA6
signal complex assembly (GO:0007172)	1-22	0.0459022	0.366463	0	0	25.5987	78.8758	MAPK8IP2
spinal cord motor neuron differentiation (GO:0021522)	1-22	0.0459022	0.366463	0	0	25.5987	78.8758	ZC4H2
succinate transmembrane transport (GO:0071422)	1-22	0.0459022	0.366463	0	0	25.5987	78.8758	SLC25A14
positive regulation of tau-protein kinase activity (GO:1902949)	1-22	0.0459022	0.366463	0	0	25.5987	78.8758	DKK1
positive regulation of Wnt signaling pathway, planar cell polarity pathway (GO:2000096)	1-22	0.0459022	0.366463	0	0	25.5987	78.8758	DKK1
vocal learning (GO:0042297)	1-22	0.0459022	0.366463	0	0	25.5987	78.8758	STRA6
negative regulation of amino acid transport (GO:0051956)	1-22	0.0459022	0.366463	0	0	25.5987	78.8758	GRM7
regulation of endothelial cell apoptotic process (GO:2000351)	2-44	0.046197	0.366463	0	0	6.12307	18.8274	TNIP2	SCG2
positive regulation of biosynthetic process (GO:0009891)	2-44	0.046197	0.366463	0	0	6.12307	18.8274	MTPN	APOA5
response to amyloid-beta (GO:1904645)	2-44	0.046197	0.366463	0	0	6.12307	18.8274	NTRK1	LGMN
mitochondrion organization (GO:0007005)	4-175	0.0483881	0.366463	0	0	3.02755	9.16893	TIMM8B	ALAS1	PTCD2	COX7A2
positive regulation of smooth muscle cell proliferation (GO:0048661)	2-46	0.0500393	0.366463	0	0	5.84416	17.5029	IGFBP5	ADAMTS1
negative regulation of cardiocyte differentiation (GO:1905208)	1-22	0.0533464	0.366463	0	0	21.3312	62.5206	DKK1
negative regulation of catecholamine secretion (GO:0033604)	1-22	0.0533464	0.366463	0	0	21.3312	62.5206	CHGA
calcium ion export (GO:1901660)	1-22	0.0533464	0.366463	0	0	21.3312	62.5206	SLC8A2
catecholamine uptake (GO:0090493)	1-22	0.0533464	0.366463	0	0	21.3312	62.5206	SLC6A2
negative regulation of nervous system process (GO:0031645)	1-22	0.0533464	0.366463	0	0	21.3312	62.5206	JAM2
nose development (GO:0043584)	1-22	0.0533464	0.366463	0	0	21.3312	62.5206	STRA6
Notch receptor processing, ligand-dependent (GO:0035333)	1-22	0.0533464	0.366463	0	0	21.3312	62.5206	PSEN2
regulation of muscle organ development (GO:0048634)	1-22	0.0533464	0.366463	0	0	21.3312	62.5206	MTPN
positive regulation of B cell receptor signaling pathway (GO:0050861)	1-22	0.0533464	0.366463	0	0	21.3312	62.5206	SLC39A10
positive regulation of catecholamine secretion (GO:0033605)	1-22	0.0533464	0.366463	0	0	21.3312	62.5206	VIP
ganglioside catabolic process (GO:0006689)	1-22	0.0533464	0.366463	0	0	21.3312	62.5206	NEU1
positive regulation of fibroblast apoptotic process (GO:2000271)	1-22	0.0533464	0.366463	0	0	21.3312	62.5206	PRDM11
inhibition of cysteine-type endopeptidase activity (GO:0097340)	1-22	0.0533464	0.366463	0	0	21.3312	62.5206	BCL2L12
positive regulation of membrane depolarization (GO:1904181)	1-22	0.0533464	0.366463	0	0	21.3312	62.5206	MLLT11
insulin secretion involved in cellular response to glucose stimulus (GO:0035773)	1-22	0.0533464	0.366463	0	0	21.3312	62.5206	PTPRN2
succinate transport (GO:0015744)	1-22	0.0533464	0.366463	0	0	21.3312	62.5206	SLC25A14
synaptic transmission, dopaminergic (GO:0001963)	1-22	0.0533464	0.366463	0	0	21.3312	62.5206	SLC6A2
positive regulation of striated muscle contraction (GO:0045989)	1-22	0.0533464	0.366463	0	0	21.3312	62.5206	CHGA
tRNA transcription by RNA polymerase III (GO:0042797)	1-22	0.0533464	0.366463	0	0	21.3312	62.5206	POLR2L
mitochondrion-endoplasmic reticulum membrane tethering (GO:1990456)	1-22	0.0533464	0.366463	0	0	21.3312	62.5206	PSEN2
xenobiotic catabolic process (GO:0042178)	1-22	0.0533464	0.366463	0	0	21.3312	62.5206	GSTM1
zinc ion import across plasma membrane (GO:0071578)	1-22	0.0533464	0.366463	0	0	21.3312	62.5206	SLC39A10
lipid transport (GO:0006869)	3-109	0.0537267	0.366463	0	0	3.65113	10.6753	PEX19	PLTP	APOA5
modulation of chemical synaptic transmission (GO:0050804)	3-109	0.0537267	0.366463	0	0	3.65113	10.6753	GRM7	MAPK8IP2	SLC8A2
establishment of protein localization to mitochondrion (GO:0072655)	2-48	0.0539926	0.366463	0	0	5.5895	16.3152	TIMM8B	TOMM40L
regulation of smooth muscle cell proliferation (GO:0048660)	2-49	0.0560095	0.366463	0	0	5.4703	15.7667	IGFBP5	VIP
RNA catabolic process (GO:0006401)	2-49	0.0560095	0.366463	0	0	5.4703	15.7667	LSM5	SIDT2
inner mitochondrial membrane organization (GO:0007007)	2-49	0.0560095	0.366463	0	0	5.4703	15.7667	TIMM8B	TIMM8A
cellular divalent inorganic cation homeostasis (GO:0072503)	3-111	0.0561435	0.366463	0	0	3.58315	10.3189	CALCB	SLC39A10	SLC8A2
regulation of Wnt signaling pathway (GO:0030111)	3-111	0.0561435	0.366463	0	0	3.58315	10.3189	GSKIP	DKK1	WLS
negative regulation of signal transduction (GO:0009968)	5-267	0.0584234	0.366463	0	0	2.47485	7.02867	IGFBP5	NFKBIL1	MAPK8IP2	DKK1	LGMN
cholesterol transport (GO:0030301)	2-51	0.0601211	0.366463	0	0	5.24649	14.7499	STARD3	APOA5
inositol lipid-mediated signaling (GO:0048017)	2-51	0.0601211	0.366463	0	0	5.24649	14.7499	NTRK1	PITPNM2
cellular response to hepatocyte growth factor stimulus (GO:0035729)	1-22	0.0607329	0.366463	0	0	18.2829	51.2155	LGMN
regulation of intestinal cholesterol absorption (GO:0030300)	1-22	0.0607329	0.366463	0	0	18.2829	51.2155	APOA5
neurotransmitter receptor diffusion trapping (GO:0099628)	1-22	0.0607329	0.366463	0	0	18.2829	51.2155	CACNG4
dopamine uptake (GO:0090494)	1-22	0.0607329	0.366463	0	0	18.2829	51.2155	SLC6A2
establishment of protein localization to peroxisome (GO:0072663)	1-22	0.0607329	0.366463	0	0	18.2829	51.2155	PEX19
regulation of striated muscle tissue development (GO:0016202)	1-22	0.0607329	0.366463	0	0	18.2829	51.2155	MTPN
response to hepatocyte growth factor (GO:0035728)	1-22	0.0607329	0.366463	0	0	18.2829	51.2155	LGMN
positive regulation of insulin-like growth factor receptor signaling pathway (GO:0043568)	1-22	0.0607329	0.366463	0	0	18.2829	51.2155	MYORG
positive regulation of lipoprotein lipase activity (GO:0051006)	1-22	0.0607329	0.366463	0	0	18.2829	51.2155	APOA5
self proteolysis (GO:0097264)	1-22	0.0607329	0.366463	0	0	18.2829	51.2155	LGMN
isoprenoid metabolic process (GO:0006720)	1-22	0.0607329	0.366463	0	0	18.2829	51.2155	PDSS1
leukocyte aggregation (GO:0070486)	1-22	0.0607329	0.366463	0	0	18.2829	51.2155	JAM2
mast cell activation involved in immune response (GO:0002279)	1-22	0.0607329	0.366463	0	0	18.2829	51.2155	CHGA
mast cell degranulation (GO:0043303)	1-22	0.0607329	0.366463	0	0	18.2829	51.2155	CHGA
tRNA transcription (GO:0009304)	1-22	0.0607329	0.366463	0	0	18.2829	51.2155	POLR2L
positive regulation of triglyceride catabolic process (GO:0010898)	1-22	0.0607329	0.366463	0	0	18.2829	51.2155	APOA5
postsynapse organization (GO:0099173)	1-22	0.0607329	0.366463	0	0	18.2829	51.2155	LGMN
postsynaptic neurotransmitter receptor diffusion trapping (GO:0098970)	1-22	0.0607329	0.366463	0	0	18.2829	51.2155	CACNG4
monoamine transport (GO:0015844)	1-22	0.0607329	0.366463	0	0	18.2829	51.2155	SLC6A2
glycolipid metabolic process (GO:0006664)	2-52	0.0622148	0.366463	0	0	5.1413	14.2782	PGAP1	NEU1
negative regulation of Wnt signaling pathway (GO:0030178)	4-191	0.0627322	0.366463	0	0	2.76625	7.65943	IGFBP4	FRMD8	DKK1	PSMB9
amyloid-beta formation (GO:0034205)	1-22	0.0680621	0.366463	0	0	15.9968	42.9887	PSEN2
associative learning (GO:0008306)	1-22	0.0680621	0.366463	0	0	15.9968	42.9887	LGMN
ATF6-mediated unfolded protein response (GO:0036500)	1-22	0.0680621	0.366463	0	0	15.9968	42.9887	MBTPS2
CD40 signaling pathway (GO:0023035)	1-22	0.0680621	0.366463	0	0	15.9968	42.9887	TNIP2
negative regulation of pathway-restricted SMAD protein phosphorylation (GO:0060394)	1-22	0.0680621	0.366463	0	0	15.9968	42.9887	DKK1
regulation of ER to Golgi vesicle-mediated transport (GO:0060628)	1-22	0.0680621	0.366463	0	0	15.9968	42.9887	PGAP1
regulation of fibroblast apoptotic process (GO:2000269)	1-22	0.0680621	0.366463	0	0	15.9968	42.9887	PRDM11
Notch receptor processing (GO:0007220)	1-22	0.0680621	0.366463	0	0	15.9968	42.9887	PSEN2
oligosaccharide catabolic process (GO:0009313)	1-22	0.0680621	0.366463	0	0	15.9968	42.9887	NEU1
organic acid catabolic process (GO:0016054)	1-22	0.0680621	0.366463	0	0	15.9968	42.9887	TXN2
peroxisomal transport (GO:0043574)	1-22	0.0680621	0.366463	0	0	15.9968	42.9887	PEX19
peroxisome fission (GO:0016559)	1-22	0.0680621	0.366463	0	0	15.9968	42.9887	PEX19
regulation of sterol biosynthetic process (GO:0106118)	1-22	0.0680621	0.366463	0	0	15.9968	42.9887	MBTPS2
positive regulation of cholesterol esterification (GO:0010873)	1-22	0.0680621	0.366463	0	0	15.9968	42.9887	APOA5
regulation of Wnt signaling pathway, planar cell polarity pathway (GO:2000095)	1-22	0.0680621	0.366463	0	0	15.9968	42.9887	DKK1
hepoxilin biosynthetic process (GO:0051122)	1-22	0.0680621	0.366463	0	0	15.9968	42.9887	GSTM1
hepoxilin metabolic process (GO:0051121)	1-22	0.0680621	0.366463	0	0	15.9968	42.9887	GSTM1
positive regulation of megakaryocyte differentiation (GO:0045654)	1-22	0.0680621	0.366463	0	0	15.9968	42.9887	MTURN
intestinal epithelial cell differentiation (GO:0060575)	1-22	0.0680621	0.366463	0	0	15.9968	42.9887	NPY
sensory organ morphogenesis (GO:0090596)	1-22	0.0680621	0.366463	0	0	15.9968	42.9887	STRA6
isoprenoid biosynthetic process (GO:0008299)	1-22	0.0680621	0.366463	0	0	15.9968	42.9887	PDSS1
skeletal muscle fiber development (GO:0048741)	1-22	0.0680621	0.366463	0	0	15.9968	42.9887	MYORG
lipoprotein metabolic process (GO:0042157)	1-22	0.0680621	0.366463	0	0	15.9968	42.9887	APOA5
synapse pruning (GO:0098883)	1-22	0.0680621	0.366463	0	0	15.9968	42.9887	DKK1
mast cell mediated immunity (GO:0002448)	1-22	0.0680621	0.366463	0	0	15.9968	42.9887	CHGA
positive regulation of triglyceride lipase activity (GO:0061365)	1-22	0.0680621	0.366463	0	0	15.9968	42.9887	APOA5
mitochondrial respirasome assembly (GO:0097250)	1-22	0.0680621	0.366463	0	0	15.9968	42.9887	COX7A2
very-low-density lipoprotein particle remodeling (GO:0034372)	1-22	0.0680621	0.366463	0	0	15.9968	42.9887	APOA5
blood vessel morphogenesis (GO:0048514)	2-56	0.0708303	0.366463	0	0	4.7595	12.6006	LAMA1	STRA6
nuclear-transcribed mRNA catabolic process, deadenylation-dependent decay (GO:0000288)	2-56	0.0708303	0.366463	0	0	4.7595	12.6006	LSM5	LSM3
mitochondrial transport (GO:0006839)	2-56	0.0708303	0.366463	0	0	4.7595	12.6006	TIMM8B	STARD3
regulation of macromolecule metabolic process (GO:0060255)	4-200	0.0716816	0.366463	0	0	2.63802	6.95257	ATXN7L3B	PRDM11	DKK1	SLC8A2
cellular response to peptide (GO:1901653)	2-57	0.0730418	0.366463	0	0	4.67273	12.2272	NTRK1	LGMN
protein targeting (GO:0006605)	3-125	0.0744595	0.366463	0	0	3.16972	8.23335	TIMM8B	ZDHHC18	PEX19
proteolysis (GO:0006508)	5-287	0.0745438	0.366463	0	0	2.29698	5.96381	CPD	PSEN2	NAALAD2	CPE	LGMN
regulation of neurotransmitter receptor activity (GO:0099601)	2-58	0.0752755	0.366463	0	0	4.58905	11.87	MAPK8IP2	CACNG4
eye development (GO:0001654)	2-58	0.0752755	0.366463	0	0	4.58905	11.87	LAMA1	STRA6
RNA modification (GO:0009451)	2-58	0.0752755	0.366463	0	0	4.58905	11.87	URM1	CDKAL1
adrenal gland development (GO:0030325)	1-22	0.0753345	0.366463	0	0	14.2186	36.7668	STRA6
negative regulation of lipopolysaccharide-mediated signaling pathway (GO:0031665)	1-22	0.0753345	0.366463	0	0	14.2186	36.7668	NFKBIL1
nerve growth factor signaling pathway (GO:0038180)	1-22	0.0753345	0.366463	0	0	14.2186	36.7668	NTRK1
nucleic acid transport (GO:0050657)	1-22	0.0753345	0.366463	0	0	14.2186	36.7668	SIDT2
positive regulation of behavior (GO:0048520)	1-22	0.0753345	0.366463	0	0	14.2186	36.7668	STRA6
regulation of tau-protein kinase activity (GO:1902947)	1-22	0.0753345	0.366463	0	0	14.2186	36.7668	DKK1
positive regulation of dendritic spine morphogenesis (GO:0061003)	1-22	0.0753345	0.366463	0	0	14.2186	36.7668	CUX2
glycosphingolipid catabolic process (GO:0046479)	1-22	0.0753345	0.366463	0	0	14.2186	36.7668	NEU1
smooth muscle tissue development (GO:0048745)	1-22	0.0753345	0.366463	0	0	14.2186	36.7668	STRA6
lung epithelium development (GO:0060428)	1-22	0.0753345	0.366463	0	0	14.2186	36.7668	STRA6
sulfur amino acid catabolic process (GO:0000098)	1-22	0.0753345	0.366463	0	0	14.2186	36.7668	TXN2
synapse organization (GO:0050808)	3-126	0.0758581	0.367294	0	0	3.14379	8.10749	ZC4H2	DKK1	SLC8A2
phospholipid transport (GO:0015914)	2-59	0.0775308	0.373655	0	0	4.50832	11.5281	APOA5	PLTP
negative regulation of programmed cell death (GO:0043069)	6-381	0.0783831	0.376022	0	0	2.07669	5.28757	NTRK1	MIEN1	PSEN2	VIP	DKK1	TNFRSF10D
response to organic cyclic compound (GO:0014070)	2-60	0.0798073	0.376908	0	0	4.43036	11.2006	TP53I13	IGFBP5
regulation of cardiac muscle cell differentiation (GO:2000725)	1-22	0.0825504	0.376908	0	0	12.7961	31.918	DKK1
cell differentiation in spinal cord (GO:0021515)	1-22	0.0825504	0.376908	0	0	12.7961	31.918	ZC4H2
columnar/cuboidal epithelial cell differentiation (GO:0002065)	1-22	0.0825504	0.376908	0	0	12.7961	31.918	NPY
regulation of lymphocyte migration (GO:2000401)	1-22	0.0825504	0.376908	0	0	12.7961	31.918	JAM2
regulation of mitochondrial depolarization (GO:0051900)	1-22	0.0825504	0.376908	0	0	12.7961	31.918	MLLT11
erythrocyte development (GO:0048821)	1-22	0.0825504	0.376908	0	0	12.7961	31.918	ALAS1
induction of positive chemotaxis (GO:0050930)	1-22	0.0825504	0.376908	0	0	12.7961	31.918	SCG2
positive regulation of non-canonical Wnt signaling pathway (GO:2000052)	1-22	0.0825504	0.376908	0	0	12.7961	31.918	DKK1
positive regulation of transcription from RNA polymerase II promoter in response to endoplasmic reticulum stress (GO:1990440)	1-22	0.0825504	0.376908	0	0	12.7961	31.918	MBTPS2
myotube cell development (GO:0014904)	1-22	0.0825504	0.376908	0	0	12.7961	31.918	MYORG
cellular response to hypoxia (GO:0071456)	3-131	0.0830239	0.377414	0	0	3.02022	7.5162	ELOC	BACH1	PSMB9
extracellular structure organization (GO:0043062)	4-216	0.0891038	0.378889	0	0	2.43694	5.89241	ADAMTS4	ADAMTS1	LAMA1	JAM2
regulation of cilium assembly (GO:1902017)	2-64	0.0891157	0.378889	0	0	4.1437	10.0187	IFT20	TBC1D7
regulation of extrinsic apoptotic signaling pathway (GO:2001236)	2-64	0.0891157	0.378889	0	0	4.1437	10.0187	BCL2L12	SCG2
tRNA processing (GO:0008033)	2-64	0.0891157	0.378889	0	0	4.1437	10.0187	URM1	CDKAL1
negative regulation of cell division (GO:0051782)	1-22	0.0897105	0.378889	0	0	11.6323	28.0473	TXNIP
negative regulation of cilium assembly (GO:1902018)	1-22	0.0897105	0.378889	0	0	11.6323	28.0473	TBC1D7
regulation of actin filament depolymerization (GO:0030834)	1-22	0.0897105	0.378889	0	0	11.6323	28.0473	MTPN
regulation of alcohol biosynthetic process (GO:1902930)	1-22	0.0897105	0.378889	0	0	11.6323	28.0473	MBTPS2
regulation of cholesterol esterification (GO:0010872)	1-22	0.0897105	0.378889	0	0	11.6323	28.0473	APOA5
P-body assembly (GO:0033962)	1-22	0.0897105	0.378889	0	0	11.6323	28.0473	LSM3
phosphate ion transmembrane transport (GO:0035435)	1-22	0.0897105	0.378889	0	0	11.6323	28.0473	SLC25A14
phospholipid efflux (GO:0033700)	1-22	0.0897105	0.378889	0	0	11.6323	28.0473	APOA5
regulation of sensory perception (GO:0051931)	1-22	0.0897105	0.378889	0	0	11.6323	28.0473	VIP
regulation of triglyceride catabolic process (GO:0010896)	1-22	0.0897105	0.378889	0	0	11.6323	28.0473	APOA5
intrinsic apoptotic signaling pathway in response to oxidative stress (GO:0008631)	1-22	0.0897105	0.378889	0	0	11.6323	28.0473	GSKIP
melanocyte differentiation (GO:0030318)	1-22	0.0897105	0.378889	0	0	11.6323	28.0473	LRMDA
toll-like receptor 3 signaling pathway (GO:0034138)	1-22	0.0897105	0.378889	0	0	11.6323	28.0473	TNIP2
external encapsulating structure organization (GO:0045229)	4-217	0.0902551	0.378889	0	0	2.42538	5.83331	ADAMTS4	ADAMTS1	LAMA1	JAM2
inorganic anion transmembrane transport (GO:0098661)	2-65	0.0914912	0.378889	0	0	4.07772	9.75191	SLC26A2	SLC25A14
tRNA modification (GO:0006400)	2-65	0.0914912	0.378889	0	0	4.07772	9.75191	URM1	CDKAL1
positive regulation of cell death (GO:0010942)	2-66	0.0938852	0.378889	0	0	4.0138	9.49537	NTRK1	DKK1
anion transmembrane transport (GO:0098656)	2-67	0.0962972	0.378889	0	0	3.95185	9.24857	SLC35C2	SLC25A14
positive regulation of catabolic process (GO:0009896)	2-67	0.0962972	0.378889	0	0	3.95185	9.24857	VIP	APOA5
transcription elongation from RNA polymerase II promoter (GO:0006368)	2-67	0.0962972	0.378889	0	0	3.95185	9.24857	ELOC	POLR2L
negative regulation of potassium ion transport (GO:0043267)	1-22	0.096815	0.378889	0	0	10.6624	24.8961	VIP
chondroitin sulfate catabolic process (GO:0030207)	1-22	0.096815	0.378889	0	0	10.6624	24.8961	IDS
regulation of mRNA metabolic process (GO:1903311)	1-22	0.096815	0.378889	0	0	10.6624	24.8961	PTCD2
regulation of nucleocytoplasmic transport (GO:0046822)	1-22	0.096815	0.378889	0	0	10.6624	24.8961	PTPN14
regulation of platelet-derived growth factor receptor signaling pathway (GO:0010640)	1-22	0.096815	0.378889	0	0	10.6624	24.8961	IFT20
regulation of short-term neuronal synaptic plasticity (GO:0048172)	1-22	0.096815	0.378889	0	0	10.6624	24.8961	SLC8A2
relaxation of cardiac muscle (GO:0055119)	1-22	0.096815	0.378889	0	0	10.6624	24.8961	CHGA
positive regulation of fatty acid biosynthetic process (GO:0045723)	1-22	0.096815	0.378889	0	0	10.6624	24.8961	APOA5
high-density lipoprotein particle assembly (GO:0034380)	1-22	0.096815	0.378889	0	0	10.6624	24.8961	APOA5
toll-like receptor 9 signaling pathway (GO:0034162)	1-22	0.096815	0.378889	0	0	10.6624	24.8961	TNIP2
positive regulation of steroid metabolic process (GO:0045940)	1-22	0.096815	0.378889	0	0	10.6624	24.8961	APOA5
triglyceride-rich lipoprotein particle remodeling (GO:0034370)	1-22	0.096815	0.378889	0	0	10.6624	24.8961	APOA5
muscle tissue development (GO:0060537)	1-22	0.096815	0.378889	0	0	10.6624	24.8961	STRA6
DNA-templated transcription, elongation (GO:0006354)	2-69	0.101174	0.380714	0	0	3.83349	8.78221	ELOC	POLR2L
activation of cysteine-type endopeptidase activity (GO:0097202)	1-22	0.103864	0.380714	0	0	9.84169	22.2882	LGMN
amyloid precursor protein catabolic process (GO:0042987)	1-22	0.103864	0.380714	0	0	9.84169	22.2882	PSEN2
quinone biosynthetic process (GO:1901663)	1-22	0.103864	0.380714	0	0	9.84169	22.2882	PDSS1
C4-dicarboxylate transport (GO:0015740)	1-22	0.103864	0.380714	0	0	9.84169	22.2882	SLC25A14
calcium ion import across plasma membrane (GO:0098703)	1-22	0.103864	0.380714	0	0	9.84169	22.2882	SLC8A2
cardiac left ventricle morphogenesis (GO:0003214)	1-22	0.103864	0.380714	0	0	9.84169	22.2882	CPE
negative regulation of smooth muscle cell migration (GO:0014912)	1-22	0.103864	0.380714	0	0	9.84169	22.2882	IGFBP5
ceramide transport (GO:0035627)	1-22	0.103864	0.380714	0	0	9.84169	22.2882	PLTP
regulation of response to endoplasmic reticulum stress (GO:1905897)	1-22	0.103864	0.380714	0	0	9.84169	22.2882	MBTPS2
regulation of sensory perception of pain (GO:0051930)	1-22	0.103864	0.380714	0	0	9.84169	22.2882	VIP
genitalia development (GO:0048806)	1-22	0.103864	0.380714	0	0	9.84169	22.2882	STRA6
positive regulation of long-term synaptic potentiation (GO:1900273)	1-22	0.103864	0.380714	0	0	9.84169	22.2882	LGMN
positive regulation of lymphocyte migration (GO:2000403)	1-22	0.103864	0.380714	0	0	9.84169	22.2882	JAM2
secretion (GO:0046903)	1-22	0.103864	0.380714	0	0	9.84169	22.2882	VIP
positive regulation of potassium ion transmembrane transporter activity (GO:1901018)	1-22	0.103864	0.380714	0	0	9.84169	22.2882	GAL
tRNA wobble base modification (GO:0002097)	1-22	0.103864	0.380714	0	0	9.84169	22.2882	URM1
tRNA wobble uridine modification (GO:0002098)	1-22	0.103864	0.380714	0	0	9.84169	22.2882	URM1
negative regulation of neuron apoptotic process (GO:0043524)	2-71	0.106117	0.381786	0	0	3.722	8.34923	NTRK1	LGMN
phosphatidylinositol-mediated signaling (GO:0048015)	2-71	0.106117	0.381786	0	0	3.722	8.34923	NTRK1	PITPNM2
regulation of aerobic respiration (GO:1903715)	1-22	0.110859	0.381786	0	0	9.13825	20.0995	COX7A2
C21-steroid hormone biosynthetic process (GO:0006700)	1-22	0.110859	0.381786	0	0	9.13825	20.0995	STARD3
calcium ion import into cytosol (GO:1902656)	1-22	0.110859	0.381786	0	0	9.13825	20.0995	SLC8A2
regulation of endothelial cell chemotaxis (GO:2001026)	1-22	0.110859	0.381786	0	0	9.13825	20.0995	LGMN
central nervous system neuron development (GO:0021954)	1-22	0.110859	0.381786	0	0	9.13825	20.0995	NPY
neurotrophin TRK receptor signaling pathway (GO:0048011)	1-22	0.110859	0.381786	0	0	9.13825	20.0995	NTRK1
peptidyl-tyrosine autophosphorylation (GO:0038083)	1-22	0.110859	0.381786	0	0	9.13825	20.0995	NTRK1
G protein-coupled glutamate receptor signaling pathway (GO:0007216)	1-22	0.110859	0.381786	0	0	9.13825	20.0995	GRM7
positive regulation of endothelial cell chemotaxis (GO:2001028)	1-22	0.110859	0.381786	0	0	9.13825	20.0995	LGMN
response to acidic pH (GO:0010447)	1-22	0.110859	0.381786	0	0	9.13825	20.0995	LGMN
ubiquinone biosynthetic process (GO:0006744)	1-22	0.110859	0.381786	0	0	9.13825	20.0995	PDSS1
ubiquinone metabolic process (GO:0006743)	1-22	0.110859	0.381786	0	0	9.13825	20.0995	PDSS1
vitamin D metabolic process (GO:0042359)	1-22	0.110859	0.381786	0	0	9.13825	20.0995	LGMN
myoblast fusion (GO:0007520)	1-22	0.110859	0.381786	0	0	9.13825	20.0995	JAM2
protein kinase A signaling (GO:0010737)	1-22	0.110859	0.381786	0	0	9.13825	20.0995	GAL
regulation of actin filament polymerization (GO:0030833)	2-73	0.111125	0.381786	0	0	3.61679	7.94645	MTPN	PLEKHG2
neurotransmitter transport (GO:0006836)	2-73	0.111125	0.381786	0	0	3.61679	7.94645	PTPRN2	SLC6A2
body fluid secretion (GO:0007589)	1-22	0.1178	0.393043	0	0	8.5286	18.2407	VIP
regulation of ERBB signaling pathway (GO:1901184)	1-22	0.1178	0.393043	0	0	8.5286	18.2407	LGMN
ceramide catabolic process (GO:0046514)	1-22	0.1178	0.393043	0	0	8.5286	18.2407	NEU1
neuron projection organization (GO:0106027)	1-22	0.1178	0.393043	0	0	8.5286	18.2407	LGMN
digestive tract morphogenesis (GO:0048546)	1-22	0.1178	0.393043	0	0	8.5286	18.2407	STRA6
regulation of oxidative phosphorylation (GO:0002082)	1-22	0.1178	0.393043	0	0	8.5286	18.2407	COX7A2
eosinophil chemotaxis (GO:0048245)	1-22	0.1178	0.393043	0	0	8.5286	18.2407	SCG2
eosinophil migration (GO:0072677)	1-22	0.1178	0.393043	0	0	8.5286	18.2407	SCG2
sympathetic nervous system development (GO:0048485)	1-22	0.1178	0.393043	0	0	8.5286	18.2407	NTRK1
cell morphogenesis involved in neuron differentiation (GO:0048667)	2-76	0.11875	0.39369	0	0	3.46964	7.39289	PLPPR4	MAPK8IP2
phospholipid metabolic process (GO:0006644)	2-76	0.11875	0.39369	0	0	3.46964	7.39289	PLPPR2	PLPPR4
cholesterol metabolic process (GO:0008203)	2-77	0.12132	0.395699	0	0	3.4232	7.22065	STARD3	APOA5
positive regulation of endothelial cell proliferation (GO:0001938)	2-77	0.12132	0.395699	0	0	3.4232	7.22065	VIP	SCG2
inorganic cation import across plasma membrane (GO:0098659)	2-77	0.12132	0.395699	0	0	3.4232	7.22065	SLC39A10	SLC8A2
negative regulation of apoptotic signaling pathway (GO:2001234)	2-78	0.123904	0.395699	0	0	3.37799	7.05409	MAPK8IP2	SCG2
pulmonary valve morphogenesis (GO:0003184)	1-22	0.124686	0.395699	0	0	7.99516	16.6456	STRA6
amyloid-beta metabolic process (GO:0050435)	1-22	0.124686	0.395699	0	0	7.99516	16.6456	PSEN2
negative regulation of insulin secretion (GO:0046676)	1-22	0.124686	0.395699	0	0	7.99516	16.6456	CHGA
regulation of cholesterol biosynthetic process (GO:0045540)	1-22	0.124686	0.395699	0	0	7.99516	16.6456	MBTPS2
phosphate ion transport (GO:0006817)	1-22	0.124686	0.395699	0	0	7.99516	16.6456	SLC25A14
positive regulation of macrophage activation (GO:0043032)	1-22	0.124686	0.395699	0	0	7.99516	16.6456	TNIP2
positive regulation of muscle hypertrophy (GO:0014742)	1-22	0.124686	0.395699	0	0	7.99516	16.6456	MTPN
positive regulation of positive chemotaxis (GO:0050927)	1-22	0.124686	0.395699	0	0	7.99516	16.6456	SCG2
mitochondrial electron transport, cytochrome c to oxygen (GO:0006123)	1-22	0.124686	0.395699	0	0	7.99516	16.6456	COX7C
vasculature development (GO:0001944)	1-22	0.124686	0.395699	0	0	7.99516	16.6456	STRA6
organonitrogen compound biosynthetic process (GO:1901566)	3-158	0.126262	0.395699	0	0	2.4907	5.15426	GSTM1	ALAS1	PAM
axon development (GO:0061564)	2-79	0.126501	0.395699	0	0	3.33395	6.89296	GRM7	PLPPR4
negative regulation of NF-kappaB transcription factor activity (GO:0032088)	2-79	0.126501	0.395699	0	0	3.33395	6.89296	NFKBIL1	MTURN
regulation of neuron differentiation (GO:0045664)	2-79	0.126501	0.395699	0	0	3.33395	6.89296	ZC4H2	DKK1
regulation of apoptotic process (GO:0042981)	9-742	0.126755	0.395699	0	0	1.59626	3.29708	MLLT11	NTRK1	PLEKHG2	MIEN1	PSEN2	TMEM219	VIP	DKK1	TNFRSF10D
pulmonary valve development (GO:0003177)	1-22	0.13152	0.395699	0	0	7.52448	15.2642	STRA6
amyloid precursor protein metabolic process (GO:0042982)	1-22	0.13152	0.395699	0	0	7.52448	15.2642	PSEN2
carbohydrate derivative transport (GO:1901264)	1-22	0.13152	0.395699	0	0	7.52448	15.2642	PLTP
negative regulation of peptide hormone secretion (GO:0090278)	1-22	0.13152	0.395699	0	0	7.52448	15.2642	CHGA
positive chemotaxis (GO:0050918)	1-22	0.13152	0.395699	0	0	7.52448	15.2642	SCG2
positive regulation of cardiac muscle hypertrophy (GO:0010613)	1-22	0.13152	0.395699	0	0	7.52448	15.2642	MTPN
regulation of transcription by RNA polymerase I (GO:0006356)	1-22	0.13152	0.395699	0	0	7.52448	15.2642	POLR2L
positive regulation of excitatory postsynaptic potential (GO:2000463)	1-22	0.13152	0.395699	0	0	7.52448	15.2642	CUX2
positive regulation of fatty acid metabolic process (GO:0045923)	1-22	0.13152	0.395699	0	0	7.52448	15.2642	APOA5
high-density lipoprotein particle remodeling (GO:0034375)	1-22	0.13152	0.395699	0	0	7.52448	15.2642	PLTP
leukocyte tethering or rolling (GO:0050901)	1-22	0.13152	0.395699	0	0	7.52448	15.2642	JAM2
positive regulation of synaptic transmission, glutamatergic (GO:0051968)	1-22	0.13152	0.395699	0	0	7.52448	15.2642	CACNG4
prostanoid metabolic process (GO:0006692)	1-22	0.13152	0.395699	0	0	7.52448	15.2642	GSTM1
RNA splicing, via transesterification reactions with bulged adenosine as nucleophile (GO:0000377)	4-251	0.133444	0.399917	0	0	2.0879	4.20518	SF3B5	LSM5	LSM3	POLR2L
positive regulation of signal transduction (GO:0009967)	4-252	0.134825	0.399917	0	0	2.07937	4.16659	TSPAN14	CUX2	MYORG	WLS
aspartate family amino acid metabolic process (GO:0009066)	1-22	0.1383	0.399917	0	0	7.10609	14.0582	NAALAD2
negative regulation of striated muscle cell differentiation (GO:0051154)	1-22	0.1383	0.399917	0	0	7.10609	14.0582	DKK1
neuromuscular process (GO:0050905)	1-22	0.1383	0.399917	0	0	7.10609	14.0582	STRA6
regulation of nervous system process (GO:0031644)	1-22	0.1383	0.399917	0	0	7.10609	14.0582	SLC8A2
excitatory postsynaptic potential (GO:0060079)	1-22	0.1383	0.399917	0	0	7.10609	14.0582	MAPK8IP2
positive regulation of G protein-coupled receptor signaling pathway (GO:0045745)	1-22	0.1383	0.399917	0	0	7.10609	14.0582	CHGA
positive regulation of leukocyte activation (GO:0002696)	1-22	0.1383	0.399917	0	0	7.10609	14.0582	TNIP2
positive regulation of monocyte chemotaxis (GO:0090026)	1-22	0.1383	0.399917	0	0	7.10609	14.0582	LGMN
leukocyte adhesion to vascular endothelial cell (GO:0061756)	1-22	0.1383	0.399917	0	0	7.10609	14.0582	JAM2
positive regulation of triglyceride metabolic process (GO:0090208)	1-22	0.1383	0.399917	0	0	7.10609	14.0582	APOA5
protein import into mitochondrial matrix (GO:0030150)	1-22	0.1383	0.399917	0	0	7.10609	14.0582	TOMM40L
N-glycan processing (GO:0006491)	1-22	0.1383	0.399917	0	0	7.10609	14.0582	MGAT4B
regulation of neuron death (GO:1901214)	2-86	0.145025	0.401839	0	0	3.05504	5.89883	CHGA	DKK1
cardiac ventricle development (GO:0003231)	1-22	0.145027	0.401839	0	0	6.73175	12.9979	STRA6
embryonic digestive tract development (GO:0048566)	1-22	0.145027	0.401839	0	0	6.73175	12.9979	STRA6
establishment of epithelial cell polarity (GO:0090162)	1-22	0.145027	0.401839	0	0	6.73175	12.9979	FBF1
regulation of smooth muscle cell migration (GO:0014910)	1-22	0.145027	0.401839	0	0	6.73175	12.9979	IGFBP5
ganglioside metabolic process (GO:0001573)	1-22	0.145027	0.401839	0	0	6.73175	12.9979	NEU1
positive regulation of dendrite morphogenesis (GO:0050775)	1-22	0.145027	0.401839	0	0	6.73175	12.9979	CUX2
positive regulation of heart contraction (GO:0045823)	1-22	0.145027	0.401839	0	0	6.73175	12.9979	CHGA
positive regulation of nitrogen compound metabolic process (GO:0051173)	1-22	0.145027	0.401839	0	0	6.73175	12.9979	MTPN
mitochondrial cytochrome c oxidase assembly (GO:0033617)	1-22	0.145027	0.401839	0	0	6.73175	12.9979	COA5
myeloid cell development (GO:0061515)	1-22	0.145027	0.401839	0	0	6.73175	12.9979	ALAS1
protein targeting to membrane (GO:0006612)	2-87	0.147716	0.401839	0	0	3.01895	5.77363	ZDHHC18	PEX19
sodium ion transmembrane transport (GO:0035725)	2-87	0.147716	0.401839	0	0	3.01895	5.77363	SLC6A2	SLC8A2
negative regulation of binding (GO:0051100)	2-88	0.150417	0.401839	0	0	2.98369	5.65213	PEX19	DKK1
retrograde transport, endosome to Golgi (GO:0042147)	2-88	0.150417	0.401839	0	0	2.98369	5.65213	TMEM87A	TMEM87B
sensory perception of mechanical stimulus (GO:0050954)	2-88	0.150417	0.401839	0	0	2.98369	5.65213	TIMM8B	GRM7
positive regulation of neuron projection development (GO:0010976)	2-88	0.150417	0.401839	0	0	2.98369	5.65213	NTRK1	CUX2
metal ion transport (GO:0030001)	2-88	0.150417	0.401839	0	0	2.98369	5.65213	PSEN2	SLC8A2
aerobic respiration (GO:0009060)	1-22	0.151703	0.401839	0	0	6.39484	12.0596	SLC25A14
purinergic nucleotide receptor signaling pathway (GO:0035590)	1-22	0.151703	0.401839	0	0	6.39484	12.0596	TXNIP
anterior/posterior axis specification (GO:0009948)	1-22	0.151703	0.401839	0	0	6.39484	12.0596	WLS
autonomic nervous system development (GO:0048483)	1-22	0.151703	0.401839	0	0	6.39484	12.0596	NTRK1
regulation of cholesterol metabolic process (GO:0090181)	1-22	0.151703	0.401839	0	0	6.39484	12.0596	MBTPS2
negative regulation of peptidyl-serine phosphorylation (GO:0033137)	1-22	0.151703	0.401839	0	0	6.39484	12.0596	DKK1
neurotrophin signaling pathway (GO:0038179)	1-22	0.151703	0.401839	0	0	6.39484	12.0596	NTRK1
regulation of lipid catabolic process (GO:0050994)	1-22	0.151703	0.401839	0	0	6.39484	12.0596	APOA5
regulation of lipopolysaccharide-mediated signaling pathway (GO:0031664)	1-22	0.151703	0.401839	0	0	6.39484	12.0596	NFKBIL1
regulation of lipoprotein lipase activity (GO:0051004)	1-22	0.151703	0.401839	0	0	6.39484	12.0596	APOA5
positive regulation of antigen receptor-mediated signaling pathway (GO:0050857)	1-22	0.151703	0.401839	0	0	6.39484	12.0596	SLC39A10
sterol transport (GO:0015918)	1-22	0.151703	0.401839	0	0	6.39484	12.0596	STARD3
long-term synaptic potentiation (GO:0060291)	1-22	0.151703	0.401839	0	0	6.39484	12.0596	SLC8A2
zinc ion transport (GO:0006829)	1-22	0.151703	0.401839	0	0	6.39484	12.0596	SLC39A3
myotube differentiation (GO:0014902)	1-22	0.151703	0.401839	0	0	6.39484	12.0596	JAM2
regulation of cation channel activity (GO:2001257)	2-89	0.153128	0.403622	0	0	2.94925	5.5342	MAPK8IP2	CACNG4
negative regulation of cellular process (GO:0048523)	7-566	0.154549	0.403622	0	0	1.62076	3.02636	NTRK1	TP53I13	ADAMTS1	TXNIP	PRDM11	PTPN14	JAM2
sodium ion transport (GO:0006814)	2-90	0.155849	0.403622	0	0	2.91558	5.41968	SLC6A2	SLC8A2
negative regulation of DNA recombination at telomere (GO:0048239)	1-22	0.158327	0.403622	0	0	6.09002	11.2245	POLR2L
regulation of DNA recombination at telomere (GO:0072695)	1-22	0.158327	0.403622	0	0	6.09002	11.2245	POLR2L
cellular response to nerve growth factor stimulus (GO:1990090)	1-22	0.158327	0.403622	0	0	6.09002	11.2245	NTRK1
positive regulation of dendritic spine development (GO:0060999)	1-22	0.158327	0.403622	0	0	6.09002	11.2245	CUX2
regulation of vacuole organization (GO:0044088)	1-22	0.158327	0.403622	0	0	6.09002	11.2245	IFT20
glutathione derivative biosynthetic process (GO:1901687)	1-22	0.158327	0.403622	0	0	6.09002	11.2245	GSTM1
glutathione derivative metabolic process (GO:1901685)	1-22	0.158327	0.403622	0	0	6.09002	11.2245	GSTM1
heme biosynthetic process (GO:0006783)	1-22	0.158327	0.403622	0	0	6.09002	11.2245	ALAS1
positive regulation of lipid catabolic process (GO:0050996)	1-22	0.158327	0.403622	0	0	6.09002	11.2245	APOA5
proteasomal ubiquitin-independent protein catabolic process (GO:0010499)	1-22	0.158327	0.403622	0	0	6.09002	11.2245	PSMB9
protein import into peroxisome membrane (GO:0045046)	1-22	0.158327	0.403622	0	0	6.09002	11.2245	PEX19
sensory perception of sound (GO:0007605)	2-91	0.158579	0.403622	0	0	2.88268	5.30845	TIMM8B	GRM7
toll-like receptor signaling pathway (GO:0002224)	2-91	0.158579	0.403622	0	0	2.88268	5.30845	TNIP2	LGMN
regulation of endothelial cell proliferation (GO:0001936)	2-92	0.161319	0.404858	0	0	2.85051	5.20039	VIP	SCG2
Wnt signaling pathway (GO:0016055)	2-92	0.161319	0.404858	0	0	2.85051	5.20039	CPE	WLS
artery development (GO:0060840)	1-22	0.164899	0.404858	0	0	5.8129	10.4773	STRA6
regulation of B cell receptor signaling pathway (GO:0050855)	1-22	0.164899	0.404858	0	0	5.8129	10.4773	SLC39A10
regulation of calcium ion transmembrane transport (GO:1903169)	1-22	0.164899	0.404858	0	0	5.8129	10.4773	PSEN2
regulation of cysteine-type endopeptidase activity (GO:2000116)	1-22	0.164899	0.404858	0	0	5.8129	10.4773	PSMB9
cilium-dependent cell motility (GO:0060285)	1-22	0.164899	0.404858	0	0	5.8129	10.4773	DNAH3
peptidyl-L-cysteine S-palmitoylation (GO:0018230)	1-22	0.164899	0.404858	0	0	5.8129	10.4773	ZDHHC18
peptidyl-S-diacylglycerol-L-cysteine biosynthetic process from peptidyl-cysteine (GO:0018231)	1-22	0.164899	0.404858	0	0	5.8129	10.4773	ZDHHC18
regulation of protein export from nucleus (GO:0046825)	1-22	0.164899	0.404858	0	0	5.8129	10.4773	PTPN14
positive regulation of cholesterol efflux (GO:0010875)	1-22	0.164899	0.404858	0	0	5.8129	10.4773	PLTP
respiratory chain complex IV assembly (GO:0008535)	1-22	0.164899	0.404858	0	0	5.8129	10.4773	COA5
positive regulation of JUN kinase activity (GO:0043507)	1-22	0.164899	0.404858	0	0	5.8129	10.4773	DKK1
membrane protein ectodomain proteolysis (GO:0006509)	1-22	0.164899	0.404858	0	0	5.8129	10.4773	PSEN2
triglyceride catabolic process (GO:0019433)	1-22	0.164899	0.404858	0	0	5.8129	10.4773	APOA5
inorganic cation transmembrane transport (GO:0098662)	4-274	0.166631	0.405754	0	0	1.9078	3.41872	SLC6A2	SLC25A14	SLC8A2	SLC39A3
mRNA splicing, via spliceosome (GO:0000398)	4-274	0.166631	0.405754	0	0	1.9078	3.41872	SF3B5	LSM5	LSM3	POLR2L
negative regulation of cellular protein metabolic process (GO:0032269)	2-94	0.166823	0.405754	0	0	2.78826	4.99327	DNAJC1	IGFBP5
interleukin-1-mediated signaling pathway (GO:0070498)	2-94	0.166823	0.405754	0	0	2.78826	4.99327	TNIP2	PSMB9
mRNA metabolic process (GO:0016071)	2-95	0.169587	0.406186	0	0	2.75813	4.894	LSM5	LSM3
regulation of cardiac muscle hypertrophy (GO:0010611)	1-22	0.17142	0.406186	0	0	5.55989	9.80563	MTPN
C21-steroid hormone metabolic process (GO:0008207)	1-22	0.17142	0.406186	0	0	5.55989	9.80563	STARD3
regulation of cell size (GO:0008361)	1-22	0.17142	0.406186	0	0	5.55989	9.80563	MTPN
negative regulation of ossification (GO:0030279)	1-22	0.17142	0.406186	0	0	5.55989	9.80563	DKK1
neuromuscular junction development (GO:0007528)	1-22	0.17142	0.406186	0	0	5.55989	9.80563	ZC4H2
cholesterol efflux (GO:0033344)	1-22	0.17142	0.406186	0	0	5.55989	9.80563	APOA5
endocrine system development (GO:0035270)	1-22	0.17142	0.406186	0	0	5.55989	9.80563	STRA6
porphyrin-containing compound biosynthetic process (GO:0006779)	1-22	0.17142	0.406186	0	0	5.55989	9.80563	ALAS1
sulfur amino acid metabolic process (GO:0000096)	1-22	0.17142	0.406186	0	0	5.55989	9.80563	TXN2
positive regulation of transcription from RNA polymerase II promoter in response to stress (GO:0036003)	1-22	0.17142	0.406186	0	0	5.55989	9.80563	MBTPS2
negative regulation of cell population proliferation (GO:0008285)	5-379	0.175073	0.406186	0	0	1.7238	3.00382	NTRK1	IGFBP5	ADAMTS1	VIP	PTPN14
calcium ion homeostasis (GO:0055074)	2-97	0.175139	0.406186	0	0	2.69979	4.70352	CALCB	SLC8A2
3'-phosphoadenosine 5'-phosphosulfate metabolic process (GO:0050427)	1-22	0.177891	0.406186	0	0	5.32796	9.19917	SLC26A2
acylglycerol homeostasis (GO:0055090)	1-22	0.177891	0.406186	0	0	5.32796	9.19917	APOA5
receptor catabolic process (GO:0032801)	1-22	0.177891	0.406186	0	0	5.32796	9.19917	LGMN
regulation of calcium ion import (GO:0090279)	1-22	0.177891	0.406186	0	0	5.32796	9.19917	PSEN2
negative regulation of ion transport (GO:0043271)	1-22	0.177891	0.406186	0	0	5.32796	9.19917	VIP
cAMP-mediated signaling (GO:0019933)	1-22	0.177891	0.406186	0	0	5.32796	9.19917	GAL
regulation of cholesterol transport (GO:0032374)	1-22	0.177891	0.406186	0	0	5.32796	9.19917	APOA5
chemical synaptic transmission, postsynaptic (GO:0099565)	1-22	0.177891	0.406186	0	0	5.32796	9.19917	MAPK8IP2
organophosphate ester transport (GO:0015748)	1-22	0.177891	0.406186	0	0	5.32796	9.19917	PLTP
peroxisome organization (GO:0007031)	1-22	0.177891	0.406186	0	0	5.32796	9.19917	PEX19
energy derivation by oxidation of organic compounds (GO:0015980)	1-22	0.177891	0.406186	0	0	5.32796	9.19917	NDUFS4
fat-soluble vitamin metabolic process (GO:0006775)	1-22	0.177891	0.406186	0	0	5.32796	9.19917	LGMN
positive regulation of lipid metabolic process (GO:0045834)	1-22	0.177891	0.406186	0	0	5.32796	9.19917	APOA5
positive regulation of release of cytochrome c from mitochondria (GO:0090200)	1-22	0.177891	0.406186	0	0	5.32796	9.19917	MLLT11
regulation of neuron apoptotic process (GO:0043523)	2-98	0.177926	0.406186	0	0	2.67154	4.61211	NTRK1	LGMN
regulation of monocyte chemotaxis (GO:0090025)	1-22	0.184311	0.415299	0	0	5.11458	8.64942	LGMN
organelle fission (GO:0048285)	1-22	0.184311	0.415299	0	0	5.11458	8.64942	PEX19
regulation of myelination (GO:0031641)	1-22	0.184311	0.415299	0	0	5.11458	8.64942	JAM2
positive regulation of filopodium assembly (GO:0051491)	1-22	0.184311	0.415299	0	0	5.11458	8.64942	MIEN1
positive regulation of G1/S transition of mitotic cell cycle (GO:1900087)	1-22	0.184311	0.415299	0	0	5.11458	8.64942	ADAMTS1
positive regulation of viral transcription (GO:0050434)	1-22	0.184311	0.415299	0	0	5.11458	8.64942	POLR2L
positive regulation of programmed cell death (GO:0043068)	4-286	0.185014	0.415981	0	0	1.82549	3.0802	MLLT11	NTRK1	PLEKHG2	PSEN2
intrinsic apoptotic signaling pathway (GO:0097193)	2-102	0.18914	0.420685	0	0	2.56416	4.27001	MLLT11	GSKIP
negative regulation of plasma membrane bounded cell projection assembly (GO:0120033)	1-22	0.190682	0.420685	0	0	4.91762	8.14922	TBC1D7
dendritic spine organization (GO:0097061)	1-22	0.190682	0.420685	0	0	4.91762	8.14922	LGMN
peroxisomal membrane transport (GO:0015919)	1-22	0.190682	0.420685	0	0	4.91762	8.14922	PEX19
regulation of toll-like receptor signaling pathway (GO:0034121)	1-22	0.190682	0.420685	0	0	4.91762	8.14922	NFKBIL1
positive regulation of mitotic cell cycle (GO:0045931)	1-22	0.190682	0.420685	0	0	4.91762	8.14922	LGMN
stress-activated protein kinase signaling cascade (GO:0031098)	1-22	0.190682	0.420685	0	0	4.91762	8.14922	TNIP2
regulation of programmed cell death (GO:0043067)	3-194	0.193377	0.420685	0	0	2.01755	3.31507	NTRK1	TMEM219	TNFRSF10D
cellular metal ion homeostasis (GO:0006875)	2-104	0.194783	0.420685	0	0	2.51362	4.11196	CALCB	SLC8A2
steroid metabolic process (GO:0008202)	2-104	0.194783	0.420685	0	0	2.51362	4.11196	STARD3	LGMN
amide transport (GO:0042886)	1-22	0.197003	0.420685	0	0	4.73524	7.69258	PLTP
regulation of B cell activation (GO:0050864)	1-22	0.197003	0.420685	0	0	4.73524	7.69258	TNIP2
regulation of calcium-mediated signaling (GO:0050848)	1-22	0.197003	0.420685	0	0	4.73524	7.69258	SLC8A2
cellular zinc ion homeostasis (GO:0006882)	1-22	0.197003	0.420685	0	0	4.73524	7.69258	SLC39A10
cytosolic calcium ion transport (GO:0060401)	1-22	0.197003	0.420685	0	0	4.73524	7.69258	SLC8A2
regulation of protein transport (GO:0051223)	1-22	0.197003	0.420685	0	0	4.73524	7.69258	DNAJC1
positive regulation of cell communication (GO:0010647)	1-22	0.197003	0.420685	0	0	4.73524	7.69258	WLS
positive regulation of fibroblast proliferation (GO:0048146)	1-22	0.197003	0.420685	0	0	4.73524	7.69258	NDUFS4
GPI anchor metabolic process (GO:0006505)	1-22	0.197003	0.420685	0	0	4.73524	7.69258	PGAP1
sulfur compound transport (GO:0072348)	1-22	0.197003	0.420685	0	0	4.73524	7.69258	SLC25A14
macromolecule catabolic process (GO:0009057)	1-22	0.197003	0.420685	0	0	4.73524	7.69258	LGMN
transcription by RNA polymerase III (GO:0006383)	1-22	0.197003	0.420685	0	0	4.73524	7.69258	POLR2L
positive regulation of synapse assembly (GO:0051965)	1-22	0.197003	0.420685	0	0	4.73524	7.69258	CUX2
protein localization to Golgi apparatus (GO:0034067)	1-22	0.197003	0.420685	0	0	4.73524	7.69258	IFT20
regulation of JNK cascade (GO:0046328)	2-105	0.197613	0.420685	0	0	2.48909	4.03593	MAPK8IP2	MTURN
mitochondrial translation (GO:0032543)	2-105	0.197613	0.420685	0	0	2.48909	4.03593	MRPL41	NDUFA7
protein targeting to peroxisome (GO:0006625)	1-22	0.203275	0.426632	0	0	4.5659	7.27436	PEX19
regulation of actin polymerization or depolymerization (GO:0008064)	1-22	0.203275	0.426632	0	0	4.5659	7.27436	PLEKHG2
negative regulation of mRNA catabolic process (GO:1902373)	1-22	0.203275	0.426632	0	0	4.5659	7.27436	VIP
regulation of fatty acid biosynthetic process (GO:0042304)	1-22	0.203275	0.426632	0	0	4.5659	7.27436	APOA5
regulation of neuronal synaptic plasticity (GO:0048168)	1-22	0.203275	0.426632	0	0	4.5659	7.27436	SLC8A2
response to zinc ion (GO:0010043)	1-22	0.203275	0.426632	0	0	4.5659	7.27436	PAM
limb development (GO:0060173)	1-22	0.203275	0.426632	0	0	4.5659	7.27436	DKK1
extracellular matrix organization (GO:0030198)	4-300	0.20725	0.428464	0	0	1.73791	2.73517	ADAMTS4	ADAMTS1	LAMA1	JAM2
mRNA processing (GO:0006397)	4-300	0.20725	0.428464	0	0	1.73791	2.73517	SF3B5	LSM5	LSM3	POLR2L
artery morphogenesis (GO:0048844)	1-22	0.209499	0.428464	0	0	4.40823	6.89023	STRA6
regulation of catecholamine secretion (GO:0050433)	1-22	0.209499	0.428464	0	0	4.40823	6.89023	CHGA
chondroitin sulfate metabolic process (GO:0030204)	1-22	0.209499	0.428464	0	0	4.40823	6.89023	IDS
regulation of long-term synaptic potentiation (GO:1900271)	1-22	0.209499	0.428464	0	0	4.40823	6.89023	LGMN
regulation of macrophage activation (GO:0043030)	1-22	0.209499	0.428464	0	0	4.40823	6.89023	TNIP2
respiratory tube development (GO:0030323)	1-22	0.209499	0.428464	0	0	4.40823	6.89023	STRA6
long-chain fatty acid biosynthetic process (GO:0042759)	1-22	0.209499	0.428464	0	0	4.40823	6.89023	GSTM1
maintenance of blood-brain barrier (GO:0035633)	1-22	0.209499	0.428464	0	0	4.40823	6.89023	JAM2
termination of RNA polymerase I transcription (GO:0006363)	1-22	0.209499	0.428464	0	0	4.40823	6.89023	POLR2L
positive regulation of small GTPase mediated signal transduction (GO:0051057)	1-22	0.209499	0.428464	0	0	4.40823	6.89023	NTRK1
zinc ion homeostasis (GO:0055069)	1-22	0.209499	0.428464	0	0	4.40823	6.89023	SLC39A10
MAPK cascade (GO:0000165)	4-303	0.212115	0.429972	0	0	1.72021	2.6674	TNIP2	RGL3	SCG2	PSMB9
protein palmitoylation (GO:0018345)	1-22	0.215674	0.429972	0	0	4.26108	6.53644	ZDHHC18
aminoglycan catabolic process (GO:0006026)	1-22	0.215674	0.429972	0	0	4.26108	6.53644	IDS
regulation of cellular component size (GO:0032535)	1-22	0.215674	0.429972	0	0	4.26108	6.53644	MTPN
cellular response to cAMP (GO:0071320)	1-22	0.215674	0.429972	0	0	4.26108	6.53644	IGFBP5
negative regulation of response to biotic stimulus (GO:0002832)	1-22	0.215674	0.429972	0	0	4.26108	6.53644	NFKBIL1
regulation of potassium ion transport (GO:0043266)	1-22	0.215674	0.429972	0	0	4.26108	6.53644	VIP
steroid hormone biosynthetic process (GO:0120178)	1-22	0.215674	0.429972	0	0	4.26108	6.53644	STARD3
triglyceride homeostasis (GO:0070328)	1-22	0.215674	0.429972	0	0	4.26108	6.53644	APOA5
prostaglandin metabolic process (GO:0006693)	1-22	0.215674	0.429972	0	0	4.26108	6.53644	GSTM1
positive regulation of cellular process (GO:0048522)	7-625	0.216551	0.429972	0	0	1.46155	2.23606	MTPN	LMAN2	GID8	VIP	DKK1	LGMN	TSPAN31
chemical synaptic transmission (GO:0007268)	4-306	0.217011	0.429972	0	0	1.70286	2.60164	PTPRN2	GRM7	NPY	SLC6A2
phosphatidylinositol metabolic process (GO:0046488)	2-112	0.21755	0.429972	0	0	2.32987	3.55381	PGAP1	PITPNM2
sulfur compound biosynthetic process (GO:0044272)	2-113	0.220414	0.429972	0	0	2.30876	3.49142	SLC26A2	GSTM1
7-methylguanosine mRNA capping (GO:0006370)	1-32	0.221801	0.429972	0	0	4.12341	6.20975	POLR2L
7-methylguanosine RNA capping (GO:0009452)	1-32	0.221801	0.429972	0	0	4.12341	6.20975	POLR2L
protein transmembrane import into intracellular organelle (GO:0044743)	1-32	0.221801	0.429972	0	0	4.12341	6.20975	TOMM40L
regulation of cellular amide metabolic process (GO:0034248)	1-32	0.221801	0.429972	0	0	4.12341	6.20975	MTPN
regulation of dendrite morphogenesis (GO:0048814)	1-32	0.221801	0.429972	0	0	4.12341	6.20975	CUX2
regulation of dendritic spine morphogenesis (GO:0061001)	1-32	0.221801	0.429972	0	0	4.12341	6.20975	CUX2
cellular response to glucose stimulus (GO:0071333)	1-32	0.221801	0.429972	0	0	4.12341	6.20975	PTPRN2
regulation of intracellular protein transport (GO:0033157)	1-32	0.221801	0.429972	0	0	4.12341	6.20975	PTPN14
regulation of NMDA receptor activity (GO:2000310)	1-32	0.221801	0.429972	0	0	4.12341	6.20975	MAPK8IP2
regulation of transcription involved in G1/S transition of mitotic cell cycle (GO:0000083)	1-32	0.221801	0.429972	0	0	4.12341	6.20975	BACH1
GPI anchor biosynthetic process (GO:0006506)	1-32	0.221801	0.429972	0	0	4.12341	6.20975	PGAP1
skeletal muscle organ development (GO:0060538)	1-32	0.221801	0.429972	0	0	4.12341	6.20975	STRA6
membrane depolarization (GO:0051899)	1-32	0.221801	0.429972	0	0	4.12341	6.20975	CACNG4
transcription initiation from RNA polymerase I promoter (GO:0006361)	1-32	0.221801	0.429972	0	0	4.12341	6.20975	POLR2L
positive regulation of apoptotic process (GO:0043065)	4-310	0.223588	0.43263	0	0	1.68025	2.51694	MLLT11	PLEKHG2	PSEN2	PRDM11
calcium ion transport (GO:0006816)	2-115	0.226151	0.43436	0	0	2.26767	3.37101	PSEN2	SLC8A2
cellular amide metabolic process (GO:0043603)	2-115	0.226151	0.43436	0	0	2.26767	3.37101	CPD	CPE
cellular response to molecule of bacterial origin (GO:0071219)	2-115	0.226151	0.43436	0	0	2.26767	3.37101	TNIP2	NFKBIL1
positive regulation of protein metabolic process (GO:0051247)	2-115	0.226151	0.43436	0	0	2.26767	3.37101	MTPN	VIP
regulation of cholesterol efflux (GO:0010874)	1-33	0.227881	0.435273	0	0	3.99435	5.90738	PLTP
positive regulation of cholesterol transport (GO:0032376)	1-33	0.227881	0.435273	0	0	3.99435	5.90738	PLTP
RNA stabilization (GO:0043489)	1-33	0.227881	0.435273	0	0	3.99435	5.90738	VIP
cytosolic transport (GO:0016482)	2-116	0.229024	0.435857	0	0	2.24766	3.3129	TMEM87A	TMEM87B
ion transport (GO:0006811)	2-116	0.229024	0.435857	0	0	2.24766	3.3129	SLC26A2	SLC8A2
organelle organization (GO:0006996)	5-420	0.231104	0.439012	0	0	1.55023	2.27091	CHGA	ALAS1	PTCD2	PEX19	LMAN2
positive regulation of cell projection organization (GO:0031346)	2-117	0.231899	0.439721	0	0	2.22801	3.25613	NTRK1	CUX2
secondary alcohol biosynthetic process (GO:1902653)	1-34	0.233913	0.440449	0	0	3.87312	5.62689	APOA5
transcription by RNA polymerase I (GO:0006360)	1-34	0.233913	0.440449	0	0	3.87312	5.62689	POLR2L
adenylate cyclase-activating G protein-coupled receptor signaling pathway (GO:0007189)	2-118	0.234776	0.440449	0	0	2.20869	3.20066	CALCB	VIP
acylglycerol catabolic process (GO:0046464)	1-35	0.239899	0.440449	0	0	3.75901	5.36613	APOA5
regulation of autophagosome assembly (GO:2000785)	1-35	0.239899	0.440449	0	0	3.75901	5.36613	IFT20
negative regulation of organelle assembly (GO:1902116)	1-35	0.239899	0.440449	0	0	3.75901	5.36613	TBC1D7
cholesterol biosynthetic process (GO:0006695)	1-35	0.239899	0.440449	0	0	3.75901	5.36613	APOA5
regulation of JUN kinase activity (GO:0043506)	1-35	0.239899	0.440449	0	0	3.75901	5.36613	DKK1
regulation of lipid biosynthetic process (GO:0046890)	1-35	0.239899	0.440449	0	0	3.75901	5.36613	APOA5
regulation of postsynaptic membrane potential (GO:0060078)	1-35	0.239899	0.440449	0	0	3.75901	5.36613	MAPK8IP2
regulation of protein polymerization (GO:0032271)	1-35	0.239899	0.440449	0	0	3.75901	5.36613	PLEKHG2
positive regulation of cell cycle G1/S phase transition (GO:1902808)	1-35	0.239899	0.440449	0	0	3.75901	5.36613	ADAMTS1
respiratory system development (GO:0060541)	1-35	0.239899	0.440449	0	0	3.75901	5.36613	STRA6
positive regulation of lipid biosynthetic process (GO:0046889)	1-35	0.239899	0.440449	0	0	3.75901	5.36613	APOA5
positive regulation of lymphocyte activation (GO:0051251)	1-35	0.239899	0.440449	0	0	3.75901	5.36613	TNIP2
lung development (GO:0030324)	1-35	0.239899	0.440449	0	0	3.75901	5.36613	STRA6
positive regulation of reproductive process (GO:2000243)	1-35	0.239899	0.440449	0	0	3.75901	5.36613	VIP
protein localization to cilium (GO:0061512)	1-35	0.239899	0.440449	0	0	3.75901	5.36613	IFT20
cellular response to lipopolysaccharide (GO:0071222)	2-120	0.240538	0.440845	0	0	2.17103	3.09346	TNIP2	NFKBIL1
regulation of cardiac muscle contraction (GO:0055117)	1-36	0.245838	0.444301	0	0	3.65143	5.12325	CHGA
negative regulation of toll-like receptor signaling pathway (GO:0034122)	1-36	0.245838	0.444301	0	0	3.65143	5.12325	NFKBIL1
cyclic-nucleotide-mediated signaling (GO:0019935)	1-36	0.245838	0.444301	0	0	3.65143	5.12325	GAL
dendrite morphogenesis (GO:0048813)	1-36	0.245838	0.444301	0	0	3.65143	5.12325	MAPK8IP2
regulation of mRNA processing (GO:0050684)	1-36	0.245838	0.444301	0	0	3.65143	5.12325	PTCD2
regulation of ossification (GO:0030278)	1-36	0.245838	0.444301	0	0	3.65143	5.12325	DKK1
regulation of receptor internalization (GO:0002090)	1-36	0.245838	0.444301	0	0	3.65143	5.12325	DKK1
mitochondrion disassembly (GO:0061726)	1-36	0.245838	0.444301	0	0	3.65143	5.12325	FUNDC1
cellular response to organic substance (GO:0071310)	2-123	0.249192	0.448572	0	0	2.11688	2.94148	IGFBP5	PTPN14
positive regulation of epithelial cell proliferation (GO:0050679)	2-123	0.249192	0.448572	0	0	2.11688	2.94148	VIP	SCG2
proton transmembrane transport (GO:1902600)	1-37	0.251731	0.448572	0	0	3.54982	4.8966	SLC25A14
negative regulation of endothelial cell proliferation (GO:0001937)	1-37	0.251731	0.448572	0	0	3.54982	4.8966	SCG2
glutamate receptor signaling pathway (GO:0007215)	1-37	0.251731	0.448572	0	0	3.54982	4.8966	GRM7
positive regulation of myeloid cell differentiation (GO:0045639)	1-37	0.251731	0.448572	0	0	3.54982	4.8966	MTURN
skeletal muscle tissue development (GO:0007519)	1-37	0.251731	0.448572	0	0	3.54982	4.8966	MYORG
lysosome localization (GO:0032418)	1-37	0.251731	0.448572	0	0	3.54982	4.8966	CHGA
regulation of tumor necrosis factor production (GO:0032680)	2-124	0.252079	0.448572	0	0	2.09943	2.89303	FRMD8	NFKBIL1
regulation of cell communication (GO:0010646)	1-38	0.257578	0.454193	0	0	3.45371	4.68471	IGFBPL1
negative regulation of TOR signaling (GO:0032007)	1-38	0.257578	0.454193	0	0	3.45371	4.68471	TBC1D7
sterol biosynthetic process (GO:0016126)	1-38	0.257578	0.454193	0	0	3.45371	4.68471	APOA5
positive regulation of signaling (GO:0023056)	1-38	0.257578	0.454193	0	0	3.45371	4.68471	WLS
ventricular septum development (GO:0003281)	1-38	0.257578	0.454193	0	0	3.45371	4.68471	STRA6
circulatory system development (GO:0072359)	2-126	0.257856	0.454193	0	0	2.06535	2.79929	BORCS8	STRA6
negative regulation of protein secretion (GO:0050709)	1-39	0.26338	0.460805	0	0	3.36265	4.4863	CHGA
endothelial cell migration (GO:0043542)	1-39	0.26338	0.460805	0	0	3.36265	4.4863	SCG2
positive regulation of intracellular transport (GO:0032388)	1-39	0.26338	0.460805	0	0	3.36265	4.4863	PGAP1
protein acylation (GO:0043543)	1-39	0.26338	0.460805	0	0	3.36265	4.4863	ZDHHC18
negative regulation of ERBB signaling pathway (GO:1901185)	1-40	0.269137	0.46463	0	0	3.27626	4.3002	LGMN
autophagy of mitochondrion (GO:0000422)	1-40	0.269137	0.46463	0	0	3.27626	4.3002	FUNDC1
bone development (GO:0060348)	1-40	0.269137	0.46463	0	0	3.27626	4.3002	MBTPS2
organic hydroxy compound transport (GO:0015850)	1-40	0.269137	0.46463	0	0	3.27626	4.3002	STRA6
positive regulation of catalytic activity (GO:0043085)	1-40	0.269137	0.46463	0	0	3.27626	4.3002	PSEN2
positive regulation of cation channel activity (GO:2001259)	1-40	0.269137	0.46463	0	0	3.27626	4.3002	GAL
fatty acid derivative biosynthetic process (GO:1901570)	1-40	0.269137	0.46463	0	0	3.27626	4.3002	PAM
intraciliary transport involved in cilium assembly (GO:0035735)	1-40	0.269137	0.46463	0	0	3.27626	4.3002	IFT20
acylglycerol metabolic process (GO:0006639)	1-41	0.274849	0.466751	0	0	3.19419	4.1254	APOA5
carbohydrate catabolic process (GO:0016052)	1-41	0.274849	0.466751	0	0	3.19419	4.1254	NEU1
carboxylic acid transmembrane transport (GO:1905039)	1-41	0.274849	0.466751	0	0	3.19419	4.1254	SLC25A14
regulation of filopodium assembly (GO:0051489)	1-41	0.274849	0.466751	0	0	3.19419	4.1254	MIEN1
nucleobase-containing compound catabolic process (GO:0034655)	1-41	0.274849	0.466751	0	0	3.19419	4.1254	SIDT2
epithelial cell migration (GO:0010631)	1-41	0.274849	0.466751	0	0	3.19419	4.1254	SCG2
regulation of release of cytochrome c from mitochondria (GO:0090199)	1-41	0.274849	0.466751	0	0	3.19419	4.1254	MLLT11
regulation of viral transcription (GO:0046782)	1-41	0.274849	0.466751	0	0	3.19419	4.1254	POLR2L
response to growth factor (GO:0070848)	1-41	0.274849	0.466751	0	0	3.19419	4.1254	TBC1D7
keratinocyte differentiation (GO:0030216)	1-41	0.274849	0.466751	0	0	3.19419	4.1254	TXNIP
RNA metabolic process (GO:0016070)	2-133	0.278083	0.471474	0	0	1.9543	2.50118	SIDT2	POLR2L
calcium ion transmembrane import into cytosol (GO:0097553)	1-42	0.280517	0.472522	0	0	3.11613	3.96098	SLC8A2
nucleic acid-templated transcription (GO:0097659)	1-42	0.280517	0.472522	0	0	3.11613	3.96098	POLR2L
heterophilic cell-cell adhesion via plasma membrane cell adhesion molecules (GO:0007157)	1-42	0.280517	0.472522	0	0	3.11613	3.96098	HMCN1
mitochondrial gene expression (GO:0140053)	1-42	0.280517	0.472522	0	0	3.11613	3.96098	NDUFA7
negative regulation of proteolysis (GO:0045861)	1-43	0.286141	0.477603	0	0	3.04178	3.80609	DNAJC1
glutathione metabolic process (GO:0006749)	1-43	0.286141	0.477603	0	0	3.04178	3.80609	GSTM1
signal release from synapse (GO:0099643)	1-43	0.286141	0.477603	0	0	3.04178	3.80609	PTPRN2
positive regulation of neuron differentiation (GO:0045666)	1-43	0.286141	0.477603	0	0	3.04178	3.80609	ZC4H2
spermatid development (GO:0007286)	1-43	0.286141	0.477603	0	0	3.04178	3.80609	JAM2
negative regulation of inflammatory response to antigenic stimulus (GO:0002862)	2-136	0.286745	0.477603	0	0	1.91025	2.38621	CALCB	VIP
cellular calcium ion homeostasis (GO:0006874)	2-136	0.286745	0.477603	0	0	1.91025	2.38621	CALCB	SLC8A2
regulation of inflammatory response to antigenic stimulus (GO:0002861)	2-137	0.289631	0.47975	0	0	1.89601	2.34944	CALCB	VIP
cardiac ventricle morphogenesis (GO:0003208)	1-44	0.291721	0.47975	0	0	2.97089	3.66001	CPE
neurotransmitter secretion (GO:0007269)	1-44	0.291721	0.47975	0	0	2.97089	3.66001	PTPRN2
intracellular protein transmembrane transport (GO:0065002)	1-44	0.291721	0.47975	0	0	2.97089	3.66001	TOMM40L
positive regulation of receptor-mediated endocytosis (GO:0048260)	1-44	0.291721	0.47975	0	0	2.97089	3.66001	APOA5
mitotic spindle assembly (GO:0090307)	1-44	0.291721	0.47975	0	0	2.97089	3.66001	MZT1
mRNA catabolic process (GO:0006402)	1-44	0.291721	0.47975	0	0	2.97089	3.66001	LSM5
mRNA stabilization (GO:0048255)	1-44	0.291721	0.47975	0	0	2.97089	3.66001	VIP
protein dephosphorylation (GO:0006470)	2-2	0.295397	0.484265	0	0	1.86814	2.27807	PTPRN2	PTPN14
anterograde trans-synaptic signaling (GO:0098916)	3-3	0.296861	0.484265	0	0	1.59491	1.937	GRM7	NPY	SLC6A2
positive regulation of chemotaxis (GO:0050921)	1-45	0.297258	0.484265	0	0	2.90323	3.52207	LGMN
positive regulation of nervous system development (GO:0051962)	1-45	0.297258	0.484265	0	0	2.90323	3.52207	CUX2
positive regulation of Notch signaling pathway (GO:0045747)	1-45	0.297258	0.484265	0	0	2.90323	3.52207	TSPAN14
zymogen activation (GO:0031638)	1-45	0.297258	0.484265	0	0	2.90323	3.52207	LGMN
neuron projection morphogenesis (GO:0048812)	2-2	0.298278	0.485168	0	0	1.85451	2.24345	PLPPR4	MAPK8IP2
positive regulation of DNA-binding transcription factor activity (GO:0051091)	3-3	0.301116	0.486365	0	0	1.58162	1.89835	NTRK1	MTPN	MBTPS2
regulation of small GTPase mediated signal transduction (GO:0051056)	2-2	0.301157	0.486365	0	0	1.84107	2.20952	PLEKHG2	ARHGAP36
alpha-amino acid metabolic process (GO:1901605)	1-46	0.302751	0.486365	0	0	2.83857	3.39164	NAALAD2
regulation of fibroblast proliferation (GO:0048145)	1-46	0.302751	0.486365	0	0	2.83857	3.39164	NDUFS4
negative regulation of tumor necrosis factor production (GO:0032720)	1-46	0.302751	0.486365	0	0	2.83857	3.39164	NFKBIL1
erythrocyte differentiation (GO:0030218)	1-46	0.302751	0.486365	0	0	2.83857	3.39164	ALAS1
establishment of protein localization to extracellular region (GO:0035592)	1-46	0.302751	0.486365	0	0	2.83857	3.39164	SCG2
posttranscriptional regulation of gene expression (GO:0010608)	1-46	0.302751	0.486365	0	0	2.83857	3.39164	MTPN
protein localization to organelle (GO:0033365)	2-2	0.304034	0.487673	0	0	1.82783	2.17624	IFT20	SCG3
negative regulation of DNA-binding transcription factor activity (GO:0043433)	2-2	0.306909	0.48983	0	0	1.81477	2.14362	NFKBIL1	MTURN
nitrogen compound transport (GO:0071705)	2-2	0.306909	0.48983	0	0	1.81477	2.14362	TXNIP	SLC6A2
regulation of cellular metabolic process (GO:0031323)	1-47	0.308203	0.48983	0	0	2.77672	3.26819	DKK1
regulation of synapse assembly (GO:0051963)	1-47	0.308203	0.48983	0	0	2.77672	3.26819	CUX2
glycosphingolipid metabolic process (GO:0006687)	1-47	0.308203	0.48983	0	0	2.77672	3.26819	NEU1
positive regulation of neuron death (GO:1901216)	1-47	0.308203	0.48983	0	0	2.77672	3.26819	DKK1
positive regulation of cell population proliferation (GO:0008284)	5-5	0.311273	0.493956	0	0	1.36792	1.59648	NDUFS4	GID8	VIP	LGMN	TSPAN31
purine ribonucleotide biosynthetic process (GO:0009152)	1-48	0.313611	0.49465	0	0	2.7175	3.15122	SLC26A2
negative regulation of tumor necrosis factor superfamily cytokine production (GO:1903556)	1-48	0.313611	0.49465	0	0	2.7175	3.15122	NFKBIL1
regulation of protein metabolic process (GO:0051246)	1-48	0.313611	0.49465	0	0	2.7175	3.15122	MTPN
positive regulation of endocytosis (GO:0045807)	1-48	0.313611	0.49465	0	0	2.7175	3.15122	APOA5
regulation of mRNA stability (GO:0043488)	2-2	0.315521	0.496909	0	0	1.7767	2.04947	VIP	PSMB9
regulation of cellular protein metabolic process (GO:0032268)	1-49	0.318978	0.499332	0	0	2.66075	3.04026	MTPN
oligosaccharide metabolic process (GO:0009311)	1-49	0.318978	0.499332	0	0	2.66075	3.04026	NEU1
regulation of stress-activated MAPK cascade (GO:0032872)	1-49	0.318978	0.499332	0	0	2.66075	3.04026	MAPK8IP2
secondary alcohol metabolic process (GO:1902652)	1-49	0.318978	0.499332	0	0	2.66075	3.04026	STARD3
regulation of cytosolic calcium ion concentration (GO:0051480)	2-2	0.321249	0.502132	0	0	1.75218	1.98967	CALCB	SLC8A2
positive regulation of hydrolase activity (GO:0051345)	2-2	0.324108	0.505388	0	0	1.74017	1.96061	NTRK1	TBC1D7
positive regulation of cell morphogenesis involved in differentiation (GO:0010770)	1-50	0.324303	0.505388	0	0	2.60632	2.93492	CUX2
protein transport (GO:0015031)	4-4	0.325115	0.505897	0	0	1.4044	1.57795	TXNIP	RAB28	SCG2	WLS
regulation of cellular amine metabolic process (GO:0033238)	1-51	0.329587	0.511326	0	0	2.55406	2.8348	PSMB9
regulation of protein modification process (GO:0031399)	1-51	0.329587	0.511326	0	0	2.55406	2.8348	NDUFS4
negative regulation of protein phosphorylation (GO:0001933)	2-2	0.332669	0.51534	0	0	1.70511	1.87665	GSKIP	DKK1
amide biosynthetic process (GO:0043604)	1-52	0.334829	0.516381	0	0	2.50386	2.73956	PAM
negative regulation of protein-containing complex assembly (GO:0031333)	1-52	0.334829	0.516381	0	0	2.50386	2.73956	DKK1
response to peptide hormone (GO:0043434)	1-52	0.334829	0.516381	0	0	2.50386	2.73956	IGFBP5
positive regulation of protein kinase activity (GO:0045860)	2-2	0.33836	0.520548	0	0	1.6825	1.82324	DKK1	SLC8A2
cellular macromolecule catabolic process (GO:0044265)	1-53	0.340031	0.520548	0	0	2.45558	2.64888	SIDT2
epidermal cell differentiation (GO:0009913)	1-53	0.340031	0.520548	0	0	2.45558	2.64888	TXNIP
positive regulation of B cell activation (GO:0050871)	1-53	0.340031	0.520548	0	0	2.45558	2.64888	TNIP2
positive regulation of phagocytosis (GO:0050766)	1-53	0.340031	0.520548	0	0	2.45558	2.64888	LMAN2
cellular response to interleukin-1 (GO:0071347)	2-2	0.341199	0.520804	0	0	1.67142	1.79726	TNIP2	PSMB9
positive regulation of NF-kappaB transcription factor activity (GO:0051092)	2-2	0.341199	0.520804	0	0	1.67142	1.79726	NTRK1	MTPN
regulation of cellular amino acid metabolic process (GO:0006521)	1-54	0.345192	0.522304	0	0	2.40913	2.56248	PSMB9
regulation of megakaryocyte differentiation (GO:0045652)	1-54	0.345192	0.522304	0	0	2.40913	2.56248	MTURN
regulation of proteolysis (GO:0030162)	1-54	0.345192	0.522304	0	0	2.40913	2.56248	DNAJC1
glycosaminoglycan metabolic process (GO:0030203)	1-54	0.345192	0.522304	0	0	2.40913	2.56248	IDS
positive regulation of leukocyte chemotaxis (GO:0002690)	1-54	0.345192	0.522304	0	0	2.40913	2.56248	LGMN
inorganic anion transport (GO:0015698)	1-54	0.345192	0.522304	0	0	2.40913	2.56248	SLC25A14
protein deubiquitination (GO:0016579)	3-3	0.345887	0.522595	0	0	1.45425	1.54389	TNIP2	USP9Y	PSMB9
cellular response to growth factor stimulus (GO:0071363)	2-2	0.349696	0.523961	0	0	1.63903	1.72211	NTRK1	LGMN
negative regulation of cysteine-type endopeptidase activity involved in apoptotic process (GO:0043154)	1-55	0.350314	0.523961	0	0	2.3644	2.48008	BCL2L12
regulation of cardiac conduction (GO:1903779)	1-55	0.350314	0.523961	0	0	2.3644	2.48008	SLC8A2
regulation of gene silencing by RNA (GO:0060966)	1-55	0.350314	0.523961	0	0	2.3644	2.48008	POLR2L
regulation of posttranscriptional gene silencing (GO:0060147)	1-55	0.350314	0.523961	0	0	2.3644	2.48008	POLR2L
glycoprotein metabolic process (GO:0009100)	1-55	0.350314	0.523961	0	0	2.3644	2.48008	MGAT4B
triglyceride metabolic process (GO:0006641)	1-55	0.350314	0.523961	0	0	2.3644	2.48008	APOA5
response to lipopolysaccharide (GO:0032496)	2-2	0.35252	0.526504	0	0	1.62851	1.69796	TNIP2	NFKBIL1
regulation of ATP metabolic process (GO:1903578)	1-56	0.355395	0.52777	0	0	2.32129	2.40143	COX7A2
peptidyl-tyrosine modification (GO:0018212)	1-56	0.355395	0.52777	0	0	2.32129	2.40143	NTRK1
glycosaminoglycan catabolic process (GO:0006027)	1-56	0.355395	0.52777	0	0	2.32129	2.40143	IDS
sensory organ development (GO:0007423)	1-56	0.355395	0.52777	0	0	2.32129	2.40143	STRA6
negative regulation of cell cycle G2/M phase transition (GO:1902750)	1-57	0.360437	0.531466	0	0	2.27972	2.32631	PSMB9
negative regulation of DNA recombination (GO:0045910)	1-57	0.360437	0.531466	0	0	2.27972	2.32631	POLR2L
positive regulation of cell junction assembly (GO:1901890)	1-57	0.360437	0.531466	0	0	2.27972	2.32631	CUX2
renal system development (GO:0072001)	1-57	0.360437	0.531466	0	0	2.27972	2.32631	STRA6
positive regulation of gene expression, epigenetic (GO:0045815)	1-57	0.360437	0.531466	0	0	2.27972	2.32631	POLR2L
protein modification by small protein removal (GO:0070646)	3-3	0.365033	0.534302	0	0	1.40566	1.41658	TNIP2	USP9Y	PSMB9
receptor metabolic process (GO:0043112)	1-58	0.36544	0.534302	0	0	2.23962	2.25451	LGMN
regulation of pathway-restricted SMAD protein phosphorylation (GO:0060393)	1-58	0.36544	0.534302	0	0	2.23962	2.25451	DKK1
regulation of phagocytosis (GO:0050764)	1-58	0.36544	0.534302	0	0	2.23962	2.25451	LMAN2
positive regulation of mitochondrion organization (GO:0010822)	1-58	0.36544	0.534302	0	0	2.23962	2.25451	MLLT11
positive regulation of mitotic cell cycle phase transition (GO:1901992)	1-58	0.36544	0.534302	0	0	2.23962	2.25451	ADAMTS1
heart development (GO:0007507)	2-2	0.366576	0.535212	0	0	1.57784	1.58344	BORCS8	STRA6
adenylate cyclase-modulating G protein-coupled receptor signaling pathway (GO:0007188)	2-2	0.369374	0.538541	0	0	1.56808	1.56172	CALCB	VIP
regulation of secretion by cell (GO:1903530)	1-59	0.370404	0.539288	0	0	2.20089	2.18584	DNAJC1
regulation of MAPK cascade (GO:0043408)	2-2	0.372167	0.541097	0	0	1.55844	1.54038	NTRK1	PRDM11
adenylate cyclase-inhibiting G protein-coupled receptor signaling pathway (GO:0007193)	1-60	0.375329	0.541911	0	0	2.16348	2.1201	GRM7
apical junction assembly (GO:0043297)	1-60	0.375329	0.541911	0	0	2.16348	2.1201	FBF1
cellular protein catabolic process (GO:0044257)	1-60	0.375329	0.541911	0	0	2.16348	2.1201	LGMN
Notch signaling pathway (GO:0007219)	1-60	0.375329	0.541911	0	0	2.16348	2.1201	PSEN2
homophilic cell adhesion via plasma membrane adhesion molecules (GO:0007156)	1-60	0.375329	0.541911	0	0	2.16348	2.1201	HMCN1
cellular protein-containing complex assembly (GO:0034622)	2-2	0.377737	0.544633	0	0	1.53951	1.4988	COX7A2	MAPK8IP2
regulation of DNA-templated transcription, initiation (GO:2000142)	1-61	0.380217	0.545187	0	0	2.12731	2.05714	MED10
pattern recognition receptor signaling pathway (GO:0002221)	1-61	0.380217	0.545187	0	0	2.12731	2.05714	LGMN
response to light stimulus (GO:0009416)	1-61	0.380217	0.545187	0	0	2.12731	2.05714	TP53I13
protein lipidation (GO:0006497)	1-61	0.380217	0.545187	0	0	2.12731	2.05714	ZDHHC18
negative regulation of kinase activity (GO:0033673)	1-62	0.385066	0.548462	0	0	2.09233	1.9968	GSKIP
positive regulation of cysteine-type endopeptidase activity (GO:2001056)	1-62	0.385066	0.548462	0	0	2.09233	1.9968	LGMN
I-kappaB kinase/NF-kappaB signaling (GO:0007249)	1-62	0.385066	0.548462	0	0	2.09233	1.9968	NFKBIL1
stress-activated MAPK cascade (GO:0051403)	1-62	0.385066	0.548462	0	0	2.09233	1.9968	TNIP2
neuron projection development (GO:0031175)	2-2	0.386055	0.548462	0	0	1.51195	1.43904	GRM7	NPY
positive regulation of I-kappaB kinase/NF-kappaB signaling (GO:0043123)	2-2	0.386055	0.548462	0	0	1.51195	1.43904	TNIP2	WLS
regulation of cell population proliferation (GO:0042127)	7-7	0.386942	0.548462	0	0	1.18455	1.12471	NTRK1	ADAMTS1	GID8	VIP	PTPN14	LGMN	TSPAN31
positive regulation of ERK1 and ERK2 cascade (GO:0070374)	2-2	0.388817	0.548462	0	0	1.50298	1.41978	NTRK1	MTURN
amyloid fibril formation (GO:1990000)	1-63	0.389877	0.548462	0	0	2.05848	1.93893	TSPAN14
anterior/posterior pattern specification (GO:0009952)	1-63	0.389877	0.548462	0	0	2.05848	1.93893	WLS
organonitrogen compound catabolic process (GO:1901565)	1-63	0.389877	0.548462	0	0	2.05848	1.93893	TXN2
positive regulation of Ras protein signal transduction (GO:0046579)	1-63	0.389877	0.548462	0	0	2.05848	1.93893	NTRK1
positive regulation of viral process (GO:0048524)	1-63	0.389877	0.548462	0	0	2.05848	1.93893	POLR2L
monocarboxylic acid biosynthetic process (GO:0072330)	1-63	0.389877	0.548462	0	0	2.05848	1.93893	NDUFAB1
regulation of cellular ketone metabolic process (GO:0010565)	1-64	0.394651	0.551452	0	0	2.0257	1.88341	PSMB9
diterpenoid metabolic process (GO:0016101)	1-64	0.394651	0.551452	0	0	2.0257	1.88341	STRA6
regulation of transcription initiation from RNA polymerase II promoter (GO:0060260)	1-64	0.394651	0.551452	0	0	2.0257	1.88341	MED10
lipid homeostasis (GO:0055088)	1-64	0.394651	0.551452	0	0	2.0257	1.88341	APOA5
pre-replicative complex assembly (GO:0036388)	1-64	0.394651	0.551452	0	0	2.0257	1.88341	PSMB9
BMP signaling pathway (GO:0030509)	1-65	0.399388	0.555833	0	0	1.99395	1.83009	USP9Y
chemical homeostasis (GO:0048878)	1-65	0.399388	0.555833	0	0	1.99395	1.83009	VGF
G protein-coupled receptor signaling pathway, coupled to cyclic nucleotide second messenger (GO:0007187)	1-65	0.399388	0.555833	0	0	1.99395	1.83009	NPY
negative regulation of G2/M transition of mitotic cell cycle (GO:0010972)	1-66	0.404088	0.556582	0	0	1.96318	1.77888	PSMB9
cell-cell junction assembly (GO:0007043)	1-66	0.404088	0.556582	0	0	1.96318	1.77888	FBF1
cellular component disassembly (GO:0022411)	1-66	0.404088	0.556582	0	0	1.96318	1.77888	ADAMTS4
embryonic organ development (GO:0048568)	1-66	0.404088	0.556582	0	0	1.96318	1.77888	STRA6
regulation of protein localization (GO:0032880)	1-66	0.404088	0.556582	0	0	1.96318	1.77888	VIP
extracellular matrix disassembly (GO:0022617)	1-66	0.404088	0.556582	0	0	1.96318	1.77888	ADAMTS4
positive regulation of cell cycle (GO:0045787)	1-66	0.404088	0.556582	0	0	1.96318	1.77888	LGMN
negative regulation of immune response (GO:0050777)	2-2	0.405273	0.556582	0	0	1.4513	1.31081	CALCB	VIP
regulation of mitotic cell cycle (GO:0007346)	2-2	0.405273	0.556582	0	0	1.4513	1.31081	LGMN	PSMB9
regulation of translation (GO:0006417)	2-2	0.405273	0.556582	0	0	1.4513	1.31081	MTPN	IGFBP5
protein stabilization (GO:0050821)	2-2	0.407995	0.558412	0	0	1.44303	1.29367	PEX19	TNIP2
RNA processing (GO:0006396)	2-2	0.407995	0.558412	0	0	1.44303	1.29367	LSM5	LSM3
protein N-linked glycosylation (GO:0006487)	1-67	0.408751	0.558412	0	0	1.93333	1.72965	MGAT4B
regulation of gene silencing by miRNA (GO:0060964)	1-67	0.408751	0.558412	0	0	1.93333	1.72965	POLR2L
cellular response to calcium ion (GO:0071277)	1-69	0.41797	0.566311	0	0	1.87628	1.63677	LGMN
peptidyl-tyrosine phosphorylation (GO:0018108)	1-69	0.41797	0.566311	0	0	1.87628	1.63677	NTRK1
positive regulation of MAP kinase activity (GO:0043406)	1-69	0.41797	0.566311	0	0	1.87628	1.63677	DKK1
carbohydrate homeostasis (GO:0033500)	1-70	0.422525	0.566311	0	0	1.84899	1.59292	VGF
defense response to Gram-positive bacterium (GO:0050830)	1-70	0.422525	0.566311	0	0	1.84899	1.59292	CHGA
DNA-templated transcription, termination (GO:0006353)	1-70	0.422525	0.566311	0	0	1.84899	1.59292	POLR2L
regulation of plasma membrane bounded cell projection assembly (GO:0120032)	1-70	0.422525	0.566311	0	0	1.84899	1.59292	IFT20
establishment of protein localization to membrane (GO:0090150)	1-70	0.422525	0.566311	0	0	1.84899	1.59292	ZDHHC18
kidney development (GO:0001822)	1-70	0.422525	0.566311	0	0	1.84899	1.59292	STRA6
snRNA transcription by RNA polymerase II (GO:0042795)	1-70	0.422525	0.566311	0	0	1.84899	1.59292	POLR2L
sterol metabolic process (GO:0016125)	1-70	0.422525	0.566311	0	0	1.84899	1.59292	STARD3
endoplasmic reticulum to Golgi vesicle-mediated transport (GO:0006888)	2-2	0.424201	0.566311	0	0	1.39529	1.19652	PGAP1	LMAN2
regulation of endopeptidase activity (GO:0052548)	1-71	0.427046	0.566311	0	0	1.82249	1.55069	PSMB9
cellular response to BMP stimulus (GO:0071773)	1-71	0.427046	0.566311	0	0	1.82249	1.55069	USP9Y
regulation of G1/S transition of mitotic cell cycle (GO:2000045)	1-71	0.427046	0.566311	0	0	1.82249	1.55069	ADAMTS1
regulation of hematopoietic stem cell differentiation (GO:1902036)	1-71	0.427046	0.566311	0	0	1.82249	1.55069	PSMB9
cholesterol homeostasis (GO:0042632)	1-71	0.427046	0.566311	0	0	1.82249	1.55069	APOA5
nucleic acid metabolic process (GO:0090304)	1-71	0.427046	0.566311	0	0	1.82249	1.55069	POLR2L
fatty acid biosynthetic process (GO:0006633)	1-71	0.427046	0.566311	0	0	1.82249	1.55069	NDUFAB1
regulation of TOR signaling (GO:0032006)	1-71	0.427046	0.566311	0	0	1.82249	1.55069	TBC1D7
gland development (GO:0048732)	1-71	0.427046	0.566311	0	0	1.82249	1.55069	STRA6
response to metal ion (GO:0010038)	1-71	0.427046	0.566311	0	0	1.82249	1.55069	PAM
snRNA transcription (GO:0009301)	1-71	0.427046	0.566311	0	0	1.82249	1.55069	POLR2L
negative regulation of epithelial cell proliferation (GO:0050680)	1-72	0.431531	0.567918	0	0	1.79673	1.51	SCG2
cell junction organization (GO:0034330)	1-72	0.431531	0.567918	0	0	1.79673	1.51	SLC8A2
extrinsic apoptotic signaling pathway (GO:0097191)	1-72	0.431531	0.567918	0	0	1.79673	1.51	MLLT11
positive regulation of neurogenesis (GO:0050769)	1-72	0.431531	0.567918	0	0	1.79673	1.51	CUX2
sterol homeostasis (GO:0055092)	1-72	0.431531	0.567918	0	0	1.79673	1.51	APOA5
positive regulation of protein secretion (GO:0050714)	1-72	0.431531	0.567918	0	0	1.79673	1.51	WLS
regulation of GTPase activity (GO:0043087)	2-2	0.434879	0.568742	0	0	1.36516	1.13676	NTRK1	TBC1D7
antigen processing and presentation of exogenous peptide antigen via MHC class I, TAP-dependent (GO:0002479)	1-73	0.435981	0.568742	0	0	1.77168	1.47078	PSMB9
defense response to Gram-negative bacterium (GO:0050829)	1-73	0.435981	0.568742	0	0	1.77168	1.47078	CHGA
endoplasmic reticulum organization (GO:0007029)	1-73	0.435981	0.568742	0	0	1.77168	1.47078	LMAN2
granulocyte chemotaxis (GO:0071621)	1-73	0.435981	0.568742	0	0	1.77168	1.47078	SCG2
positive regulation of JNK cascade (GO:0046330)	1-73	0.435981	0.568742	0	0	1.77168	1.47078	MTURN
transcription-coupled nucleotide-excision repair (GO:0006283)	1-73	0.435981	0.568742	0	0	1.77168	1.47078	POLR2L
proteolysis involved in cellular protein catabolic process (GO:0051603)	1-74	0.440396	0.571636	0	0	1.74733	1.43295	LGMN
negative regulation of protein binding (GO:0032091)	1-74	0.440396	0.571636	0	0	1.74733	1.43295	DKK1
NIK/NF-kappaB signaling (GO:0038061)	1-74	0.440396	0.571636	0	0	1.74733	1.43295	PSMB9
mitotic nuclear division (GO:0140014)	1-74	0.440396	0.571636	0	0	1.74733	1.43295	MZT1
cellular macromolecule biosynthetic process (GO:0034645)	3-3	0.444453	0.573825	0	0	1.23151	0.998647	MRPL41	ALAS1	POLR2L
regulation of hematopoietic progenitor cell differentiation (GO:1901532)	1-75	0.444777	0.573825	0	0	1.72363	1.39645	PSMB9
fibroblast growth factor receptor signaling pathway (GO:0008543)	1-75	0.444777	0.573825	0	0	1.72363	1.39645	POLR2L
integrin-mediated signaling pathway (GO:0007229)	1-75	0.444777	0.573825	0	0	1.72363	1.39645	ADAMTS1
regulation of intracellular signal transduction (GO:1902531)	4-4	0.444838	0.573825	0	0	1.17971	0.955621	NTRK1	PLEKHG2	PRDM11	ARHGAP36
regulation of cell division (GO:0051302)	1-76	0.449124	0.576496	0	0	1.70056	1.36122	TXNIP
establishment of protein localization to organelle (GO:0072594)	1-76	0.449124	0.576496	0	0	1.70056	1.36122	PEX19
positive regulation of growth (GO:0045927)	1-76	0.449124	0.576496	0	0	1.70056	1.36122	MTPN
RNA transport (GO:0050658)	1-76	0.449124	0.576496	0	0	1.70056	1.36122	SIDT2
protein localization to membrane (GO:0072657)	2-2	0.450694	0.577052	0	0	1.32232	1.05384	TSPAN14	CPE
regulation of organelle assembly (GO:1902115)	1-77	0.453437	0.577052	0	0	1.6781	1.3272	IFT20
phosphatidylcholine metabolic process (GO:0046470)	1-77	0.453437	0.577052	0	0	1.6781	1.3272	APOA5
positive regulation of phosphatidylinositol 3-kinase signaling (GO:0014068)	1-77	0.453437	0.577052	0	0	1.6781	1.3272	NTRK1
positive regulation of protein modification by small protein conjugation or removal (GO:1903322)	1-77	0.453437	0.577052	0	0	1.6781	1.3272	TBC1D7
positive regulation of tumor necrosis factor production (GO:0032760)	1-77	0.453437	0.577052	0	0	1.6781	1.3272	FRMD8
positive regulation of type I interferon production (GO:0032481)	1-77	0.453437	0.577052	0	0	1.6781	1.3272	POLR2L
protein modification process (GO:0036211)	1-78	0.457717	0.58037	0	0	1.65622	1.29434	CPE
negative regulation of blood vessel morphogenesis (GO:2000181)	1-78	0.457717	0.58037	0	0	1.65622	1.29434	ADAMTS1
antigen processing and presentation of exogenous peptide antigen via MHC class I (GO:0042590)	1-78	0.457717	0.58037	0	0	1.65622	1.29434	PSMB9
negative regulation of gene expression (GO:0010629)	3-3	0.46072	0.583467	0	0	1.20014	0.930062	IGFBP5	LSM5	LGMN
recombinational repair (GO:0000725)	1-79	0.461963	0.58433	0	0	1.6349	1.26259	AP5S1
cellular response to oxygen-containing compound (GO:1901701)	3-3	0.46274	0.584602	0	0	1.19632	0.921875	IGFBP5	TNIP2	NFKBIL1
negative regulation of cell cycle (GO:0045786)	1-80	0.466177	0.586099	0	0	1.61413	1.23189	TP53I13
negative regulation of extrinsic apoptotic signaling pathway (GO:2001237)	1-80	0.466177	0.586099	0	0	1.61413	1.23189	SCG2
glycerophospholipid metabolic process (GO:0006650)	1-80	0.466177	0.586099	0	0	1.61413	1.23189	APOA5
skin development (GO:0043588)	1-80	0.466177	0.586099	0	0	1.61413	1.23189	TXNIP
regulation of gene expression (GO:0010468)	9-9	0.467127	0.586585	0	0	1.07423	0.817657	MYCBP	CUX2	SPIN4	ATXN7L3B	PRDM11	BACH1	DKK1	SLC8A2	LGMN
phospholipase C-activating G protein-coupled receptor signaling pathway (GO:0007200)	1-81	0.470357	0.58922	0	0	1.59387	1.2022	VIP
positive regulation of tumor necrosis factor superfamily cytokine production (GO:1903557)	1-81	0.470357	0.58922	0	0	1.59387	1.2022	FRMD8
regulation of gene expression, epigenetic (GO:0040029)	1-82	0.474505	0.591921	0	0	1.57411	1.17347	POLR2L
ephrin receptor signaling pathway (GO:0048013)	1-82	0.474505	0.591921	0	0	1.57411	1.17347	PSEN2
positive regulation of protein ubiquitination (GO:0031398)	1-82	0.474505	0.591921	0	0	1.57411	1.17347	TBC1D7
cellular protein localization (GO:0034613)	3-3	0.474788	0.591921	0	0	1.17394	0.874456	CPE	RAB28	WLS
proteasomal protein catabolic process (GO:0010498)	2-2	0.476491	0.593334	0	0	1.25654	0.931481	GID8	PSMB9
regulation of Notch signaling pathway (GO:0008593)	1-83	0.478621	0.594564	0	0	1.55484	1.14568	TSPAN14
positive regulation of plasma membrane bounded cell projection assembly (GO:0120034)	1-83	0.478621	0.594564	0	0	1.55484	1.14568	MIEN1
regulation of protein kinase B signaling (GO:0051896)	2-2	0.481563	0.596788	0	0	1.24416	0.909127	NTRK1	MYORG
anaphase-promoting complex-dependent catabolic process (GO:0031145)	1-84	0.482705	0.596788	0	0	1.53603	1.11877	PSMB9
spindle assembly (GO:0051225)	1-84	0.482705	0.596788	0	0	1.53603	1.11877	MZT1
vascular transport (GO:0010232)	1-84	0.482705	0.596788	0	0	1.53603	1.11877	SLC8A2
G1/S transition of mitotic cell cycle (GO:0000082)	1-85	0.486757	0.598952	0	0	1.51767	1.09271	BACH1
retrograde vesicle-mediated transport, Golgi to endoplasmic reticulum (GO:0006890)	1-85	0.486757	0.598952	0	0	1.51767	1.09271	LMAN2
positive regulation of protein catabolic process (GO:0045732)	1-85	0.486757	0.598952	0	0	1.51767	1.09271	VIP
Wnt signaling pathway, planar cell polarity pathway (GO:0060071)	1-85	0.486757	0.598952	0	0	1.51767	1.09271	PSMB9
negative regulation of cellular amide metabolic process (GO:0034249)	1-86	0.490777	0.601057	0	0	1.49973	1.06746	IGFBP5
regulation of Ras protein signal transduction (GO:0046578)	1-86	0.490777	0.601057	0	0	1.49973	1.06746	NTRK1
positive regulation of endothelial cell migration (GO:0010595)	1-86	0.490777	0.601057	0	0	1.49973	1.06746	LGMN
transport across blood-brain barrier (GO:0150104)	1-86	0.490777	0.601057	0	0	1.49973	1.06746	SLC8A2
negative regulation of inflammatory response (GO:0050728)	2-2	0.49411	0.603105	0	0	1.21422	0.856024	CALCB	VIP
phosphate-containing compound metabolic process (GO:0006796)	2-2	0.49411	0.603105	0	0	1.21422	0.856024	PLPPR2	PLPPR4
negative regulation of angiogenesis (GO:0016525)	1-87	0.494766	0.603105	0	0	1.48222	1.04299	ADAMTS1
calcium ion transmembrane transport (GO:0070588)	1-87	0.494766	0.603105	0	0	1.48222	1.04299	SLC8A2
regulation of cellular macromolecule biosynthetic process (GO:2000112)	4-4	0.497591	0.605522	0	0	1.09914	0.767174	MTPN	MYCBP	SPIN4	BACH1
regulation of establishment of planar polarity (GO:0090175)	1-88	0.498724	0.605522	0	0	1.46511	1.01928	PSMB9
positive regulation of GTPase activity (GO:0043547)	2-2	0.499076	0.605522	0	0	1.20265	0.835837	NTRK1	TBC1D7
translation (GO:0006412)	2-2	0.499076	0.605522	0	0	1.20265	0.835837	MRPL41	NDUFA7
regulation of type I interferon production (GO:0032479)	1-89	0.502651	0.605625	0	0	1.44839	0.996285	POLR2L
SCF-dependent proteasomal ubiquitin-dependent protein catabolic process (GO:0031146)	1-89	0.502651	0.605625	0	0	1.44839	0.996285	PSMB9
transforming growth factor beta receptor signaling pathway (GO:0007179)	1-89	0.502651	0.605625	0	0	1.44839	0.996285	USP9Y
mitochondrial translational elongation (GO:0070125)	1-89	0.502651	0.605625	0	0	1.44839	0.996285	MRPL41
mitochondrial translational termination (GO:0070126)	1-89	0.502651	0.605625	0	0	1.44839	0.996285	MRPL41
protein import (GO:0017038)	1-89	0.502651	0.605625	0	0	1.44839	0.996285	PEX19
regulation of cell growth (GO:0001558)	2-2	0.506465	0.608208	0	0	1.18568	0.80662	MTPN	PRDM11
negative regulation of protein kinase activity (GO:0006469)	1-90	0.506548	0.608208	0	0	1.43204	0.973983	GSKIP
negative regulation of translation (GO:0017148)	1-90	0.506548	0.608208	0	0	1.43204	0.973983	IGFBP5
regulation of stem cell differentiation (GO:2000736)	1-91	0.510414	0.61144	0	0	1.41606	0.952345	PSMB9
positive regulation of transport (GO:0051050)	1-91	0.510414	0.61144	0	0	1.41606	0.952345	LMAN2
cellular response to lipid (GO:0071396)	2-2	0.511353	0.61186	0	0	1.17464	0.787823	TNIP2	NFKBIL1
negative regulation of mitotic cell cycle phase transition (GO:1901991)	1-92	0.514251	0.612511	0	0	1.40043	0.931346	PSMB9
cellular response to fibroblast growth factor stimulus (GO:0044344)	1-92	0.514251	0.612511	0	0	1.40043	0.931346	POLR2L
positive regulation of cellular component biogenesis (GO:0044089)	1-92	0.514251	0.612511	0	0	1.40043	0.931346	CHGA
retinoid metabolic process (GO:0001523)	1-92	0.514251	0.612511	0	0	1.40043	0.931346	STRA6
transcription, DNA-templated (GO:0006351)	2-2	0.516209	0.614141	0	0	1.16379	0.76955	ELOC	POLR2L
regulation of heart contraction (GO:0008016)	1-93	0.518057	0.615636	0	0	1.38513	0.910961	SLC8A2
negative regulation of cell death (GO:0060548)	1-94	0.521834	0.618712	0	0	1.37017	0.891168	CHGA
regulation of kinase activity (GO:0043549)	1-94	0.521834	0.618712	0	0	1.37017	0.891168	NTRK1
regulation of I-kappaB kinase/NF-kappaB signaling (GO:0043122)	2-2	0.523433	0.619386	0	0	1.14789	0.743081	TNIP2	WLS
ubiquitin-dependent protein catabolic process (GO:0006511)	3-3	0.523592	0.619386	0	0	1.08893	0.704586	GID8	ELOC	PSMB9
regulation of cell cycle phase transition (GO:1901987)	1-95	0.525581	0.620328	0	0	1.35553	0.871943	PSMB9
ciliary basal body-plasma membrane docking (GO:0097711)	1-95	0.525581	0.620328	0	0	1.35553	0.871943	FBF1
gene expression (GO:0010467)	3-3	0.527391	0.62176	0	0	1.08265	0.692696	MRPL41	TSPAN14	POLR2L
cellular transition metal ion homeostasis (GO:0046916)	1-96	0.529299	0.622599	0	0	1.34119	0.853267	SLC39A10
translational termination (GO:0006415)	1-96	0.529299	0.622599	0	0	1.34119	0.853267	MRPL41
cilium organization (GO:0044782)	2-2	0.532953	0.625525	0	0	1.12734	0.709461	IFT20	FBF1
double-strand break repair via homologous recombination (GO:0000724)	1-97	0.532988	0.625525	0	0	1.32715	0.835118	AP5S1
antigen processing and presentation of exogenous peptide antigen via MHC class II (GO:0019886)	1-98	0.536649	0.628404	0	0	1.3134	0.817477	LGMN
regulation of peptidyl-serine phosphorylation (GO:0033135)	1-98	0.536649	0.628404	0	0	1.3134	0.817477	DKK1
organic anion transport (GO:0015711)	1-99	0.540281	0.630529	0	0	1.29993	0.800326	SLC35C2
response to UV (GO:0009411)	1-99	0.540281	0.630529	0	0	1.29993	0.800326	TP53I13
positive regulation of stress-activated MAPK cascade (GO:0032874)	1-99	0.540281	0.630529	0	0	1.29993	0.800326	MTURN
antigen processing and presentation of peptide antigen via MHC class II (GO:0002495)	1-1	0.543884	0.633315	0	0	1.28674	0.783648	LGMN
organic acid transport (GO:0015849)	1-1	0.543884	0.633315	0	0	1.28674	0.783648	SLC25A14
regulation of cell death (GO:0010941)	1-1	0.551007	0.639464	0	0	1.26113	0.751643	DKK1
regulation of protein catabolic process (GO:0042176)	1-1	0.551007	0.639464	0	0	1.26113	0.751643	VIP
positive regulation of cell growth (GO:0030307)	1-1	0.551007	0.639464	0	0	1.26113	0.751643	MTPN
antigen processing and presentation of exogenous peptide antigen (GO:0002478)	1-1	0.554528	0.642117	0	0	1.2487	0.736284	LGMN
cellular response to organonitrogen compound (GO:0071417)	1-1	0.554528	0.642117	0	0	1.2487	0.736284	IGFBP5
regulation of ERK1 and ERK2 cascade (GO:0070372)	2-2	0.556184	0.64332	0	0	1.07902	0.633015	NTRK1	MTURN
regulation of insulin secretion (GO:0050796)	1-1	0.55802	0.644012	0	0	1.23652	0.721335	CHGA
translational elongation (GO:0006414)	1-1	0.55802	0.644012	0	0	1.23652	0.721335	MRPL41
axonogenesis (GO:0007409)	2-2	0.560732	0.645151	0	0	1.06985	0.618919	LAMA1	PLPPR4
activation of GTPase activity (GO:0090630)	1-1	0.561486	0.645151	0	0	1.22457	0.706781	TBC1D7
nucleotide-excision repair (GO:0006289)	1-1	0.561486	0.645151	0	0	1.22457	0.706781	POLR2L
positive regulation of cellular metabolic process (GO:0031325)	1-1	0.561486	0.645151	0	0	1.22457	0.706781	APOA5
peptidyl-lysine modification (GO:0018205)	1-1	0.564924	0.646959	0	0	1.21284	0.69261	NDUFAB1
regulation of phosphatidylinositol 3-kinase signaling (GO:0014066)	1-1	0.564924	0.646959	0	0	1.21284	0.69261	NTRK1
positive regulation of protein serine/threonine kinase activity (GO:0071902)	1-1	0.564924	0.646959	0	0	1.21284	0.69261	SLC8A2
response to calcium ion (GO:0051592)	1-1	0.568336	0.650151	0	0	1.20134	0.678808	LGMN
negative regulation of transmembrane receptor protein serine/threonine kinase signaling pathway (GO:0090101)	1-1	0.571721	0.653306	0	0	1.19005	0.665363	DKK1
regulation of protein ubiquitination (GO:0031396)	1-1	0.57508	0.656423	0	0	1.17897	0.652263	TBC1D7
regulation of protein kinase activity (GO:0045859)	1-1	0.578412	0.658463	0	0	1.1681	0.639497	GSKIP
response to endoplasmic reticulum stress (GO:0034976)	1-1	0.578412	0.658463	0	0	1.1681	0.639497	MBTPS2
positive regulation of macromolecule metabolic process (GO:0010604)	3-3	0.578764	0.658463	0	0	1.00165	0.54776	MTPN	CUX2	DKK1
regulation of protein serine/threonine kinase activity (GO:0071900)	1-1	0.581719	0.660381	0	0	1.15742	0.627053	SLC8A2
Fc-epsilon receptor signaling pathway (GO:0038095)	1-1	0.581719	0.660381	0	0	1.15742	0.627053	PSMB9
Fc receptor signaling pathway (GO:0038093)	1-1	0.584999	0.663382	0	0	1.14693	0.614922	PSMB9
negative regulation of cell motility (GO:2000146)	1-1	0.591485	0.667826	0	0	1.12652	0.591558	IGFBP5
cellular response to transforming growth factor beta stimulus (GO:0071560)	1-1	0.591485	0.667826	0	0	1.12652	0.591558	USP9Y
positive regulation of cellular component organization (GO:0051130)	1-1	0.591485	0.667826	0	0	1.12652	0.591558	APOA5
positive regulation of kinase activity (GO:0033674)	1-1	0.591485	0.667826	0	0	1.12652	0.591558	NTRK1
cellular response to lectin (GO:1990858)	1-1	0.594689	0.669991	0	0	1.11658	0.580306	PSMB9
stimulatory C-type lectin receptor signaling pathway (GO:0002223)	1-1	0.594689	0.669991	0	0	1.11658	0.580306	PSMB9
sphingolipid metabolic process (GO:0006665)	1-1	0.597869	0.672118	0	0	1.10682	0.569328	NEU1
tumor necrosis factor-mediated signaling pathway (GO:0033209)	1-1	0.597869	0.672118	0	0	1.10682	0.569328	PSMB9
regulation of cellular response to stress (GO:0080135)	1-1	0.604154	0.676991	0	0	1.08779	0.548164	MBTPS2
negative regulation of response to external stimulus (GO:0032102)	1-1	0.604154	0.676991	0	0	1.08779	0.548164	NFKBIL1
regulation of protein binding (GO:0043393)	1-1	0.604154	0.676991	0	0	1.08779	0.548164	DKK1
innate immune response activating cell surface receptor signaling pathway (GO:0002220)	1-1	0.60726	0.679739	0	0	1.07851	0.53796	PSMB9
macroautophagy (GO:0016236)	1-1	0.610342	0.682455	0	0	1.0694	0.527999	FUNDC1
transmembrane receptor protein tyrosine kinase signaling pathway (GO:0007169)	3-3	0.613265	0.684988	0	0	0.950711	0.464858	NTRK1	PSEN2	POLR2L
regulation of mRNA catabolic process (GO:0061013)	1-1	0.616433	0.687489	0	0	1.05161	0.508776	PSMB9
regulation of protein phosphorylation (GO:0001932)	2-2	0.616825	0.687489	0	0	0.963203	0.465391	NTRK1	NDUFS4
positive regulation of intracellular signal transduction (GO:1902533)	4-4	0.619455	0.689682	0	0	0.937172	0.448826	NTRK1	TNIP2	MYORG	WLS
non-canonical Wnt signaling pathway (GO:0035567)	1-1	0.62243	0.691515	0	0	1.03441	0.490438	PSMB9
fatty acid metabolic process (GO:0006631)	1-1	0.62243	0.691515	0	0	1.03441	0.490438	NDUFAB1
regulation of phosphorylation (GO:0042325)	1-1	0.625394	0.69259	0	0	1.02601	0.481585	NDUFS4
platelet degranulation (GO:0002576)	1-1	0.625394	0.69259	0	0	1.02601	0.481585	SCG3
regulation of protein secretion (GO:0050708)	1-1	0.625394	0.69259	0	0	1.02601	0.481585	DNAJC1
negative regulation of cell growth (GO:0030308)	1-1	0.628334	0.693633	0	0	1.01775	0.472934	PRDM11
negative regulation of growth (GO:0045926)	1-1	0.628334	0.693633	0	0	1.01775	0.472934	PRDM11
phosphatidylinositol biosynthetic process (GO:0006661)	1-1	0.628334	0.693633	0	0	1.01775	0.472934	PITPNM2
positive regulation of MAPK cascade (GO:0043410)	2-2	0.632951	0.697989	0	0	0.934492	0.427402	NTRK1	MTURN
plasma membrane bounded cell projection organization (GO:0120036)	1-1	0.634146	0.698567	0	0	1.00163	0.456217	NPY
DNA-dependent DNA replication (GO:0006261)	1-1	0.637018	0.700249	0	0	0.99375	0.448139	PSMB9
positive regulation of macromolecule biosynthetic process (GO:0010557)	1-1	0.637018	0.700249	0	0	0.99375	0.448139	MTPN
regulation of primary metabolic process (GO:0080090)	1-1	0.639867	0.700423	0	0	0.985996	0.440242	PSMB9
G2/M transition of mitotic cell cycle (GO:0000086)	1-1	0.639867	0.700423	0	0	0.985996	0.440242	BACH1
Golgi organization (GO:0007030)	1-1	0.639867	0.700423	0	0	0.985996	0.440242	LMAN2
protein glycosylation (GO:0006486)	1-1	0.639867	0.700423	0	0	0.985996	0.440242	MGAT4B
plasma membrane bounded cell projection assembly (GO:0120031)	2-2	0.640814	0.700722	0	0	0.92076	0.409753	IFT20	FBF1
cellular response to metal ion (GO:0071248)	1-1	0.642695	0.702041	0	0	0.978362	0.43252	LGMN
organelle assembly (GO:0070925)	3-3	0.647417	0.706458	0	0	0.902425	0.392343	IFT20	FBF1	LSM3
transmembrane receptor protein serine/threonine kinase signaling pathway (GO:0007178)	1-1	0.648284	0.706663	0	0	0.963441	0.417581	USP9Y
regulation of nucleic acid-templated transcription (GO:1903506)	3-3	0.655229	0.713487	0	0	0.891629	0.376954	MYCBP	SPIN4	BACH1
protein localization to plasma membrane (GO:0072659)	1-1	0.656504	0.714129	0	0	0.941888	0.396371	TSPAN14
enzyme linked receptor protein signaling pathway (GO:0007167)	1-1	0.667169	0.723462	0	0	0.914597	0.370148	NTRK1
transcription initiation from RNA polymerase II promoter (GO:0006367)	1-1	0.667169	0.723462	0	0	0.914597	0.370148	POLR2L
protein localization to cell periphery (GO:1990778)	1-1	0.667169	0.723462	0	0	0.914597	0.370148	TSPAN14
positive regulation of cellular catabolic process (GO:0031331)	1-1	0.669784	0.725541	0	0	0.908018	0.363934	APOA5
regulation of cell cycle (GO:0051726)	2-2	0.674576	0.728863	0	0	0.863592	0.339972	TP53I13	PRDM11
protein-DNA complex assembly (GO:0065004)	1-1	0.674951	0.728863	0	0	0.895139	0.351892	PSMB9
neuron development (GO:0048666)	1-1	0.674951	0.728863	0	0	0.895139	0.351892	NPY
negative regulation of cell migration (GO:0030336)	1-1	0.677505	0.730863	0	0	0.888834	0.346057	IGFBP5
nervous system development (GO:0007399)	3-3	0.680867	0.733729	0	0	0.856739	0.329321	TIMM8A	ZC4H2	LSAMP
positive regulation of transferase activity (GO:0051347)	1-1	0.687522	0.740134	0	0	0.864472	0.323885	NTRK1
regulation of G2/M transition of mitotic cell cycle (GO:0010389)	1-1	0.689977	0.74201	0	0	0.858588	0.318619	PSMB9
brain development (GO:0007420)	1-1	0.692413	0.74233	0	0	0.852782	0.313459	NDUFS4
cellular response to organic cyclic compound (GO:0071407)	1-1	0.692413	0.74233	0	0	0.852782	0.313459	IGFBP5
response to cytokine (GO:0034097)	1-1	0.692413	0.74233	0	0	0.852782	0.313459	PTPN14
cilium assembly (GO:0060271)	2-2	0.705733	0.755832	0	0	0.81302	0.283352	IFT20	FBF1
mitotic spindle organization (GO:0007052)	1-1	0.708943	0.758489	0	0	0.814227	0.280078	MZT1
skeletal system development (GO:0001501)	1-1	0.711231	0.759376	0	0	0.808999	0.275673	ADAMTS4
T cell receptor signaling pathway (GO:0050852)	1-1	0.711231	0.759376	0	0	0.808999	0.275673	PSMB9
protein autophosphorylation (GO:0046777)	1-1	0.713502	0.76102	0	0	0.803838	0.271352	NTRK1
transcription by RNA polymerase II (GO:0006366)	2-2	0.715556	0.76243	0	0	0.797435	0.266897	ELOC	POLR2L
proteasome-mediated ubiquitin-dependent protein catabolic process (GO:0043161)	2-2	0.717167	0.763365	0	0	0.794895	0.26426	GID8	PSMB9
positive regulation of protein kinase B signaling (GO:0051897)	1-1	0.717989	0.763459	0	0	0.79371	0.262957	MYORG
peptide biosynthetic process (GO:0043043)	1-1	0.720207	0.765036	0	0	0.78874	0.258878	MRPL41
double-strand break repair (GO:0006302)	1-1	0.72459	0.768907	0	0	0.778983	0.250949	AP5S1
regulation of neuron projection development (GO:0010975)	1-1	0.726756	0.77042	0	0	0.774194	0.247095	NTRK1
neutrophil degranulation (GO:0043312)	3-3	0.727873	0.770819	0	0	0.794405	0.252326	TSPAN14	PTPRN2	NEU1
positive regulation of gene expression (GO:0010628)	3-3	0.72917	0.771409	0	0	0.792705	0.250375	CUX2	DKK1	POLR2L
neutrophil activation involved in immune response (GO:0002283)	3-3	0.733033	0.774049	0	0	0.787649	0.244616	TSPAN14	PTPRN2	NEU1
DNA-templated transcription, initiation (GO:0006352)	1-1	0.733153	0.774049	0	0	0.76017	0.235958	POLR2L
neutrophil mediated immunity (GO:0002446)	3-3	0.736854	0.776888	0	0	0.782656	0.238997	TSPAN14	PTPRN2	NEU1
cell-cell adhesion via plasma-membrane adhesion molecules (GO:0098742)	1-1	0.737334	0.776888	0	0	0.751098	0.22887	HMCN1
intracellular protein transport (GO:0006886)	2-2	0.740421	0.779351	0	0	0.758613	0.227991	RAB28	WLS
cation transport (GO:0006812)	1-1	0.745503	0.783117	0	0	0.733582	0.21545	SLC8A2
neuron differentiation (GO:0030182)	1-1	0.745503	0.783117	0	0	0.733582	0.21545	MTPN
defense response to bacterium (GO:0042742)	1-1	0.749493	0.786514	0	0	0.725124	0.209096	CHGA
glycerophospholipid biosynthetic process (GO:0046474)	1-1	0.751464	0.787788	0	0	0.720968	0.206004	PITPNM2
positive regulation of multicellular organismal process (GO:0051240)	2-2	0.753581	0.789213	0	0	0.738367	0.208898	VIP	APOA5
regulation of immune response (GO:0050776)	1-1	0.75536	0.790282	0	0	0.712794	0.199982	NPDC1
regulated exocytosis (GO:0045055)	1-1	0.757286	0.790707	0	0	0.708776	0.19705	SCG3
positive regulation of cellular biosynthetic process (GO:0031328)	1-1	0.757286	0.790707	0	0	0.708776	0.19705	APOA5
antigen receptor-mediated signaling pathway (GO:0050851)	1-1	0.766689	0.799723	0	0	0.689341	0.18314	PSMB9
regulation of mitotic cell cycle phase transition (GO:1901990)	1-1	0.772157	0.80462	0	0	0.678178	0.175355	PSMB9
negative regulation of macromolecule metabolic process (GO:0010605)	1-1	0.782713	0.81399	0	0	0.656895	0.160932	LGMN
cellular response to tumor necrosis factor (GO:0071356)	1-1	0.782713	0.81399	0	0	0.656895	0.160932	PSMB9
negative regulation of intracellular signal transduction (GO:1902532)	1-1	0.789478	0.820206	0	0	0.643426	0.152095	TBC1D7
endomembrane system organization (GO:0010256)	1-1	0.791137	0.82111	0	0	0.640143	0.149976	LMAN2
modification-dependent protein catabolic process (GO:0019941)	1-1	0.794415	0.823691	0	0	0.633677	0.145841	ELOC
generation of neurons (GO:0048699)	1-1	0.796035	0.824549	0	0	0.630493	0.143823	MTPN
regulation of angiogenesis (GO:0045765)	1-1	0.797642	0.824573	0	0	0.62734	0.141839	ADAMTS1
axon guidance (GO:0007411)	1-1	0.797642	0.824573	0	0	0.62734	0.141839	LAMA1
negative regulation of multicellular organismal process (GO:0051241)	1-1	0.814511	0.840343	0	0	0.594609	0.121994	DKK1
positive regulation of protein modification process (GO:0031401)	1-1	0.814511	0.840343	0	0	0.594609	0.121994	NTRK1
positive regulation of cell motility (GO:2000147)	1-1	0.824511	0.849818	0	0	0.575484	0.111048	MIEN1
regulation of cell migration (GO:0030334)	2-2	0.830562	0.855208	0	0	0.621777	0.115435	MIEN1	IGFBP5
protein modification by small protein conjugation (GO:0032446)	2-2	0.831589	0.855419	0	0	0.620218	0.114379	URM1	ELOC
inflammatory response (GO:0006954)	1-1	0.836584	0.859708	0	0	0.552613	0.0986017	SCG2
apoptotic process (GO:0006915)	1-1	0.837874	0.860184	0	0	0.550182	0.0973206	IFI27L2
membrane organization (GO:0061024)	1-1	0.851407	0.873217	0	0	0.524776	0.0844178	TGOLN2
positive regulation of phosphorylation (GO:0042327)	1-1	0.863818	0.885073	0	0	0.501587	0.0734289	NTRK1
positive regulation of cell differentiation (GO:0045597)	1-1	0.869113	0.889623	0	0	0.491703	0.068977	ZC4H2
central nervous system development (GO:0007417)	1-1	0.879098	0.89896	0	0	0.473046	0.0609562	NDUFS4
positive regulation of cell migration (GO:0030335)	1-1	0.880054	0.899054	0	0	0.471257	0.0602135	MIEN1
DNA metabolic process (GO:0006259)	1-1	0.887435	0.905706	0	0	0.45741	0.0546239	BACH1
DNA repair (GO:0006281)	1-1	0.904733	0.92163	0	0	0.424612	0.0425104	BACH1
positive regulation of transcription, DNA-templated (GO:0045893)	6-6	0.905248	0.92163	0	0	0.634393	0.0631516	BCL2L12	MLLT11	GAL	TNIP2	MED10	PRDM11
negative regulation of transcription by RNA polymerase II (GO:0000122)	3-3	0.905694	0.92163	0	0	0.551755	0.0546535	CUX2	BACH1	DKK1
innate immune response (GO:0045087)	1-1	0.907714	0.922784	0	0	0.418883	0.0405586	CHGA
positive regulation of nucleic acid-templated transcription (GO:1903508)	2-2	0.911057	0.925278	0	0	0.493328	0.0459536	MLLT11	PRDM11
protein polyubiquitination (GO:0000209)	1-1	0.916115	0.929508	0	0	0.402577	0.0352712	PSMB9
protein ubiquitination (GO:0016567)	2-2	0.918724	0.931248	0	0	0.479775	0.0406701	ELOC	PSMB9
positive regulation of transcription by RNA polymerase II (GO:0045944)	4-4	0.927824	0.939464	0	0	0.551351	0.0413037	BCL2L12	GAL	TNIP2	MED10
positive regulation of cytokine production (GO:0001819)	1-1	0.929027	0.939464	0	0	0.376859	0.0277433	POLR2L
negative regulation of cellular macromolecule biosynthetic process (GO:2000113)	2-2	0.929537	0.939464	0	0	0.459883	0.0336032	IGFBP5	PRDM11
cellular response to DNA damage stimulus (GO:0006974)	1-1	0.937022	0.945698	0	0	0.360385	0.0234425	BACH1
supramolecular fiber organization (GO:0097435)	1-1	0.937522	0.945698	0	0	0.359336	0.0231827	TSPAN14
negative regulation of transcription, DNA-templated (GO:0045892)	4-4	0.941617	0.948909	0	0	0.526873	0.0316952	CUX2	PRDM11	BACH1	DKK1
positive regulation of protein phosphorylation (GO:0001934)	1-1	0.946733	0.953142	0	0	0.339564	0.0185873	NTRK1
cytokine-mediated signaling pathway (GO:0019221)	2-2	0.956792	0.962338	0	0	0.403353	0.0178159	TNIP2	PSMB9
phosphorylation (GO:0016310)	1-1	0.957743	0.962365	0	0	0.314415	0.0135752	NTRK1
negative regulation of nucleic acid-templated transcription (GO:1903507)	1-1	0.974681	0.978441	0	0	0.270062	0.00692577	PRDM11
cellular response to cytokine stimulus (GO:0071345)	1-1	0.978084	0.980911	0	0	0.259714	0.00575508	PTPN14
protein phosphorylation (GO:0006468)	1-1	0.980414	0.982301	0	0	0.252186	0.00498839	NTRK1
regulation of transcription by RNA polymerase II (GO:0006357)	10-6	0.982231	0.983176	0	0	0.55044	0.0098686	BCL2L12	PGBD1	GAL	CUX2	TNIP2	ZNF319	MED10	ELOC	BACH1	DKK1
regulation of transcription, DNA-templated (GO:0006355)	10-44	0.985085	0.985085	0	0	0.539912	0.00811343	PGBD1	MLLT11	MYCBP	CUX2	SPIN4	ZNF319	ELOC	PRDM11	BACH1	POLR2L

## Sheet: Down CC_CBD
Term	Overlap	P-value	Adjusted P-value	Old P-value	Old Adjusted P-value	Odds Ratio	Combined Score	Genes
mitochondrial respiratory chain complex I (GO:0005747)	11-42	1.58137e-14	1.05161e-12	0	0	48.4857	1540.77	NDUFB8;NDUFA7;NDUFA6;NDUFA12;NDUFS6;NDUFA2;NDUFAB1;NDUFS4;NDUFA1;NDUFV3;NDUFV1
respiratory chain complex I (GO:0045271)	11-42	1.58137e-14	1.05161e-12	0	0	48.4857	1540.77	NDUFB8;NDUFA7;NDUFA6;NDUFA12;NDUFS6;NDUFA2;NDUFAB1;NDUFS4;NDUFA1;NDUFV3;NDUFV1
mitochondrial inner membrane (GO:0005743)	15-328	4.54548e-08	2.01516e-06	0	0	6.63823	112.23	NDUFB8;NDUFA7;NDUFA6;NDUFA12;NDUFA2;PSEN2;NDUFA1;COX7C;MRPL41;NDUFS6;NDUFS4;NDUFAB1;NDUFV3;NDUFV1;SLC25A14
organelle inner membrane (GO:0019866)	15-346	9.13903e-08	3.03873e-06	0	0	6.27145	101.649	NDUFB8;NDUFA7;NDUFA6;NDUFA12;NDUFA2;PSEN2;NDUFA1;COX7C;MRPL41;NDUFS6;NDUFS4;NDUFAB1;NDUFV3;NDUFV1;SLC25A14
mitochondrial membrane (GO:0031966)	17-469	1.60766e-07	4.27639e-06	0	0	5.24709	82.0818	IFI27L2;NDUFB8;NDUFA7;NDUFA6;NDUFA12;NDUFA2;PSEN2;NDUFA1;COX7C;MRPL41;NDUFS6;FUNDC1;NDUFS4;NDUFAB1;NDUFV3;NDUFV1;SLC25A14
endoplasmic reticulum lumen (GO:0005788)	9-285	0.000410511	0.00909967	0	0	4.34073	33.8495	TGOLN2;TSPAN14;IGFBP5;VGF;IGFBP4;SCG3;SCG2;APOA5;CHGB
mitochondrial envelope (GO:0005740)	6-127	0.000486482	0.00924316	0	0	6.52	49.7366	IFI27L2;TIMM8A;NDUFA6;NDUFA2;NDUFAB1;NDUFA1
neuronal dense core vesicle (GO:0098992)	2-22	0.000595257	0.00989615	0	0	85.8918	637.877	CHGA;NPY
U6 snRNP (GO:0005688)	2-22	0.00123727	0.0182841	0	0	51.5299	344.985	LSM5;LSM3
intracellular organelle lumen (GO:0070013)	14-848	0.00665199	0.073899	0	0	2.24727	11.2652	NDUFB8;ALAS1;IGFBP5;IGFBP4;APOA5;TXN2;TGOLN2;TSPAN14;VGF;NDUFAB1;SCG3;PDSS1;SCG2;CHGB
dense core granule (GO:0031045)	2-22	0.00675186	0.073899	0	0	18.3952	91.9379	CHGA;NPY
U2-type precatalytic spliceosome (GO:0071005)	3-50	0.00697737	0.073899	0	0	8.25907	41.007	SF3B5;LSM5;LSM3
spliceosomal snRNP complex (GO:0097525)	3-51	0.00737163	0.073899	0	0	8.0866	39.7061	SF3B5;LSM5;LSM3
precatalytic spliceosome (GO:0071011)	3-52	0.00777884	0.073899	0	0	7.92117	38.4679	SF3B5;LSM5;LSM3
high-density lipoprotein particle (GO:0034364)	2-22	0.00947534	0.0840147	0	0	15.1467	70.5693	APOA5;PLTP
integral component of plasma membrane (GO:0005887)	19-1454	0.0185205	0.153952	0	0	1.77914	7.09679	NTRK1;SLC26A2;PTPRN2;PLPPR2;PLPPR4;PSEN2;SLC39A10;SLC6A2;SLC8A2;TSPAN31;LMBR1;TSPAN14;TSPAN13;GRM7;LMAN2;SLC25A14;JAM2;CACNG4;STRA6
spliceosomal tri-snRNP complex (GO:0097526)	2-32	0.0257297	0.190114	0	0	8.57749	31.3945	LSM5;LSM3
U4/U6 x U5 tri-snRNP complex (GO:0046540)	2-32	0.0257297	0.190114	0	0	8.57749	31.3945	LSM5;LSM3
lytic vacuole (GO:0000323)	5-219	0.0287625	0.1979	0	0	3.03738	10.7787	NEU1;IDS;AP5S1;SIDT2;LGMN
lysosomal lumen (GO:0043202)	3-86	0.0297593	0.1979	0	0	4.66832	16.4073	NEU1;IDS;LGMN
U2-type spliceosomal complex (GO:0005684)	3-89	0.0324753	0.205677	0	0	4.50479	15.4391	SF3B5;LSM5;LSM3
chromaffin granule (GO:0042583)	1-22	0.0383999	0.212799	0	0	32	104.31	CHGA
endolysosome lumen (GO:0036021)	1-22	0.0383999	0.212799	0	0	32	104.31	LGMN
spermatoproteasome complex (GO:1990111)	1-22	0.0383999	0.212799	0	0	32	104.31	PSMB9
low-density lipoprotein particle (GO:0034362)	1-22	0.0533464	0.269674	0	0	21.3312	62.5206	APOA5
gamma-secretase complex (GO:0070765)	1-22	0.0533464	0.269674	0	0	21.3312	62.5206	PSEN2
mitochondrial matrix (GO:0005759)	6-348	0.055543	0.269674	0	0	2.28094	6.59327	NDUFB8;NDUFA7;ALAS1;NDUFAB1;PDSS1;TXN2
neuron to neuron synapse (GO:0098984)	1-22	0.0607329	0.269674	0	0	18.2829	51.2155	GRM7
intrinsic component of the cytoplasmic side of the plasma membrane (GO:0031235)	1-22	0.0607329	0.269674	0	0	18.2829	51.2155	MIEN1
late endosome (GO:0005770)	4-189	0.0608288	0.269674	0	0	2.79644	7.82918	NTRK1;STARD3;AP5S1;LGMN
cis-Golgi network (GO:0005801)	2-57	0.0730418	0.29605	0	0	4.67273	12.2272	IFT20;SLC35C2
mitochondrial respiratory chain complex IV (GO:0005751)	1-22	0.0753345	0.29605	0	0	14.2186	36.7668	COX7C
chylomicron (GO:0042627)	1-22	0.0753345	0.29605	0	0	14.2186	36.7668	APOA5
cytoplasmic vesicle membrane (GO:0030659)	6-380	0.0776231	0.29605	0	0	2.08235	5.32226	NTRK1;PTPRN2;SCG3;PAM;CACNG4;WLS
bounding membrane of organelle (GO:0098588)	10-767	0.0779078	0.29605	0	0	1.72699	4.40767	IFT20;NTRK1;PTPRN2;LMAN2;MGAT4B;SCG3;PAM;CACNG4;MBTPS2;WLS
lysosome (GO:0005764)	7-477	0.0803816	0.296966	0	0	1.93657	4.88203	STARD3;NEU1;PSEN2;IDS;AP5S1;SIDT2;LGMN
asymmetric synapse (GO:0032279)	3-133	0.0859692	0.309024	0	0	2.97345	7.29616	GRM7;MAPK8IP2;SLC8A2
postsynaptic density (GO:0014069)	3-138	0.0935234	0.327332	0	0	2.8626	6.78306	MAPK8IP2;CACNG4;SLC8A2
RNA polymerase I complex (GO:0005736)	1-22	0.096815	0.330164	0	0	10.6624	24.8961	POLR2L
RNA polymerase II, core complex (GO:0005665)	1-22	0.110859	0.335097	0	0	9.13825	20.0995	POLR2L
trans-Golgi network transport vesicle (GO:0030140)	1-22	0.110859	0.335097	0	0	9.13825	20.0995	TGOLN2
triglyceride-rich plasma lipoprotein particle (GO:0034385)	1-22	0.110859	0.335097	0	0	9.13825	20.0995	APOA5
very-low-density lipoprotein particle (GO:0034361)	1-22	0.110859	0.335097	0	0	9.13825	20.0995	APOA5
keratin filament (GO:0045095)	1-22	0.110859	0.335097	0	0	9.13825	20.0995	FBF1
endocytic vesicle membrane (GO:0030666)	3-158	0.126262	0.372172	0	0	2.4907	5.15426	TGOLN2;CACNG4;WLS
vacuolar lumen (GO:0005775)	3-161	0.13149	0.372172	0	0	2.44304	4.9565	NEU1;IDS;LGMN
RNA polymerase III complex (GO:0005666)	1-22	0.13152	0.372172	0	0	7.52448	15.2642	POLR2L
Cul2-RING ubiquitin ligase complex (GO:0031462)	1-22	0.1383	0.378209	0	0	7.10609	14.0582	ELOC
AMPA glutamate receptor complex (GO:0032281)	1-22	0.145027	0.378209	0	0	6.73175	12.9979	CACNG4
postsynaptic density membrane (GO:0098839)	1-22	0.145027	0.378209	0	0	6.73175	12.9979	CACNG4
U2 snRNP (GO:0005686)	1-22	0.145027	0.378209	0	0	6.73175	12.9979	SF3B5
mitochondrial outer membrane translocase complex (GO:0005742)	1-22	0.151703	0.380688	0	0	6.39484	12.0596	TOMM40L
postsynaptic specialization membrane (GO:0099634)	1-22	0.151703	0.380688	0	0	6.39484	12.0596	CACNG4
integral component of mitochondrial outer membrane (GO:0031307)	1-22	0.158327	0.382102	0	0	6.09002	11.2245	FUNDC1
Golgi membrane (GO:0000139)	6-472	0.164289	0.382102	0	0	1.66335	3.00422	IFT20;TMEM87A;LMAN2;MGAT4B;MBTPS2;WLS
mitochondrial ribosome (GO:0005761)	1-22	0.164899	0.382102	0	0	5.8129	10.4773	NDUFA7
intrinsic component of mitochondrial outer membrane (GO:0031306)	1-22	0.164899	0.382102	0	0	5.8129	10.4773	FUNDC1
secretory granule membrane (GO:0030667)	4-274	0.166631	0.382102	0	0	1.9078	3.41872	TSPAN14;PTPRN2;SCG3;PAM
early endosome membrane (GO:0031901)	2-97	0.175139	0.38786	0	0	2.69979	4.70352	DKK1;WLS
collagen-containing extracellular matrix (GO:0062023)	5-380	0.176372	0.38786	0	0	1.71912	2.98294	ADAMTS4;ADAMTS1;LAMA1;HMCN1;COCH
endolysosome (GO:0036019)	1-22	0.177891	0.38786	0	0	5.32796	9.19917	LGMN
endosome lumen (GO:0031904)	1-22	0.184311	0.389101	0	0	5.11458	8.64942	LGMN
Golgi cisterna membrane (GO:0032580)	1-22	0.184311	0.389101	0	0	5.11458	8.64942	TMEM87A
nuclear inner membrane (GO:0005637)	1-22	0.197003	0.403099	0	0	4.73524	7.69258	PSEN2
U12-type spliceosomal complex (GO:0005689)	1-22	0.197003	0.403099	0	0	4.73524	7.69258	SF3B5
axon (GO:0030424)	3-204	0.213398	0.428129	0	0	1.9162	2.95976	NTRK1;GRM7;SLC8A2
Golgi stack (GO:0005795)	1-22	0.215674	0.428129	0	0	4.26108	6.53644	MGAT4B
ionotropic glutamate receptor complex (GO:0008328)	1-32	0.221801	0.433817	0	0	4.12341	6.20975	CACNG4
endosome membrane (GO:0010008)	4-325	0.248692	0.478289	0	0	1.60051	2.22717	NTRK1;STARD3;DKK1;WLS
brush border membrane (GO:0031526)	1-37	0.251731	0.478289	0	0	3.54982	4.8966	PEX19
neuromuscular junction (GO:0031594)	1-38	0.257578	0.482506	0	0	3.45371	4.68471	PSEN2
exocytic vesicle membrane (GO:0099501)	1-41	0.274849	0.500753	0	0	3.19419	4.1254	PTPRN2
synaptic vesicle membrane (GO:0030672)	1-41	0.274849	0.500753	0	0	3.19419	4.1254	PTPRN2
cell-cell contact zone (GO:0044291)	1-47	0.308203	0.546546	0	0	2.77672	3.26819	JAM2
Golgi-associated vesicle (GO:0005798)	1-47	0.308203	0.546546	0	0	2.77672	3.26819	TGOLN2
intermediate filament (GO:0005882)	1-50	0.324303	0.549538	0	0	2.60632	2.93492	FBF1
microbody membrane (GO:0031903)	1-52	0.334829	0.549538	0	0	2.50386	2.73956	PEX19
basement membrane (GO:0005604)	1-52	0.334829	0.549538	0	0	2.50386	2.73956	LAMA1
sarcolemma (GO:0042383)	1-52	0.334829	0.549538	0	0	2.50386	2.73956	SLC8A2
peroxisomal membrane (GO:0005778)	1-53	0.340031	0.549538	0	0	2.45558	2.64888	PEX19
Golgi cisterna (GO:0031985)	1-53	0.340031	0.549538	0	0	2.45558	2.64888	TMEM87A
early endosome (GO:0005769)	3-266	0.343756	0.549538	0	0	1.45985	1.55886	NTRK1;DKK1;WLS
lytic vacuole membrane (GO:0098852)	3-267	0.345887	0.549538	0	0	1.45425	1.54389	STARD3;PSEN2;SIDT2
cytoplasmic side of plasma membrane (GO:0009898)	1-55	0.350314	0.549538	0	0	2.3644	2.48008	MIEN1
cell-cell junction (GO:0005911)	3-271	0.354404	0.549538	0	0	1.43225	1.4857	FBF1;HMCN1;JAM2
specific granule (GO:0042581)	2-160	0.35534	0.549538	0	0	1.61812	1.67423	TSPAN14;NEU1
mitochondrial intermembrane space (GO:0005758)	1-58	0.36544	0.55403	0	0	2.23962	2.25451	TIMM8A
tertiary granule (GO:0070820)	2-164	0.366576	0.55403	0	0	1.57784	1.58344	TSPAN14;PTPRN2
ficolin-1-rich granule membrane (GO:0101003)	1-61	0.380217	0.568189	0	0	2.12731	2.05714	PTPRN2
specific granule lumen (GO:0035580)	1-62	0.385066	0.569041	0	0	2.09233	1.9968	NEU1
organelle envelope lumen (GO:0031970)	1-64	0.394651	0.576798	0	0	2.0257	1.88341	TIMM8A
integral component of mitochondrial membrane (GO:0032592)	1-66	0.404088	0.584171	0	0	1.96318	1.77888	FUNDC1
late endosome membrane (GO:0031902)	1-68	0.413379	0.591176	0	0	1.90438	1.68231	STARD3
clathrin-coated endocytic vesicle membrane (GO:0030669)	1-69	0.41797	0.591383	0	0	1.87628	1.63677	TGOLN2
endocytic vesicle (GO:0030139)	2-189	0.434879	0.594171	0	0	1.36516	1.13676	CACNG4;WLS
cation channel complex (GO:0034703)	1-73	0.435981	0.594171	0	0	1.77168	1.47078	CACNG4
tertiary granule membrane (GO:0070821)	1-73	0.435981	0.594171	0	0	1.77168	1.47078	TSPAN14
neuron projection (GO:0043005)	5-556	0.43781	0.594171	0	0	1.15942	0.957648	NTRK1;GRM7;VIP;SLC6A2;SLC8A2
COPII-coated ER to Golgi transport vesicle (GO:0030134)	1-79	0.461963	0.610742	0	0	1.6349	1.26259	LMAN2
clathrin-coated vesicle (GO:0030136)	1-80	0.466177	0.610742	0	0	1.61413	1.23189	TGOLN2
P-body (GO:0000932)	1-80	0.466177	0.610742	0	0	1.61413	1.23189	LSM3
nuclear membrane (GO:0031965)	2-204	0.473944	0.610742	0	0	1.26283	0.942909	PSEN2;MYORG
lysosomal membrane (GO:0005765)	3-330	0.476784	0.610742	0	0	1.17029	0.866827	STARD3;PSEN2;SIDT2
coated vesicle (GO:0030135)	1-84	0.482705	0.610742	0	0	1.53603	1.11877	LMAN2
clathrin-coated endocytic vesicle (GO:0045334)	1-85	0.486757	0.610742	0	0	1.51767	1.09271	TGOLN2
tight junction (GO:0070160)	1-85	0.486757	0.610742	0	0	1.51767	1.09271	JAM2
clathrin-coated vesicle membrane (GO:0030665)	1-90	0.506548	0.62748	0	0	1.43204	0.973983	TGOLN2
specific granule membrane (GO:0035579)	1-91	0.510414	0.62748	0	0	1.41606	0.952345	TSPAN14
cell projection membrane (GO:0031253)	1-92	0.514251	0.62748	0	0	1.40043	0.931346	PEX19
apical junction complex (GO:0043296)	1-98	0.536649	0.648857	0	0	1.3134	0.817477	FBF1
trans-Golgi network (GO:0005802)	2-239	0.558462	0.669148	0	0	1.07442	0.62592	TGOLN2;WLS
cytoplasmic vesicle lumen (GO:0060205)	1-115	0.594689	0.706193	0	0	1.11658	0.580306	SCG3
dendrite (GO:0030425)	2-270	0.624955	0.733056	0	0	0.948633	0.44593	GRM7;SLC8A2
mitochondrial outer membrane (GO:0005741)	1-126	0.628334	0.733056	0	0	1.01775	0.472934	FUNDC1
peroxisome (GO:0005777)	1-128	0.634146	0.733403	0	0	1.00163	0.456217	PEX19
adherens junction (GO:0005912)	1-132	0.6455	0.740099	0	0	0.970845	0.424968	HMCN1
endoplasmic reticulum membrane (GO:0005789)	5-712	0.656027	0.74574	0	0	0.896288	0.377833	STARD3;PGAP1;LMAN2;CDKAL1;MYORG
organelle outer membrane (GO:0031968)	1-142	0.672377	0.757849	0	0	0.901533	0.35785	FUNDC1
cullin-RING ubiquitin ligase complex (GO:0031461)	1-157	0.708943	0.785851	0	0	0.814227	0.280078	ELOC
secretory granule lumen (GO:0034774)	2-316	0.709038	0.785851	0	0	0.807759	0.277744	NEU1;SCG3
membrane raft (GO:0045121)	1-163	0.722407	0.794051	0	0	0.783831	0.254876	PSEN2
ficolin-1-rich granule (GO:0101002)	1-184	0.764838	0.833799	0	0	0.693143	0.185826	PTPRN2
spindle (GO:0005819)	1-192	0.779249	0.842603	0	0	0.663841	0.165578	MZT1
integral component of organelle membrane (GO:0031301)	1-214	0.814511	0.873629	0	0	0.594609	0.121994	WLS
cilium (GO:0005929)	1-237	0.845401	0.899506	0	0	0.536031	0.0900233	IFT20
microtubule cytoskeleton (GO:0015630)	1-331	0.92673	0.978215	0	0	0.381505	0.0290298	MZT1
focal adhesion (GO:0005925)	1-387	0.953119	0.992999	0	0	0.325221	0.0156157	CD99L2
cell-substrate junction (GO:0030055)	1-394	0.955668	0.992999	0	0	0.319314	0.0144792	CD99L2
nucleolus (GO:0005730)	2-733	0.979845	0.999062	0	0	0.339563	0.00691372	TXN2;POLR2L
nuclear lumen (GO:0031981)	1-745	0.99738	0.999062	0	0	0.165626	0.000434542	TXN2
intracellular membrane-bounded organelle (GO:0043231)	26-5192	0.99794	0.999062	0	0	0.568254	0.00117202	SF3B5;MTPN;MYCBP;ZC4H2;URM1;PSEN2;GSKIP;PRDM11;BACH1;BCL2L12;CUX2;NEU1;PLTP;POLR2L;STARD3;NFKBIL1;SLC35C2;USP9Y;LSM5;PTPN14;LSM3;PSMB9;IFT20;VGF;ZNF319;GID8
nucleus (GO:0005634)	21-4484	0.998364	0.999062	0	0	0.536097	0.00087799	SF3B5;MTPN;MYCBP;NFKBIL1;ZC4H2;URM1;USP9Y;PSEN2;GSKIP;PRDM11;LSM5;BACH1;PTPN14;LSM3;PSMB9;BCL2L12;CUX2;ZNF319;GID8;PLTP;POLR2L
intracellular non-membrane-bounded organelle (GO:0043232)	2-1158	0.999062	0.999062	0	0	0.209949	0.000197118	MZT1;TXN2

## Sheet: KEGG Up_CBD
Term	Overlap	P-value	Adjusted P-value	Old P-value	Old Adjusted P-value	Odds Ratio	Combined Score	Genes
Protein processing in endoplasmic reticulum	12-171	5.8685e-07	0.000123239	0	0	6.91765	99.2579	BCAP31	SEC61A1	TRAM1	SAR1A	EIF2AK1	CANX	DNAJB12	SSR1	SEC61B	SEC62	CRYAB	UBE2J1
Protein export	5-22	5.02352e-06	0.000527469	0	0	24.8316	302.979	SEC61A1	SRPRB	SEC61B	SEC62	SEC11C
Mineral absorption	6-60	5.86085e-05	0.00410259	0	0	9.9596	97.0526	MT2A	FTH1	HMOX1	CYBRD1	SLC30A1	FTL
Coronavirus disease	9-232	0.00133726	0.0591442	0	0	3.63619	24.0612	JUN	RPS9	C7	RPS5	RPL13A	RPL26	PLCG1	RPL7	JAK1
Steroid biosynthesis	3-22	0.0014082	0.0591442	0	0	15.6347	102.649	SQLE	MSMO1	LIPA
Vitamin digestion and absorption	3-22	0.00241838	0.0846432	0	0	12.6541	76.2364	SCARB1	MMACHC	SLC19A1
ECM-receptor interaction	5-88	0.00322846	0.0929237	0	0	5.36744	30.7863	FRAS1	COL4A2	SDC4	COL6A1	AGRN
Human T-cell leukemia virus 1 infection	8-219	0.00353995	0.0929237	0	0	3.40241	19.202	JUN	CDKN1A	CRTC3	CREB3L2	CANX	ITGB2	SLC2A1	JAK1
Phagosome	6-152	0.00770669	0.167233	0	0	3.6665	17.84	SCARB1	SEC61A1	ITGB2	CANX	TAP1	SEC61B
HIF-1 signaling pathway	5-109	0.0079635	0.167233	0	0	4.27906	20.6802	LDHA	CDKN1A	SLC2A1	HMOX1	PLCG1
Necroptosis	6-159	0.00950863	0.181528	0	0	3.4975	16.2828	FTH1	TNFRSF10B	TNFRSF10A	SQSTM1	FTL	JAK1
Ferroptosis	3-41	0.0110672	0.193676	0	0	6.98702	31.4679	FTH1	HMOX1	FTL
Complement and coagulation cascades	4-85	0.0157704	0.254753	0	0	4.3806	18.1778	C7	F10	PROS1	ITGB2
Vibrio cholerae infection	3-50	0.0189002	0.283503	0	0	5.6465	22.4086	SEC61A1	SEC61B	PLCG1
Pantothenate and CoA biosynthesis	2-22	0.0231808	0.324531	0	0	9.28336	34.9466	DPYD	COASY
Pathogenic Escherichia coli infection	6-197	0.0247395	0.324706	0	0	2.79624	10.3443	MYO1E	JUN	TNFRSF10B	TNFRSF10A	TMBIM6	CLDN1
Hepatitis C	5-157	0.033074	0.394952	0	0	2.92064	9.95647	SCARB1	CDKN1A	EIF2AK1	CLDN1	JAK1
Ribosome	5-158	0.0338531	0.394952	0	0	2.9014	9.82334	RPS9	RPS5	RPL13A	RPL26	RPL7
Human cytomegalovirus infection	6-225	0.042991	0.454505	0	0	2.43524	7.66313	CDKN1A	GNG5	CREB3L2	TAP1	JAK1	TAPBP
Renal cell carcinoma	3-69	0.0432862	0.454505	0	0	4.01712	12.6134	CDKN1A	JUN	SLC2A1
p53 signaling pathway	3-73	0.0497502	0.493855	0	0	3.7868	11.3632	CDKN1A	TNFRSF10B	TNFRSF10A
Leishmaniasis	3-77	0.0566561	0.493855	0	0	3.58138	10.2813	JUN	ITGB2	JAK1
Lysosome	4-128	0.0574553	0.493855	0	0	2.85527	8.1568	CD63	ENTPD4	CTNS	LIPA
Antigen processing and presentation	3-78	0.0584502	0.493855	0	0	3.53345	10.0335	CANX	TAP1	TAPBP
Relaxin signaling pathway	4-129	0.0587922	0.493855	0	0	2.83229	8.02598	JUN	COL4A2	GNG5	CREB3L2
Natural killer cell mediated cytotoxicity	4-131	0.0615157	0.496857	0	0	2.7874	7.77257	ITGB2	TNFRSF10B	TNFRSF10A	PLCG1
Kaposi sarcoma-associated herpesvirus infection	5-193	0.0684064	0.50314	0	0	2.35703	6.32224	JUN	CDKN1A	GNG5	PLCG1	JAK1
ErbB signaling pathway	3-85	0.0717405	0.50314	0	0	3.23067	8.51184	CDKN1A	JUN	PLCG1
Fluid shear stress and atherosclerosis	4-139	0.0730627	0.50314	0	0	2.62115	6.85809	JUN	SDC4	HMOX1	SQSTM1
Apoptosis	4-142	0.0776578	0.50314	0	0	2.56378	6.5516	JUN	TNFRSF10B	TNFRSF10A	MCL1
Epstein-Barr virus infection	5-202	0.0795933	0.50314	0	0	2.24832	5.6901	JUN	CDKN1A	TAP1	JAK1	TAPBP
PD-L1 expression and PD-1 checkpoint pathway in cancer	3-89	0.0798891	0.50314	0	0	3.07978	7.78296	JUN	PLCG1	JAK1
Viral carcinogenesis	5-203	0.0808934	0.50314	0	0	2.23685	5.62483	JUN	CDKN1A	CREB3L2	H4C1	JAK1
Bile secretion	3-90	0.0819867	0.50314	0	0	3.04422	7.61421	SCARB1	SLC2A1	HMGCR
Small cell lung cancer	3-92	0.0862525	0.50314	0	0	2.97551	7.29142	CDKN1A	COL4A2	TRAF4
Th1 and Th2 cell differentiation	3-92	0.0862525	0.50314	0	0	2.97551	7.29142	JUN	PLCG1	JAK1
ABC transporters	2-45	0.0917566	0.510361	0	0	4.09697	9.78608	ABCA3	TAP1
Human immunodeficiency virus 1 infection	5-212	0.0931004	0.510361	0	0	2.13861	5.07723	JUN	GNG5	TAP1	PLCG1	TAPBP
Choline metabolism in cancer	3-98	0.0995955	0.510361	0	0	2.78674	6.42799	JUN	DGKD	PLCG1
AGE-RAGE signaling pathway in diabetic complications	3-100	0.104218	0.510361	0	0	2.729	6.17102	JUN	COL4A2	PLCG1
Cocaine addiction	2-49	0.105909	0.510361	0	0	3.74753	8.41386	JUN	CREB3L2
PI3K-Akt signaling pathway	7-354	0.107637	0.510361	0	0	1.78949	3.98877	CDKN1A	COL4A2	GNG5	CREB3L2	COL6A1	JAK1	MCL1
Cholesterol metabolism	2-50	0.109534	0.510361	0	0	3.66927	8.11465	SCARB1	LIPA
Cysteine and methionine metabolism	2-50	0.109534	0.510361	0	0	3.66927	8.11465	LDHA	AMD1
N-Glycan biosynthesis	2-50	0.109534	0.510361	0	0	3.66927	8.11465	ST6GAL1	MGAT4A
Hepatitis B	4-162	0.111793	0.510361	0	0	2.23697	4.90144	JUN	CDKN1A	CREB3L2	JAK1
Glucagon signaling pathway	3-107	0.121035	0.529529	0	0	2.54441	5.37297	LDHA	CREB3L2	SLC2A1
Th17 cell differentiation	3-107	0.121035	0.529529	0	0	2.54441	5.37297	JUN	PLCG1	JAK1
Pyrimidine metabolism	2-56	0.131927	0.565402	0	0	3.26058	6.60432	ENTPD4	DPYD
Legionellosis	2-57	0.135756	0.570174	0	0	3.20114	6.39235	SAR1A	ITGB2
Leukocyte transendothelial migration	3-114	0.138772	0.571416	0	0	2.38311	4.70644	ITGB2	PLCG1	CLDN1
Pathways in cancer	9-531	0.148806	0.591655	0	0	1.52964	2.91412	JUN	CDKN1A	COL4A2	TRAF4	GNG5	SLC2A1	HMOX1	PLCG1	JAK1
NOD-like receptor signaling pathway	4-181	0.149323	0.591655	0	0	1.99491	3.79361	JUN	ANTXR2	ANTXR1	JAK1
Cortisol synthesis and secretion	2-65	0.167183	0.634756	0	0	2.79351	4.99665	SCARB1	CREB3L2
Human papillomavirus infection	6-331	0.173121	0.634756	0	0	1.63208	2.86229	BCAP31	CDKN1A	COL4A2	CREB3L2	COL6A1	JAK1
Osteoclast differentiation	3-127	0.173801	0.634756	0	0	2.13185	3.73041	JUN	SQSTM1	JAK1
Nitrogen metabolism	1-22	0.175741	0.634756	0	0	5.48833	9.5428	CA13
Primary bile acid biosynthesis	1-22	0.175741	0.634756	0	0	5.48833	9.5428	HSD3B7
Mitophagy	2-68	0.179272	0.634756	0	0	2.66613	4.58267	JUN	SQSTM1
Amphetamine addiction	2-69	0.183331	0.634756	0	0	2.6262	4.45524	JUN	CREB3L2
Central carbon metabolism in cancer	2-70	0.187404	0.634756	0	0	2.58745	4.33265	LDHA	SLC2A1
Epithelial cell signaling in Helicobacter pylori infection	2-70	0.187404	0.634756	0	0	2.58745	4.33265	JUN	PLCG1
Non-small cell lung cancer	2-72	0.195587	0.636232	0	0	2.51327	4.10103	CDKN1A	PLCG1
Estrogen signaling pathway	3-137	0.202251	0.636232	0	0	1.97176	3.15135	JUN	CREB3L2	EBAG9
Proteoglycans in cancer	4-205	0.202479	0.636232	0	0	1.75456	2.80224	CD63	CDKN1A	SDC4	PLCG1
Glioma	2-75	0.207941	0.636232	0	0	2.40961	3.7843	CDKN1A	PLCG1
Thyroid hormone synthesis	2-75	0.207941	0.636232	0	0	2.40961	3.7843	CREB3L2	CANX
Measles	3-139	0.208069	0.636232	0	0	1.94256	3.0496	JUN	EIF2AK1	JAK1
Pancreatic cancer	2-76	0.212077	0.636232	0	0	2.37693	3.68616	CDKN1A	JAK1
Pertussis	2-76	0.212077	0.636232	0	0	2.37693	3.68616	JUN	ITGB2
Terpenoid backbone biosynthesis	1-22	0.221314	0.654589	0	0	4.18053	6.30497	HMGCR
Lipid and atherosclerosis	4-215	0.226109	0.659485	0	0	1.67055	2.48367	JUN	TNFRSF10B	TNFRSF10A	PLCG1
Mannose type O-glycan biosynthesis	1-22	0.230122	0.661996	0	0	3.9903	5.86233	B3GALNT2
Cell adhesion molecules	3-148	0.234681	0.663714	0	0	1.82115	2.63981	SDC4	ITGB2	CLDN1
Peroxisome	2-82	0.237041	0.663714	0	0	2.19799	3.16406	PEX3	FAR1
Colorectal cancer	2-86	0.253772	0.66798	0	0	2.0929	2.87003	CDKN1A	JUN
Insulin secretion	2-86	0.253772	0.66798	0	0	2.0929	2.87003	CREB3L2	SLC2A1
Cushing syndrome	3-155	0.255776	0.66798	0	0	1.73667	2.36786	SCARB1	CDKN1A	CREB3L2
Biosynthesis of unsaturated fatty acids	1-22	0.264377	0.66798	0	0	3.37573	4.491	TECR
Fatty acid elongation	1-22	0.264377	0.66798	0	0	3.37573	4.491	TECR
Butanoate metabolism	1-22	0.2727	0.66798	0	0	3.25053	4.22369	ACSM6
MicroRNAs in cancer	5-310	0.273823	0.66798	0	0	1.44418	1.87061	CDKN1A	MARCKS	HMOX1	PLCG1	MCL1
JAK-STAT signaling pathway	3-162	0.277123	0.66798	0	0	1.65962	2.12978	CDKN1A	MCL1	JAK1
Hippo signaling pathway	3-163	0.280188	0.66798	0	0	1.64916	2.09822	ID1	ITGB2	DCHS1
Rheumatoid arthritis	2-93	0.283094	0.66798	0	0	1.93122	2.43715	JUN	ITGB2
Chemical carcinogenesis	4-239	0.285265	0.66798	0	0	1.4981	1.87913	PAQR8	JUN	PAQR7	CREB3L2
IL-17 signaling pathway	2-94	0.287278	0.66798	0	0	1.91013	2.38251	JUN	TRAF4
beta-Alanine metabolism	1-22	0.289068	0.66798	0	0	3.02605	3.75562	DPYD
Wnt signaling pathway	3-166	0.289401	0.66798	0	0	1.61856	2.00692	VANGL1	JUN	DAAM1
Hepatocellular carcinoma	3-168	0.295556	0.66798	0	0	1.59878	1.94874	CDKN1A	HMOX1	PLCG1
Fc gamma R-mediated phagocytosis	2-97	0.299814	0.66798	0	0	1.84953	2.22793	MARCKS	PLCG1
Phosphatidylinositol signaling system	2-97	0.299814	0.66798	0	0	1.84953	2.22793	DGKD	PLCG1
Prostate cancer	2-97	0.299814	0.66798	0	0	1.84953	2.22793	CDKN1A	CREB3L2
Aldosterone synthesis and secretion	2-98	0.303985	0.66798	0	0	1.83017	2.17932	SCARB1	CREB3L2
Influenza A	3-172	0.30789	0.66798	0	0	1.56062	1.83843	TNFRSF10B	TNFRSF10A	JAK1
Viral protein interaction with cytokine and cytokine receptor	2-100	0.312314	0.66798	0	0	1.79264	2.08618	TNFRSF10B	TNFRSF10A
Amoebiasis	2-102	0.320622	0.66798	0	0	1.75661	1.99813	COL4A2	ITGB2
Longevity regulating pathway	2-102	0.320622	0.66798	0	0	1.75661	1.99813	CREB3L2	CRYAB
Propanoate metabolism	1-34	0.32071	0.66798	0	0	2.65872	3.02354	LDHA
Protein digestion and absorption	2-103	0.324767	0.66798	0	0	1.73913	1.95591	COL4A2	COL6A1
T cell receptor signaling pathway	2-104	0.328905	0.66798	0	0	1.72199	1.91483	JUN	PLCG1
Tuberculosis	3-180	0.3326	0.66798	0	0	1.48947	1.63963	ITGB2	CEBPG	JAK1
Parathyroid hormone synthesis, secretion and action	2-106	0.337161	0.66798	0	0	1.6887	1.83595	CDKN1A	CREB3L2
African trypanosomiasis	1-37	0.343518	0.66798	0	0	2.43679	2.60375	APOL1
Aldosterone-regulated sodium reabsorption	1-37	0.343518	0.66798	0	0	2.43679	2.60375	HSD11B2
Thyroid cancer	1-37	0.343518	0.66798	0	0	2.43679	2.60375	CDKN1A
Insulin resistance	2-108	0.345386	0.66798	0	0	1.65667	1.76119	CREB3L2	SLC2A1
Ribosome biogenesis in eukaryotes	2-108	0.345386	0.66798	0	0	1.65667	1.76119	RBM28	FCF1
Primary immunodeficiency	1-38	0.35095	0.66798	0	0	2.37081	2.4825	TAP1
Alcoholism	3-186	0.351121	0.66798	0	0	1.4402	1.50735	GNG5	CREB3L2	H4C1
Various types of N-glycan biosynthesis	1-39	0.358298	0.66798	0	0	2.3083	2.36922	MGAT4A
Neutrophil extracellular trap formation	3-189	0.360362	0.66798	0	0	1.41675	1.446	ITGB2	H4C1	PLCG1
TNF signaling pathway	2-112	0.361735	0.66798	0	0	1.5961	1.62299	JUN	CREB3L2
Cholinergic synapse	2-113	0.365799	0.66798	0	0	1.58164	1.59062	GNG5	CREB3L2
Serotonergic synapse	2-113	0.365799	0.66798	0	0	1.58164	1.59062	APP	GNG5
Chemokine signaling pathway	3-192	0.369585	0.668522	0	0	1.39405	1.3876	GNG5	PLCG1	CXCL16
Bladder cancer	1-41	0.372747	0.668522	0	0	2.19267	2.16384	CDKN1A
Fat digestion and absorption	1-43	0.386872	0.668522	0	0	2.08804	1.98293	SCARB1
Porphyrin and chlorophyll metabolism	1-43	0.386872	0.668522	0	0	2.08804	1.98293	HMOX1
Growth hormone synthesis, secretion and action	2-119	0.389964	0.668522	0	0	1.50008	1.41262	CREB3L2	PLCG1
Neurotrophin signaling pathway	2-119	0.389964	0.668522	0	0	1.50008	1.41262	JUN	PLCG1
Vasopressin-regulated water reabsorption	1-44	0.393816	0.668522	0	0	2.03938	1.90044	CREB3L2
AMPK signaling pathway	2-120	0.393953	0.668522	0	0	1.48729	1.38544	CREB3L2	HMGCR
Focal adhesion	3-201	0.397095	0.668522	0	0	1.33007	1.22843	JUN	COL4A2	COL6A1
Thyroid hormone signaling pathway	2-121	0.39793	0.668522	0	0	1.47471	1.35892	SLC2A1	PLCG1
Proteasome	1-46	0.407468	0.679113	0	0	1.94854	1.74939	PSMA6
Other types of O-glycan biosynthesis	1-47	0.414179	0.679513	0	0	1.90609	1.68013	ST6GAL1
Pyruvate metabolism	1-47	0.414179	0.679513	0	0	1.90609	1.68013	LDHA
Amino sugar and nucleotide sugar metabolism	1-48	0.420814	0.685047	0	0	1.86544	1.61465	UXS1
Rap1 signaling pathway	3-210	0.424279	0.685374	0	0	1.27166	1.09027	ID1	ITGB2	PLCG1
Arginine and proline metabolism	1-50	0.433862	0.690234	0	0	1.78912	1.49396	AMD1
Malaria	1-50	0.433862	0.690234	0	0	1.78912	1.49396	ITGB2
Ovarian steroidogenesis	1-51	0.440275	0.690857	0	0	1.75324	1.43828	SCARB1
Dopaminergic synapse	2-132	0.440833	0.690857	0	0	1.34918	1.1051	GNG5	CREB3L2
Systemic lupus erythematosus	2-135	0.452244	0.699308	0	0	1.31854	1.04631	C7	H4C1
Glycosaminoglycan biosynthesis	1-53	0.452886	0.699308	0	0	1.68564	1.33522	EXTL2
Yersinia infection	2-137	0.459778	0.704769	0	0	1.29888	1.00924	JUN	PLCG1
Signaling pathways regulating pluripotency of stem cells	2-143	0.482014	0.724951	0	0	1.24322	0.907284	ID1	JAK1
Endometrial cancer	1-58	0.483188	0.724951	0	0	1.53739	1.11822	CDKN1A
VEGF signaling pathway	1-59	0.489045	0.724951	0	0	1.5108	1.08068	PLCG1
Viral myocarditis	1-60	0.494836	0.724951	0	0	1.48512	1.04483	ITGB2
Breast cancer	2-147	0.496523	0.724951	0	0	1.20868	0.84623	JUN	CDKN1A
Phospholipase D signaling pathway	2-148	0.50011	0.724951	0	0	1.20034	0.831751	DGKD	PLCG1
Glycerolipid metabolism	1-61	0.500561	0.724951	0	0	1.4603	1.01056	DGKD
Steroid hormone biosynthesis	1-61	0.500561	0.724951	0	0	1.4603	1.01056	HSD11B2
Basal cell carcinoma	1-63	0.511819	0.734824	0	0	1.41305	0.946435	CDKN1A
Oxytocin signaling pathway	2-154	0.521284	0.734824	0	0	1.15261	0.750877	JUN	CDKN1A
Inflammatory bowel disease	1-65	0.522825	0.734824	0	0	1.36875	0.887647	JUN
Shigellosis	3-246	0.527926	0.734824	0	0	1.08127	0.690715	JUN	PLCG1	SQSTM1
Cellular senescence	2-156	0.528209	0.734824	0	0	1.13752	0.726039	CDKN1A	SQSTM1
Glycolysis / Gluconeogenesis	1-67	0.533583	0.734824	0	0	1.32714	0.83363	LDHA
Parkinson disease	3-249	0.536103	0.734824	0	0	1.06792	0.665772	PSMA6	PLCG1	UBE2J1
Salmonella infection	3-249	0.536103	0.734824	0	0	1.06792	0.665772	JUN	TNFRSF10B	TNFRSF10A
Fc epsilon RI signaling pathway	1-68	0.538871	0.734824	0	0	1.30726	0.808254	PLCG1
Adipocytokine signaling pathway	1-69	0.5441	0.737167	0	0	1.28797	0.78389	SLC2A1
Melanoma	1-72	0.559434	0.753084	0	0	1.23336	0.716376	CDKN1A
Inositol phosphate metabolism	1-73	0.56443	0.754874	0	0	1.21617	0.695577	PLCG1
PPAR signaling pathway	1-74	0.56937	0.754874	0	0	1.19945	0.675561	DBI
Tight junction	2-169	0.571547	0.754874	0	0	1.04828	0.586416	JUN	CLDN1
Chronic myeloid leukemia	1-76	0.579083	0.760047	0	0	1.16735	0.637733	CDKN1A
Synaptic vesicle cycle	1-78	0.588578	0.767711	0	0	1.13691	0.602615	CPLX1
Prion disease	3-273	0.598515	0.775853	0	0	0.971799	0.498828	PSMA6	C7	CREB3L2
B cell receptor signaling pathway	1-81	0.602422	0.776127	0	0	1.09411	0.554492	JUN
Axon guidance	2-182	0.611939	0.78358	0	0	0.971925	0.477335	EFNB2	PLCG1
Pathways of neurodegeneration	5-475	0.625367	0.795921	0	0	0.929238	0.4362	APP	PSMA6	PLCG1	SQSTM1	UBE2J1
GABAergic synapse	1-89	0.637114	0.802477	0	0	0.994242	0.448211	GNG5
Transcriptional misregulation in cancer	2-192	0.640995	0.802477	0	0	0.920301	0.409289	CDKN1A	PROM1
Morphine addiction	1-91	0.645306	0.802477	0	0	0.972049	0.425788	GNG5
Cytokine-cytokine receptor interaction	3-295	0.650714	0.802477	0	0	0.897567	0.385671	TNFRSF10B	TNFRSF10A	CXCL16
GnRH signaling pathway	1-93	0.653313	0.802477	0	0	0.950821	0.404764	JUN
TGF-beta signaling pathway	1-94	0.657249	0.802477	0	0	0.94055	0.394742	ID1
Staphylococcus aureus infection	1-95	0.66114	0.802477	0	0	0.930496	0.38503	ITGB2
Circadian entrainment	1-97	0.668791	0.802477	0	0	0.911019	0.366487	GNG5
Glycerophospholipid metabolism	1-98	0.672552	0.802477	0	0	0.901581	0.357635	DGKD
Inflammatory mediator regulation of TRP channels	1-98	0.672552	0.802477	0	0	0.901581	0.357635	PLCG1
mRNA surveillance pathway	1-98	0.672552	0.802477	0	0	0.901581	0.357635	MAGOHB
Melanogenesis	1-101	0.683582	0.805473	0	0	0.8744	0.33263	CREB3L2
Chagas disease	1-102	0.687175	0.805473	0	0	0.865699	0.324781	JUN
C-type lectin receptor signaling pathway	1-104	0.694241	0.805473	0	0	0.848803	0.309758	JUN
NF-kappa B signaling pathway	1-104	0.694241	0.805473	0	0	0.848803	0.309758	PLCG1
Toll-like receptor signaling pathway	1-104	0.694241	0.805473	0	0	0.848803	0.309758	JUN
cAMP signaling pathway	2-216	0.70373	0.811997	0	0	0.816088	0.286741	JUN	CREB3L2
Drug metabolism	1-108	0.7079	0.812344	0	0	0.816906	0.282202	DPYD
Toxoplasmosis	1-112	0.720951	0.822824	0	0	0.787307	0.257595	JAK1
Glutamatergic synapse	1-114	0.727257	0.825535	0	0	0.773294	0.246275	GNG5
Ras signaling pathway	2-232	0.740306	0.835829	0	0	0.758696	0.228134	GNG5	PLCG1
Cell cycle	1-124	0.756722	0.849794	0	0	0.710063	0.197937	CDKN1A
Purine metabolism	1-129	0.770243	0.860378	0	0	0.682153	0.178076	ENTPD4
FoxO signaling pathway	1-131	0.775439	0.861599	0	0	0.67159	0.170802	CDKN1A
Apelin signaling pathway	1-137	0.790337	0.864432	0	0	0.641765	0.151004	GNG5
Autophagy	1-137	0.790337	0.864432	0	0	0.641765	0.151004	SQSTM1
Insulin signaling pathway	1-137	0.790337	0.864432	0	0	0.641765	0.151004	RHOQ
Ubiquitin mediated proteolysis	1-140	0.797413	0.864615	0	0	0.627818	0.142127	UBE2J1
Spinocerebellar ataxia	1-143	0.804251	0.864615	0	0	0.61446	0.133856	PSMA6
Retrograde endocannabinoid signaling	1-148	0.815141	0.864615	0	0	0.593409	0.121289	GNG5
Gastric cancer	1-149	0.817245	0.864615	0	0	0.589369	0.118944	CDKN1A
Herpes simplex virus 1 infection	4-498	0.817433	0.864615	0	0	0.703213	0.141758	EIF2AK1	TAP1	JAK1	TAPBP
Adrenergic signaling in cardiomyocytes	1-150	0.819326	0.864615	0	0	0.585384	0.116651	CREB3L2
Spliceosome	1-150	0.819326	0.864615	0	0	0.585384	0.116651	MAGOHB
Non-alcoholic fatty liver disease	1-155	0.829381	0.87085	0	0	0.566234	0.105929	JUN
cGMP-PKG signaling pathway	1-167	0.851296	0.889414	0	0	0.52498	0.0845191	CREB3L2
Huntington disease	2-306	0.863144	0.897328	0	0	0.57184	0.0841598	PSMA6	CREB3L2
RNA transport	1-186	0.880405	0.910764	0	0	0.470607	0.0599425	MAGOHB
Diabetic cardiomyopathy	1-203	0.901603	0.92812	0	0	0.430627	0.044605	SLC2A1
Regulation of actin cytoskeleton	1-218	0.917175	0.936497	0	0	0.400553	0.0346307	ITGB2
Amyotrophic lateral sclerosis	2-364	0.919449	0.936497	0	0	0.478788	0.0402087	PSMA6	SQSTM1
Alzheimer disease	2-369	0.923119	0.936497	0	0	0.472144	0.0377702	APP	PSMA6
Thermogenesis	1-232	0.929485	0.938423	0	0	0.376008	0.0274953	CREB3L2
Calcium signaling pathway	1-240	0.935683	0.94016	0	0	0.363273	0.0241497	PLCG1
MAPK signaling pathway	1-294	0.96547	0.96547	0	0	0.295502	0.0103841	JUN

## Sheet: Up BP_CBD
Term	Overlap	P-value	Adjusted P-value	Old P-value	Old Adjusted P-value	Odds Ratio	Combined Score	Genes
cotranslational protein targeting to membrane (GO:0006613)	9-94	1.18491e-06	0.00173945	0	0	9.60699	131.096	SEC61A1	TRAM1	RPS9	RPS5	RPL13A	SSR1	RPL26	SEC62	RPL7
cellular transition metal ion homeostasis (GO:0046916)	8-96	1.32575e-05	0.00908545	0	0	8.20934	92.1987	APP	MT2A	NDFIP1	FTH1	HMOX1	CYBRD1	SLC30A1	FTL
protein targeting to ER (GO:0045047)	8-8	2.22171e-05	0.00908545	0	0	7.60174	81.4499	SEC61A1	RPS9	RPS5	SRPRB	RPL13A	RPL26	SEC62	RPL7
organic substance transport (GO:0071702)	9-9	2.4756e-05	0.00908545	0	0	6.41616	68.0527	PEX3	SLCO2B1	ABCA3	SLC22A18	CMTM6	TAP1	SLC19A1	CD320	APOL2
protein insertion into membrane (GO:0051205)	5-34	3.75421e-05	0.00949132	0	0	15.4041	156.969	APP	TRAM1	CCDC47	HMOX1	SEC61B
regulation of phospholipid transport (GO:2001138)	3-22	4.81928e-05	0.00949132	0	0	66.491	660.941	PRELID1	ABCA3	DBI
posttranslational protein targeting to membrane, translocation (GO:0031204)	3-22	4.81928e-05	0.00949132	0	0	66.491	660.941	SEC61A1	SEC61B	SEC62
protein insertion into ER membrane (GO:0045048)	5-37	5.7212e-05	0.00949132	0	0	13.9579	136.351	APP	TRAM1	CCDC47	HMOX1	SEC61B
ERAD pathway (GO:0036503)	7-87	5.81893e-05	0.00949132	0	0	7.86861	76.7332	CCDC47	DNAJB12	TRIM13	TMUB1	SEC61B	FAM8A1	UBE2J1
SRP-dependent cotranslational protein targeting to membrane (GO:0006614)	7-90	7.23033e-05	0.0106141	0	0	7.58304	72.3016	SEC61A1	RPS9	RPS5	RPL13A	SEC61B	RPL26	RPL7
endoplasmic reticulum organization (GO:0007029)	6-73	0.000176406	0.0215804	0	0	8.02185	69.3306	APP	SEC61A1	TRAM1	CCDC47	HMOX1	SEC61B
ubiquitin-dependent ERAD pathway (GO:0030433)	6-73	0.000176406	0.0215804	0	0	8.02185	69.3306	DNAJB12	TRIM13	TMUB1	SEC61B	FAM8A1	UBE2J1
positive regulation of phospholipid transport (GO:2001140)	3-22	0.000219713	0.0248107	0	0	33.2388	279.977	PRELID1	ABCA3	DBI
posttranslational protein targeting to endoplasmic reticulum membrane (GO:0006620)	3-22	0.000290512	0.0304622	0	0	29.5441	240.603	SEC61A1	SEC61B	SEC62
positive regulation of lipid transport (GO:0032370)	3-22	0.000374522	0.0366532	0	0	26.5883	209.778	PRELID1	ABCA3	DBI
cellular response to topologically incorrect protein (GO:0035967)	4-32	0.00044532	0.0388082	0	0	12.7066	98.053	DNAJB12	TMBIM6	TM7SF3	HSPA13
maturation of LSU-rRNA from tricistronic rRNA transcript (SSU-rRNA, 5.8S rRNA, LSU-rRNA) (GO:0000463)	3-22	0.000472699	0.0388082	0	0	24.17	185.071	NIFK	RPL7L1	RPL7
cellular iron ion homeostasis (GO:0006879)	5-58	0.000496158	0.0388082	0	0	8.41842	64.0526	NDFIP1	FTH1	HMOX1	CYBRD1	FTL
antigen processing and presentation of peptide antigen via MHC class I (GO:0002474)	4-33	0.000502286	0.0388082	0	0	12.2678	93.1903	BCAP31	CANX	TAP1	TAPBP
interleukin-27-mediated signaling pathway (GO:0070106)	3-22	0.000585962	0.0430096	0	0	22.1547	164.881	CANX	CRLF1	JAK1
iron ion homeostasis (GO:0055072)	5-61	0.000626771	0.0438143	0	0	7.96622	58.7503	NDFIP1	FTH1	HMOX1	CYBRD1	FTL
steroid biosynthetic process (GO:0006694)	5-65	0.000839028	0.0559861	0	0	7.43363	52.6544	HSD11B2	HSD3B7	SQLE	MSMO1	HMGCR
regulation of cellular protein catabolic process (GO:1903362)	3-22	0.0010249	0.0629237	0	0	17.7211	121.977	PTTG1IP	ATRAID	VGLL4
sterol metabolic process (GO:0016125)	5-70	0.00117464	0.0629237	0	0	6.86008	46.2835	SQLE	MSMO1	HMGCR	LIPA	APOL2
negative regulation of calcium ion transport (GO:0051926)	3-22	0.00120697	0.0629237	0	0	16.6127	111.631	SEMG1	SLC30A1	TMBIM6
drug transport (GO:0015893)	2-22	0.00124304	0.0629237	0	0	58.8423	393.666	ABCA3	SLC19A1
intracellular sequestering of iron ion (GO:0006880)	2-22	0.00124304	0.0629237	0	0	58.8423	393.666	FTH1	FTL
SRP-dependent cotranslational protein targeting to membrane, translocation (GO:0006616)	2-22	0.00124304	0.0629237	0	0	58.8423	393.666	SEC61A1	SEC61B
medium-chain fatty acid catabolic process (GO:0051793)	2-22	0.00124304	0.0629237	0	0	58.8423	393.666	ABHD3	ABHD2
lipid transport (GO:0006869)	6-6	0.00149942	0.0733717	0	0	5.20856	33.8696	SCARB1	PRELID1	PEX3	SLCO2B1	ABCA3	APOL2
response to endoplasmic reticulum stress (GO:0034976)	6-6	0.00157124	0.0744058	0	0	5.15822	33.3009	BCAP31	JUN	CCDC47	CREB3L2	DNAJB12	TNFRSF10B
nuclear-transcribed mRNA catabolic process, nonsense-mediated decay (GO:0000184)	6-6	0.00180247	0.079906	0	0	5.01283	31.6741	RPS9	RPS5	RPL13A	RPL26	MAGOHB	RPL7
medium-chain fatty acid biosynthetic process (GO:0051792)	2-22	0.00185068	0.079906	0	0	44.1295	277.671	ABHD3	ABHD2
vesicle fusion with endoplasmic reticulum-Golgi intermediate compartment (ERGIC) membrane (GO:1990668)	2-22	0.00185068	0.079906	0	0	44.1295	277.671	TAP1	TAPBP
cellular amide metabolic process (GO:0043603)	6-6	0.00197036	0.0826426	0	0	4.92035	30.6515	ST6GAL1	ORMDL2	ACSM6	DBI	AEBP1	SLC19A1
response to gamma radiation (GO:0010332)	3-22	0.00241838	0.0965648	0	0	12.6541	76.2364	TRIM13	RPL26	CRYAB
organic hydroxy compound biosynthetic process (GO:1901617)	4-50	0.00243385	0.0965648	0	0	7.72738	46.5055	HSD3B7	SQLE	MSMO1	HMGCR
negative regulation of neurotransmitter secretion (GO:0046929)	2-22	0.00257168	0.0968009	0	0	35.3018	210.511	SYT11	SLC30A1
TRAIL-activated apoptotic signaling pathway (GO:0036462)	2-22	0.00257168	0.0968009	0	0	35.3018	210.511	TNFRSF10B	TNFRSF10A
organophosphate ester transport (GO:0015748)	3-22	0.00272543	0.100023	0	0	12.0783	71.3237	SCARB1	PRELID1	ABCA3
cellular protein metabolic process (GO:0044267)	12-12	0.00290895	0.104155	0	0	2.68176	15.6614	APP	RPS9	GOLM1	ABCA3	RPS5	MGAT4A	MXRA8	RPL13A	RPL26	APOL1	RPL7	SEC11C
maturation of LSU-rRNA (GO:0000470)	3-22	0.00305546	0.104903	0	0	11.5525	66.8988	NIFK	RPL7L1	RPL7
protein targeting to membrane (GO:0006612)	5-87	0.00307276	0.104903	0	0	5.43318	31.4319	SEC61A1	TRAM1	PEX3	SSR1	SEC62
negative regulation of calcium ion import (GO:0090281)	2-22	0.00340343	0.108791	0	0	29.4167	167.174	SEMG1	SLC30A1
negative regulation of long-term synaptic potentiation (GO:1900272)	2-22	0.00340343	0.108791	0	0	29.4167	167.174	APP	PTN
cellular response to unfolded protein (GO:0034620)	3-22	0.003409	0.108791	0	0	11.0706	62.896	TMBIM6	TM7SF3	HSPA13
receptor clustering (GO:0043113)	3-22	0.00378656	0.118269	0	0	10.6273	59.2608	ITGB2	PTN	AGRN
cytoplasmic translation (GO:0002181)	5-93	0.0040933	0.125187	0	0	5.06119	27.8285	RPS9	RPS5	RPL13A	RPL26	RPL7
transition metal ion homeostasis (GO:0055076)	3-22	0.00418862	0.125488	0	0	10.218	55.9475	HMOX1	CYBRD1	FTL
protein N-linked glycosylation via asparagine (GO:0018279)	3-22	0.00461564	0.132858	0	0	9.83906	52.9175	ST6GAL1	OSTC	UBE2J1
regulation of long-term synaptic potentiation (GO:1900271)	3-22	0.00461564	0.132858	0	0	9.83906	52.9175	APP	PTN	SQSTM1
peptidyl-asparagine modification (GO:0018196)	3-22	0.00506806	0.140376	0	0	9.48719	50.1379	ST6GAL1	OSTC	UBE2J1
vitamin transport (GO:0051180)	3-22	0.00506806	0.140376	0	0	9.48719	50.1379	GC	SLC19A1	CD320
amino sugar metabolic process (GO:0006040)	2-22	0.0053889	0.143835	0	0	22.0603	115.23	EXTL2	ST6GAL1
toxin transport (GO:1901998)	2-22	0.0053889	0.143835	0	0	22.0603	115.23	ANTXR2	ANTXR1
endodermal cell differentiation (GO:0035987)	3-32	0.00554627	0.145392	0	0	9.15958	47.5806	COL4A2	ITGB2	COL6A1
regulation of neurotransmitter secretion (GO:0046928)	3-33	0.00605067	0.155831	0	0	8.85381	45.2216	SYT11	SLC30A1	CPLX1
interleukin-35-mediated signaling pathway (GO:0070757)	2-22	0.00653762	0.15839	0	0	19.6081	98.6325	CANX	JAK1
negative regulation of extrinsic apoptotic signaling pathway via death domain receptors (GO:1902042)	3-34	0.00658162	0.15839	0	0	8.56777	43.04	HMOX1	TNFRSF10B	TNFRSF10A
response to steroid hormone (GO:0048545)	3-34	0.00658162	0.15839	0	0	8.56777	43.04	PAQR8	PAQR7	ABHD2
secondary alcohol biosynthetic process (GO:1902653)	3-34	0.00658162	0.15839	0	0	8.56777	43.04	SQLE	MSMO1	HMGCR
protein N-linked glycosylation (GO:0006487)	4-67	0.00698071	0.165285	0	0	5.63735	27.9872	ST6GAL1	MGAT4A	OSTC	UBE2J1
cholesterol biosynthetic process (GO:0006695)	3-35	0.00713945	0.16636	0	0	8.29961	41.0177	SQLE	MSMO1	HMGCR
endoderm formation (GO:0001706)	3-36	0.00772448	0.173203	0	0	8.0477	39.1389	COL4A2	ITGB2	COL6A1
macrophage activation (GO:0042116)	3-36	0.00772448	0.173203	0	0	8.0477	39.1389	APP	CRTC3	ITGB2
glomerular visceral epithelial cell differentiation (GO:0072112)	2-22	0.00778704	0.173203	0	0	17.6464	85.6786	MYO1E	PROM1
wound healing (GO:0042060)	4-70	0.00813508	0.178243	0	0	5.38029	25.8876	SCARB1	SYT11	HMOX1	CLDN1
fatty acid biosynthetic process (GO:0006633)	4-71	0.008546	0.184493	0	0	5.29972	25.2388	ABHD3	ABHD2	TECR	ACSM6
sterol biosynthetic process (GO:0016126)	3-38	0.00897729	0.188871	0	0	7.58706	35.7582	SQLE	MSMO1	HMGCR
regulation of retrograde protein transport, ER to cytosol (GO:1904152)	2-22	0.00913478	0.188871	0	0	16.0414	75.325	BCAP31	UBE2J1
positive regulation of protein exit from endoplasmic reticulum (GO:0070863)	2-22	0.00913478	0.188871	0	0	16.0414	75.325	BCAP31	SAR1A
negative regulation of secretion by cell (GO:1903531)	3-39	0.00964561	0.196663	0	0	7.37593	34.2336	SYT11	SLC30A1	HMGCR
rRNA metabolic process (GO:0016072)	6-6	0.0103661	0.204331	0	0	3.42972	15.6711	RPS9	NIFK	FCF1	RPL13A	RPL26	RPL7
cellular copper ion homeostasis (GO:0006878)	2-22	0.0105785	0.204331	0	0	14.7039	66.8869	APP	MT2A
negative regulation of viral transcription (GO:0032897)	2-22	0.0105785	0.204331	0	0	14.7039	66.8869	IFITM3	TRIM13
positive regulation of long-term synaptic potentiation (GO:1900273)	2-22	0.0105785	0.204331	0	0	14.7039	66.8869	APP	SQSTM1
water-soluble vitamin metabolic process (GO:0006767)	4-76	0.0108041	0.205979	0	0	4.93043	22.3241	SLC2A1	MMACHC	SLC19A1	CD320
cholesterol metabolic process (GO:0008203)	4-77	0.0112975	0.212625	0	0	4.86264	21.8001	SQLE	MSMO1	HMGCR	APOL2
regulation of extrinsic apoptotic signaling pathway via death domain receptors (GO:1902041)	3-42	0.0118209	0.21958	0	0	6.80752	30.211	HMOX1	TNFRSF10B	TNFRSF10A
regulation of amyloid fibril formation (GO:1905906)	2-22	0.0121158	0.21958	0	0	13.5721	59.8971	APP	CRYAB
medium-chain fatty acid metabolic process (GO:0051791)	2-22	0.0121158	0.21958	0	0	13.5721	59.8971	ABHD3	ABHD2
negative regulation of extrinsic apoptotic signaling pathway (GO:2001237)	4-80	0.012864	0.226706	0	0	4.66999	20.3299	HMOX1	TNFRSF10B	TNFRSF10A	MCL1
glycerophospholipid metabolic process (GO:0006650)	4-80	0.012864	0.226706	0	0	4.66999	20.3299	ABHD3	ABCA3	FAR1	PLCG1
nuclear-transcribed mRNA catabolic process (GO:0000956)	6-6	0.0132664	0.226706	0	0	3.24116	14.01	RPS9	RPS5	RPL13A	RPL26	MAGOHB	RPL7
intracellular protein transmembrane transport (GO:0065002)	3-44	0.013415	0.226706	0	0	6.47479	27.9153	SEC61A1	SEC61B	SEC62
lymphocyte chemotaxis (GO:0048247)	3-44	0.013415	0.226706	0	0	6.47479	27.9153	HSD3B7	CKLF	CXCL16
activation of NF-kappaB-inducing kinase activity (GO:0007250)	2-22	0.0137444	0.226706	0	0	12.602	54.0265	TNFRSF10B	TNFRSF10A
porphyrin-containing compound catabolic process (GO:0006787)	2-22	0.0137444	0.226706	0	0	12.602	54.0265	SLCO2B1	HMOX1
heme catabolic process (GO:0042167)	2-22	0.0137444	0.226706	0	0	12.602	54.0265	SLCO2B1	HMOX1
peptide metabolic process (GO:0006518)	4-83	0.0145628	0.236443	0	0	4.49196	18.9978	CTNS	AEBP1	MMACHC	SEC11C
vascular transport (GO:0010232)	4-84	0.015159	0.236443	0	0	4.43559	18.5814	SLCO2B1	SLC2A1	SLC5A3	SLC19A1
pyrimidine-containing compound catabolic process (GO:0072529)	2-22	0.0154622	0.236443	0	0	11.7613	49.0371	DPYD	TET2
cellular response to gamma radiation (GO:0071480)	2-22	0.0154622	0.236443	0	0	11.7613	49.0371	RPL26	CRYAB
copper ion homeostasis (GO:0055070)	2-22	0.0154622	0.236443	0	0	11.7613	49.0371	APP	MT2A
establishment of protein localization to endoplasmic reticulum (GO:0072599)	2-22	0.0154622	0.236443	0	0	11.7613	49.0371	SEC61A1	SRPRB
modified amino acid transport (GO:0072337)	2-22	0.0154622	0.236443	0	0	11.7613	49.0371	CTNS	SLC19A1
transport across blood-brain barrier (GO:0150104)	4-86	0.0163972	0.248155	0	0	4.32696	17.7866	SLCO2B1	SLC2A1	SLC5A3	SLC19A1
cellular response to ionizing radiation (GO:0071479)	3-48	0.0169538	0.251396	0	0	5.89806	24.0479	CDKN1A	RPL26	CRYAB
cognition (GO:0050890)	3-48	0.0169538	0.251396	0	0	5.89806	24.0479	APP	CTNS	DGCR2
cellular response to mechanical stimulus (GO:0071260)	3-49	0.0179122	0.257795	0	0	5.76955	23.2067	PIEZO1	TNFRSF10B	TNFRSF10A
response to unfolded protein (GO:0006986)	3-49	0.0179122	0.257795	0	0	5.76955	23.2067	TMBIM6	TM7SF3	HSPA13
positive regulation of reactive oxygen species metabolic process (GO:2000379)	3-49	0.0179122	0.257795	0	0	5.76955	23.2067	CDKN1A	ITGB2	SLC5A3
regulation of oligodendrocyte differentiation (GO:0048713)	2-22	0.0191563	0.270398	0	0	10.3766	41.0407	TMEM98	PTN
positive regulation of cellular protein catabolic process (GO:1903364)	2-22	0.0191563	0.270398	0	0	10.3766	41.0407	PTTG1IP	VGLL4
negative regulation of transport (GO:0051051)	3-51	0.0199178	0.27847	0	0	5.52859	21.6507	NDFIP1	SYT11	CRYAB
negative regulation of protein metabolic process (GO:0051248)	3-52	0.0209652	0.284553	0	0	5.41548	20.9303	EIF2AK1	HMGCR	CRYAB
endoplasmic reticulum calcium ion homeostasis (GO:0032469)	2-22	0.0211283	0.284553	0	0	9.7996	37.7985	BCAP31	CCDC47
glucose transmembrane transport (GO:1904659)	2-22	0.0211283	0.284553	0	0	9.7996	37.7985	SLC2A1	SLC5A3
xenobiotic transport (GO:0042908)	2-22	0.0211283	0.284553	0	0	9.7996	37.7985	ABCA3	SLC22A18
IRE1-mediated unfolded protein response (GO:0036498)	3-53	0.0220422	0.294163	0	0	5.30691	20.2448	EXTL2	SSR1	SRPRB
protein localization to organelle (GO:0033365)	5-5	0.0227203	0.300481	0	0	3.24289	12.2727	APP	TRAM1	CCDC47	HMOX1	SEC61B
cobalamin metabolic process (GO:0009235)	2-22	0.0231808	0.303141	0	0	9.28336	34.9466	MMACHC	CD320
receptor-mediated endocytosis (GO:0006898)	5-5	0.0233345	0.303141	0	0	3.21923	12.0973	SCARB1	ITGB2	CANX	APOL1	CXCL16
tetrapyrrole metabolic process (GO:0033013)	2-22	0.0253118	0.323111	0	0	8.81875	32.422	MMACHC	CD320
microglial cell activation (GO:0001774)	2-22	0.0253118	0.323111	0	0	8.81875	32.422	APP	ITGB2
blood vessel endothelial cell migration (GO:0043534)	2-22	0.0275193	0.345284	0	0	8.39838	30.1743	EFNB2	ID1
hexose transmembrane transport (GO:0008645)	2-22	0.0275193	0.345284	0	0	8.39838	30.1743	SLC2A1	SLC5A3
phospholipid transport (GO:0015914)	3-59	0.0291281	0.362374	0	0	4.73687	16.7498	SCARB1	PRELID1	ABCA3
negative regulation of synaptic transmission (GO:0050805)	2-22	0.0298012	0.363566	0	0	8.01623	28.1627	SYT11	SLC30A1
long-chain fatty-acyl-CoA metabolic process (GO:0035336)	2-22	0.0298012	0.363566	0	0	8.01623	28.1627	TECR	FAR1
proteasome-mediated ubiquitin-dependent protein catabolic process (GO:0043161)	8-8	0.0299669	0.363566	0	0	2.28168	8.00335	PCNP	PSMA6	TRIM13	TMUB1	DNAJB12	SEC61B	FAM8A1	UBE2J1
regulation of DNA-templated transcription, initiation (GO:2000142)	3-61	0.0317267	0.38068	0	0	4.57306	15.7798	CDKN1A	JUN	MED26
regulation of calcium ion import (GO:0090279)	2-22	0.0321556	0.38068	0	0	7.66731	26.3539	SEMG1	SLC30A1
peripheral nervous system development (GO:0007422)	2-22	0.0321556	0.38068	0	0	7.66731	26.3539	ADGRG6	SERPINI1
amyloid fibril formation (GO:1990000)	3-63	0.0344427	0.390495	0	0	4.42018	14.8892	APP	SEMG1	ITM2B
negative regulation of protein transport (GO:0051224)	2-22	0.0345806	0.390495	0	0	7.34747	24.7203	NDFIP1	HMGCR
chaperone cofactor-dependent protein refolding (GO:0051085)	2-22	0.0345806	0.390495	0	0	7.34747	24.7203	DNAJB12	HSPA13
regulation of myelination (GO:0031641)	2-22	0.0345806	0.390495	0	0	7.34747	24.7203	TMEM98	PTN
glial cell development (GO:0021782)	2-22	0.0345806	0.390495	0	0	7.34747	24.7203	APP	MXRA8
positive regulation of filopodium assembly (GO:0051491)	2-22	0.0345806	0.390495	0	0	7.34747	24.7203	AGRN	RHOQ
negative regulation of intrinsic apoptotic signaling pathway (GO:2001243)	3-64	0.0358445	0.399608	0	0	4.3475	14.4709	TMBIM6	PTTG1IP	MCL1
cellular response to cadmium ion (GO:0071276)	2-22	0.0370743	0.399608	0	0	7.05321	23.2391	MT2A	JUN
positive regulation of striated muscle cell differentiation (GO:0051155)	2-22	0.0370743	0.399608	0	0	7.05321	23.2391	EFNB2	PIEZO1
peptide biosynthetic process (GO:0043043)	5-5	0.037083	0.399608	0	0	2.8269	9.3135	RPS9	RPS5	RPL13A	RPL26	RPL7
positive regulation of cell death (GO:0010942)	3-66	0.038735	0.399608	0	0	4.20905	13.6837	EFNB2	ITGB2	TRIM13
amide transport (GO:0042886)	2-22	0.0396349	0.399608	0	0	6.78159	21.8913	TAP1	SLC19A1
cellular zinc ion homeostasis (GO:0006882)	2-22	0.0396349	0.399608	0	0	6.78159	21.8913	MT2A	SLC30A1
positive regulation of monooxygenase activity (GO:0032770)	2-22	0.0396349	0.399608	0	0	6.78159	21.8913	SCARB1	POR
positive regulation of response to wounding (GO:1903036)	2-22	0.0396349	0.399608	0	0	6.78159	21.8913	PTN	CLDN1
regulation of I-kappaB kinase/NF-kappaB signaling (GO:0043122)	6-6	0.0422252	0.399608	0	0	2.44654	7.74265	NDFIP1	TRAF4	TRIM13	HMOX1	TNFRSF10B	SQSTM1
glial cell differentiation (GO:0010001)	2-29	0.0422606	0.399608	0	0	6.53009	20.6606	NFIB	ADGRG6
response to cadmium ion (GO:0046686)	2-29	0.0422606	0.399608	0	0	6.53009	20.6606	MT2A	JUN
positive regulation of viral genome replication (GO:0045070)	2-29	0.0422606	0.399608	0	0	6.53009	20.6606	TOP2A	TMEM39A
extrinsic apoptotic signaling pathway via death domain receptors (GO:0008625)	2-30	0.0449495	0.399608	0	0	6.29656	19.5333	TNFRSF10B	TNFRSF10A
positive regulation of endopeptidase activity (GO:0010950)	2-30	0.0449495	0.399608	0	0	6.29656	19.5333	PRELID1	SEMG1
zinc ion homeostasis (GO:0055069)	2-30	0.0449495	0.399608	0	0	6.29656	19.5333	MT2A	SLC30A1
regulation of endopeptidase activity (GO:0052548)	3-71	0.0464623	0.399608	0	0	3.89858	11.9652	PRELID1	SERPINI1	SERPINB7
supramolecular fiber organization (GO:0097435)	8-8	0.0466128	0.399608	0	0	2.0789	6.37367	APP	MYO1E	MARCKS	COL4A2	SEMG1	COL6A1	RHOBTB3	ITM2B
rRNA processing (GO:0006364)	5-5	0.0469149	0.399608	0	0	2.64033	8.07786	RPS9	FCF1	RPL13A	RPL26	RPL7
'de novo' posttranslational protein folding (GO:0051084)	2-31	0.0476999	0.399608	0	0	6.07913	18.4977	DNAJB12	HSPA13
purine nucleoside bisphosphate metabolic process (GO:0034032)	2-31	0.0476999	0.399608	0	0	6.07913	18.4977	ACSM6	DBI
aminoglycan catabolic process (GO:0006026)	2-31	0.0476999	0.399608	0	0	6.07913	18.4977	SDC4	AGRN
ribonucleoside bisphosphate metabolic process (GO:0033875)	2-31	0.0476999	0.399608	0	0	6.07913	18.4977	ACSM6	DBI
cell junction organization (GO:0034330)	3-72	0.0480923	0.399608	0	0	3.84188	11.6587	APP	AGRN	CLDN1
extrinsic apoptotic signaling pathway (GO:0097191)	3-72	0.0480923	0.399608	0	0	3.84188	11.6587	TNFRSF10B	TNFRSF10A	MCL1
response to ionizing radiation (GO:0010212)	3-72	0.0480923	0.399608	0	0	3.84188	11.6587	IKBIP	CDKN1A	TRIM13
antigen processing and presentation of exogenous peptide antigen via MHC class I, TAP-dependent (GO:0002479)	3-73	0.0497502	0.399608	0	0	3.7868	11.3632	PSMA6	TAP1	TAPBP
chondrocyte differentiation (GO:0002062)	2-32	0.0505102	0.399608	0	0	5.87619	17.5438	NFIB	CREB3L2
NIK/NF-kappaB signaling (GO:0038061)	3-74	0.0514358	0.399608	0	0	3.73328	11.0782	PSMA6	TNFRSF10B	TNFRSF10A
negative regulation of smooth muscle cell proliferation (GO:0048662)	2-33	0.0533786	0.399608	0	0	5.68635	16.663	CDKN1A	HMOX1
regulated exocytosis (GO:0045055)	5-5	0.0539051	0.399608	0	0	2.53381	7.40006	APP	CD63	SYT11	PROS1	CPLX1
negative regulation of autophagosome maturation (GO:1901097)	1-22	0.0552426	0.399608	0	0	21.9667	63.6159	TMEM39A
negative regulation of calcium ion transport into cytosol (GO:0010523)	1-22	0.0552426	0.399608	0	0	21.9667	63.6159	TMBIM6
negative regulation of cardiac muscle cell proliferation (GO:0060044)	1-22	0.0552426	0.399608	0	0	21.9667	63.6159	VGLL4
negative regulation of ceramide biosynthetic process (GO:1900060)	1-22	0.0552426	0.399608	0	0	21.9667	63.6159	ORMDL2
pyrimidine ribonucleotide metabolic process (GO:0009218)	1-22	0.0552426	0.399608	0	0	21.9667	63.6159	ENTPD4
anion homeostasis (GO:0055081)	1-22	0.0552426	0.399608	0	0	21.9667	63.6159	CYBRD1
apoptotic chromosome condensation (GO:0030263)	1-22	0.0552426	0.399608	0	0	21.9667	63.6159	TOP2A
axon choice point recognition (GO:0016198)	1-22	0.0552426	0.399608	0	0	21.9667	63.6159	APP
cadmium ion transmembrane transport (GO:0070574)	1-22	0.0552426	0.399608	0	0	21.9667	63.6159	SLC30A1
cadmium ion transport (GO:0015691)	1-22	0.0552426	0.399608	0	0	21.9667	63.6159	SLC30A1
camera-type eye photoreceptor cell differentiation (GO:0060219)	1-22	0.0552426	0.399608	0	0	21.9667	63.6159	PROM1
regulation of cellular response to vascular endothelial growth factor stimulus (GO:1902547)	1-22	0.0552426	0.399608	0	0	21.9667	63.6159	CD63
negative regulation of myelination (GO:0031642)	1-22	0.0552426	0.399608	0	0	21.9667	63.6159	TMEM98
cellular response to erythropoietin (GO:0036018)	1-22	0.0552426	0.399608	0	0	21.9667	63.6159	MT2A
negative regulation of sphingolipid biosynthetic process (GO:0090155)	1-22	0.0552426	0.399608	0	0	21.9667	63.6159	ORMDL2
neutral lipid catabolic process (GO:0046461)	1-22	0.0552426	0.399608	0	0	21.9667	63.6159	ABHD2
cyclic-GMP-AMP transmembrane import across plasma membrane (GO:0140361)	1-22	0.0552426	0.399608	0	0	21.9667	63.6159	SLC19A1
disaccharide biosynthetic process (GO:0046351)	1-22	0.0552426	0.399608	0	0	21.9667	63.6159	SLC2A1
regulation of neutrophil degranulation (GO:0043313)	1-22	0.0552426	0.399608	0	0	21.9667	63.6159	ITGB2
folate transmembrane transport (GO:0098838)	1-22	0.0552426	0.399608	0	0	21.9667	63.6159	SLC19A1
glucose import across plasma membrane (GO:0098708)	1-22	0.0552426	0.399608	0	0	21.9667	63.6159	SLC2A1
response to mitochondrial depolarisation (GO:0098780)	1-22	0.0552426	0.399608	0	0	21.9667	63.6159	SQSTM1
positive regulation of intrinsic apoptotic signaling pathway by p53 class mediator (GO:1902255)	1-22	0.0552426	0.399608	0	0	21.9667	63.6159	RPL26
Schwann cell differentiation (GO:0014037)	1-22	0.0552426	0.399608	0	0	21.9667	63.6159	ADGRG6
positive regulation of oxidative stress-induced neuron death (GO:1903223)	1-22	0.0552426	0.399608	0	0	21.9667	63.6159	MCL1
purine ribonucleotide metabolic process (GO:0009150)	3-77	0.0566561	0.399608	0	0	3.58138	10.2813	ACSM6	DBI	RHOQ
phosphatidylcholine metabolic process (GO:0046470)	3-77	0.0566561	0.399608	0	0	3.58138	10.2813	ABHD3	ABCA3	DBI
negative regulation of apoptotic signaling pathway (GO:2001234)	3-78	0.0584502	0.399608	0	0	3.53345	10.0335	PRELID1	TMBIM6	MCL1
antigen processing and presentation of exogenous peptide antigen via MHC class I (GO:0042590)	3-78	0.0584502	0.399608	0	0	3.53345	10.0335	PSMA6	TAP1	TAPBP
regulation of organelle organization (GO:0033043)	3-80	0.0621178	0.399608	0	0	3.44133	9.56249	SAR1A	SYT11	SQSTM1
response to interferon-gamma (GO:0034341)	3-80	0.0621178	0.399608	0	0	3.44133	9.56249	IFITM3	RPL13A	CXCL16
negative regulation of DNA metabolic process (GO:0051053)	2-36	0.0623159	0.399608	0	0	5.18382	14.3879	H1-4	CDKN1A
calcium-dependent cell-cell adhesion via plasma membrane cell adhesion molecules (GO:0016339)	2-36	0.0623159	0.399608	0	0	5.18382	14.3879	PCDHGC3	DCHS1
dendrite morphogenesis (GO:0048813)	2-36	0.0623159	0.399608	0	0	5.18382	14.3879	MAP6	PTN
positive regulation of bone mineralization (GO:0030501)	2-36	0.0623159	0.399608	0	0	5.18382	14.3879	PTN	ATRAID
transition metal ion transport (GO:0000041)	2-36	0.0623159	0.399608	0	0	5.18382	14.3879	FTH1	SLC30A1
acyl-CoA metabolic process (GO:0006637)	2-37	0.0654004	0.399608	0	0	5.03546	13.7328	ACSM6	DBI
regulation of vascular associated smooth muscle cell proliferation (GO:1904705)	2-37	0.0654004	0.399608	0	0	5.03546	13.7328	CDKN1A	JUN
protein localization to perinuclear region of cytoplasm (GO:1905719)	1-22	0.065921	0.399608	0	0	17.5724	47.7847	SQSTM1
negative regulation of cardiac muscle tissue growth (GO:0055022)	1-22	0.065921	0.399608	0	0	17.5724	47.7847	VGLL4
negative regulation of cellular response to hypoxia (GO:1900038)	1-22	0.065921	0.399608	0	0	17.5724	47.7847	TMBIM6
negative regulation of endoplasmic reticulum calcium ion concentration (GO:0032471)	1-22	0.065921	0.399608	0	0	17.5724	47.7847	BCAP31
axo-dendritic transport (GO:0008088)	1-22	0.065921	0.399608	0	0	17.5724	47.7847	APP
B cell chemotaxis (GO:0035754)	1-22	0.065921	0.399608	0	0	17.5724	47.7847	HSD3B7
regulation of collagen fibril organization (GO:1904026)	1-22	0.065921	0.399608	0	0	17.5724	47.7847	AEBP1
cellular lipid biosynthetic process (GO:0097384)	1-22	0.065921	0.399608	0	0	17.5724	47.7847	FAR1
regulation of extracellular exosome assembly (GO:1903551)	1-22	0.065921	0.399608	0	0	17.5724	47.7847	SDC4
regulation of hepatocyte proliferation (GO:2000345)	1-22	0.065921	0.399608	0	0	17.5724	47.7847	PTN
negative regulation of transporter activity (GO:0032410)	1-22	0.065921	0.399608	0	0	17.5724	47.7847	NDFIP1
cholesterol import (GO:0070508)	1-22	0.065921	0.399608	0	0	17.5724	47.7847	SCARB1
cobalamin transport (GO:0015889)	1-22	0.065921	0.399608	0	0	17.5724	47.7847	CD320
endoplasmic reticulum localization (GO:0051643)	1-22	0.065921	0.399608	0	0	17.5724	47.7847	POLR2M
regulation of protein lipidation (GO:1903059)	1-22	0.065921	0.399608	0	0	17.5724	47.7847	DBI
regulation of serine-type endopeptidase activity (GO:1900003)	1-22	0.065921	0.399608	0	0	17.5724	47.7847	SEMG1
positive regulation of cell-cell adhesion mediated by integrin (GO:0033634)	1-22	0.065921	0.399608	0	0	17.5724	47.7847	PIEZO1
positive regulation of cholesterol storage (GO:0010886)	1-22	0.065921	0.399608	0	0	17.5724	47.7847	SCARB1
glomerular epithelial cell differentiation (GO:0072311)	1-22	0.065921	0.399608	0	0	17.5724	47.7847	PROM1
positive regulation of epithelial cell differentiation involved in kidney development (GO:2000698)	1-22	0.065921	0.399608	0	0	17.5724	47.7847	PROM1
glycerol ether biosynthetic process (GO:0046504)	1-22	0.065921	0.399608	0	0	17.5724	47.7847	FAR1
renal filtration cell differentiation (GO:0061318)	1-22	0.065921	0.399608	0	0	17.5724	47.7847	PROM1
guanine nucleotide transmembrane transport (GO:1903790)	1-22	0.065921	0.399608	0	0	17.5724	47.7847	SLC19A1
hexose import across plasma membrane (GO:0140271)	1-22	0.065921	0.399608	0	0	17.5724	47.7847	SLC2A1
sialylation (GO:0097503)	1-22	0.065921	0.399608	0	0	17.5724	47.7847	ST6GAL1
leukocyte chemotaxis involved in inflammatory response (GO:0002232)	1-22	0.065921	0.399608	0	0	17.5724	47.7847	PTN
sterol import (GO:0035376)	1-22	0.065921	0.399608	0	0	17.5724	47.7847	SCARB1
transmembrane receptor protein tyrosine phosphatase signaling pathway (GO:0007185)	1-22	0.065921	0.399608	0	0	17.5724	47.7847	PTN
vesicle localization (GO:0051648)	1-22	0.065921	0.399608	0	0	17.5724	47.7847	SYT11
pronephros development (GO:0048793)	1-22	0.065921	0.399608	0	0	17.5724	47.7847	SEC61A1
negative regulation of amyloid precursor protein biosynthetic process (GO:0042985)	1-22	0.065921	0.399608	0	0	17.5724	47.7847	ITM2B
ribosome biogenesis (GO:0042254)	5-5	0.067221	0.399608	0	0	2.36976	6.3978	RPS9	FCF1	RPL13A	RPL26	RPL7
regulation of T cell differentiation (GO:0045580)	2-39	0.0717182	0.399608	0	0	4.76279	12.55	PRELID1	CLPTM1
Wnt signaling pathway, planar cell polarity pathway (GO:0060071)	3-85	0.0717405	0.399608	0	0	3.23067	8.51184	VANGL1	PSMA6	DAAM1
carboxylic acid metabolic process (GO:0019752)	2-40	0.0749485	0.399608	0	0	4.63722	12.0148	ST6GAL1	SLC2A1
organic hydroxy compound transport (GO:0015850)	2-40	0.0749485	0.399608	0	0	4.63722	12.0148	SLCO2B1	SLC5A3
response to organonitrogen compound (GO:0010243)	2-40	0.0749485	0.399608	0	0	4.63722	12.0148	CCDC47	DNAJB12
positive regulation of ossification (GO:0045778)	2-40	0.0749485	0.399608	0	0	4.63722	12.0148	PTN	ATRAID
negative regulation of catecholamine secretion (GO:0033604)	1-22	0.0764792	0.399608	0	0	14.643	37.6432	SYT11
atrioventricular valve formation (GO:0003190)	1-22	0.0764792	0.399608	0	0	14.643	37.6432	DCHS1
negative regulation of intracellular transport (GO:0032387)	1-22	0.0764792	0.399608	0	0	14.643	37.6432	CRYAB
negative regulation of low-density lipoprotein receptor activity (GO:1905598)	1-22	0.0764792	0.399608	0	0	14.643	37.6432	APP
negative regulation of nervous system process (GO:0031645)	1-22	0.0764792	0.399608	0	0	14.643	37.6432	TMEM98
negative regulation of oligodendrocyte differentiation (GO:0048715)	1-22	0.0764792	0.399608	0	0	14.643	37.6432	TMEM98
regulation of dopamine metabolic process (GO:0042053)	1-22	0.0764792	0.399608	0	0	14.643	37.6432	ITGB2
regulation of hemoglobin biosynthetic process (GO:0046984)	1-22	0.0764792	0.399608	0	0	14.643	37.6432	EIF2AK1
chemical homeostasis within a tissue (GO:0048875)	1-22	0.0764792	0.399608	0	0	14.643	37.6432	ABCA3
neuron projection arborization (GO:0140058)	1-22	0.0764792	0.399608	0	0	14.643	37.6432	PTN
collagen-activated tyrosine kinase receptor signaling pathway (GO:0038063)	1-22	0.0764792	0.399608	0	0	14.643	37.6432	COL4A2
cyclic nucleotide transport (GO:0070729)	1-22	0.0764792	0.399608	0	0	14.643	37.6432	SLC19A1
nucleobase catabolic process (GO:0046113)	1-22	0.0764792	0.399608	0	0	14.643	37.6432	DPYD
dendrite arborization (GO:0140059)	1-22	0.0764792	0.399608	0	0	14.643	37.6432	PTN
detection of molecule of bacterial origin (GO:0032490)	1-22	0.0764792	0.399608	0	0	14.643	37.6432	SCARB1
peptide transport (GO:0015833)	1-22	0.0764792	0.399608	0	0	14.643	37.6432	TAP1
DNA ligation (GO:0006266)	1-22	0.0764792	0.399608	0	0	14.643	37.6432	TOP2A
regulation of oxidative stress-induced neuron intrinsic apoptotic signaling pathway (GO:1903376)	1-22	0.0764792	0.399608	0	0	14.643	37.6432	MCL1
pexophagy (GO:0000425)	1-22	0.0764792	0.399608	0	0	14.643	37.6432	SQSTM1
polyamine biosynthetic process (GO:0006596)	1-22	0.0764792	0.399608	0	0	14.643	37.6432	AMD1
positive regulation of cardiac muscle cell differentiation (GO:2000727)	1-22	0.0764792	0.399608	0	0	14.643	37.6432	EFNB2
glomerular epithelial cell development (GO:0072310)	1-22	0.0764792	0.399608	0	0	14.643	37.6432	MYO1E
glomerular visceral epithelial cell development (GO:0072015)	1-22	0.0764792	0.399608	0	0	14.643	37.6432	MYO1E
positive regulation of ER-associated ubiquitin-dependent protein catabolic process (GO:1903071)	1-22	0.0764792	0.399608	0	0	14.643	37.6432	BCAP31
heart trabecula formation (GO:0060347)	1-22	0.0764792	0.399608	0	0	14.643	37.6432	ADGRG6
positive regulation of integrin-mediated signaling pathway (GO:2001046)	1-22	0.0764792	0.399608	0	0	14.643	37.6432	CD63
positive regulation of lymphocyte apoptotic process (GO:0070230)	1-22	0.0764792	0.399608	0	0	14.643	37.6432	PRELID1
iron import into cell (GO:0033212)	1-22	0.0764792	0.399608	0	0	14.643	37.6432	CYBRD1
surfactant homeostasis (GO:0043129)	1-22	0.0764792	0.399608	0	0	14.643	37.6432	ABCA3
protein localization to endoplasmic reticulum exit site (GO:0070973)	1-22	0.0764792	0.399608	0	0	14.643	37.6432	BCAP31
negative regulation of binding (GO:0051100)	3-88	0.0778154	0.399608	0	0	3.11617	7.95688	CDKN1A	JUN	TMBIM6
regulation of establishment of planar polarity (GO:0090175)	3-88	0.0778154	0.399608	0	0	3.11617	7.95688	VANGL1	PSMA6	DAAM1
acylglycerol metabolic process (GO:0006639)	2-41	0.0782245	0.399608	0	0	4.51809	11.5129	DGKD	ABHD2
regulation of filopodium assembly (GO:0051489)	2-41	0.0782245	0.399608	0	0	4.51809	11.5129	AGRN	RHOQ
cortical cytoskeleton organization (GO:0030865)	2-41	0.0782245	0.399608	0	0	4.51809	11.5129	RHOBTB3	RHOQ
positive regulation of biomineral tissue development (GO:0070169)	2-41	0.0782245	0.399608	0	0	4.51809	11.5129	PTN	ATRAID
regulation of viral transcription (GO:0046782)	2-41	0.0782245	0.399608	0	0	4.51809	11.5129	IFITM3	TRIM13
import into cell (GO:0098657)	2-41	0.0782245	0.399608	0	0	4.51809	11.5129	SLC5A3	SLC19A1
ncRNA processing (GO:0034470)	5-5	0.0783045	0.399608	0	0	2.2599	5.75632	RPS9	FCF1	RPL13A	RPL26	RPL7
transforming growth factor beta receptor signaling pathway (GO:0007179)	3-89	0.0798891	0.399608	0	0	3.07978	7.78296	TWSG1	JUN	ID1
post-Golgi vesicle-mediated transport (GO:0006892)	3-89	0.0798891	0.399608	0	0	3.07978	7.78296	APP	FTH1	FTL
regulation of chemokine production (GO:0032642)	2-42	0.0815447	0.399608	0	0	4.40491	11.0414	APP	HMOX1
negative regulation of protein catabolic process (GO:0042177)	2-42	0.0815447	0.399608	0	0	4.40491	11.0414	HMGCR	ATRAID
proteasomal protein catabolic process (GO:0010498)	5-5	0.0835277	0.399608	0	0	2.21425	5.49706	PCNP	PSMA6	CCDC47	TRIM13	DNAJB12
anion transport (GO:0006820)	2-43	0.0849077	0.399608	0	0	4.29726	10.5979	SLCO2B1	SLC19A1
glutathione metabolic process (GO:0006749)	2-43	0.0849077	0.399608	0	0	4.29726	10.5979	CTNS	MMACHC
negative regulation of CD4-positive, alpha-beta T cell proliferation (GO:2000562)	1-22	0.0869187	0.399608	0	0	12.5505	30.6581	TWSG1
pyrimidine nucleobase catabolic process (GO:0006208)	1-22	0.0869187	0.399608	0	0	12.5505	30.6581	DPYD
negative regulation of chromosome organization (GO:2001251)	1-22	0.0869187	0.399608	0	0	12.5505	30.6581	TOP2A
antigen processing and presentation of endogenous peptide antigen via MHC class I (GO:0019885)	1-22	0.0869187	0.399608	0	0	12.5505	30.6581	TAP1
aromatic compound catabolic process (GO:0019439)	1-22	0.0869187	0.399608	0	0	12.5505	30.6581	TET2
regulation of CD4-positive, alpha-beta T cell activation (GO:2000514)	1-22	0.0869187	0.399608	0	0	12.5505	30.6581	TWSG1
negative regulation of microglial cell activation (GO:1903979)	1-22	0.0869187	0.399608	0	0	12.5505	30.6581	SYT11
negative regulation of mitochondrial membrane potential (GO:0010917)	1-22	0.0869187	0.399608	0	0	12.5505	30.6581	PRELID1
negative regulation of neural precursor cell proliferation (GO:2000178)	1-22	0.0869187	0.399608	0	0	12.5505	30.6581	PTN
cell migration involved in heart development (GO:0060973)	1-22	0.0869187	0.399608	0	0	12.5505	30.6581	DCHS1
negative regulation of osteoblast proliferation (GO:0033689)	1-22	0.0869187	0.399608	0	0	12.5505	30.6581	ATRAID
cellular response to interleukin-21 (GO:0098757)	1-22	0.0869187	0.399608	0	0	12.5505	30.6581	JAK1
cellular response to UV-B (GO:0071493)	1-22	0.0869187	0.399608	0	0	12.5505	30.6581	CDKN1A
regulation of intrinsic apoptotic signaling pathway by p53 class mediator (GO:1902253)	1-22	0.0869187	0.399608	0	0	12.5505	30.6581	PTTG1IP
commissural neuron axon guidance (GO:0071679)	1-22	0.0869187	0.399608	0	0	12.5505	30.6581	NFIB
regulation of nitrogen compound metabolic process (GO:0051171)	1-22	0.0869187	0.399608	0	0	12.5505	30.6581	ABCA3
folic acid transport (GO:0015884)	1-22	0.0869187	0.399608	0	0	12.5505	30.6581	SLC19A1
regulation of transcription from RNA polymerase II promoter in response to oxidative stress (GO:0043619)	1-22	0.0869187	0.399608	0	0	12.5505	30.6581	HMOX1
positive regulation of epithelial cell proliferation involved in wound healing (GO:0060054)	1-22	0.0869187	0.399608	0	0	12.5505	30.6581	CLDN1
positive regulation of homotypic cell-cell adhesion (GO:0034112)	1-22	0.0869187	0.399608	0	0	12.5505	30.6581	JAK1
positive regulation of isomerase activity (GO:0010912)	1-22	0.0869187	0.399608	0	0	12.5505	30.6581	ITGB2
interleukin-21-mediated signaling pathway (GO:0038114)	1-22	0.0869187	0.399608	0	0	12.5505	30.6581	JAK1
positive regulation of myotube differentiation (GO:0010831)	1-22	0.0869187	0.399608	0	0	12.5505	30.6581	PIEZO1
isoprenoid metabolic process (GO:0006720)	1-22	0.0869187	0.399608	0	0	12.5505	30.6581	HMGCR
positive regulation of oligodendrocyte differentiation (GO:0048714)	1-22	0.0869187	0.399608	0	0	12.5505	30.6581	PTN
spermidine metabolic process (GO:0008216)	1-22	0.0869187	0.399608	0	0	12.5505	30.6581	AMD1
stress-induced premature senescence (GO:0090400)	1-22	0.0869187	0.399608	0	0	12.5505	30.6581	CDKN1A
macromolecule depalmitoylation (GO:0098734)	1-22	0.0869187	0.399608	0	0	12.5505	30.6581	ABHD17B
macromolecule modification (GO:0043412)	1-22	0.0869187	0.399608	0	0	12.5505	30.6581	ST6GAL1
mitophagy (GO:0000423)	1-22	0.0869187	0.399608	0	0	12.5505	30.6581	SQSTM1
protein depalmitoylation (GO:0002084)	1-22	0.0869187	0.399608	0	0	12.5505	30.6581	ABHD17B
negative regulation of amyloid-beta clearance (GO:1900222)	1-22	0.0869187	0.399608	0	0	12.5505	30.6581	HMGCR
positive regulation of receptor-mediated endocytosis (GO:0048260)	2-44	0.0883121	0.399608	0	0	4.19473	10.1801	CD63	DGKD
response to cytokine (GO:0034097)	4-4	0.0905973	0.399608	0	0	2.42231	5.81677	IFITM3	APP	CXCL16	MCL1
chromosome condensation (GO:0030261)	2-45	0.0917566	0.399608	0	0	4.09697	9.78608	TOP2A	H1-4
regulation of pri-miRNA transcription by RNA polymerase II (GO:1902893)	2-45	0.0917566	0.399608	0	0	4.09697	9.78608	JUN	NFIB
cytokine-mediated signaling pathway (GO:0019221)	11-11	0.0951734	0.399608	0	0	1.60735	3.78058	IFITM3	PSMA6	MT2A	CDKN1A	CANX	ITGB2	HMOX1	SQSTM1	CRLF1	JAK1	MCL1
regulation of fibroblast proliferation (GO:0048145)	2-46	0.0952398	0.399608	0	0	4.00365	9.41402	CDKN1A	FTH1
positive regulation of smooth muscle cell proliferation (GO:0048661)	2-46	0.0952398	0.399608	0	0	4.00365	9.41402	JUN	HMOX1
vesicle organization (GO:0016050)	2-46	0.0952398	0.399608	0	0	4.00365	9.41402	SAR1A	SQSTM1
negative regulation of multicellular organismal process (GO:0051241)	5-5	0.095935	0.399608	0	0	2.11793	4.9646	TWSG1	NFIB	SYT11	ID1	HMGCR
translation (GO:0006412)	0	0.095935	0.399608	0	0	2.11793	4.9646	RPS9	RPS5	RPL13A	RPL26	RPL7
purine nucleobase metabolic process (GO:0006144)	1-22	0.0972406	0.399608	0	0	10.9811	25.5922	DPYD
negative regulation of glial cell differentiation (GO:0045686)	1-22	0.0972406	0.399608	0	0	10.9811	25.5922	TMEM98
negative regulation of glycoprotein biosynthetic process (GO:0010561)	1-22	0.0972406	0.399608	0	0	10.9811	25.5922	ITM2B
negative regulation of membrane potential (GO:0045837)	1-22	0.0972406	0.399608	0	0	10.9811	25.5922	PRELID1
negative regulation of protein activation cascade (GO:2000258)	1-22	0.0972406	0.399608	0	0	10.9811	25.5922	F10
negative regulation of protein-containing complex disassembly (GO:0043242)	1-22	0.0972406	0.399608	0	0	10.9811	25.5922	TMEM39A
regulation of ER-associated ubiquitin-dependent protein catabolic process (GO:1903069)	1-22	0.0972406	0.399608	0	0	10.9811	25.5922	BCAP31
negative regulation of retrograde protein transport, ER to cytosol (GO:1904153)	1-22	0.0972406	0.399608	0	0	10.9811	25.5922	UBE2J1
cellular response to interleukin-9 (GO:0071355)	1-22	0.0972406	0.399608	0	0	10.9811	25.5922	JAK1
neuronal ion channel clustering (GO:0045161)	1-22	0.0972406	0.399608	0	0	10.9811	25.5922	AGRN
collagen-activated signaling pathway (GO:0038065)	1-22	0.0972406	0.399608	0	0	10.9811	25.5922	COL4A2
cytolysis by host of symbiont cells (GO:0051838)	1-22	0.0972406	0.399608	0	0	10.9811	25.5922	APOL1
cytolysis in other organism involved in symbiotic interaction (GO:0051801)	1-22	0.0972406	0.399608	0	0	10.9811	25.5922	APOL1
nucleoside diphosphate catabolic process (GO:0009134)	1-22	0.0972406	0.399608	0	0	10.9811	25.5922	ENTPD4
regulation of nephron tubule epithelial cell differentiation (GO:0072182)	1-22	0.0972406	0.399608	0	0	10.9811	25.5922	PROM1
DNA topological change (GO:0006265)	1-22	0.0972406	0.399608	0	0	10.9811	25.5922	TOP2A
peripheral nervous system axon ensheathment (GO:0032292)	1-22	0.0972406	0.399608	0	0	10.9811	25.5922	ADGRG6
endosome to melanosome transport (GO:0035646)	1-22	0.0972406	0.399608	0	0	10.9811	25.5922	CD63
endosome to pigment granule transport (GO:0043485)	1-22	0.0972406	0.399608	0	0	10.9811	25.5922	CD63
positive regulation of blood vessel endothelial cell proliferation involved in sprouting angiogenesis (GO:1903589)	1-22	0.0972406	0.399608	0	0	10.9811	25.5922	HMOX1
glomerular filtration (GO:0003094)	1-22	0.0972406	0.399608	0	0	10.9811	25.5922	MYO1E
glycerolipid biosynthetic process (GO:0045017)	1-22	0.0972406	0.399608	0	0	10.9811	25.5922	FAR1
response to misfolded protein (GO:0051788)	1-22	0.0972406	0.399608	0	0	10.9811	25.5922	DNAJB12
inositol metabolic process (GO:0006020)	1-22	0.0972406	0.399608	0	0	10.9811	25.5922	SLC5A3
positive regulation of mitochondrial calcium ion concentration (GO:0051561)	1-22	0.0972406	0.399608	0	0	10.9811	25.5922	BCAP31
interleukin-9-mediated signaling pathway (GO:0038113)	1-22	0.0972406	0.399608	0	0	10.9811	25.5922	JAK1
Schwann cell development (GO:0014044)	1-22	0.0972406	0.399608	0	0	10.9811	25.5922	ADGRG6
isoprenoid biosynthetic process (GO:0008299)	1-22	0.0972406	0.399608	0	0	10.9811	25.5922	HMGCR
L-ascorbic acid metabolic process (GO:0019852)	1-22	0.0972406	0.399608	0	0	10.9811	25.5922	SLC2A1
T-helper 1 type immune response (GO:0042088)	1-22	0.0972406	0.399608	0	0	10.9811	25.5922	TMEM98
mitral valve morphogenesis (GO:0003183)	1-22	0.0972406	0.399608	0	0	10.9811	25.5922	DCHS1
negative regulation of alpha-beta T cell activation (GO:0046636)	1-22	0.0972406	0.399608	0	0	10.9811	25.5922	TWSG1
regulation of DNA binding (GO:0051101)	2-47	0.0987605	0.399608	0	0	3.91448	9.06226	JUN	CEBPG
polyol metabolic process (GO:0019751)	2-47	0.0987605	0.399608	0	0	3.91448	9.06226	PLCG1	SLC5A3
epidermal growth factor receptor signaling pathway (GO:0007173)	2-47	0.0987605	0.399608	0	0	3.91448	9.06226	DGKD	PLCG1
positive regulation of cell-cell adhesion (GO:0022409)	2-47	0.0987605	0.399608	0	0	3.91448	9.06226	PIEZO1	JAK1
positive regulation of neuron death (GO:1901216)	2-47	0.0987605	0.399608	0	0	3.91448	9.06226	EFNB2	ITGB2
extracellular structure organization (GO:0043062)	5-5	0.0988132	0.399608	0	0	2.09764	4.85504	APP	COL4A2	ITGB2	COL6A1	AGRN
external encapsulating structure organization (GO:0045229)	5-5	0.100269	0.403089	0	0	2.08764	4.80136	APP	COL4A2	ITGB2	COL6A1	AGRN
organic anion transport (GO:0015711)	3-99	0.101896	0.403089	0	0	2.75757	6.29774	SLCO2B1	SLC19A1	CA13
positive regulation of blood vessel endothelial cell migration (GO:0043536)	2-48	0.102317	0.403089	0	0	3.82919	8.72932	HMOX1	PLCG1
substrate adhesion-dependent cell spreading (GO:0034446)	2-48	0.102317	0.403089	0	0	3.82919	8.72932	ATRN	ANTXR1
organelle organization (GO:0006996)	8-8	0.104776	0.403089	0	0	1.72459	3.89055	SEC61A1	GOLGA5	MREG	SAR1A	PEX3	ABCA3	MTFR2	CEP55
aminoglycan biosynthetic process (GO:0006023)	2-49	0.105909	0.403089	0	0	3.74753	8.41386	SDC4	AGRN
secondary alcohol metabolic process (GO:1902652)	2-49	0.105909	0.403089	0	0	3.74753	8.41386	SQLE	APOL2
positive regulation of protein localization to membrane (GO:1905477)	0	0.10656	0.403089	0	0	2.70102	6.0477	ITGB2	SQSTM1	SLC5A3
negative regulation of cellular protein catabolic process (GO:1903363)	1-22	0.107446	0.403089	0	0	9.76049	21.7734	ATRAID
negative regulation of establishment of protein localization (GO:1904950)	1-22	0.107446	0.403089	0	0	9.76049	21.7734	NDFIP1
negative regulation of leukocyte migration (GO:0002686)	1-22	0.107446	0.403089	0	0	9.76049	21.7734	HMOX1
regulation of cell-cell adhesion mediated by integrin (GO:0033632)	1-22	0.107446	0.403089	0	0	9.76049	21.7734	PIEZO1
negative regulation of protein exit from endoplasmic reticulum (GO:0070862)	1-22	0.107446	0.403089	0	0	9.76049	21.7734	UBE2J1
negative regulation of transcription from RNA polymerase II promoter in response to stress (GO:0097201)	1-22	0.107446	0.403089	0	0	9.76049	21.7734	JUN
neuron projection maintenance (GO:1990535)	1-22	0.107446	0.403089	0	0	9.76049	21.7734	APP
neuron projection regeneration (GO:0031102)	1-22	0.107446	0.403089	0	0	9.76049	21.7734	PTN
neuron remodeling (GO:0016322)	1-22	0.107446	0.403089	0	0	9.76049	21.7734	APP
regulation of phospholipid metabolic process (GO:1903725)	1-22	0.107446	0.403089	0	0	9.76049	21.7734	ABCA3
ether lipid biosynthetic process (GO:0008611)	1-22	0.107446	0.403089	0	0	9.76049	21.7734	FAR1
renal filtration (GO:0097205)	1-22	0.107446	0.403089	0	0	9.76049	21.7734	MYO1E
granulocyte migration (GO:0097530)	1-22	0.107446	0.403089	0	0	9.76049	21.7734	ITGB2
ionotropic glutamate receptor signaling pathway (GO:0035235)	1-22	0.107446	0.403089	0	0	9.76049	21.7734	APP
lipid droplet formation (GO:0140042)	1-22	0.107446	0.403089	0	0	9.76049	21.7734	SQLE
lipid phosphorylation (GO:0046834)	1-22	0.107446	0.403089	0	0	9.76049	21.7734	DGKD
long-chain fatty acid import into cell (GO:0044539)	1-22	0.107446	0.403089	0	0	9.76049	21.7734	SLC2A1
positive regulation of T cell apoptotic process (GO:0070234)	1-22	0.107446	0.403089	0	0	9.76049	21.7734	PRELID1
N-acetylneuraminate metabolic process (GO:0006054)	1-22	0.107446	0.403089	0	0	9.76049	21.7734	ST6GAL1
negative regulation of alpha-beta T cell proliferation (GO:0046642)	1-22	0.107446	0.403089	0	0	9.76049	21.7734	TWSG1
ubiquitin-dependent protein catabolic process (GO:0006511)	7-7	0.107637	0.403089	0	0	1.78949	3.98877	PCNP	RNF167	PSMA6	NDFIP1	RNF149	TRIM13	SQSTM1
protein O-linked glycosylation (GO:0006493)	3-3	0.108923	0.404807	0	0	2.6736	5.92767	B3GALNT2	ST6GAL1	TET2
positive regulation of cellular protein metabolic process (GO:0032270)	3-3	0.108923	0.404807	0	0	2.6736	5.92767	RPL26	PTTG1IP	VGLL4
intrinsic apoptotic signaling pathway (GO:0097193)	3-3	0.108923	0.404807	0	0	2.6736	5.92767	CDKN1A	TNFRSF10B	MCL1
regulation of complement activation (GO:0030449)	2-50	0.109534	0.405034	0	0	3.66927	8.11465	C7	PROS1
regulation of epithelial cell migration (GO:0010632)	2-51	0.113192	0.405034	0	0	3.59421	7.83058	PTN	PLCG1
regulation of insulin secretion (GO:0050796)	3-3	0.113709	0.405034	0	0	2.62039	5.69702	ENSA	SLC2A1	TM7SF3
steroid metabolic process (GO:0008202)	3-3	0.113709	0.405034	0	0	2.62039	5.69702	MSMO1	GC	LIPA
positive regulation of cellular metabolic process (GO:0031325)	3-3	0.116132	0.405034	0	0	2.59457	5.58617	CD63	PRELID1	CDKN1A
cartilage development (GO:0051216)	2-52	0.116881	0.405034	0	0	3.52214	7.56062	NFIB	CREB3L2
negative regulation of protein-containing complex assembly (GO:0031333)	2-52	0.116881	0.405034	0	0	3.52214	7.56062	RPL13A	CRYAB
regulation of intrinsic apoptotic signaling pathway (GO:2001242)	2-52	0.116881	0.405034	0	0	3.52214	7.56062	BCAP31	MCL1
purine nucleoside bisphosphate biosynthetic process (GO:0034033)	1-22	0.117537	0.405034	0	0	8.784	18.8065	COASY
pyrimidine nucleoside catabolic process (GO:0046135)	1-22	0.117537	0.405034	0	0	8.784	18.8065	DPYD
regulation of amyloid precursor protein biosynthetic process (GO:0042984)	1-22	0.117537	0.405034	0	0	8.784	18.8065	ITM2B
regulation of cardiac muscle cell differentiation (GO:2000725)	1-22	0.117537	0.405034	0	0	8.784	18.8065	EFNB2
regulation of CD4-positive, alpha-beta T cell proliferation (GO:2000561)	1-22	0.117537	0.405034	0	0	8.784	18.8065	TWSG1
cellular response to interleukin-2 (GO:0071352)	1-22	0.117537	0.405034	0	0	8.784	18.8065	JAK1
coenzyme A biosynthetic process (GO:0015937)	1-22	0.117537	0.405034	0	0	8.784	18.8065	COASY
regulation of long-term neuronal synaptic plasticity (GO:0048169)	1-22	0.117537	0.405034	0	0	8.784	18.8065	APP
regulation of melanin biosynthetic process (GO:0048021)	1-22	0.117537	0.405034	0	0	8.784	18.8065	CTNS
regulation of T cell apoptotic process (GO:0070232)	1-22	0.117537	0.405034	0	0	8.784	18.8065	PRELID1
positive regulation of cellular respiration (GO:1901857)	1-22	0.117537	0.405034	0	0	8.784	18.8065	PRELID1
positive regulation of dendrite development (GO:1900006)	1-22	0.117537	0.405034	0	0	8.784	18.8065	PTN
glucocorticoid biosynthetic process (GO:0006704)	1-22	0.117537	0.405034	0	0	8.784	18.8065	HSD11B2
glucocorticoid metabolic process (GO:0008211)	1-22	0.117537	0.405034	0	0	8.784	18.8065	HSD11B2
positive regulation of integrin activation (GO:0033625)	1-22	0.117537	0.405034	0	0	8.784	18.8065	PIEZO1
ribonucleoside bisphosphate biosynthetic process (GO:0034030)	1-22	0.117537	0.405034	0	0	8.784	18.8065	COASY
interleukin-2-mediated signaling pathway (GO:0038110)	1-22	0.117537	0.405034	0	0	8.784	18.8065	JAK1
signal peptide processing (GO:0006465)	1-22	0.117537	0.405034	0	0	8.784	18.8065	SEC11C
lipoprotein catabolic process (GO:0042159)	1-22	0.117537	0.405034	0	0	8.784	18.8065	ABHD17B
T cell chemotaxis (GO:0010818)	1-22	0.117537	0.405034	0	0	8.784	18.8065	CXCL16
positive regulation of triglyceride biosynthetic process (GO:0010867)	1-22	0.117537	0.405034	0	0	8.784	18.8065	SCARB1
protein kinase C-activating G protein-coupled receptor signaling pathway (GO:0007205)	1-22	0.117537	0.405034	0	0	8.784	18.8065	DGKD
negative regulation of activin receptor signaling pathway (GO:0032926)	1-22	0.117537	0.405034	0	0	8.784	18.8065	NOMO3
protein processing (GO:0016485)	3-3	0.118574	0.40765	0	0	2.56925	5.47819	AEBP1	PRSS12	SEC11C
regulation of immune effector process (GO:0002697)	2-53	0.1206	0.41242	0	0	3.45291	7.30384	C7	PROS1
positive regulation of chemokine production (GO:0032722)	2-53	0.1206	0.41242	0	0	3.45291	7.30384	APP	HMOX1
regulation of humoral immune response (GO:0002920)	2-54	0.124349	0.41242	0	0	3.38633	7.05937	C7	PROS1
glycosaminoglycan metabolic process (GO:0030203)	2-54	0.124349	0.41242	0	0	3.38633	7.05937	SDC4	AGRN
regulation of protein ubiquitination (GO:0031396)	3-3	0.126014	0.41242	0	0	2.49615	5.17044	NDFIP1	PTTG1IP	SQSTM1
cell-cell adhesion via plasma-membrane adhesion molecules (GO:0098742)	4-4	0.127037	0.41242	0	0	2.1283	4.39127	ITGB2	PCDHGC3	DCHS1	CLDN1
pyrimidine nucleobase metabolic process (GO:0006206)	1-22	0.127515	0.41242	0	0	7.98505	16.4454	DPYD
regulation of axon regeneration (GO:0048679)	1-22	0.127515	0.41242	0	0	7.98505	16.4454	PTN
autophagy of peroxisome (GO:0030242)	1-22	0.127515	0.41242	0	0	7.98505	16.4454	SQSTM1
regulation of flagellated sperm motility (GO:1901317)	1-22	0.127515	0.41242	0	0	7.98505	16.4454	SEMG1
regulation of hemopoiesis (GO:1903706)	1-22	0.127515	0.41242	0	0	7.98505	16.4454	PTN
nucleoside catabolic process (GO:0009164)	1-22	0.127515	0.41242	0	0	7.98505	16.4454	DPYD
nucleotide-sugar metabolic process (GO:0009225)	1-22	0.127515	0.41242	0	0	7.98505	16.4454	EXTL2
polyol transport (GO:0015791)	1-22	0.127515	0.41242	0	0	7.98505	16.4454	SLC5A3
positive regulation of cardiocyte differentiation (GO:1905209)	1-22	0.127515	0.41242	0	0	7.98505	16.4454	EFNB2
eye photoreceptor cell differentiation (GO:0001754)	1-22	0.127515	0.41242	0	0	7.98505	16.4454	PROM1
positive regulation of myeloid leukocyte mediated immunity (GO:0002888)	1-22	0.127515	0.41242	0	0	7.98505	16.4454	ITGB2
macrophage chemotaxis (GO:0048246)	1-22	0.127515	0.41242	0	0	7.98505	16.4454	CKLF
melanocyte differentiation (GO:0030318)	1-22	0.127515	0.41242	0	0	7.98505	16.4454	MREG
negative regulation of amyloid fibril formation (GO:1905907)	1-22	0.127515	0.41242	0	0	7.98505	16.4454	CRYAB
positive regulation of I-kappaB kinase/NF-kappaB signaling (GO:0043123)	0	0.129001	0.41242	0	0	2.11544	4.33229	NDFIP1	TRIM13	HMOX1	TNFRSF10B
Fc-epsilon receptor signaling pathway (GO:0038095)	0	0.131065	0.41242	0	0	2.44968	4.9779	PSMA6	JUN	PLCG1
blood vessel morphogenesis (GO:0048514)	2-56	0.131927	0.41242	0	0	3.26058	6.60432	EFNB2	ID1
DNA damage response, signal transduction by p53 class mediator resulting in cell cycle arrest (GO:0006977)	2-56	0.131927	0.41242	0	0	3.26058	6.60432	CDKN1A	RPL26
glycosaminoglycan catabolic process (GO:0006027)	2-56	0.131927	0.41242	0	0	3.26058	6.60432	SDC4	AGRN
protein-containing complex subunit organization (GO:0043933)	3-3	0.133617	0.41242	0	0	2.42708	4.88517	NIFK	SLC2A1	TAPBP
regulation of cytoskeleton organization (GO:0051493)	3-3	0.133617	0.41242	0	0	2.42708	4.88517	RHOBTB3	MAP6	RHOQ
Fc receptor signaling pathway (GO:0038093)	3-3	0.133617	0.41242	0	0	2.42708	4.88517	PSMA6	JUN	PLCG1
nervous system development (GO:0007399)	8-8	0.13521	0.41242	0	0	1.61627	3.23403	MARCKS	ADGRG6	SLC2A1	DCHS1	SERPINI1	PTN	HMGCR	ITM2B
regulation of bone mineralization (GO:0030500)	2-57	0.135756	0.41242	0	0	3.20114	6.39235	PTN	ATRAID
ribosomal large subunit biogenesis (GO:0042273)	2-57	0.135756	0.41242	0	0	3.20114	6.39235	RPL26	RPL7
negative regulation of autophagosome assembly (GO:1902902)	1-22	0.13738	0.41242	0	0	7.31926	14.5288	TMEM39A
negative regulation of CD4-positive, alpha-beta T cell activation (GO:2000515)	1-22	0.13738	0.41242	0	0	7.31926	14.5288	TWSG1
purine ribonucleoside triphosphate metabolic process (GO:0009205)	1-22	0.13738	0.41242	0	0	7.31926	14.5288	RHOQ
purine-containing compound catabolic process (GO:0072523)	1-22	0.13738	0.41242	0	0	7.31926	14.5288	DPYD
negative regulation of chromatin organization (GO:1905268)	1-22	0.13738	0.41242	0	0	7.31926	14.5288	H1-4
negative regulation of chromatin silencing (GO:0031936)	1-22	0.13738	0.41242	0	0	7.31926	14.5288	H1-4
regulation of autophagosome maturation (GO:1901096)	1-22	0.13738	0.41242	0	0	7.31926	14.5288	TMEM39A
negative regulation of gene silencing (GO:0060969)	1-22	0.13738	0.41242	0	0	7.31926	14.5288	H1-4
negative regulation of hippo signaling (GO:0035331)	1-22	0.13738	0.41242	0	0	7.31926	14.5288	VGLL4
cellular biogenic amine metabolic process (GO:0006576)	1-22	0.13738	0.41242	0	0	7.31926	14.5288	AMD1
cellular component maintenance (GO:0043954)	1-22	0.13738	0.41242	0	0	7.31926	14.5288	CLDN1
cellular response to interleukin-15 (GO:0071350)	1-22	0.13738	0.41242	0	0	7.31926	14.5288	JAK1
regulation of homotypic cell-cell adhesion (GO:0034110)	1-22	0.13738	0.41242	0	0	7.31926	14.5288	JAK1
negative regulation of viral release from host cell (GO:1902187)	1-22	0.13738	0.41242	0	0	7.31926	14.5288	TRIM13
central nervous system projection neuron axonogenesis (GO:0021952)	1-22	0.13738	0.41242	0	0	7.31926	14.5288	NFIB
regulation of leukocyte adhesion to vascular endothelial cell (GO:1904994)	1-22	0.13738	0.41242	0	0	7.31926	14.5288	ITGB2
plasma membrane repair (GO:0001778)	1-22	0.13738	0.41242	0	0	7.31926	14.5288	SYT11
regulation of protein exit from endoplasmic reticulum (GO:0070861)	1-22	0.13738	0.41242	0	0	7.31926	14.5288	SAR1A
polyamine metabolic process (GO:0006595)	1-22	0.13738	0.41242	0	0	7.31926	14.5288	AMD1
fatty acid elongation (GO:0030497)	1-22	0.13738	0.41242	0	0	7.31926	14.5288	TECR
regulation of T cell differentiation in thymus (GO:0033081)	1-22	0.13738	0.41242	0	0	7.31926	14.5288	CLPTM1
glucose import (GO:0046323)	1-22	0.13738	0.41242	0	0	7.31926	14.5288	SLC2A1
positive regulation of ERAD pathway (GO:1904294)	1-22	0.13738	0.41242	0	0	7.31926	14.5288	BCAP31
response to UV-B (GO:0010224)	1-22	0.13738	0.41242	0	0	7.31926	14.5288	CDKN1A
interleukin-15-mediated signaling pathway (GO:0035723)	1-22	0.13738	0.41242	0	0	7.31926	14.5288	JAK1
positive regulation of reactive oxygen species biosynthetic process (GO:1903428)	1-22	0.13738	0.41242	0	0	7.31926	14.5288	SLC5A3
transport along microtubule (GO:0010970)	1-22	0.13738	0.41242	0	0	7.31926	14.5288	APP
positive regulation of vascular endothelial cell proliferation (GO:1905564)	1-22	0.13738	0.41242	0	0	7.31926	14.5288	PLCG1
very long-chain fatty acid biosynthetic process (GO:0042761)	1-22	0.13738	0.41242	0	0	7.31926	14.5288	TECR
myelination in peripheral nervous system (GO:0022011)	1-22	0.13738	0.41242	0	0	7.31926	14.5288	ADGRG6
negative regulation by host of viral transcription (GO:0043922)	1-22	0.13738	0.41242	0	0	7.31926	14.5288	JUN
cellular response to transforming growth factor beta stimulus (GO:0071560)	3-3	0.138772	0.41369	0	0	2.38311	4.70644	TWSG1	JUN	ID1
regulation of phagocytosis (GO:0050764)	2-58	0.139609	0.41369	0	0	3.14381	6.1899	SCARB1	SYT11
response to reactive oxygen species (GO:0000302)	2-59	0.143485	0.41369	0	0	3.0885	5.9964	JUN	HMOX1
regulation of protein-containing complex assembly (GO:0043254)	3-3	0.143995	0.41369	0	0	2.34069	4.53621	NCLN	SAR1A	CRYAB
positive regulation of angiogenesis (GO:0045766)	3-3	0.143995	0.41369	0	0	2.34069	4.53621	HMOX1	PLCG1	JAK1
ion transport (GO:0006811)	3-3	0.143995	0.41369	0	0	2.34069	4.53621	SLC9A8	PIEZO1	CTNS
positive regulation of cell projection organization (GO:0031346)	3-3	0.14663	0.41369	0	0	2.32004	4.45411	MAP6	SERPINI1	PTN
positive regulation of DNA-binding transcription factor activity (GO:0051091)	5-5	0.146935	0.41369	0	0	1.83371	3.51662	APP	PSMA6	CRTC3	CEBPG	TRIM13
protein modification by small protein conjugation or removal (GO:0070647)	1-22	0.147133	0.41369	0	0	6.7559	12.9471	DESI2
antigen processing and presentation of endogenous peptide antigen (GO:0002483)	1-22	0.147133	0.41369	0	0	6.7559	12.9471	TAP1
negative regulation of DNA damage response, signal transduction by p53 class mediator (GO:0043518)	1-22	0.147133	0.41369	0	0	6.7559	12.9471	PTTG1IP
negative regulation of neuroinflammatory response (GO:0150079)	1-22	0.147133	0.41369	0	0	6.7559	12.9471	SYT11
cell junction maintenance (GO:0034331)	1-22	0.147133	0.41369	0	0	6.7559	12.9471	CLDN1
negative regulation of pri-miRNA transcription by RNA polymerase II (GO:1902894)	1-22	0.147133	0.41369	0	0	6.7559	12.9471	NFIB
cellular response to low-density lipoprotein particle stimulus (GO:0071404)	1-22	0.147133	0.41369	0	0	6.7559	12.9471	ITGB2
negative regulation of translational initiation (GO:0045947)	1-22	0.147133	0.41369	0	0	6.7559	12.9471	EIF2AK1
regulation of integrin-mediated signaling pathway (GO:2001044)	1-22	0.147133	0.41369	0	0	6.7559	12.9471	CD63
regulation of intrinsic apoptotic signaling pathway in response to DNA damage by p53 class mediator (GO:1902165)	1-22	0.147133	0.41369	0	0	6.7559	12.9471	RPL26
coenzyme A metabolic process (GO:0015936)	1-22	0.147133	0.41369	0	0	6.7559	12.9471	COASY
COPII-coated vesicle cargo loading (GO:0090110)	1-22	0.147133	0.41369	0	0	6.7559	12.9471	SAR1A
nucleoside phosphate catabolic process (GO:1901292)	1-22	0.147133	0.41369	0	0	6.7559	12.9471	ENTPD4
regulation of protein kinase C signaling (GO:0090036)	1-22	0.147133	0.41369	0	0	6.7559	12.9471	DGKD
regulation of response to interferon-gamma (GO:0060330)	1-22	0.147133	0.41369	0	0	6.7559	12.9471	JAK1
ether lipid metabolic process (GO:0046485)	1-22	0.147133	0.41369	0	0	6.7559	12.9471	FAR1
histone H3-K4 trimethylation (GO:0080182)	1-22	0.147133	0.41369	0	0	6.7559	12.9471	TET2
response to X-ray (GO:0010165)	1-22	0.147133	0.41369	0	0	6.7559	12.9471	IKBIP
positive regulation of leukocyte degranulation (GO:0043302)	1-22	0.147133	0.41369	0	0	6.7559	12.9471	ITGB2
positive regulation of lymphocyte migration (GO:2000403)	1-22	0.147133	0.41369	0	0	6.7559	12.9471	APP
sodium-independent organic anion transport (GO:0043252)	1-22	0.147133	0.41369	0	0	6.7559	12.9471	SLCO2B1
T-helper cell differentiation (GO:0042093)	1-22	0.147133	0.41369	0	0	6.7559	12.9471	TMEM98
positive regulation of superoxide anion generation (GO:0032930)	1-22	0.147133	0.41369	0	0	6.7559	12.9471	ITGB2
ncRNA transcription (GO:0098781)	1-22	0.147133	0.41369	0	0	6.7559	12.9471	NIFK
response to organic cyclic compound (GO:0014070)	2-60	0.147384	0.41369	0	0	3.0351	5.81134	PAQR8	PAQR7
ribonucleoprotein complex biogenesis (GO:0022613)	2-60	0.147384	0.41369	0	0	3.0351	5.81134	RPL26	RPL7
regulation of protein binding (GO:0043393)	3-3	0.149281	0.418215	0	0	2.29975	4.37394	APP	CDKN1A	TMBIM6
positive regulation of cysteine-type endopeptidase activity involved in apoptotic process (GO:0043280)	3-3	0.151948	0.418454	0	0	2.27981	4.29565	BCAP31	TNFRSF10B	TNFRSF10A
acute-phase response (GO:0006953)	1-22	0.156778	0.418454	0	0	6.27302	11.6234	APOL2
pyrimidine nucleoside metabolic process (GO:0006213)	1-22	0.156778	0.418454	0	0	6.27302	11.6234	DPYD
negative regulation of endoplasmic reticulum stress-induced intrinsic apoptotic signaling pathway (GO:1902236)	1-22	0.156778	0.418454	0	0	6.27302	11.6234	TMBIM6
regulation of clathrin-dependent endocytosis (GO:2000369)	1-22	0.156778	0.418454	0	0	6.27302	11.6234	DGKD
regulation of extracellular matrix organization (GO:1903053)	1-22	0.156778	0.418454	0	0	6.27302	11.6234	AEBP1
regulation of integrin activation (GO:0033623)	1-22	0.156778	0.418454	0	0	6.27302	11.6234	PIEZO1
clathrin coat assembly (GO:0048268)	1-22	0.156778	0.418454	0	0	6.27302	11.6234	NSG2
nucleobase-containing small molecule catabolic process (GO:0034656)	1-22	0.156778	0.418454	0	0	6.27302	11.6234	ENTPD4
regulation of microglial cell activation (GO:1903978)	1-22	0.156778	0.418454	0	0	6.27302	11.6234	SYT11
nucleosome positioning (GO:0016584)	1-22	0.156778	0.418454	0	0	6.27302	11.6234	H1-4
regulation of phospholipase C activity (GO:1900274)	1-22	0.156778	0.418454	0	0	6.27302	11.6234	PLCG1
electron transport chain (GO:0022900)	1-22	0.156778	0.418454	0	0	6.27302	11.6234	POR
endoplasmic reticulum to cytosol transport (GO:1903513)	1-22	0.156778	0.418454	0	0	6.27302	11.6234	SEC61B
regulation of superoxide anion generation (GO:0032928)	1-22	0.156778	0.418454	0	0	6.27302	11.6234	ITGB2
positive regulation of DNA damage response, signal transduction by p53 class mediator (GO:0043517)	1-22	0.156778	0.418454	0	0	6.27302	11.6234	RPL26
regulation of triglyceride biosynthetic process (GO:0010866)	1-22	0.156778	0.418454	0	0	6.27302	11.6234	SCARB1
glucosamine-containing compound metabolic process (GO:1901071)	1-22	0.156778	0.418454	0	0	6.27302	11.6234	EXTL2
positive regulation of exosomal secretion (GO:1903543)	1-22	0.156778	0.418454	0	0	6.27302	11.6234	SDC4
GTP metabolic process (GO:0046039)	1-22	0.156778	0.418454	0	0	6.27302	11.6234	RHOQ
integrated stress response signaling (GO:0140467)	1-22	0.156778	0.418454	0	0	6.27302	11.6234	EIF2AK1
steroid hormone mediated signaling pathway (GO:0043401)	1-22	0.156778	0.418454	0	0	6.27302	11.6234	ABHD2
macrophage migration (GO:1905517)	1-22	0.156778	0.418454	0	0	6.27302	11.6234	CKLF
positive regulation of sprouting angiogenesis (GO:1903672)	1-22	0.156778	0.418454	0	0	6.27302	11.6234	JAK1
vitamin D metabolic process (GO:0042359)	1-22	0.156778	0.418454	0	0	6.27302	11.6234	GC
protein localization to cell-cell junction (GO:0150105)	1-22	0.156778	0.418454	0	0	6.27302	11.6234	JAK1
cellular response to interferon-gamma (GO:0071346)	3-3	0.157326	0.419155	0	0	2.24094	4.14447	MT2A	RPL13A	JAK1
endoplasmic reticulum to Golgi vesicle-mediated transport (GO:0006888)	4-4	0.157777	0.419596	0	0	1.95043	3.6016	BCAP31	SAR1A	F10	PROS1
negative regulation of gene expression (GO:0010629)	6-6	0.158585	0.420351	0	0	1.67934	3.09246	APP	TWSG1	NDFIP1	SYT11	RPL13A	TMBIM6
negative regulation of endopeptidase activity (GO:0010951)	2-63	0.159207	0.420351	0	0	2.88539	5.30206	SERPINI1	SERPINB7
negative regulation of peptidase activity (GO:0010466)	2-63	0.159207	0.420351	0	0	2.88539	5.30206	SERPINI1	SERPINB7
monocarboxylic acid biosynthetic process (GO:0072330)	2-63	0.159207	0.420351	0	0	2.88539	5.30206	HSD3B7	ACSM6
regulation of extrinsic apoptotic signaling pathway (GO:2001236)	2-64	0.163186	0.421276	0	0	2.83871	5.1462	TNFRSF10B	TNFRSF10A
diterpenoid metabolic process (GO:0016101)	2-64	0.163186	0.421276	0	0	2.83871	5.1462	SDC4	AGRN
regulation of transcription initiation from RNA polymerase II promoter (GO:0060260)	2-64	0.163186	0.421276	0	0	2.83871	5.1462	CDKN1A	MED26
non-canonical Wnt signaling pathway (GO:0035567)	3-3	0.165502	0.421276	0	0	2.18504	3.93039	VANGL1	PSMA6	DAAM1
negative regulation of anoikis (GO:2000811)	1-22	0.166313	0.421276	0	0	5.85452	10.5023	MCL1
regulation of amyloid-beta clearance (GO:1900221)	1-22	0.166313	0.421276	0	0	5.85452	10.5023	HMGCR
regulation of blood vessel endothelial cell proliferation involved in sprouting angiogenesis (GO:1903587)	1-22	0.166313	0.421276	0	0	5.85452	10.5023	HMOX1
negative regulation of macrophage activation (GO:0043031)	1-22	0.166313	0.421276	0	0	5.85452	10.5023	SYT11
regulation of ceramide biosynthetic process (GO:2000303)	1-22	0.166313	0.421276	0	0	5.85452	10.5023	ORMDL2
regulation of cholesterol storage (GO:0010885)	1-22	0.166313	0.421276	0	0	5.85452	10.5023	SCARB1
regulation of chromatin silencing (GO:0031935)	1-22	0.166313	0.421276	0	0	5.85452	10.5023	H1-4
negative regulation of release of cytochrome c from mitochondria (GO:0090201)	1-22	0.166313	0.421276	0	0	5.85452	10.5023	PRELID1
neuron projection organization (GO:0106027)	1-22	0.166313	0.421276	0	0	5.85452	10.5023	APP
nucleoside diphosphate metabolic process (GO:0009132)	1-22	0.166313	0.421276	0	0	5.85452	10.5023	ENTPD4
oogenesis (GO:0048477)	1-22	0.166313	0.421276	0	0	5.85452	10.5023	PTN
regulation of neurotransmitter transport (GO:0051588)	1-22	0.166313	0.421276	0	0	5.85452	10.5023	CPLX1
positive regulation by host of viral transcription (GO:0043923)	1-22	0.166313	0.421276	0	0	5.85452	10.5023	JUN
positive regulation of endothelial cell apoptotic process (GO:2000353)	1-22	0.166313	0.421276	0	0	5.85452	10.5023	PLCG1
resolution of meiotic recombination intermediates (GO:0000712)	1-22	0.166313	0.421276	0	0	5.85452	10.5023	TOP2A
positive regulation of leukocyte adhesion to vascular endothelial cell (GO:1904996)	1-22	0.166313	0.421276	0	0	5.85452	10.5023	ITGB2
killing by host of symbiont cells (GO:0051873)	1-22	0.166313	0.421276	0	0	5.85452	10.5023	APOL1
N-acetylglucosamine metabolic process (GO:0006044)	1-22	0.166313	0.421276	0	0	5.85452	10.5023	EXTL2
protein localization to endoplasmic reticulum (GO:0070972)	1-22	0.166313	0.421276	0	0	5.85452	10.5023	BCAP31
cellular response to type I interferon (GO:0071357)	2-65	0.167183	0.421276	0	0	2.79351	4.99665	IFITM3	JAK1
type I interferon signaling pathway (GO:0060337)	2-65	0.167183	0.421276	0	0	2.79351	4.99665	IFITM3	JAK1
mitotic G1 DNA damage checkpoint signaling (GO:0031571)	2-65	0.167183	0.421276	0	0	2.79351	4.99665	CDKN1A	RPL26
protein targeting (GO:0006605)	0	0.168255	0.421276	0	0	2.16702	3.86223	BCAP31	SEC61A1	SRPRB
platelet degranulation (GO:0002576)	0	0.168255	0.421276	0	0	2.16702	3.86223	APP	CD63	PROS1
regulation of protein secretion (GO:0050708)	0	0.168255	0.421276	0	0	2.16702	3.86223	ENSA	SLC2A1	HMGCR
negative regulation of growth (GO:0045926)	0	0.171022	0.421276	0	0	2.14929	3.79558	MT2A	CDKN1A	VGLL4
ERBB signaling pathway (GO:0038127)	2-66	0.171197	0.421276	0	0	2.74972	4.85309	DGKD	PLCG1
cellular component assembly (GO:0022607)	0	0.17414	0.421276	0	0	1.72494	3.01501	NIFK	ABCA3	SLC2A1	RHOQ	TAPBP
regulation of viral genome replication (GO:0045069)	2-67	0.175227	0.421276	0	0	2.70728	4.71519	IFITM3	TMEM39A
purine ribonucleotide transport (GO:0015868)	1-22	0.175741	0.421276	0	0	5.48833	9.5428	SLC19A1
negative regulation of intrinsic apoptotic signaling pathway by p53 class mediator (GO:1902254)	1-22	0.175741	0.421276	0	0	5.48833	9.5428	PTTG1IP
regulation of cellular respiration (GO:0043457)	1-22	0.175741	0.421276	0	0	5.48833	9.5428	PRELID1
regulation of cellular response to growth factor stimulus (GO:0090287)	1-22	0.175741	0.421276	0	0	5.48833	9.5428	TWSG1
negative regulation of phagocytosis (GO:0050765)	1-22	0.175741	0.421276	0	0	5.48833	9.5428	SYT11
negative regulation of vascular associated smooth muscle cell proliferation (GO:1904706)	1-22	0.175741	0.421276	0	0	5.48833	9.5428	CDKN1A
negative regulation of viral entry into host cell (GO:0046597)	1-22	0.175741	0.421276	0	0	5.48833	9.5428	IFITM3
regulation of leukocyte migration (GO:0002685)	1-22	0.175741	0.421276	0	0	5.48833	9.5428	HMOX1
regulation of neuroblast proliferation (GO:1902692)	1-22	0.175741	0.421276	0	0	5.48833	9.5428	PTN
regulation of osteoblast proliferation (GO:0033688)	1-22	0.175741	0.421276	0	0	5.48833	9.5428	ATRAID
gliogenesis (GO:0042063)	1-22	0.175741	0.421276	0	0	5.48833	9.5428	NFIB
retrograde protein transport, ER to cytosol (GO:0030970)	1-22	0.175741	0.421276	0	0	5.48833	9.5428	SEC61B
reverse cholesterol transport (GO:0043691)	1-22	0.175741	0.421276	0	0	5.48833	9.5428	SCARB1
ribosomal small subunit assembly (GO:0000028)	1-22	0.175741	0.421276	0	0	5.48833	9.5428	RPS5
positive regulation of stem cell differentiation (GO:2000738)	1-22	0.175741	0.421276	0	0	5.48833	9.5428	PTN
midbody abscission (GO:0061952)	1-22	0.175741	0.421276	0	0	5.48833	9.5428	CEP55
monosaccharide transmembrane transport (GO:0015749)	1-22	0.175741	0.421276	0	0	5.48833	9.5428	SLC5A3
regulation of programmed cell death (GO:0043067)	0	0.177422	0.421276	0	0	1.85718	3.21148	PRELID1	TNFRSF10B	TNFRSF10A	TM7SF3
interferon-gamma-mediated signaling pathway (GO:0060333)	2-68	0.179272	0.421276	0	0	2.66613	4.58267	MT2A	JAK1
cellular response to cytokine stimulus (GO:0071345)	0	0.180552	0.421276	0	0	1.49421	2.5577	MT2A	CDKN1A	ITGB2	HMOX1	RPL13A	CRLF1	JAK1	MCL1
regulation of primary metabolic process (GO:0080090)	0	0.182215	0.421276	0	0	2.08118	3.54334	SQLE	PSMA6	HMGCR
protein glycosylation (GO:0006486)	0	0.182215	0.421276	0	0	2.08118	3.54334	B3GALNT2	MGAT4A	TET2
negative regulation of cellular catabolic process (GO:0031330)	2-69	0.183331	0.421276	0	0	2.6262	4.45524	ATRAID	MCL1
cellular response to metal ion (GO:0071248)	0	0.185044	0.421276	0	0	2.06481	3.48367	MT2A	JUN	SYT11
adenine nucleotide transport (GO:0051503)	1-22	0.185063	0.421276	0	0	5.16523	8.71404	SLC19A1
negative regulation of fibroblast proliferation (GO:0048147)	1-22	0.185063	0.421276	0	0	5.16523	8.71404	FTH1
carbohydrate derivative transport (GO:1901264)	1-22	0.185063	0.421276	0	0	5.16523	8.71404	SCARB1
cell migration involved in sprouting angiogenesis (GO:0002042)	1-22	0.185063	0.421276	0	0	5.16523	8.71404	EFNB2
negative regulation of signal transduction by p53 class mediator (GO:1901797)	1-22	0.185063	0.421276	0	0	5.16523	8.71404	PTTG1IP
cellular response to zinc ion (GO:0071294)	1-22	0.185063	0.421276	0	0	5.16523	8.71404	MT2A
neuron maturation (GO:0042551)	1-22	0.185063	0.421276	0	0	5.16523	8.71404	APP
regulation of multicellular organism growth (GO:0040014)	1-22	0.185063	0.421276	0	0	5.16523	8.71404	APP
DNA conformation change (GO:0071103)	1-22	0.185063	0.421276	0	0	5.16523	8.71404	TOP2A
regulation of presynapse assembly (GO:1905606)	1-22	0.185063	0.421276	0	0	5.16523	8.71404	APP
regulation of presynapse organization (GO:0099174)	1-22	0.185063	0.421276	0	0	5.16523	8.71404	APP
pigment granule transport (GO:0051904)	1-22	0.185063	0.421276	0	0	5.16523	8.71404	MREG
endothelial cell proliferation (GO:0001935)	1-22	0.185063	0.421276	0	0	5.16523	8.71404	HMOX1
establishment of vesicle localization (GO:0051650)	1-22	0.185063	0.421276	0	0	5.16523	8.71404	SYT11
regulation of single stranded viral RNA replication via double stranded DNA intermediate (GO:0045091)	1-22	0.185063	0.421276	0	0	5.16523	8.71404	TOP2A
positive regulation of cell adhesion mediated by integrin (GO:0033630)	1-22	0.185063	0.421276	0	0	5.16523	8.71404	PIEZO1
positive regulation of cell migration involved in sprouting angiogenesis (GO:0090050)	1-22	0.185063	0.421276	0	0	5.16523	8.71404	HMOX1
G protein-coupled acetylcholine receptor signaling pathway (GO:0007213)	1-22	0.185063	0.421276	0	0	5.16523	8.71404	AGRN
positive regulation of CREB transcription factor activity (GO:0032793)	1-22	0.185063	0.421276	0	0	5.16523	8.71404	CRTC3
regulation of vascular endothelial cell proliferation (GO:1905562)	1-22	0.185063	0.421276	0	0	5.16523	8.71404	PLCG1
positive regulation of glial cell differentiation (GO:0045687)	1-22	0.185063	0.421276	0	0	5.16523	8.71404	PTN
response to interferon-alpha (GO:0035455)	1-22	0.185063	0.421276	0	0	5.16523	8.71404	IFITM3
high-density lipoprotein particle remodeling (GO:0034375)	1-22	0.185063	0.421276	0	0	5.16523	8.71404	SCARB1
rRNA transcription (GO:0009303)	1-22	0.185063	0.421276	0	0	5.16523	8.71404	NIFK
interleukin-6-mediated signaling pathway (GO:0070102)	1-22	0.185063	0.421276	0	0	5.16523	8.71404	JAK1
positive regulation of nitric-oxide synthase activity (GO:0051000)	1-22	0.185063	0.421276	0	0	5.16523	8.71404	SCARB1
long-chain fatty-acyl-CoA biosynthetic process (GO:0035338)	1-22	0.185063	0.421276	0	0	5.16523	8.71404	TECR
T cell migration (GO:0072678)	1-22	0.185063	0.421276	0	0	5.16523	8.71404	CXCL16
melanosome transport (GO:0032402)	1-22	0.185063	0.421276	0	0	5.16523	8.71404	MREG
mitochondrial fission (GO:0000266)	1-22	0.185063	0.421276	0	0	5.16523	8.71404	MTFR2
protein-containing complex assembly (GO:0065003)	0	0.185532	0.421276	0	0	1.68492	2.83829	NIFK	DNAJB12	SLC2A1	CLDN1	TAPBP
negative regulation of viral process (GO:0048525)	2-70	0.187404	0.421276	0	0	2.58745	4.33265	IFITM3	TRIM13
neutrophil chemotaxis (GO:0030593)	2-70	0.187404	0.421276	0	0	2.58745	4.33265	ITGB2	CKLF
fatty acid catabolic process (GO:0009062)	2-70	0.187404	0.421276	0	0	2.58745	4.33265	ABHD3	ABHD2
central nervous system development (GO:0007417)	0	0.187457	0.421276	0	0	1.67842	2.81003	MARCKS	NFIB	SLC2A1	CTNS	SERPINI1
transmembrane receptor protein serine/threonine kinase signaling pathway (GO:0007178)	0	0.190736	0.421276	0	0	2.03284	3.36814	TWSG1	JUN	ID1
positive regulation of cellular protein localization (GO:1903829)	2-71	0.191489	0.421276	0	0	2.54982	4.21465	SYT11	SLC5A3
negative regulation of cellular process (GO:0048523)	0	0.192423	0.421276	0	0	1.43091	2.35823	APP	RNF167	CDKN1A	TMEM98	SYT11	FTH1	TMBIM6	CRYAB	VGLL4
modification-dependent protein catabolic process (GO:0019941)	0	0.193245	0.421276	0	0	1.79055	2.9433	RNF167	NDFIP1	RNF149	SQSTM1
negative regulation of immune system process (GO:0002683)	1-22	0.19428	0.421276	0	0	4.87802	7.99241	HMOX1
cellular response to copper ion (GO:0071280)	1-22	0.19428	0.421276	0	0	4.87802	7.99241	MT2A
regulation of exosomal secretion (GO:1903541)	1-22	0.19428	0.421276	0	0	4.87802	7.99241	SDC4
negative regulation of RNA metabolic process (GO:0051253)	1-22	0.19428	0.421276	0	0	4.87802	7.99241	TMBIM6
negative regulation of RNA splicing (GO:0033119)	1-22	0.19428	0.421276	0	0	4.87802	7.99241	TMBIM6
cellular response to interleukin-7 (GO:0098761)	1-22	0.19428	0.421276	0	0	4.87802	7.99241	JAK1
regulation of glucose transmembrane transport (GO:0010827)	1-22	0.19428	0.421276	0	0	4.87802	7.99241	SLC2A1
regulation of leukocyte chemotaxis (GO:0002688)	1-22	0.19428	0.421276	0	0	4.87802	7.99241	PTN
detection of mechanical stimulus (GO:0050982)	1-22	0.19428	0.421276	0	0	4.87802	7.99241	PIEZO1
regulation of nervous system process (GO:0031644)	1-22	0.19428	0.421276	0	0	4.87802	7.99241	APP
endoplasmic reticulum mannose trimming (GO:1904380)	1-22	0.19428	0.421276	0	0	4.87802	7.99241	TRIM13
establishment of melanosome localization (GO:0032401)	1-22	0.19428	0.421276	0	0	4.87802	7.99241	MREG
establishment of skin barrier (GO:0061436)	1-22	0.19428	0.421276	0	0	4.87802	7.99241	CLDN1
regulation of stem cell population maintenance (GO:2000036)	1-22	0.19428	0.421276	0	0	4.87802	7.99241	PTN
fatty acid transmembrane transport (GO:1902001)	1-22	0.19428	0.421276	0	0	4.87802	7.99241	SLC2A1
folic acid metabolic process (GO:0046655)	1-22	0.19428	0.421276	0	0	4.87802	7.99241	SLC19A1
regulation of vascular endothelial growth factor signaling pathway (GO:1900746)	1-22	0.19428	0.421276	0	0	4.87802	7.99241	CD63
glycerolipid catabolic process (GO:0046503)	1-22	0.19428	0.421276	0	0	4.87802	7.99241	ABHD2
regulation of water loss via skin (GO:0033561)	1-22	0.19428	0.421276	0	0	4.87802	7.99241	CLDN1
heart trabecula morphogenesis (GO:0061384)	1-22	0.19428	0.421276	0	0	4.87802	7.99241	ADGRG6
interleukin-7-mediated signaling pathway (GO:0038111)	1-22	0.19428	0.421276	0	0	4.87802	7.99241	JAK1
positive regulation of oxidoreductase activity (GO:0051353)	1-22	0.19428	0.421276	0	0	4.87802	7.99241	POR
positive regulation of triglyceride metabolic process (GO:0090208)	1-22	0.19428	0.421276	0	0	4.87802	7.99241	SCARB1
vesicle transport along actin filament (GO:0030050)	1-22	0.19428	0.421276	0	0	4.87802	7.99241	MYO1E
N-glycan processing (GO:0006491)	1-22	0.19428	0.421276	0	0	4.87802	7.99241	MGAT4A
cell morphogenesis involved in differentiation (GO:0000904)	2-72	0.195587	0.423482	0	0	2.51327	4.10103	ATRN	ANTXR1
post-translational protein modification (GO:0043687)	0	0.196771	0.425419	0	0	1.56356	2.5419	APP	PSMA6	GOLM1	MGAT4A	MXRA8	APOL1
regulation of actin filament-based process (GO:0032970)	2-73	0.199695	0.425601	0	0	2.47774	3.99156	RHOBTB3	RHOQ
granulocyte chemotaxis (GO:0071621)	2-73	0.199695	0.425601	0	0	2.47774	3.99156	ITGB2	CKLF
positive regulation of JNK cascade (GO:0046330)	2-73	0.199695	0.425601	0	0	2.47774	3.99156	APP	TRAF4
positive regulation of synaptic transmission (GO:0050806)	2-73	0.199695	0.425601	0	0	2.47774	3.99156	APP	SQSTM1
negative regulation of dephosphorylation (GO:0035305)	1-22	0.203394	0.425601	0	0	4.62105	7.35954	ENSA
calcium-independent cell-cell adhesion via plasma membrane cell-adhesion molecules (GO:0016338)	1-22	0.203394	0.425601	0	0	4.62105	7.35954	CLDN1
cellular response to misfolded protein (GO:0071218)	1-22	0.203394	0.425601	0	0	4.62105	7.35954	DNAJB12
regulation of hippo signaling (GO:0035330)	1-22	0.203394	0.425601	0	0	4.62105	7.35954	VGLL4
negative regulation of viral life cycle (GO:1903901)	1-22	0.203394	0.425601	0	0	4.62105	7.35954	IFITM3
regulation of lymphocyte differentiation (GO:0045619)	1-22	0.203394	0.425601	0	0	4.62105	7.35954	PRELID1
cortical actin cytoskeleton organization (GO:0030866)	1-22	0.203394	0.425601	0	0	4.62105	7.35954	RHOQ
organic cation transport (GO:0015695)	1-22	0.203394	0.425601	0	0	4.62105	7.35954	SLC22A18
folic acid-containing compound metabolic process (GO:0006760)	1-22	0.203394	0.425601	0	0	4.62105	7.35954	SLC19A1
regulation of T cell migration (GO:2000404)	1-22	0.203394	0.425601	0	0	4.62105	7.35954	APP
granulocyte differentiation (GO:0030851)	1-22	0.203394	0.425601	0	0	4.62105	7.35954	CDKN1A
hepaticobiliary system development (GO:0061008)	1-22	0.203394	0.425601	0	0	4.62105	7.35954	CEBPG
positive regulation of nitrogen compound metabolic process (GO:0051173)	1-22	0.203394	0.425601	0	0	4.62105	7.35954	APP
toll-like receptor 4 signaling pathway (GO:0034142)	1-22	0.203394	0.425601	0	0	4.62105	7.35954	ITGB2
mitotic cytokinetic process (GO:1902410)	1-22	0.203394	0.425601	0	0	4.62105	7.35954	CEP55
myeloid cell development (GO:0061515)	1-22	0.203394	0.425601	0	0	4.62105	7.35954	APP
natural killer cell mediated immunity (GO:0002228)	1-22	0.203394	0.425601	0	0	4.62105	7.35954	CEBPG
negative regulation of protein binding (GO:0032091)	2-74	0.203813	0.425601	0	0	2.4432	3.88605	CDKN1A	TMBIM6
DNA damage response, signal transduction by p53 class mediator (GO:0030330)	2-74	0.203813	0.425601	0	0	2.4432	3.88605	CDKN1A	RPL26
regulation of peptide hormone secretion (GO:0090276)	2-74	0.203813	0.425601	0	0	2.4432	3.88605	ENSA	SLC2A1
integrin-mediated signaling pathway (GO:0007229)	2-75	0.207941	0.42831	0	0	2.40961	3.7843	ITGB2	PTN
cell morphogenesis involved in neuron differentiation (GO:0048667)	2-76	0.212077	0.42831	0	0	2.37693	3.68616	APP	MAP6
chloride transport (GO:0006821)	2-76	0.212077	0.42831	0	0	2.37693	3.68616	TTYH3	APOL1
regulation of RNA splicing (GO:0043484)	2-76	0.212077	0.42831	0	0	2.37693	3.68616	ESRP2	TMBIM6
acetylcholine receptor signaling pathway (GO:0095500)	1-22	0.212404	0.42831	0	0	4.38978	6.80092	AGRN
actin filament-based transport (GO:0099515)	1-22	0.212404	0.42831	0	0	4.38978	6.80092	MYO1E
aerobic respiration (GO:0009060)	1-22	0.212404	0.42831	0	0	4.38978	6.80092	MTFR2
purinergic nucleotide receptor signaling pathway (GO:0035590)	1-22	0.212404	0.42831	0	0	4.38978	6.80092	APP
regulation of anoikis (GO:2000209)	1-22	0.212404	0.42831	0	0	4.38978	6.80092	MCL1
regulation of cardiac muscle cell proliferation (GO:0060043)	1-22	0.212404	0.42831	0	0	4.38978	6.80092	VGLL4
calcium-mediated signaling using intracellular calcium source (GO:0035584)	1-22	0.212404	0.42831	0	0	4.38978	6.80092	BCAP31
negative regulation of protein localization to cell periphery (GO:1904376)	1-22	0.212404	0.42831	0	0	4.38978	6.80092	RHOQ
negative regulation of protein localization to plasma membrane (GO:1903077)	1-22	0.212404	0.42831	0	0	4.38978	6.80092	RHOQ
negative regulation of reproductive process (GO:2000242)	1-22	0.212404	0.42831	0	0	4.38978	6.80092	SEMG1
cellular response to steroid hormone stimulus (GO:0071383)	1-22	0.212404	0.42831	0	0	4.38978	6.80092	ABHD2
neuron apoptotic process (GO:0051402)	1-22	0.212404	0.42831	0	0	4.38978	6.80092	APP
extrinsic apoptotic signaling pathway in absence of ligand (GO:0097192)	1-22	0.212404	0.42831	0	0	4.38978	6.80092	MCL1
positive regulation of glycolytic process (GO:0045821)	1-22	0.212404	0.42831	0	0	4.38978	6.80092	APP
response to progesterone (GO:0032570)	1-22	0.212404	0.42831	0	0	4.38978	6.80092	ABHD2
hydrogen peroxide catabolic process (GO:0042744)	1-22	0.212404	0.42831	0	0	4.38978	6.80092	HBQ1
positive regulation of lipid storage (GO:0010884)	1-22	0.212404	0.42831	0	0	4.38978	6.80092	SCARB1
positive regulation of purine nucleotide metabolic process (GO:1900544)	1-22	0.212404	0.42831	0	0	4.38978	6.80092	APP
melanosome localization (GO:0032400)	1-22	0.212404	0.42831	0	0	4.38978	6.80092	MREG
positive regulation of vascular associated smooth muscle cell proliferation (GO:1904707)	1-22	0.212404	0.42831	0	0	4.38978	6.80092	JUN
zinc ion transport (GO:0006829)	1-22	0.212404	0.42831	0	0	4.38978	6.80092	SLC30A1
regulation of small GTPase mediated signal transduction (GO:0051056)	0	0.213925	0.430194	0	0	1.91421	2.95197	ARHGAP11A	SQSTM1	RHOQ
positive regulation of cellular catabolic process (GO:0031331)	0	0.213925	0.430194	0	0	1.91421	2.95197	APP	PTTG1IP	VGLL4
gene expression (GO:0010467)	0	0.216156	0.431855	0	0	1.51356	2.3184	RPS9	RPS5	RPL13A	RPL26	MAGOHB	RPL7
cellular response to UV (GO:0034644)	2-77	0.216222	0.431855	0	0	2.34512	3.59143	CDKN1A	RPL26
neutrophil migration (GO:1990266)	2-77	0.216222	0.431855	0	0	2.34512	3.59143	ITGB2	CKLF
positive regulation of endothelial cell proliferation (GO:0001938)	2-77	0.216222	0.431855	0	0	2.34512	3.59143	HMOX1	PLCG1
positive regulation of protein modification by small protein conjugation or removal (GO:1903322)	2-77	0.216222	0.431855	0	0	2.34512	3.59143	NDFIP1	PTTG1IP
negative regulation of cyclin-dependent protein kinase activity (GO:1904030)	1-22	0.221314	0.432032	0	0	4.18053	6.30497	CDKN1A
cell projection assembly (GO:0030031)	1-22	0.221314	0.432032	0	0	4.18053	6.30497	RHOQ
negative regulation of phosphate metabolic process (GO:0045936)	1-22	0.221314	0.432032	0	0	4.18053	6.30497	CDKN1A
negative regulation of protein dephosphorylation (GO:0035308)	1-22	0.221314	0.432032	0	0	4.18053	6.30497	ENSA
regulation of endoplasmic reticulum stress-induced intrinsic apoptotic signaling pathway (GO:1902235)	1-22	0.221314	0.432032	0	0	4.18053	6.30497	TMBIM6
fatty-acyl-CoA metabolic process (GO:0035337)	1-22	0.221314	0.432032	0	0	4.18053	6.30497	FAR1
positive regulation of DNA-templated transcription, initiation (GO:2000144)	1-22	0.221314	0.432032	0	0	4.18053	6.30497	JUN
regulation of viral release from host cell (GO:1902186)	1-22	0.221314	0.432032	0	0	4.18053	6.30497	TRIM13
positive regulation of peptidase activity (GO:0010952)	1-22	0.221314	0.432032	0	0	4.18053	6.30497	PRELID1
lipid droplet organization (GO:0034389)	1-22	0.221314	0.432032	0	0	4.18053	6.30497	SQLE
membrane lipid metabolic process (GO:0006643)	1-22	0.221314	0.432032	0	0	4.18053	6.30497	TECR
mitochondrial calcium ion homeostasis (GO:0051560)	1-22	0.221314	0.432032	0	0	4.18053	6.30497	BCAP31
zinc ion transmembrane transport (GO:0071577)	1-22	0.221314	0.432032	0	0	4.18053	6.30497	SLC30A1
proteasomal ubiquitin-independent protein catabolic process (GO:0010499)	1-22	0.221314	0.432032	0	0	4.18053	6.30497	PSMA6
protein import into peroxisome membrane (GO:0045046)	1-22	0.221314	0.432032	0	0	4.18053	6.30497	PEX3
natural killer cell mediated cytotoxicity (GO:0042267)	1-22	0.221314	0.432032	0	0	4.18053	6.30497	CEBPG
protein localization to cell junction (GO:1902414)	1-22	0.221314	0.432032	0	0	4.18053	6.30497	JAK1
positive regulation of programmed cell death (GO:0043068)	0	0.223267	0.435266	0	0	1.56946	2.35323	TOP2A	JUN	TNFRSF10B	TNFRSF10A	SQSTM1
mRNA 3'-end processing (GO:0031124)	2-79	0.224532	0.437153	0	0	2.28397	3.41166	APP	MAGOHB
negative regulation of cellular component organization (GO:0051129)	2-80	0.228697	0.439869	0	0	2.25458	3.32631	SYT11	CRYAB
regulation of protein localization to plasma membrane (GO:1903076)	2-80	0.228697	0.439869	0	0	2.25458	3.32631	SQSTM1	RHOQ
lipid biosynthetic process (GO:0008610)	2-80	0.228697	0.439869	0	0	2.25458	3.32631	ACSM6	HMGCR
negative regulation of extrinsic apoptotic signaling pathway in absence of ligand (GO:2001240)	1-22	0.230122	0.439869	0	0	3.9903	5.86233	MCL1
negative regulation of signal transduction in absence of ligand (GO:1901099)	1-22	0.230122	0.439869	0	0	3.9903	5.86233	MCL1
regulation of interferon-gamma-mediated signaling pathway (GO:0060334)	1-22	0.230122	0.439869	0	0	3.9903	5.86233	JAK1
cytoskeleton-dependent intracellular transport (GO:0030705)	1-22	0.230122	0.439869	0	0	3.9903	5.86233	MAP6
diacylglycerol metabolic process (GO:0046339)	1-22	0.230122	0.439869	0	0	3.9903	5.86233	DGKD
regulation of supramolecular fiber organization (GO:1902903)	1-22	0.230122	0.439869	0	0	3.9903	5.86233	AEBP1
positive regulation of cholesterol efflux (GO:0010875)	1-22	0.230122	0.439869	0	0	3.9903	5.86233	ABCA3
positive regulation of epithelial cell apoptotic process (GO:1904037)	1-22	0.230122	0.439869	0	0	3.9903	5.86233	PLCG1
response to copper ion (GO:0046688)	1-22	0.230122	0.439869	0	0	3.9903	5.86233	MT2A
positive regulation of receptor internalization (GO:0002092)	1-22	0.230122	0.439869	0	0	3.9903	5.86233	CD63
protein deacylation (GO:0035601)	1-22	0.230122	0.439869	0	0	3.9903	5.86233	ABHD17B
regulation of cell growth (GO:0001558)	0	0.230919	0.440818	0	0	1.6547	2.42527	CDKN1A	EBAG9	VGLL4	CXCL16
activation of cysteine-type endopeptidase activity involved in apoptotic process (GO:0006919)	2-81	0.232866	0.443382	0	0	2.22593	3.24382	TNFRSF10B	TNFRSF10A
negative regulation of protein modification process (GO:0031400)	2-81	0.232866	0.443382	0	0	2.22593	3.24382	ENSA	DBI
cell-cell junction organization (GO:0045216)	2-82	0.237041	0.446631	0	0	2.19799	3.16406	DCHS1	CLDN1
positive regulation of protein ubiquitination (GO:0031398)	2-82	0.237041	0.446631	0	0	2.19799	3.16406	NDFIP1	PTTG1IP
purine ribonucleotide catabolic process (GO:0009154)	1-22	0.238832	0.446631	0	0	3.81662	5.46538	ENTPD4
apoptotic nuclear changes (GO:0030262)	1-22	0.238832	0.446631	0	0	3.81662	5.46538	TOP2A
neuromuscular junction development (GO:0007528)	1-22	0.238832	0.446631	0	0	3.81662	5.46538	AGRN
cholesterol efflux (GO:0033344)	1-22	0.238832	0.446631	0	0	3.81662	5.46538	SCARB1
regulation of monooxygenase activity (GO:0032768)	1-22	0.238832	0.446631	0	0	3.81662	5.46538	POR
DNA packaging (GO:0006323)	1-22	0.238832	0.446631	0	0	3.81662	5.46538	H1-4
positive regulation of carbohydrate metabolic process (GO:0045913)	1-22	0.238832	0.446631	0	0	3.81662	5.46538	APP
positive regulation of neuron apoptotic process (GO:0043525)	1-22	0.238832	0.446631	0	0	3.81662	5.46538	MCL1
positive regulation of phospholipase activity (GO:0010518)	1-22	0.238832	0.446631	0	0	3.81662	5.46538	PLCG1
positive regulation of protein targeting to membrane (GO:0090314)	1-22	0.238832	0.446631	0	0	3.81662	5.46538	ITGB2
protein alpha-1,2-demannosylation (GO:0036508)	1-22	0.238832	0.446631	0	0	3.81662	5.46538	TRIM13
protein exit from endoplasmic reticulum (GO:0032527)	1-22	0.238832	0.446631	0	0	3.81662	5.46538	SEC61B
positive regulation of plasma membrane bounded cell projection assembly (GO:0120034)	2-83	0.241219	0.450521	0	0	2.17075	3.08691	AGRN	RHOQ
actin filament organization (GO:0007015)	0	0.2467	0.454059	0	0	1.7719	2.47993	MYO1E	MARCKS	RHOBTB3
acylglycerol homeostasis (GO:0055090)	1-22	0.247444	0.454059	0	0	3.65741	5.10784	SCARB1
negative regulation of endocytosis (GO:0045806)	1-22	0.247444	0.454059	0	0	3.65741	5.10784	SYT11
negative regulation of ion transport (GO:0043271)	1-22	0.247444	0.454059	0	0	3.65741	5.10784	SYT11
cAMP-mediated signaling (GO:0019933)	1-22	0.247444	0.454059	0	0	3.65741	5.10784	ADGRG6
regulation of dopamine secretion (GO:0014059)	1-22	0.247444	0.454059	0	0	3.65741	5.10784	SYT11
negative regulation of response to endoplasmic reticulum stress (GO:1903573)	1-22	0.247444	0.454059	0	0	3.65741	5.10784	TMBIM6
regulation of myotube differentiation (GO:0010830)	1-22	0.247444	0.454059	0	0	3.65741	5.10784	PIEZO1
peroxisome organization (GO:0007031)	1-22	0.247444	0.454059	0	0	3.65741	5.10784	PEX3
phosphatidylglycerol metabolic process (GO:0046471)	1-22	0.247444	0.454059	0	0	3.65741	5.10784	ABCA3
fat-soluble vitamin metabolic process (GO:0006775)	1-22	0.247444	0.454059	0	0	3.65741	5.10784	GC
positive regulation of ERBB signaling pathway (GO:1901186)	1-22	0.247444	0.454059	0	0	3.65741	5.10784	DGKD
positive regulation of peptidyl-threonine phosphorylation (GO:0010800)	1-22	0.247444	0.454059	0	0	3.65741	5.10784	APP
positive regulation of T cell migration (GO:2000406)	1-22	0.247444	0.454059	0	0	3.65741	5.10784	APP
positive regulation of protein catabolic process (GO:0045732)	2-85	0.249586	0.457418	0	0	2.11822	2.93999	PTTG1IP	VGLL4
extracellular matrix organization (GO:0030198)	0	0.252432	0.45991	0	0	1.4939	2.05653	APP	COL4A2	ITGB2	COL6A1	AGRN
negative regulation of cellular amide metabolic process (GO:0034249)	2-86	0.253772	0.45991	0	0	2.0929	2.87003	ORMDL2	RPL13A
regulation of neuron death (GO:1901214)	2-86	0.253772	0.45991	0	0	2.0929	2.87003	EFNB2	ITGB2
regulation of Ras protein signal transduction (GO:0046578)	2-86	0.253772	0.45991	0	0	2.0929	2.87003	LRRC59	SQSTM1
positive regulation of endothelial cell migration (GO:0010595)	2-86	0.253772	0.45991	0	0	2.0929	2.87003	SCARB1	PLCG1
positive regulation of NF-kappaB transcription factor activity (GO:0051092)	0	0.255776	0.45991	0	0	1.73667	2.36786	APP	PSMA6	TRIM13
negative regulation of macroautophagy (GO:0016242)	1-22	0.255958	0.45991	0	0	3.51093	4.7845	TMEM39A
negative regulation of protein localization to membrane (GO:1905476)	1-22	0.255958	0.45991	0	0	3.51093	4.7845	RHOQ
negative regulation of receptor-mediated endocytosis (GO:0048261)	1-22	0.255958	0.45991	0	0	3.51093	4.7845	APP
clathrin-dependent endocytosis (GO:0072583)	1-22	0.255958	0.45991	0	0	3.51093	4.7845	CANX
organelle fission (GO:0048285)	1-22	0.255958	0.45991	0	0	3.51093	4.7845	MTFR2
regulation of synapse organization (GO:0050807)	1-22	0.255958	0.45991	0	0	3.51093	4.7845	ABHD17B
positive regulation of glucose import (GO:0046326)	1-22	0.255958	0.45991	0	0	3.51093	4.7845	RHOQ
hippo signaling (GO:0035329)	1-22	0.255958	0.45991	0	0	3.51093	4.7845	DCHS1
RNA polyadenylation (GO:0043631)	1-22	0.255958	0.45991	0	0	3.51093	4.7845	APP
mRNA polyadenylation (GO:0006378)	1-22	0.255958	0.45991	0	0	3.51093	4.7845	APP
innate immune response (GO:0045087)	0	0.256677	0.460638	0	0	1.48369	2.01773	IFITM3	APP	TRIM13	APOL1	CXCL16
regulation of transcription from RNA polymerase II promoter in response to stress (GO:0043618)	2-87	0.257961	0.462377	0	0	2.06817	2.80227	PSMA6	HMOX1
negative regulation of cell population proliferation (GO:0008285)	0	0.258615	0.462983	0	0	1.41855	1.91847	APP	CDKN1A	FTH1	HMOX1	ATRAID	VGLL4
positive regulation of neuron projection development (GO:0010976)	2-88	0.26215	0.465354	0	0	2.04402	2.73661	PTN	SERPINI1
metal ion transport (GO:0030001)	2-88	0.26215	0.465354	0	0	2.04402	2.73661	NDFIP1	SLC30A1
negative regulation of programmed cell death (GO:0043069)	0	0.262412	0.465354	0	0	1.41084	1.88747	PRELID1	TMBIM6	TM7SF3	CRYAB	SQSTM1	MCL1
acute inflammatory response (GO:0002526)	1-22	0.264377	0.465354	0	0	3.37573	4.491	APOL2
bile acid biosynthetic process (GO:0006699)	1-22	0.264377	0.465354	0	0	3.37573	4.491	HSD3B7
calcium-ion regulated exocytosis (GO:0017156)	1-22	0.264377	0.465354	0	0	3.37573	4.491	SYT11
regulation of epidermal growth factor-activated receptor activity (GO:0007176)	1-22	0.264377	0.465354	0	0	3.37573	4.491	APP
cellular senescence (GO:0090398)	1-22	0.264377	0.465354	0	0	3.37573	4.491	CDKN1A
peroxisomal membrane transport (GO:0015919)	1-22	0.264377	0.465354	0	0	3.37573	4.491	PEX3
positive regulation of calcium ion transmembrane transport (GO:1904427)	1-22	0.264377	0.465354	0	0	3.37573	4.491	PLCG1
regulation of vasculature development (GO:1901342)	1-22	0.264377	0.465354	0	0	3.37573	4.491	HMOX1
positive regulation of mitotic cell cycle (GO:0045931)	1-22	0.264377	0.465354	0	0	3.37573	4.491	APP
modulation of excitatory postsynaptic potential (GO:0098815)	1-22	0.264377	0.465354	0	0	3.37573	4.491	APP
presynaptic endocytosis (GO:0140238)	1-22	0.264377	0.465354	0	0	3.37573	4.491	CANX
apoptotic process (GO:0006915)	0	0.26524	0.466016	0	0	1.55153	2.05907	APP	ITGB2	TNFRSF10B	TNFRSF10A
regulation of endothelial cell migration (GO:0010594)	2-89	0.26634	0.466016	0	0	2.02042	2.67298	SCARB1	PTN
collagen fibril organization (GO:0030199)	2-89	0.26634	0.466016	0	0	2.02042	2.67298	COL4A2	COL6A1
second-messenger-mediated signaling (GO:0019932)	2-89	0.26634	0.466016	0	0	2.02042	2.67298	DGKD	PLCG1
protein import (GO:0017038)	2-89	0.26634	0.466016	0	0	2.02042	2.67298	PEX3	PTTG1IP
positive regulation of binding (GO:0051099)	2-90	0.27053	0.467668	0	0	1.99736	2.6113	APP	CEBPG
bile acid and bile salt transport (GO:0015721)	1-22	0.2727	0.467668	0	0	3.25053	4.22369	SLCO2B1
regulation of DNA damage response, signal transduction by p53 class mediator (GO:0043516)	1-22	0.2727	0.467668	0	0	3.25053	4.22369	PTTG1IP
cellular response to epidermal growth factor stimulus (GO:0071364)	1-22	0.2727	0.467668	0	0	3.25053	4.22369	PLCG1
regulation of extrinsic apoptotic signaling pathway in absence of ligand (GO:2001239)	1-22	0.2727	0.467668	0	0	3.25053	4.22369	MCL1
cellular response to interleukin-6 (GO:0071354)	1-22	0.2727	0.467668	0	0	3.25053	4.22369	JAK1
neutral amino acid transport (GO:0015804)	1-22	0.2727	0.467668	0	0	3.25053	4.22369	CTNS
regulation of multicellular organismal development (GO:2000026)	1-22	0.2727	0.467668	0	0	3.25053	4.22369	PTN
regulation of postsynapse organization (GO:0099175)	1-22	0.2727	0.467668	0	0	3.25053	4.22369	ABHD17B
regulation of protein transport (GO:0051223)	1-22	0.2727	0.467668	0	0	3.25053	4.22369	NDFIP1
regulation of reactive oxygen species biosynthetic process (GO:1903426)	1-22	0.2727	0.467668	0	0	3.25053	4.22369	SLC5A3
positive regulation of fibroblast proliferation (GO:0048146)	1-22	0.2727	0.467668	0	0	3.25053	4.22369	CDKN1A
response to interferon-beta (GO:0035456)	1-22	0.2727	0.467668	0	0	3.25053	4.22369	IFITM3
response to ketone (GO:1901654)	1-22	0.2727	0.467668	0	0	3.25053	4.22369	ABHD2
L-amino acid transport (GO:0015807)	1-22	0.2727	0.467668	0	0	3.25053	4.22369	CTNS
leukocyte cell-cell adhesion (GO:0007159)	1-22	0.2727	0.467668	0	0	3.25053	4.22369	ITGB2
positive regulation of synapse assembly (GO:0051965)	1-22	0.2727	0.467668	0	0	3.25053	4.22369	AGRN
positive regulation of apoptotic process (GO:0043065)	0	0.273823	0.469046	0	0	1.44418	1.87061	TOP2A	JUN	TNFRSF10B	TNFRSF10A	SQSTM1
regulation of actin cytoskeleton organization (GO:0032956)	2-91	0.274719	0.469485	0	0	1.97482	2.55148	RHOBTB3	RHOQ
regulation of stem cell differentiation (GO:2000736)	2-91	0.274719	0.469485	0	0	1.97482	2.55148	PSMA6	PTN
negative regulation of mitotic cell cycle phase transition (GO:1901991)	2-92	0.278907	0.471321	0	0	1.95278	2.49345	PSMA6	CDKN1A
regulation of lipid metabolic process (GO:0019216)	2-92	0.278907	0.471321	0	0	1.95278	2.49345	SQLE	HMGCR
regulation of peptidyl-tyrosine phosphorylation (GO:0050730)	2-92	0.278907	0.471321	0	0	1.95278	2.49345	APP	ITGB2
retinoid metabolic process (GO:0001523)	2-92	0.278907	0.471321	0	0	1.95278	2.49345	SDC4	AGRN
negative regulation of cellular macromolecule biosynthetic process (GO:2000113)	0	0.278988	0.471321	0	0	1.30959	1.67181	JUN	CDKN1A	EIF2AK1	ID1	RPL13A	DBI	CRYAB	VGLL4
protein targeting to peroxisome (GO:0006625)	1-22	0.28093	0.471321	0	0	3.13429	3.97944	PEX3
aggrephagy (GO:0035973)	1-22	0.28093	0.471321	0	0	3.13429	3.97944	SQSTM1
regulation of DNA biosynthetic process (GO:2000278)	1-22	0.28093	0.471321	0	0	3.13429	3.97944	CDKN1A
dicarboxylic acid transport (GO:0006835)	1-22	0.28093	0.471321	0	0	3.13429	3.97944	SLC19A1
regulation of neuronal synaptic plasticity (GO:0048168)	1-22	0.28093	0.471321	0	0	3.13429	3.97944	APP
regulation of protein targeting to membrane (GO:0090313)	1-22	0.28093	0.471321	0	0	3.13429	3.97944	ITGB2
glycolytic process (GO:0006096)	1-22	0.28093	0.471321	0	0	3.13429	3.97944	LDHA
response to zinc ion (GO:0010043)	1-22	0.28093	0.471321	0	0	3.13429	3.97944	MT2A
positive regulation of leukocyte migration (GO:0002687)	1-22	0.28093	0.471321	0	0	3.13429	3.97944	PTN
hydrogen peroxide metabolic process (GO:0042743)	1-22	0.28093	0.471321	0	0	3.13429	3.97944	HBQ1
intrinsic apoptotic signaling pathway in response to endoplasmic reticulum stress (GO:0070059)	1-22	0.28093	0.471321	0	0	3.13429	3.97944	TNFRSF10B
cellular macromolecule biosynthetic process (GO:0034645)	0	0.282487	0.472552	0	0	1.42519	1.80162	RPS9	RPS5	RPL13A	RPL26	RPL7
regulation of neuron projection development (GO:0010975)	0	0.286327	0.472552	0	0	1.62863	2.0368	EFNB2	SERPINI1	PTN
negative regulation of cellular protein metabolic process (GO:0032269)	2-94	0.287278	0.472552	0	0	1.91013	2.38251	RPL13A	ATRAID
positive regulation of epithelial cell migration (GO:0010634)	2-94	0.287278	0.472552	0	0	1.91013	2.38251	SCARB1	PLCG1
interleukin-1-mediated signaling pathway (GO:0070498)	2-94	0.287278	0.472552	0	0	1.91013	2.38251	PSMA6	SQSTM1
regulation of catecholamine secretion (GO:0050433)	1-22	0.289068	0.472552	0	0	3.02605	3.75562	SYT11
regulation of cation transmembrane transport (GO:1904062)	1-22	0.289068	0.472552	0	0	3.02605	3.75562	CD63
negative regulation of Notch signaling pathway (GO:0045746)	1-22	0.289068	0.472552	0	0	3.02605	3.75562	DLK1
cell projection organization (GO:0030030)	1-22	0.289068	0.472552	0	0	3.02605	3.75562	RHOQ
peptidyl-lysine trimethylation (GO:0018023)	1-22	0.289068	0.472552	0	0	3.02605	3.75562	TET2
phosphatidylcholine acyl-chain remodeling (GO:0036151)	1-22	0.289068	0.472552	0	0	3.02605	3.75562	DBI
plasma membrane invagination (GO:0099024)	1-22	0.289068	0.472552	0	0	3.02605	3.75562	ITGB2
regulation of protein localization to membrane (GO:1905475)	1-22	0.289068	0.472552	0	0	3.02605	3.75562	SLC5A3
positive regulation of B cell proliferation (GO:0030890)	1-22	0.289068	0.472552	0	0	3.02605	3.75562	CD320
fatty-acyl-CoA biosynthetic process (GO:0046949)	1-22	0.289068	0.472552	0	0	3.02605	3.75562	TECR
respiratory tube development (GO:0030323)	1-22	0.289068	0.472552	0	0	3.02605	3.75562	ABCA3
heterotypic cell-cell adhesion (GO:0034113)	1-22	0.289068	0.472552	0	0	3.02605	3.75562	ITGB2
histone H3-K4 methylation (GO:0051568)	1-22	0.289068	0.472552	0	0	3.02605	3.75562	TET2
positive regulation of phosphate metabolic process (GO:0045937)	1-22	0.289068	0.472552	0	0	3.02605	3.75562	APP
synaptic vesicle cycle (GO:0099504)	1-22	0.289068	0.472552	0	0	3.02605	3.75562	CPLX1
maintenance of blood-brain barrier (GO:0035633)	1-22	0.289068	0.472552	0	0	3.02605	3.75562	CLDN1
maturation of SSU-rRNA from tricistronic rRNA transcript (SSU-rRNA, 5.8S rRNA, LSU-rRNA) (GO:0000462)	1-22	0.289068	0.472552	0	0	3.02605	3.75562	NGDN
positive regulation of small GTPase mediated signal transduction (GO:0051057)	1-22	0.289068	0.472552	0	0	3.02605	3.75562	LRRC59
positive regulation of cell population proliferation (GO:0008284)	0	0.289726	0.473101	0	0	1.32145	1.63704	EFNB2	CDKN1A	RPS9	HMOX1	SSR1	PTN	CRLF1
regulation of cell cycle phase transition (GO:1901987)	2-95	0.29146	0.475404	0	0	1.8895	2.32947	PSMA6	CDKN1A
regulation of vesicle-mediated transport (GO:0060627)	2-96	0.295639	0.478773	0	0	1.8693	2.27796	SCARB1	CPLX1
negative regulation of DNA binding (GO:0043392)	1-22	0.297113	0.478773	0	0	2.92504	3.54995	JUN
regulation of calcium ion-dependent exocytosis (GO:0017158)	1-22	0.297113	0.478773	0	0	2.92504	3.54995	SYT11
negative regulation of interleukin-6 production (GO:0032715)	1-22	0.297113	0.478773	0	0	2.92504	3.54995	SYT11
regulation of cellular pH (GO:0030641)	1-22	0.297113	0.478773	0	0	2.92504	3.54995	SLC9A8
regulation of developmental growth (GO:0048638)	1-22	0.297113	0.478773	0	0	2.92504	3.54995	APP
negative regulation of response to DNA damage stimulus (GO:2001021)	1-22	0.297113	0.478773	0	0	2.92504	3.54995	PTTG1IP
regulation of potassium ion transport (GO:0043266)	1-22	0.297113	0.478773	0	0	2.92504	3.54995	CD63
regulation of transmembrane receptor protein serine/threonine kinase signaling pathway (GO:0090092)	1-22	0.297113	0.478773	0	0	2.92504	3.54995	TWSG1
positive regulation of leukocyte cell-cell adhesion (GO:1903039)	1-22	0.297113	0.478773	0	0	2.92504	3.54995	ITGB2
triglyceride homeostasis (GO:0070328)	1-22	0.297113	0.478773	0	0	2.92504	3.54995	SCARB1
glycosaminoglycan biosynthetic process (GO:0006024)	2-97	0.299814	0.482596	0	0	1.84953	2.22793	SDC4	AGRN
activation of phospholipase C activity (GO:0007202)	1-32	0.305068	0.484151	0	0	2.83054	3.36047	PLCG1
negative regulation of developmental growth (GO:0048640)	1-32	0.305068	0.484151	0	0	2.83054	3.36047	CDKN1A
negative regulation of DNA biosynthetic process (GO:2000279)	1-32	0.305068	0.484151	0	0	2.83054	3.36047	CDKN1A
regulation of cell migration involved in sprouting angiogenesis (GO:0090049)	1-32	0.305068	0.484151	0	0	2.83054	3.36047	HMOX1
regulation of cellular amide metabolic process (GO:0034248)	1-32	0.305068	0.484151	0	0	2.83054	3.36047	APP
regulation of cellular biosynthetic process (GO:0031326)	1-32	0.305068	0.484151	0	0	2.83054	3.36047	CTNS
regulation of chemotaxis (GO:0050920)	1-32	0.305068	0.484151	0	0	2.83054	3.36047	EFNB2
regulation of NMDA receptor activity (GO:2000310)	1-32	0.305068	0.484151	0	0	2.83054	3.36047	APP
response to amino acid (GO:0043200)	1-32	0.305068	0.484151	0	0	2.83054	3.36047	TMBIM6
positive regulation of glucose transmembrane transport (GO:0010828)	1-32	0.305068	0.484151	0	0	2.83054	3.36047	RHOQ
intra-Golgi vesicle-mediated transport (GO:0006891)	1-32	0.305068	0.484151	0	0	2.83054	3.36047	GOLGA5
liver development (GO:0001889)	1-32	0.305068	0.484151	0	0	2.83054	3.36047	CEBPG
modulation by host of symbiont process (GO:0051851)	1-32	0.305068	0.484151	0	0	2.83054	3.36047	JUN
positive regulation of stress-activated MAPK cascade (GO:0032874)	2-99	0.308152	0.488518	0	0	1.81121	2.13209	APP	TRAF4
cell-matrix adhesion (GO:0007160)	0	0.312314	0.489751	0	0	1.79264	2.08618	CD63	ITGB2
organic acid transport (GO:0015849)	0	0.312314	0.489751	0	0	1.79264	2.08618	SLCO2B1	SLC19A1
positive regulation of translation (GO:0045727)	0	0.312314	0.489751	0	0	1.79264	2.08618	RPS9	RPL26
apoptotic cell clearance (GO:0043277)	1-33	0.312933	0.489751	0	0	2.74194	3.18549	SCARB1
bile acid metabolic process (GO:0008206)	1-33	0.312933	0.489751	0	0	2.74194	3.18549	HSD3B7
regulation of cholesterol efflux (GO:0010874)	1-33	0.312933	0.489751	0	0	2.74194	3.18549	ABCA3
phosphatidylcholine biosynthetic process (GO:0006656)	1-33	0.312933	0.489751	0	0	2.74194	3.18549	ABHD3
positive regulation of ATP metabolic process (GO:1903580)	1-33	0.312933	0.489751	0	0	2.74194	3.18549	APP
regulation of sprouting angiogenesis (GO:1903670)	1-33	0.312933	0.489751	0	0	2.74194	3.18549	JAK1
positive regulation of cholesterol transport (GO:0032376)	1-33	0.312933	0.489751	0	0	2.74194	3.18549	ABCA3
mitotic G2 DNA damage checkpoint signaling (GO:0007095)	1-33	0.312933	0.489751	0	0	2.74194	3.18549	CDKN1A
very long-chain fatty acid metabolic process (GO:0000038)	1-33	0.312933	0.489751	0	0	2.74194	3.18549	TECR
cation transport (GO:0006812)	0	0.314064	0.490997	0	0	1.54221	1.78612	NDFIP1	SLC22A18	PIEZO1
regulation of cell death (GO:0010941)	0	0.320622	0.49454	0	0	1.75661	1.99813	TRIM13	CRYAB
calcium-mediated signaling (GO:0019722)	0	0.320622	0.49454	0	0	1.75661	1.99813	BCAP31	PLCG1
positive regulation of vasculature development (GO:1904018)	0	0.320622	0.49454	0	0	1.75661	1.99813	HMOX1	PLCG1
negative regulation of mitochondrion organization (GO:0010823)	1-34	0.32071	0.49454	0	0	2.65872	3.02354	PRELID1
positive regulation of calcium ion transport into cytosol (GO:0010524)	1-34	0.32071	0.49454	0	0	2.65872	3.02354	PLCG1
female gamete generation (GO:0007292)	1-34	0.32071	0.49454	0	0	2.65872	3.02354	PTN
regulation of transmembrane transport (GO:0034762)	1-34	0.32071	0.49454	0	0	2.65872	3.02354	SLC2A1
positive regulation of DNA binding (GO:0043388)	1-34	0.32071	0.49454	0	0	2.65872	3.02354	CEBPG
positive regulation of epidermal growth factor receptor signaling pathway (GO:0045742)	1-34	0.32071	0.49454	0	0	2.65872	3.02354	DGKD
sister chromatid segregation (GO:0000819)	1-34	0.32071	0.49454	0	0	2.65872	3.02354	TOP2A
positive regulation of pri-miRNA transcription by RNA polymerase II (GO:1902895)	1-34	0.32071	0.49454	0	0	2.65872	3.02354	JUN
synaptic vesicle recycling (GO:0036465)	1-34	0.32071	0.49454	0	0	2.65872	3.02354	CANX
positive regulation of release of sequestered calcium ion into cytosol (GO:0051281)	1-34	0.32071	0.49454	0	0	2.65872	3.02354	PLCG1
glycerophospholipid biosynthetic process (GO:0046474)	0	0.323332	0.49806	0	0	1.51539	1.71099	DGKD	ABHD3	FAR1
regulation of translation (GO:0006417)	0	0.326421	0.498542	0	0	1.50665	1.68679	APP	RPL13A	RPL26
acylglycerol catabolic process (GO:0046464)	1-35	0.328399	0.498542	0	0	2.58039	2.87333	ABHD2
negative regulation of cell cycle G1/S phase transition (GO:1902807)	1-35	0.328399	0.498542	0	0	2.58039	2.87333	CDKN1A
regulation of autophagosome assembly (GO:2000785)	1-35	0.328399	0.498542	0	0	2.58039	2.87333	TMEM39A
bicarbonate transport (GO:0015701)	1-35	0.328399	0.498542	0	0	2.58039	2.87333	CA13
negative regulation of neurogenesis (GO:0050768)	1-35	0.328399	0.498542	0	0	2.58039	2.87333	PTN
negative regulation of organelle assembly (GO:1902116)	1-35	0.328399	0.498542	0	0	2.58039	2.87333	TMEM39A
cellular response to amyloid-beta (GO:1904646)	1-35	0.328399	0.498542	0	0	2.58039	2.87333	APP
negative regulation of T cell proliferation (GO:0042130)	1-35	0.328399	0.498542	0	0	2.58039	2.87333	SDC4
regulation of regulated secretory pathway (GO:1903305)	1-35	0.328399	0.498542	0	0	2.58039	2.87333	SYT11
respiratory system development (GO:0060541)	1-35	0.328399	0.498542	0	0	2.58039	2.87333	ABCA3
positive regulation of lipid biosynthetic process (GO:0046889)	1-35	0.328399	0.498542	0	0	2.58039	2.87333	SCARB1
lung development (GO:0030324)	1-35	0.328399	0.498542	0	0	2.58039	2.87333	ABCA3
maturation of SSU-rRNA (GO:0030490)	1-35	0.328399	0.498542	0	0	2.58039	2.87333	NGDN
protein stabilization (GO:0050821)	0	0.329511	0.499713	0	0	1.49801	1.66301	CDKN1A	NCLN	CRYAB
regulation of JNK cascade (GO:0046328)	0	0.333036	0.504538	0	0	1.70518	1.87486	APP	TRAF4
regulation of cell cycle G1/S phase transition (GO:1902806)	1-36	0.336002	0.505379	0	0	2.50654	2.73373	CDKN1A
cellular response to heat (GO:0034605)	1-36	0.336002	0.505379	0	0	2.50654	2.73373	HMOX1
cyclic-nucleotide-mediated signaling (GO:0019935)	1-36	0.336002	0.505379	0	0	2.50654	2.73373	ADGRG6
regulation of microtubule-based process (GO:0032886)	1-36	0.336002	0.505379	0	0	2.50654	2.73373	MAP6
regulation of ossification (GO:0030278)	1-36	0.336002	0.505379	0	0	2.50654	2.73373	PTN
regulation of receptor internalization (GO:0002090)	1-36	0.336002	0.505379	0	0	2.50654	2.73373	CD63
mitochondrion disassembly (GO:0061726)	1-36	0.336002	0.505379	0	0	2.50654	2.73373	SQSTM1
small GTPase mediated signal transduction (GO:0007264)	0	0.337161	0.506604	0	0	1.6887	1.83595	JUN	CDKN1A
negative regulation of G1/S transition of mitotic cell cycle (GO:2000134)	1-37	0.343518	0.51041	0	0	2.43679	2.60375	CDKN1A
regulation of glucose import (GO:0046324)	1-37	0.343518	0.51041	0	0	2.43679	2.60375	RHOQ
regulation of intracellular pH (GO:0051453)	1-37	0.343518	0.51041	0	0	2.43679	2.60375	SLC9A8
regulation of microtubule cytoskeleton organization (GO:0070507)	1-37	0.343518	0.51041	0	0	2.43679	2.60375	MAP6
phagocytosis, engulfment (GO:0006911)	1-37	0.343518	0.51041	0	0	2.43679	2.60375	ITGB2
phagosome maturation (GO:0090382)	1-37	0.343518	0.51041	0	0	2.43679	2.60375	MREG
phospholipid biosynthetic process (GO:0008654)	1-37	0.343518	0.51041	0	0	2.43679	2.60375	FAR1
glutamate receptor signaling pathway (GO:0007215)	1-37	0.343518	0.51041	0	0	2.43679	2.60375	APP
positive regulation of exocytosis (GO:0045921)	1-37	0.343518	0.51041	0	0	2.43679	2.60375	SDC4
lysosome localization (GO:0032418)	1-37	0.343518	0.51041	0	0	2.43679	2.60375	MAP6
ncRNA metabolic process (GO:0034660)	1-37	0.343518	0.51041	0	0	2.43679	2.60375	NIFK
modulation of chemical synaptic transmission (GO:0050804)	0	0.349487	0.518305	0	0	1.6411	1.72528	APP	CPLX1
regulation of apoptotic signaling pathway (GO:2001233)	1-38	0.35095	0.518305	0	0	2.37081	2.4825	TMBIM6
regulation of cell communication (GO:0010646)	1-38	0.35095	0.518305	0	0	2.37081	2.4825	NCLN
connective tissue development (GO:0061448)	1-38	0.35095	0.518305	0	0	2.37081	2.4825	CREB3L2
positive regulation of insulin secretion (GO:0032024)	1-38	0.35095	0.518305	0	0	2.37081	2.4825	TM7SF3
synaptic vesicle endocytosis (GO:0048488)	1-38	0.35095	0.518305	0	0	2.37081	2.4825	CANX
regulation of interleukin-6 production (GO:0032675)	0	0.353578	0.521137	0	0	1.62583	1.69029	APP	SYT11
regulation of protein kinase activity (GO:0045859)	0	0.353578	0.521137	0	0	1.62583	1.69029	CDKN1A	TRAF4
cellular divalent inorganic cation homeostasis (GO:0072503)	0	0.357661	0.521291	0	0	1.61083	1.6562	MT2A	SLC30A1
regulation of Wnt signaling pathway (GO:0030111)	0	0.357661	0.521291	0	0	1.61083	1.6562	APP	VGLL4
negative regulation of lymphocyte proliferation (GO:0050672)	1-39	0.358298	0.521291	0	0	2.3083	2.36922	SDC4
regulation of cellular component biogenesis (GO:0044087)	1-39	0.358298	0.521291	0	0	2.3083	2.36922	NCLN
regulation of dendrite development (GO:0050773)	1-39	0.358298	0.521291	0	0	2.3083	2.36922	PTN
negative regulation of protein secretion (GO:0050709)	1-39	0.358298	0.521291	0	0	2.3083	2.36922	HMGCR
regulation of intracellular transport (GO:0032386)	1-39	0.358298	0.521291	0	0	2.3083	2.36922	CRYAB
regulation of nitric-oxide synthase activity (GO:0050999)	1-39	0.358298	0.521291	0	0	2.3083	2.36922	SCARB1
regulation of peptidyl-threonine phosphorylation (GO:0010799)	1-39	0.358298	0.521291	0	0	2.3083	2.36922	APP
endothelial cell migration (GO:0043542)	1-39	0.358298	0.521291	0	0	2.3083	2.36922	ID1
regulation of protein tyrosine kinase activity (GO:0061097)	1-39	0.358298	0.521291	0	0	2.3083	2.36922	APP
regulation of viral entry into host cell (GO:0046596)	1-39	0.358298	0.521291	0	0	2.3083	2.36922	IFITM3
vesicle cytoskeletal trafficking (GO:0099518)	1-39	0.358298	0.521291	0	0	2.3083	2.36922	MYO1E
positive regulation of cell migration (GO:0030335)	0	0.361749	0.52579	0	0	1.32647	1.34876	F10	PLCG1	CLDN1	CXCL16
regulation of cell population proliferation (GO:0042127)	0	0.363116	0.526125	0	0	1.16785	1.18307	EFNB2	APP	SQLE	JUN	CDKN1A	RPS9	FTH1	SSR1	PTN	CRLF1
negative regulation of blood coagulation (GO:0030195)	1-40	0.365564	0.526125	0	0	2.249	2.2632	F10
autophagy of mitochondrion (GO:0000422)	1-40	0.365564	0.526125	0	0	2.249	2.2632	SQSTM1
positive regulation of catalytic activity (GO:0043085)	1-40	0.365564	0.526125	0	0	2.249	2.2632	SLC5A3
fatty acid derivative biosynthetic process (GO:1901570)	1-40	0.365564	0.526125	0	0	2.249	2.2632	FAR1
positive regulation of intrinsic apoptotic signaling pathway (GO:2001244)	1-40	0.365564	0.526125	0	0	2.249	2.2632	BCAP31
ribosomal small subunit biogenesis (GO:0042274)	1-40	0.365564	0.526125	0	0	2.249	2.2632	RPS5
lymphocyte migration (GO:0072676)	1-40	0.365564	0.526125	0	0	2.249	2.2632	CKLF
synaptic vesicle exocytosis (GO:0016079)	1-40	0.365564	0.526125	0	0	2.249	2.2632	CPLX1
positive regulation of wound healing (GO:0090303)	1-40	0.365564	0.526125	0	0	2.249	2.2632	CLDN1
activation of protein kinase activity (GO:0032147)	0	0.369853	0.530737	0	0	1.56744	1.55906	TNFRSF10B	TNFRSF10A
response to lipid (GO:0033993)	0	0.369853	0.530737	0	0	1.56744	1.55906	PAQR8	PAQR7
positive regulation of kinase activity (GO:0033674)	0	0.369853	0.530737	0	0	1.56744	1.55906	CDKN1A	TRAF4
carbohydrate catabolic process (GO:0016052)	1-41	0.372747	0.53074	0	0	2.19267	2.16384	LDHA
carboxylic acid transmembrane transport (GO:1905039)	1-41	0.372747	0.53074	0	0	2.19267	2.16384	SLC19A1
nucleobase-containing compound catabolic process (GO:0034655)	1-41	0.372747	0.53074	0	0	2.19267	2.16384	ENTPD4
regulation of mitochondrial membrane potential (GO:0051881)	1-41	0.372747	0.53074	0	0	2.19267	2.16384	PRELID1
regulation of protein dephosphorylation (GO:0035304)	1-41	0.372747	0.53074	0	0	2.19267	2.16384	ENSA
endosome organization (GO:0007032)	1-41	0.372747	0.53074	0	0	2.19267	2.16384	SQSTM1
regulation of release of cytochrome c from mitochondria (GO:0090199)	1-41	0.372747	0.53074	0	0	2.19267	2.16384	PRELID1
regulation of response to DNA damage stimulus (GO:2001020)	1-41	0.372747	0.53074	0	0	2.19267	2.16384	MCL1
sphingolipid metabolic process (GO:0006665)	0	0.37793	0.537598	0	0	1.53979	1.49828	ORMDL2	TECR
protein localization to membrane (GO:0072657)	0	0.378784	0.537724	0	0	1.37206	1.33198	ITGB2	PTN	AGRN
regulation of DNA recombination (GO:0000018)	1-42	0.37985	0.537724	0	0	2.13908	2.07058	H1-4
cellular respiration (GO:0045333)	1-42	0.37985	0.537724	0	0	2.13908	2.07058	MTFR2
regulation of nervous system development (GO:0051960)	1-42	0.37985	0.537724	0	0	2.13908	2.07058	PTN
heterophilic cell-cell adhesion via plasma membrane cell adhesion molecules (GO:0007157)	1-42	0.37985	0.537724	0	0	2.13908	2.07058	DCHS1
regulation of cellular response to stress (GO:0080135)	0	0.385964	0.544514	0	0	1.51308	1.44047	CRYAB	MCL1
positive regulation of axonogenesis (GO:0050772)	1-43	0.386872	0.544514	0	0	2.08804	1.98293	MAP6
signal release from synapse (GO:0099643)	1-43	0.386872	0.544514	0	0	2.08804	1.98293	CPLX1
positive regulation of peptide hormone secretion (GO:0090277)	1-43	0.386872	0.544514	0	0	2.08804	1.98293	TM7SF3
positive regulation of phospholipase C activity (GO:0010863)	1-43	0.386872	0.544514	0	0	2.08804	1.98293	PLCG1
lipid modification (GO:0030258)	1-43	0.386872	0.544514	0	0	2.08804	1.98293	DGKD
negative regulation of intracellular signal transduction (GO:1902532)	0	0.387956	0.544994	0	0	1.35074	1.27897	DGKD	VGLL4	MCL1
regulation of signal transduction (GO:0009966)	0	0.387956	0.544994	0	0	1.35074	1.27897	APP	CD63	NCLN
endomembrane system organization (GO:0010256)	0	0.391006	0.548754	0	0	1.34378	1.26185	SEC61A1	GOLGA5	SQSTM1
antibacterial humoral response (GO:0019731)	1-44	0.393816	0.548832	0	0	2.03938	1.90044	SEMG1
regulation of endothelial cell apoptotic process (GO:2000351)	1-44	0.393816	0.548832	0	0	2.03938	1.90044	PLCG1
neurogenesis (GO:0022008)	1-44	0.393816	0.548832	0	0	2.03938	1.90044	DCHS1
neurotransmitter secretion (GO:0007269)	1-44	0.393816	0.548832	0	0	2.03938	1.90044	CPLX1
positive regulation of biosynthetic process (GO:0009891)	1-44	0.393816	0.548832	0	0	2.03938	1.90044	SLC5A3
response to amyloid-beta (GO:1904645)	1-44	0.393816	0.548832	0	0	2.03938	1.90044	APP
positive regulation of osteoblast differentiation (GO:0045669)	1-44	0.393816	0.548832	0	0	2.03938	1.90044	ATRAID
regulation of macromolecule metabolic process (GO:0060255)	0	0.394052	0.548832	0	0	1.33689	1.24501	APP	ATRAID	TAPBP
regulation of DNA repair (GO:0006282)	1-45	0.400681	0.554905	0	0	1.99293	1.82272	CEBPG
negative regulation of T cell activation (GO:0050868)	1-45	0.400681	0.554905	0	0	1.99293	1.82272	SDC4
cellular response to radiation (GO:0071478)	1-45	0.400681	0.554905	0	0	1.99293	1.82272	CDKN1A
positive regulation of chemotaxis (GO:0050921)	1-45	0.400681	0.554905	0	0	1.99293	1.82272	PTN
mitotic G2/M transition checkpoint (GO:0044818)	1-45	0.400681	0.554905	0	0	1.99293	1.82272	CDKN1A
zymogen activation (GO:0031638)	1-45	0.400681	0.554905	0	0	1.99293	1.82272	PRSS12
regulation of angiogenesis (GO:0045765)	0	0.403168	0.557298	0	0	1.31664	1.19604	COL4A2	HMOX1	PLCG1
axon guidance (GO:0007411)	0	0.403168	0.557298	0	0	1.31664	1.19604	EFNB2	NFIB	PLCG1
positive regulation of epithelial cell proliferation (GO:0050679)	0	0.405847	0.559031	0	0	1.45019	1.30775	PTN	CLDN1
regulation of B cell proliferation (GO:0030888)	1-46	0.407468	0.559031	0	0	1.94854	1.74939	CD320
negative regulation of tumor necrosis factor production (GO:0032720)	1-46	0.407468	0.559031	0	0	1.94854	1.74939	SYT11
erythrocyte differentiation (GO:0030218)	1-46	0.407468	0.559031	0	0	1.94854	1.74939	CEBPG
establishment of protein localization to extracellular region (GO:0035592)	1-46	0.407468	0.559031	0	0	1.94854	1.74939	CANX
interleukin-12-mediated signaling pathway (GO:0035722)	1-46	0.407468	0.559031	0	0	1.94854	1.74939	JAK1
positive regulation of organelle assembly (GO:1902117)	1-46	0.407468	0.559031	0	0	1.94854	1.74939	SDC4
posttranscriptional regulation of gene expression (GO:0010608)	1-46	0.407468	0.559031	0	0	1.94854	1.74939	APP
fatty acid metabolic process (GO:0006631)	0	0.409787	0.561164	0	0	1.43823	1.28307	ACSM6	MSMO1
regulation of tumor necrosis factor production (GO:0032680)	0	0.409787	0.561164	0	0	1.43823	1.28307	APP	SYT11
cellular response to oxidative stress (GO:0034599)	0	0.413715	0.563499	0	0	1.42647	1.25897	JUN	HMOX1
regulation of phosphorylation (GO:0042325)	0	0.413715	0.563499	0	0	1.42647	1.25897	APP	CDKN1A
negative regulation of cold-induced thermogenesis (GO:0120163)	1-47	0.414179	0.563499	0	0	1.90609	1.68013	ID1
regulation of synapse assembly (GO:0051963)	1-47	0.414179	0.563499	0	0	1.90609	1.68013	APP
regulation of T cell activation (GO:0050863)	1-47	0.414179	0.563499	0	0	1.90609	1.68013	PRELID1
regulation of wound healing (GO:0061041)	1-47	0.414179	0.563499	0	0	1.90609	1.68013	CLDN1
positive regulation of pathway-restricted SMAD protein phosphorylation (GO:0010862)	1-47	0.414179	0.563499	0	0	1.90609	1.68013	TWSG1
negative regulation of cell growth (GO:0030308)	0	0.417629	0.56571	0	0	1.41489	1.23543	CDKN1A	VGLL4
synapse organization (GO:0050808)	0	0.417629	0.56571	0	0	1.41489	1.23543	APP	AGRN
purine ribonucleotide biosynthetic process (GO:0009152)	1-48	0.420814	0.56571	0	0	1.86544	1.61465	COASY
cellular response to interleukin-12 (GO:0071349)	1-48	0.420814	0.56571	0	0	1.86544	1.61465	JAK1
negative regulation of tumor necrosis factor superfamily cytokine production (GO:1903556)	1-48	0.420814	0.56571	0	0	1.86544	1.61465	SYT11
regulation of mitochondrion organization (GO:0010821)	1-48	0.420814	0.56571	0	0	1.86544	1.61465	SQSTM1
nucleus organization (GO:0006997)	1-48	0.420814	0.56571	0	0	1.86544	1.61465	CEP55
phosphatidic acid biosynthetic process (GO:0006654)	1-48	0.420814	0.56571	0	0	1.86544	1.61465	DGKD
regulation of protein metabolic process (GO:0051246)	1-48	0.420814	0.56571	0	0	1.86544	1.61465	APP
establishment of protein localization to mitochondrion (GO:0072655)	1-48	0.420814	0.56571	0	0	1.86544	1.61465	BCAP31
positive regulation of DNA repair (GO:0045739)	1-48	0.420814	0.56571	0	0	1.86544	1.61465	CEBPG
inositol phosphate metabolic process (GO:0043647)	1-48	0.420814	0.56571	0	0	1.86544	1.61465	PLCG1
myelination (GO:0042552)	1-48	0.420814	0.56571	0	0	1.86544	1.61465	ADGRG6
positive regulation of intracellular signal transduction (GO:1902533)	0	0.421448	0.566043	0	0	1.14066	0.985601	BCAP31	APP	NDFIP1	F10	TRIM13	HMOX1	TNFRSF10B
negative regulation of catabolic process (GO:0009895)	1-49	0.427375	0.569833	0	0	1.82648	1.55268	HMGCR
adherens junction organization (GO:0034332)	1-49	0.427375	0.569833	0	0	1.82648	1.55268	DCHS1
negative regulation of cell projection organization (GO:0031345)	1-49	0.427375	0.569833	0	0	1.82648	1.55268	EFNB2
receptor internalization (GO:0031623)	1-49	0.427375	0.569833	0	0	1.82648	1.55268	ITGB2
regulation of cellular protein metabolic process (GO:0032268)	1-49	0.427375	0.569833	0	0	1.82648	1.55268	APP
regulation of smooth muscle cell proliferation (GO:0048660)	1-49	0.427375	0.569833	0	0	1.82648	1.55268	HMOX1
response to hydrogen peroxide (GO:0042542)	1-49	0.427375	0.569833	0	0	1.82648	1.55268	HMOX1
mitotic cytokinesis (GO:0000281)	1-49	0.427375	0.569833	0	0	1.82648	1.55268	CEP55
regulation of cell cycle (GO:0051726)	0	0.430515	0.573499	0	0	1.20215	1.01314	RNF167	JUN	CDKN1A	PRR11
regulation of response to external stimulus (GO:0032101)	0	0.433153	0.574827	0	0	1.3704	1.14656	EFNB2	PSMA6
G2/M transition of mitotic cell cycle (GO:0000086)	0	0.433153	0.574827	0	0	1.3704	1.14656	CDKN1A	ENSA
chloride transmembrane transport (GO:1902476)	1-50	0.433862	0.574827	0	0	1.78912	1.49396	APOL1
phosphatidic acid metabolic process (GO:0046473)	1-50	0.433862	0.574827	0	0	1.78912	1.49396	DGKD
ribosome assembly (GO:0042255)	1-50	0.433862	0.574827	0	0	1.78912	1.49396	RPS5
iron ion transport (GO:0006826)	1-50	0.433862	0.574827	0	0	1.78912	1.49396	FTH1
cell cycle G2/M phase transition (GO:0044839)	0	0.437	0.577942	0	0	1.3597	1.12559	CDKN1A	ENSA
cellular response to hypoxia (GO:0071456)	0	0.437	0.577942	0	0	1.3597	1.12559	PSMA6	HMOX1
regulation of axonogenesis (GO:0050770)	1-51	0.440275	0.579143	0	0	1.75324	1.43828	MAP6
regulation of cellular amine metabolic process (GO:0033238)	1-51	0.440275	0.579143	0	0	1.75324	1.43828	PSMA6
negative regulation of protein ubiquitination (GO:0031397)	1-51	0.440275	0.579143	0	0	1.75324	1.43828	SQSTM1
cholesterol transport (GO:0030301)	1-51	0.440275	0.579143	0	0	1.75324	1.43828	SCARB1
intrinsic apoptotic signaling pathway in response to DNA damage (GO:0008630)	1-51	0.440275	0.579143	0	0	1.75324	1.43828	MCL1
mitotic metaphase plate congression (GO:0007080)	1-51	0.440275	0.579143	0	0	1.75324	1.43828	CEP55
regulation of exocytosis (GO:0017157)	1-52	0.446616	0.583303	0	0	1.71878	1.38543	CPLX1
endocytic recycling (GO:0032456)	1-52	0.446616	0.583303	0	0	1.71878	1.38543	CMTM6
regulation of release of sequestered calcium ion into cytosol (GO:0051279)	1-52	0.446616	0.583303	0	0	1.71878	1.38543	PLCG1
positive regulation of developmental growth (GO:0048639)	1-52	0.446616	0.583303	0	0	1.71878	1.38543	AGRN
sprouting angiogenesis (GO:0002040)	1-52	0.446616	0.583303	0	0	1.71878	1.38543	EFNB2
positive regulation of protein localization to cell periphery (GO:1904377)	1-52	0.446616	0.583303	0	0	1.71878	1.38543	SQSTM1
positive regulation of protein localization to plasma membrane (GO:1903078)	1-52	0.446616	0.583303	0	0	1.71878	1.38543	SQSTM1
myeloid cell differentiation (GO:0030099)	1-52	0.446616	0.583303	0	0	1.71878	1.38543	TET2
bicellular tight junction assembly (GO:0070830)	1-53	0.452886	0.589394	0	0	1.68564	1.33522	CLDN1
positive regulation of B cell activation (GO:0050871)	1-53	0.452886	0.589394	0	0	1.68564	1.33522	CD320
positive regulation of macroautophagy (GO:0016239)	1-53	0.452886	0.589394	0	0	1.68564	1.33522	TRIM13
positive regulation of NIK/NF-kappaB signaling (GO:1901224)	1-53	0.452886	0.589394	0	0	1.68564	1.33522	APP
cellular calcium ion homeostasis (GO:0006874)	0	0.456018	0.592945	0	0	1.30864	1.02757	CCDC47	SLC30A1
positive regulation of cell motility (GO:2000147)	0	0.456915	0.593253	0	0	1.20681	0.945247	F10	CLDN1	CXCL16
regulation of cellular amino acid metabolic process (GO:0006521)	1-54	0.459084	0.593253	0	0	1.65375	1.28748	PSMA6
regulation of cyclin-dependent protein kinase activity (GO:1904029)	1-54	0.459084	0.593253	0	0	1.65375	1.28748	CDKN1A
negative regulation of viral genome replication (GO:0045071)	1-54	0.459084	0.593253	0	0	1.65375	1.28748	IFITM3
regulation of potassium ion transmembrane transport (GO:1901379)	1-54	0.459084	0.593253	0	0	1.65375	1.28748	CD63
positive regulation of leukocyte chemotaxis (GO:0002690)	1-54	0.459084	0.593253	0	0	1.65375	1.28748	PTN
inorganic anion transport (GO:0015698)	1-54	0.459084	0.593253	0	0	1.65375	1.28748	TTYH3
regulation of apoptotic process (GO:0042981)	0	0.462252	0.596822	0	0	1.07738	0.831354	TOP2A	JUN	PRELID1	TNFRSF10B	TNFRSF10A	TMBIM6	CRYAB	SQSTM1	MCL1
protein targeting to mitochondrion (GO:0006626)	1-55	0.465213	0.596969	0	0	1.62305	1.24205	BCAP31
pyruvate metabolic process (GO:0006090)	1-55	0.465213	0.596969	0	0	1.62305	1.24205	LDHA
regulation of blood vessel endothelial cell migration (GO:0043535)	1-55	0.465213	0.596969	0	0	1.62305	1.24205	PLCG1
negative regulation of protein modification by small protein conjugation or removal (GO:1903321)	1-55	0.465213	0.596969	0	0	1.62305	1.24205	SQSTM1
ceramide metabolic process (GO:0006672)	1-55	0.465213	0.596969	0	0	1.62305	1.24205	ORMDL2
glycoprotein metabolic process (GO:0009100)	1-55	0.465213	0.596969	0	0	1.62305	1.24205	MGAT4A
positive regulation of response to DNA damage stimulus (GO:2001022)	1-55	0.465213	0.596969	0	0	1.62305	1.24205	CEBPG
regulation of cellular component organization (GO:0051128)	0	0.467251	0.598538	0	0	1.27978	0.973772	NCLN	EBAG9
positive regulation of response to external stimulus (GO:0032103)	0	0.467251	0.598538	0	0	1.27978	0.973772	APP	PTN
negative regulation of apoptotic process (GO:0043066)	0	0.469196	0.600025	0	0	1.0986	0.831346	PRELID1	TMBIM6	CRYAB	SQSTM1	CRLF1	MCL1
neuron projection morphogenesis (GO:0048812)	0	0.470965	0.600025	0	0	1.27045	0.956608	APP	MAP6
autophagosome organization (GO:1905037)	1-56	0.471273	0.600025	0	0	1.59345	1.19878	TMEM41B
negative regulation of metabolic process (GO:0009892)	1-56	0.471273	0.600025	0	0	1.59345	1.19878	ID1
positive regulation of interleukin-1 beta production (GO:0032731)	1-56	0.471273	0.600025	0	0	1.59345	1.19878	APP
tight junction assembly (GO:0120192)	1-56	0.471273	0.600025	0	0	1.59345	1.19878	CLDN1
mitochondrial transport (GO:0006839)	1-56	0.471273	0.600025	0	0	1.59345	1.19878	BCAP31
negative regulation of cell cycle G2/M phase transition (GO:1902750)	1-57	0.477264	0.603466	0	0	1.56492	1.15755	PSMA6
negative regulation of DNA recombination (GO:0045910)	1-57	0.477264	0.603466	0	0	1.56492	1.15755	H1-4
cellular response to peptide (GO:1901653)	1-57	0.477264	0.603466	0	0	1.56492	1.15755	APP
dicarboxylic acid metabolic process (GO:0043648)	1-57	0.477264	0.603466	0	0	1.56492	1.15755	SLC19A1
regulation of reactive oxygen species metabolic process (GO:2000377)	1-57	0.477264	0.603466	0	0	1.56492	1.15755	CDKN1A
positive regulation of gene expression, epigenetic (GO:0045815)	1-57	0.477264	0.603466	0	0	1.56492	1.15755	H1-4
positive regulation of interferon-gamma production (GO:0032729)	1-57	0.477264	0.603466	0	0	1.56492	1.15755	CEBPG
monocarboxylic acid transport (GO:0015718)	1-57	0.477264	0.603466	0	0	1.56492	1.15755	SLCO2B1
Ras protein signal transduction (GO:0007265)	0	0.478347	0.604314	0	0	1.25217	0.923374	JUN	CDKN1A
negative regulation of DNA-binding transcription factor activity (GO:0043433)	0	0.482014	0.605739	0	0	1.24322	0.907284	ID1	CEBPG
nitrogen compound transport (GO:0071705)	0	0.482014	0.605739	0	0	1.24322	0.907284	CMTM6	CD320
monocarboxylic acid metabolic process (GO:0032787)	0	0.482014	0.605739	0	0	1.24322	0.907284	LDHA	MSMO1
receptor metabolic process (GO:0043112)	1-58	0.483188	0.605739	0	0	1.53739	1.11822	ITGB2
autophagosome assembly (GO:0000045)	1-58	0.483188	0.605739	0	0	1.53739	1.11822	TMEM41B
negative regulation of neuron projection development (GO:0010977)	1-58	0.483188	0.605739	0	0	1.53739	1.11822	EFNB2
regulation of neurotransmitter receptor activity (GO:0099601)	1-58	0.483188	0.605739	0	0	1.53739	1.11822	APP
regulation of pathway-restricted SMAD protein phosphorylation (GO:0060393)	1-58	0.483188	0.605739	0	0	1.53739	1.11822	TWSG1
positive regulation of protein binding (GO:0032092)	1-58	0.483188	0.605739	0	0	1.53739	1.11822	APP
negative regulation of autophagy (GO:0010507)	1-59	0.489045	0.609956	0	0	1.5108	1.08068	MCL1
positive regulation of apoptotic signaling pathway (GO:2001235)	1-59	0.489045	0.609956	0	0	1.5108	1.08068	BCAP31
regulation of secretion by cell (GO:1903530)	1-59	0.489045	0.609956	0	0	1.5108	1.08068	CPLX1
selective autophagy (GO:0061912)	1-59	0.489045	0.609956	0	0	1.5108	1.08068	SQSTM1
positive regulation of tyrosine phosphorylation of STAT protein (GO:0042531)	1-59	0.489045	0.609956	0	0	1.5108	1.08068	CRLF1
mitotic DNA damage checkpoint signaling (GO:0044773)	1-59	0.489045	0.609956	0	0	1.5108	1.08068	CDKN1A
apical junction assembly (GO:0043297)	1-60	0.494836	0.616132	0	0	1.48512	1.04483	CLDN1
cellular protein catabolic process (GO:0044257)	1-60	0.494836	0.616132	0	0	1.48512	1.04483	PSMA6
positive regulation of intracellular protein transport (GO:0090316)	0	0.50011	0.621153	0	0	1.20034	0.831751	SAR1A	ITGB2
B cell differentiation (GO:0030183)	1-61	0.500561	0.621153	0	0	1.4603	1.01056	CEBPG
regulation of endocytosis (GO:0030100)	1-61	0.500561	0.621153	0	0	1.4603	1.01056	SYT11
O-glycan processing (GO:0016266)	1-61	0.500561	0.621153	0	0	1.4603	1.01056	ST6GAL1
positive regulation of hydrolase activity (GO:0051345)	0	0.50368	0.624495	0	0	1.19212	0.81757	ARHGAP11A	AGRN
positive regulation of cysteine-type endopeptidase activity (GO:2001056)	1-62	0.506222	0.626589	0	0	1.43628	0.977793	BCAP31
positive regulation of interleukin-1 production (GO:0032732)	1-62	0.506222	0.626589	0	0	1.43628	0.977793	APP
brain development (GO:0007420)	0	0.507234	0.626784	0	0	1.184	0.803679	NFIB	CTNS
regulation of cytokine production (GO:0001817)	0	0.507234	0.626784	0	0	1.184	0.803679	TWSG1	SYT11
axonogenesis (GO:0007409)	0	0.511337	0.62822	0	0	1.10899	0.743827	EFNB2	APP	PLCG1
cellular protein localization (GO:0034613)	0	0.511608	0.62822	0	0	1.07825	0.722641	CD63	SAR1A	ID1	TRIM23
actin cytoskeleton reorganization (GO:0031532)	1-63	0.511819	0.62822	0	0	1.41305	0.946435	ANTXR1
cell cycle G1/S phase transition (GO:0044843)	1-63	0.511819	0.62822	0	0	1.41305	0.946435	CDKN1A
cellular response to reactive oxygen species (GO:0034614)	1-63	0.511819	0.62822	0	0	1.41305	0.946435	JUN
positive regulation of DNA metabolic process (GO:0051054)	1-63	0.511819	0.62822	0	0	1.41305	0.946435	CEBPG
positive regulation of Ras protein signal transduction (GO:0046579)	1-63	0.511819	0.62822	0	0	1.41305	0.946435	LRRC59
positive regulation of viral process (GO:0048524)	1-63	0.511819	0.62822	0	0	1.41305	0.946435	TMEM39A
protein secretion (GO:0009306)	1-64	0.517353	0.631842	0	0	1.39055	0.916411	CANX
antimicrobial humoral immune response mediated by antimicrobial peptide (GO:0061844)	1-64	0.517353	0.631842	0	0	1.39055	0.916411	SEMG1
regulation of cellular ketone metabolic process (GO:0010565)	1-64	0.517353	0.631842	0	0	1.39055	0.916411	PSMA6
plasma membrane organization (GO:0007009)	1-64	0.517353	0.631842	0	0	1.39055	0.916411	SYT11
lipid homeostasis (GO:0055088)	1-64	0.517353	0.631842	0	0	1.39055	0.916411	ORMDL2
pre-replicative complex assembly (GO:0036388)	1-64	0.517353	0.631842	0	0	1.39055	0.916411	PSMA6
positive regulation of protein kinase activity (GO:0045860)	0	0.521284	0.636114	0	0	1.15261	0.750877	CDKN1A	TRAF4
regulation of RNA metabolic process (GO:0051252)	1-65	0.522825	0.636407	0	0	1.36875	0.887647	ESRP2
inorganic anion transmembrane transport (GO:0098661)	1-65	0.522825	0.636407	0	0	1.36875	0.887647	APOL1
protein autoubiquitination (GO:0051865)	1-65	0.522825	0.636407	0	0	1.36875	0.887647	TRIM13
cellular response to interleukin-1 (GO:0071347)	0	0.524755	0.638228	0	0	1.14502	0.738333	PSMA6	SQSTM1
negative regulation of G2/M transition of mitotic cell cycle (GO:0010972)	1-66	0.528234	0.640866	0	0	1.34762	0.860074	PSMA6
cell-cell junction assembly (GO:0007043)	1-66	0.528234	0.640866	0	0	1.34762	0.860074	DCHS1
positive regulation of cell cycle (GO:0045787)	1-66	0.528234	0.640866	0	0	1.34762	0.860074	APP
anion transmembrane transport (GO:0098656)	1-67	0.533583	0.646287	0	0	1.32714	0.83363	SLC19A1
regulation of epidermal growth factor receptor signaling pathway (GO:0042058)	1-67	0.533583	0.646287	0	0	1.32714	0.83363	DGKD
T cell receptor signaling pathway (GO:0050852)	0	0.535066	0.647549	0	0	1.12283	0.702176	PSMA6	PLCG1
negative regulation of transforming growth factor beta receptor signaling pathway (GO:0030512)	1-68	0.538871	0.65108	0	0	1.30726	0.808254	PEG10
regulation of tyrosine phosphorylation of STAT protein (GO:0042509)	1-68	0.538871	0.65108	0	0	1.30726	0.808254	CRLF1
cellular response to calcium ion (GO:0071277)	1-69	0.5441	0.655778	0	0	1.28797	0.78389	SYT11
cellular response to decreased oxygen levels (GO:0036294)	1-69	0.5441	0.655778	0	0	1.28797	0.78389	HMOX1
RNA 3'-end processing (GO:0031123)	1-69	0.5441	0.655778	0	0	1.28797	0.78389	MAGOHB
protein ubiquitination (GO:0016567)	0	0.546281	0.657868	0	0	1.01182	0.61177	PCNP	RNF167	PSMA6	TRIM13	TRIM23	UBE2J1
cellular response to light stimulus (GO:0071482)	1-70	0.549269	0.660382	0	0	1.26924	0.760488	RPL26
COPII-coated vesicle budding (GO:0090114)	1-70	0.549269	0.660382	0	0	1.26924	0.760488	SAR1A
negative regulation of neuron apoptotic process (GO:0043524)	1-71	0.55438	0.661651	0	0	1.25105	0.737999	CRLF1
regulation of G1/S transition of mitotic cell cycle (GO:2000045)	1-71	0.55438	0.661651	0	0	1.25105	0.737999	CDKN1A
regulation of glycolytic process (GO:0006110)	1-71	0.55438	0.661651	0	0	1.25105	0.737999	APP
regulation of hematopoietic stem cell differentiation (GO:1902036)	1-71	0.55438	0.661651	0	0	1.25105	0.737999	PSMA6
cholesterol homeostasis (GO:0042632)	1-71	0.55438	0.661651	0	0	1.25105	0.737999	SCARB1
Fc-gamma receptor signaling pathway involved in phagocytosis (GO:0038096)	1-71	0.55438	0.661651	0	0	1.25105	0.737999	PLCG1
gland development (GO:0048732)	1-71	0.55438	0.661651	0	0	1.25105	0.737999	CEBPG
response to metal ion (GO:0010038)	1-71	0.55438	0.661651	0	0	1.25105	0.737999	MT2A
myeloid leukocyte differentiation (GO:0002573)	1-71	0.55438	0.661651	0	0	1.25105	0.737999	CDKN1A
negative regulation of epithelial cell proliferation (GO:0050680)	1-72	0.559434	0.663903	0	0	1.23336	0.716376	NFIB
negative regulation of supramolecular fiber organization (GO:1902904)	1-72	0.559434	0.663903	0	0	1.23336	0.716376	CRYAB
cytoskeleton-dependent cytokinesis (GO:0061640)	1-72	0.559434	0.663903	0	0	1.23336	0.716376	CEP55
Fc-gamma receptor signaling pathway (GO:0038094)	1-72	0.559434	0.663903	0	0	1.23336	0.716376	PLCG1
positive regulation of neurogenesis (GO:0050769)	1-72	0.559434	0.663903	0	0	1.23336	0.716376	MAP6
sterol homeostasis (GO:0055092)	1-72	0.559434	0.663903	0	0	1.23336	0.716376	SCARB1
positive regulation of protein secretion (GO:0050714)	1-72	0.559434	0.663903	0	0	1.23336	0.716376	TM7SF3
positive regulation of cellular process (GO:0048522)	0	0.562933	0.667516	0	0	0.990764	0.569288	EFNB2	RPS9	TRIM13	SSR1	PTN	CRLF1	CXCL16
chromatin assembly (GO:0031497)	1-73	0.56443	0.667674	0	0	1.21617	0.695577	H1-4
neurotransmitter transport (GO:0006836)	1-73	0.56443	0.667674	0	0	1.21617	0.695577	CPLX1
insulin receptor signaling pathway (GO:0008286)	1-73	0.56443	0.667674	0	0	1.21617	0.695577	RHOQ
cellular protein-containing complex assembly (GO:0034622)	0	0.568318	0.670815	0	0	1.05465	0.595955	NSG2	DNAJB12
proteolysis involved in cellular protein catabolic process (GO:0051603)	1-74	0.56937	0.670815	0	0	1.19945	0.675561	PSMA6
regulation of cytokine-mediated signaling pathway (GO:0001959)	1-74	0.56937	0.670815	0	0	1.19945	0.675561	JAK1
cellular response to amino acid starvation (GO:0034198)	1-74	0.56937	0.670815	0	0	1.19945	0.675561	CDKN1A
Fc receptor mediated stimulatory signaling pathway (GO:0002431)	1-74	0.56937	0.670815	0	0	1.19945	0.675561	PLCG1
regulation of hematopoietic progenitor cell differentiation (GO:1901532)	1-75	0.574254	0.673327	0	0	1.18318	0.656292	PSMA6
fibroblast growth factor receptor signaling pathway (GO:0008543)	1-75	0.574254	0.673327	0	0	1.18318	0.656292	ESRP2
regulation of transcription from RNA polymerase II promoter in response to hypoxia (GO:0061418)	1-75	0.574254	0.673327	0	0	1.18318	0.656292	PSMA6
response to amino acid starvation (GO:1990928)	1-75	0.574254	0.673327	0	0	1.18318	0.656292	CDKN1A
positive regulation of immune response (GO:0050778)	1-75	0.574254	0.673327	0	0	1.18318	0.656292	ITGB2
positive regulation of lymphocyte proliferation (GO:0050671)	1-75	0.574254	0.673327	0	0	1.18318	0.656292	CD320
positive regulation of transcription by RNA polymerase II (GO:0045944)	0	0.578626	0.674678	0	0	0.97315	0.532409	APP	JUN	CRTC3	NFIB	SATB2	CEBPG	TET2	AGRN	SQSTM1	RHOQ
regulation of BMP signaling pathway (GO:0030510)	1-76	0.579083	0.674678	0	0	1.16735	0.637733	TWSG1
establishment of protein localization to organelle (GO:0072594)	1-76	0.579083	0.674678	0	0	1.16735	0.637733	PTTG1IP
regulation of T cell proliferation (GO:0042129)	1-76	0.579083	0.674678	0	0	1.16735	0.637733	SDC4
positive regulation of growth (GO:0045927)	1-76	0.579083	0.674678	0	0	1.16735	0.637733	CXCL16
positive regulation of interleukin-6 production (GO:0032755)	1-76	0.579083	0.674678	0	0	1.16735	0.637733	APP
RNA transport (GO:0050658)	1-76	0.579083	0.674678	0	0	1.16735	0.637733	MAGOHB
protein import into nucleus (GO:0006606)	1-76	0.579083	0.674678	0	0	1.16735	0.637733	PTTG1IP
negative regulation of signal transduction (GO:0009968)	0	0.583431	0.677552	0	0	0.994191	0.535698	TMBIM6	VGLL4	DLK1
protein deubiquitination (GO:0016579)	0	0.583431	0.677552	0	0	0.994191	0.535698	PSMA6	DESI2	JOSD1
negative regulation of developmental process (GO:0051093)	1-77	0.583858	0.677552	0	0	1.15193	0.619851	NFIB
import into nucleus (GO:0051170)	1-77	0.583858	0.677552	0	0	1.15193	0.619851	PTTG1IP
positive regulation of tumor necrosis factor production (GO:0032760)	1-77	0.583858	0.677552	0	0	1.15193	0.619851	APP
negative regulation of blood vessel morphogenesis (GO:2000181)	1-78	0.588578	0.68249	0	0	1.13691	0.602615	COL4A2
mitochondrion organization (GO:0007005)	0	0.590558	0.684245	0	0	1.01161	0.532804	BCAP31	MTFR2
axon development (GO:0061564)	1-79	0.593245	0.685196	0	0	1.12228	0.585995	APP
regulation of cellular response to heat (GO:1900034)	1-79	0.593245	0.685196	0	0	1.12228	0.585995	CRYAB
regulation of ion transport (GO:0043269)	1-79	0.593245	0.685196	0	0	1.12228	0.585995	SYT11
positive regulation of proteasomal ubiquitin-dependent protein catabolic process (GO:0032436)	1-79	0.593245	0.685196	0	0	1.12228	0.585995	BCAP31
negative regulation of cell cycle (GO:0045786)	1-80	0.59786	0.6889	0	0	1.10802	0.569962	RNF167
regulation of NIK/NF-kappaB signaling (GO:1901222)	1-80	0.59786	0.6889	0	0	1.10802	0.569962	APP
skin development (GO:0043588)	1-80	0.59786	0.6889	0	0	1.10802	0.569962	CLDN1
regulation of mitotic cell cycle (GO:0007346)	0	0.599826	0.690624	0	0	0.994217	0.508159	APP	PSMA6
protein transport (GO:0015031)	0	0.602229	0.691984	0	0	0.958114	0.485876	SAR1A	CANX	CMTM6	TRIM23
positive regulation of cellular amide metabolic process (GO:0034250)	1-81	0.602422	0.691984	0	0	1.09411	0.554492	RPL26
positive regulation of tumor necrosis factor superfamily cytokine production (GO:1903557)	1-81	0.602422	0.691984	0	0	1.09411	0.554492	APP
positive regulation of cellular biosynthetic process (GO:0031328)	0	0.605918	0.694449	0	0	0.982945	0.492467	SCARB1	RPL26
protein modification by small protein removal (GO:0070646)	0	0.605923	0.694449	0	0	0.960972	0.481449	PSMA6	DESI2	JOSD1
positive regulation of protein phosphorylation (GO:0001934)	0	0.60649	0.694449	0	0	0.952795	0.476461	APP	TWSG1	CDKN1A	TRAF4
regulation of cyclin-dependent protein serine/threonine kinase activity (GO:0000079)	1-82	0.606933	0.694449	0	0	1.08055	0.539557	CDKN1A
ephrin receptor signaling pathway (GO:0048013)	1-82	0.606933	0.694449	0	0	1.08055	0.539557	EFNB2
regulation of defense response (GO:0031347)	1-83	0.611393	0.696836	0	0	1.06732	0.525136	PSMA6
regulation of interleukin-1 beta production (GO:0032651)	1-83	0.611393	0.696836	0	0	1.06732	0.525136	APP
regulation of Notch signaling pathway (GO:0008593)	1-83	0.611393	0.696836	0	0	1.06732	0.525136	DLK1
regulation of osteoblast differentiation (GO:0045667)	1-83	0.611393	0.696836	0	0	1.06732	0.525136	ATRAID
glycoprotein biosynthetic process (GO:0009101)	1-83	0.611393	0.696836	0	0	1.06732	0.525136	B3GALNT2
negative regulation of cytokine production (GO:0001818)	0	0.611939	0.696917	0	0	0.971925	0.477335	TWSG1	SYT11
anaphase-promoting complex-dependent catabolic process (GO:0031145)	1-84	0.615803	0.699148	0	0	1.0544	0.511205	PSMA6
nuclear export (GO:0051168)	1-84	0.615803	0.699148	0	0	1.0544	0.511205	MAGOHB
response to insulin (GO:0032868)	1-84	0.615803	0.699148	0	0	1.0544	0.511205	RHOQ
lymphocyte differentiation (GO:0030098)	1-84	0.615803	0.699148	0	0	1.0544	0.511205	CEBPG
B cell activation (GO:0042113)	1-85	0.620163	0.702468	0	0	1.0418	0.497744	CEBPG
G1/S transition of mitotic cell cycle (GO:0000082)	1-85	0.620163	0.702468	0	0	1.0418	0.497744	CDKN1A
retrograde vesicle-mediated transport, Golgi to endoplasmic reticulum (GO:0006890)	1-85	0.620163	0.702468	0	0	1.0418	0.497744	TAPBP
antigen receptor-mediated signaling pathway (GO:0050851)	0	0.620839	0.702692	0	0	0.955845	0.455636	PSMA6	PLCG1
negative regulation of phosphorylation (GO:0042326)	1-86	0.624473	0.705174	0	0	1.02949	0.484733	CDKN1A
regulation of interferon-gamma production (GO:0032649)	1-86	0.624473	0.705174	0	0	1.02949	0.484733	CEBPG
response to interleukin-1 (GO:0070555)	1-86	0.624473	0.705174	0	0	1.02949	0.484733	APP
negative regulation of angiogenesis (GO:0016525)	1-87	0.628735	0.709441	0	0	1.01747	0.472152	COL4A2
proteolysis (GO:0006508)	0	0.632305	0.71255	0	0	0.92323	0.423193	PSMA6	DESI2	AEBP1
regulation of GTPase activity (GO:0043087)	0	0.632461	0.71255	0	0	0.935208	0.428453	ARHGAP11A	AGRN
retrograde transport, endosome to Golgi (GO:0042147)	1-88	0.632948	0.712552	0	0	1.00572	0.459983	RHOBTB3
neutrophil degranulation (GO:0043312)	0	0.636369	0.714503	0	0	0.91724	0.414571	CD63	FTH1	ITGB2	CMTM6	FTL
regulation of cation channel activity (GO:2001257)	1-89	0.637114	0.714503	0	0	0.994242	0.448211	APP
regulation of cysteine-type endopeptidase activity involved in apoptotic process (GO:0043281)	1-89	0.637114	0.714503	0	0	0.994242	0.448211	BCAP31
positive regulation of inflammatory response (GO:0050729)	1-89	0.637114	0.714503	0	0	0.994242	0.448211	APP
SCF-dependent proteasomal ubiquitin-dependent protein catabolic process (GO:0031146)	1-89	0.637114	0.714503	0	0	0.994242	0.448211	PSMA6
negative regulation of Wnt signaling pathway (GO:0030178)	0	0.638168	0.715137	0	0	0.925217	0.415565	PSMA6	VGLL4
negative regulation of protein kinase activity (GO:0006469)	1-90	0.641233	0.716385	0	0	0.983021	0.436817	CDKN1A
negative regulation of translation (GO:0017148)	1-90	0.641233	0.716385	0	0	0.983021	0.436817	RPL13A
positive regulation of autophagy (GO:0010508)	1-90	0.641233	0.716385	0	0	0.983021	0.436817	TRIM13
protein complex oligomerization (GO:0051259)	1-90	0.641233	0.716385	0	0	0.983021	0.436817	CLDN1
neutrophil activation involved in immune response (GO:0002283)	0	0.643594	0.718476	0	0	0.909408	0.400764	CD63	FTH1	ITGB2	CMTM6	FTL
toll-like receptor signaling pathway (GO:0002224)	1-91	0.645306	0.719293	0	0	0.972049	0.425788	ITGB2
positive regulation of supramolecular fiber organization (GO:1902905)	1-91	0.645306	0.719293	0	0	0.972049	0.425788	APP
negative regulation of macromolecule metabolic process (GO:0010605)	0	0.646597	0.720186	0	0	0.910621	0.39706	APP	NDFIP1
neutrophil mediated immunity (GO:0002446)	0	0.648955	0.721043	0	0	0.903619	0.390718	CD63	FTH1	ITGB2	CMTM6	FTL
cellular response to fibroblast growth factor stimulus (GO:0044344)	1-92	0.649332	0.721043	0	0	0.961319	0.415108	ESRP2
positive regulation of cellular component biogenesis (GO:0044089)	1-92	0.649332	0.721043	0	0	0.961319	0.415108	SDC4
positive regulation of transmembrane receptor protein serine/threonine kinase signaling pathway (GO:0090100)	1-92	0.649332	0.721043	0	0	0.961319	0.415108	TWSG1
positive regulation of peptidyl-serine phosphorylation (GO:0033138)	1-93	0.653313	0.724916	0	0	0.950821	0.404764	APP
negative regulation of cell death (GO:0060548)	1-94	0.657249	0.727633	0	0	0.94055	0.394742	TM7SF3
nucleosome organization (GO:0034728)	1-94	0.657249	0.727633	0	0	0.94055	0.394742	H1-4
hemopoiesis (GO:0030097)	1-94	0.657249	0.727633	0	0	0.94055	0.394742	TET2
MAPK cascade (GO:0000165)	0	0.668461	0.73874	0	0	0.873274	0.351735	PSMA6	ABHD17B	JAK1
protein maturation (GO:0051604)	1-97	0.668791	0.73874	0	0	0.911019	0.366487	AEBP1
calcium ion homeostasis (GO:0055074)	1-97	0.668791	0.73874	0	0	0.911019	0.366487	SLC30A1
antigen processing and presentation of exogenous peptide antigen via MHC class II (GO:0019886)	1-98	0.672552	0.739143	0	0	0.901581	0.357635	CANX
negative regulation of neuron death (GO:1901215)	1-98	0.672552	0.739143	0	0	0.901581	0.357635	CRLF1
regulation of neuron apoptotic process (GO:0043523)	1-98	0.672552	0.739143	0	0	0.901581	0.357635	CRLF1
regulation of peptidyl-serine phosphorylation (GO:0033135)	1-98	0.672552	0.739143	0	0	0.901581	0.357635	APP
positive regulation of defense response (GO:0031349)	1-98	0.672552	0.739143	0	0	0.901581	0.357635	APP
RNA splicing (GO:0008380)	1-98	0.672552	0.739143	0	0	0.901581	0.357635	MAGOHB
transmembrane receptor protein tyrosine kinase signaling pathway (GO:0007169)	0	0.672681	0.739143	0	0	0.872703	0.346013	EFNB2	COL4A2	ESRP2	RHOQ
response to UV (GO:0009411)	1-99	0.676271	0.741977	0	0	0.892336	0.349048	RPL26
mRNA-containing ribonucleoprotein complex export from nucleus (GO:0071427)	1-99	0.676271	0.741977	0	0	0.892336	0.349048	MAGOHB
regulation of inflammatory response (GO:0050727)	0	0.67877	0.744163	0	0	0.85653	0.331882	APP	PSMA6
antigen processing and presentation of peptide antigen via MHC class II (GO:0002495)	0	0.679947	0.744342	0	0	0.883277	0.340716	CANX
regulation of transforming growth factor beta receptor signaling pathway (GO:0017015)	0	0.679947	0.744342	0	0	0.883277	0.340716	PEG10
mitotic cell cycle phase transition (GO:0044772)	0	0.686432	0.74946	0	0	0.843987	0.317548	CDKN1A	ENSA
cell junction assembly (GO:0034329)	0	0.687175	0.74946	0	0	0.865699	0.324781	DCHS1
regulation of protein catabolic process (GO:0042176)	0	0.687175	0.74946	0	0	0.865699	0.324781	HMGCR
positive regulation of cell growth (GO:0030307)	0	0.687175	0.74946	0	0	0.865699	0.324781	CXCL16
mitotic sister chromatid segregation (GO:0000070)	0	0.687175	0.74946	0	0	0.865699	0.324781	CEP55
antigen processing and presentation of exogenous peptide antigen (GO:0002478)	0	0.690728	0.752218	0	0	0.857168	0.317159	CANX
chromatin remodeling (GO:0006338)	0	0.690728	0.752218	0	0	0.857168	0.317159	SATB2
positive regulation of transcription, DNA-templated (GO:0045893)	0	0.691285	0.752246	0	0	0.890827	0.328896	APP	H1-4	JUN	CRTC3	NFIB	SATB2	CREB3L2	CEBPG	TET2	AGRN	SQSTM1	RHOQ
protein polyubiquitination (GO:0000209)	0	0.691779	0.752246	0	0	0.84191	0.310234	RNF167	PSMA6	UBE2J1
cellular metal ion homeostasis (GO:0006875)	0	0.694241	0.753806	0	0	0.848803	0.309758	SLC30A1
mRNA transport (GO:0051028)	0	0.694241	0.753806	0	0	0.848803	0.309758	MAGOHB
positive regulation of GTPase activity (GO:0043547)	0	0.69887	0.758272	0	0	0.823871	0.295185	ARHGAP11A	AGRN
cellular response to peptide hormone stimulus (GO:0071375)	0	0.701148	0.758501	0	0	0.83255	0.295585	RHOQ
chromosome organization (GO:0051276)	0	0.701148	0.758501	0	0	0.83255	0.295585	TOP2A
RNA export from nucleus (GO:0006405)	0	0.701148	0.758501	0	0	0.83255	0.295585	MAGOHB
protein localization to nucleus (GO:0034504)	0	0.701148	0.758501	0	0	0.83255	0.295585	PTTG1IP
response to calcium ion (GO:0051592)	0	0.704543	0.761052	0	0	0.824654	0.288799	SYT11
mRNA export from nucleus (GO:0006406)	0	0.704543	0.761052	0	0	0.824654	0.288799	MAGOHB
negative regulation of transmembrane receptor protein serine/threonine kinase signaling pathway (GO:0090101)	0	0.7079	0.764115	0	0	0.816906	0.282202	PEG10
response to tumor necrosis factor (GO:0034612)	0	0.714499	0.770672	0	0	0.801835	0.269555	CXCL16
regulation of protein serine/threonine kinase activity (GO:0071900)	0	0.717743	0.773603	0	0	0.794505	0.263492	CDKN1A
regulation of macroautophagy (GO:0016241)	0	0.720951	0.775921	0	0	0.787307	0.257595	TRIM13
phosphatidylinositol metabolic process (GO:0046488)	0	0.720951	0.775921	0	0	0.787307	0.257595	PLCG1
cellular response to lectin (GO:1990858)	0	0.730357	0.784254	0	0	0.766472	0.240843	PSMA6
stimulatory C-type lectin receptor signaling pathway (GO:0002223)	0	0.730357	0.784254	0	0	0.766472	0.240843	PSMA6
positive regulation of protein metabolic process (GO:0051247)	0	0.730357	0.784254	0	0	0.766472	0.240843	APP
regulation of intracellular signal transduction (GO:1902531)	0	0.73083	0.784254	0	0	0.804819	0.25237	ARHGAP11A	TRAF4	SQSTM1	RHOQ
positive regulation of cytokine production (GO:0001819)	0	0.732844	0.785312	0	0	0.787806	0.244867	APP	CEBPG	HMOX1
cytosolic transport (GO:0016482)	0	0.733421	0.785312	0	0	0.759768	0.235555	RHOBTB3
tumor necrosis factor-mediated signaling pathway (GO:0033209)	0	0.733421	0.785312	0	0	0.759768	0.235555	PSMA6
intracellular protein transport (GO:0006886)	0	0.734688	0.786095	0	0	0.7854	0.242146	SAR1A	PTTG1IP	TRIM23
adenylate cyclase-activating G protein-coupled receptor signaling pathway (GO:0007189)	0	0.739447	0.790035	0	0	0.746705	0.225395	ADGRG6
positive regulation of protein-containing complex assembly (GO:0031334)	0	0.739447	0.790035	0	0	0.746705	0.225395	PIEZO1
innate immune response activating cell surface receptor signaling pathway (GO:0002220)	0	0.742408	0.792622	0	0	0.740339	0.220514	PSMA6
cytoskeleton organization (GO:0007010)	0	0.745337	0.794593	0	0	0.73408	0.21576	RHOBTB3
macroautophagy (GO:0016236)	0	0.745337	0.794593	0	0	0.73408	0.21576	SQSTM1
regulation of mRNA catabolic process (GO:0061013)	0	0.751094	0.799569	0	0	0.721873	0.206618	PSMA6
potassium ion transport (GO:0006813)	0	0.751094	0.799569	0	0	0.721873	0.206618	SLC9A8
regulation of anatomical structure morphogenesis (GO:0022603)	0	0.753924	0.802	0	0	0.71592	0.202222	HMOX1
defense response to symbiont (GO:0140546)	0	0.756722	0.804393	0	0	0.710063	0.197937	IFITM3
cellular response to DNA damage stimulus (GO:0006974)	0	0.759465	0.806726	0	0	0.753169	0.207228	TOP2A	CDKN1A	MCL1
membrane organization (GO:0061024)	0	0.761161	0.807943	0	0	0.726711	0.198327	SAR1A	CEP55
circulatory system development (GO:0072359)	0	0.762223	0.808485	0	0	0.698631	0.18969	CDKN1A
anterograde trans-synaptic signaling (GO:0098916)	0	0.765155	0.811009	0	0	0.720632	0.192896	SYPL1	CPLX1
plasma membrane bounded cell projection organization (GO:0120036)	0	0.7676	0.813013	0	0	0.687559	0.18185	APP
cellular response to insulin stimulus (GO:0032869)	0	0.770243	0.813465	0	0	0.682153	0.178076	RHOQ
DNA-dependent DNA replication (GO:0006261)	0	0.770243	0.813465	0	0	0.682153	0.178076	PSMA6
positive regulation of macromolecule biosynthetic process (GO:0010557)	0	0.770243	0.813465	0	0	0.682153	0.178076	RPL26
muscle contraction (GO:0006936)	0	0.770243	0.813465	0	0	0.682153	0.178076	CRYAB
negative regulation of nucleic acid-templated transcription (GO:1903507)	0	0.772411	0.814467	0	0	0.756522	0.195363	JUN	ID1	CRYAB	VGLL4
positive regulation of canonical Wnt signaling pathway (GO:0090263)	0	0.772856	0.814467	0	0	0.67683	0.174394	PSMA6
Golgi organization (GO:0007030)	0	0.772856	0.814467	0	0	0.67683	0.174394	GOLGA5
defense response to virus (GO:0051607)	0	0.780519	0.821953	0	0	0.661347	0.163879	IFITM3
positive regulation of peptidyl-tyrosine phosphorylation (GO:0050731)	0	0.783016	0.823991	0	0	0.656341	0.160543	CRLF1
negative regulation of inflammatory response to antigenic stimulus (GO:0002862)	0	0.787925	0.82797	0	0	0.646551	0.154107	PLCG1
ribonucleoprotein complex assembly (GO:0022618)	0	0.787925	0.82797	0	0	0.646551	0.154107	RPS5
regulation of inflammatory response to antigenic stimulus (GO:0002861)	0	0.790337	0.829911	0	0	0.641765	0.151004	PLCG1
positive regulation of cell differentiation (GO:0045597)	0	0.791522	0.830561	0	0	0.680734	0.159154	PTN	ATRAID
potassium ion transmembrane transport (GO:0071805)	0	0.795081	0.8337	0	0	0.632399	0.145016	SLC9A8
enzyme linked receptor protein signaling pathway (GO:0007167)	0	0.797413	0.834952	0	0	0.627818	0.142127	PTN
transcription initiation from RNA polymerase II promoter (GO:0006367)	0	0.797413	0.834952	0	0	0.627818	0.142127	MED26
chromatin organization (GO:0006325)	0	0.801998	0.839154	0	0	0.618849	0.136549	SATB2
protein-DNA complex assembly (GO:0065004)	0	0.804251	0.840314	0	0	0.61446	0.133856	PSMA6
neuron development (GO:0048666)	0	0.804251	0.840314	0	0	0.61446	0.133856	APP
regulation of protein phosphorylation (GO:0001932)	0	0.805393	0.840908	0	0	0.659835	0.142805	APP	ITGB2
negative regulation of cell migration (GO:0030336)	0	0.806479	0.841444	0	0	0.610132	0.131226	HMOX1
regulation of mRNA stability (GO:0043488)	0	0.810859	0.845413	0	0	0.601655	0.126143	PSMA6
positive regulation of macromolecule metabolic process (GO:0010604)	0	0.811908	0.845905	0	0	0.684757	0.142682	APP	CD63	MED26
positive regulation of cytosolic calcium ion concentration (GO:0007204)	0	0.813012	0.846455	0	0	0.597504	0.123689	BCAP31
regulation of cytosolic calcium ion concentration (GO:0051480)	0	0.815141	0.84747	0	0	0.593409	0.121289	BCAP31
positive regulation of transferase activity (GO:0051347)	0	0.815141	0.84747	0	0	0.593409	0.121289	DBI
regulation of G2/M transition of mitotic cell cycle (GO:0010389)	0	0.817245	0.849056	0	0	0.589369	0.118944	PSMA6
inorganic cation transmembrane transport (GO:0098662)	0	0.818441	0.849696	0	0	0.640165	0.12826	SLC9A8	SLC30A1
positive regulation of Wnt signaling pathway (GO:0030177)	0	0.825427	0.856345	0	0	0.573743	0.110075	PSMA6
phosphorylation (GO:0016310)	0	0.833058	0.863374	0	0	0.656617	0.119933	APP	DGKD	JAK1
cellular response to growth factor stimulus (GO:0071363)	0	0.835144	0.863374	0	0	0.555329	0.100043	PLCG1
cellular response to starvation (GO:0009267)	0	0.835144	0.863374	0	0	0.555329	0.100043	CDKN1A
organonitrogen compound biosynthetic process (GO:1901566)	0	0.835144	0.863374	0	0	0.555329	0.100043	ABHD3
skeletal system development (GO:0001501)	0	0.835144	0.863374	0	0	0.555329	0.100043	CREB3L2
response to lipopolysaccharide (GO:0032496)	0	0.837022	0.864098	0	0	0.551786	0.0981658	SCARB1
protein autophosphorylation (GO:0046777)	0	0.837022	0.864098	0	0	0.551786	0.0981658	EIF2AK1
positive regulation of protein kinase B signaling (GO:0051897)	0	0.840713	0.867299	0	0	0.544833	0.0945311	F10
regulation of cell migration (GO:0030334)	0	0.842849	0.868892	0	0	0.643381	0.109998	F10	CLDN1	CXCL16
protein modification by small protein conjugation (GO:0032446)	0	0.844037	0.869506	0	0	0.641764	0.108817	PCNP	TRIM13	TRIM23
heart development (GO:0007507)	0	0.846095	0.871015	0	0	0.534724	0.0893648	CDKN1A
negative regulation of canonical Wnt signaling pathway (GO:0090090)	0	0.847849	0.871598	0	0	0.531436	0.0877151	PSMA6
adenylate cyclase-modulating G protein-coupled receptor signaling pathway (GO:0007188)	0	0.847849	0.871598	0	0	0.531436	0.0877151	ADGRG6
DNA-templated transcription, initiation (GO:0006352)	0	0.852991	0.876271	0	0	0.52181	0.0829711	MED26
neuron projection development (GO:0031175)	0	0.85796	0.880759	0	0	0.512523	0.0785175	APP
positive regulation of ERK1 and ERK2 cascade (GO:0070374)	0	0.859579	0.881804	0	0	0.5095	0.0770939	APP
organelle assembly (GO:0070925)	0	0.862022	0.883693	0	0	0.616921	0.0915972	SQLE	TMEM41B	ABCA3
chemical synaptic transmission (GO:0007268)	0	0.863144	0.884226	0	0	0.57184	0.0841598	SYPL1	CPLX1
defense response to bacterium (GO:0042742)	0	0.865873	0.886402	0	0	0.497752	0.0716851	SEMG1
positive regulation of developmental process (GO:0051094)	0	0.867402	0.887349	0	0	0.494899	0.0704009	PTN
negative regulation of immune response (GO:0050777)	0	0.868913	0.888276	0	0	0.492078	0.0691428	PLCG1
regulation of immune response (GO:0050776)	0	0.870408	0.888567	0	0	0.489288	0.06791	ITGB2
RNA processing (GO:0006396)	0	0.870408	0.888567	0	0	0.489288	0.06791	MAGOHB
regulation of mitotic cell cycle phase transition (GO:1901990)	0	0.883118	0.900915	0	0	0.465526	0.0578632	PSMA6
cellular response to tumor necrosis factor (GO:0071356)	0	0.890894	0.908217	0	0	0.450915	0.0520942	PSMA6
cellular protein modification process (GO:0006464)	0	0.898069	0.914896	0	0	0.676824	0.0727644	B3GALNT2	APP	PSMA6	GOLM1	MGAT4A	MXRA8	APOL1	JAK1
regulation of protein kinase B signaling (GO:0051896)	0	0.90602	0.922356	0	0	0.422179	0.0416667	F10
negative regulation of inflammatory response (GO:0050728)	0	0.911264	0.92641	0	0	0.41207	0.0382904	PLCG1
phosphate-containing compound metabolic process (GO:0006796)	0	0.911264	0.92641	0	0	0.41207	0.0382904	PLCG1
positive regulation of gene expression (GO:0010628)	0	0.912158	0.926677	0	0	0.541908	0.0498242	APP	RPL26	MED26
positive regulation of protein modification process (GO:0031401)	0	0.91328	0.927175	0	0	0.408159	0.0370253	APP
protein phosphorylation (GO:0006468)	0	0.921638	0.935013	0	0	0.526137	0.0429344	APP	EIF2AK1	JAK1
inflammatory response (GO:0006954)	0	0.927845	0.940661	0	0	0.37933	0.0284082	ITGB2
regulation of autophagy (GO:0010506)	0	0.92867	0.940847	0	0	0.377662	0.0279477	MCL1
positive regulation of nucleic acid-templated transcription (GO:1903508)	0	0.930754	0.942308	0	0	0.510204	0.0366125	JUN	NFIB	CREB3L2
regulation of ERK1 and ERK2 cascade (GO:0070372)	0	0.934187	0.945132	0	0	0.366376	0.0249425	APP
RNA splicing, via transesterification reactions with bulged adenosine as nucleophile (GO:0000377)	0	0.943329	0.953059	0	0	0.347093	0.0202494	MAGOHB
positive regulation of signal transduction (GO:0009967)	0	0.943978	0.953059	0	0	0.345693	0.0199301	CD63
regulation of canonical Wnt signaling pathway (GO:0060828)	0	0.944619	0.953059	0	0	0.344303	0.0196162	PSMA6
positive regulation of phosphorylation (GO:0042327)	0	0.944619	0.953059	0	0	0.344303	0.0196162	APP
negative regulation of transcription by RNA polymerase II (GO:0000122)	0	0.952786	0.960638	0	0	0.505935	0.0244696	JUN	NFIB	ID1	AEBP1
positive regulation of MAPK cascade (GO:0043410)	0	0.956516	0.963076	0	0	0.317477	0.0141144	APP
mRNA splicing, via spliceosome (GO:0000398)	0	0.956516	0.963076	0	0	0.317477	0.0141144	MAGOHB
DNA metabolic process (GO:0006259)	0	0.957993	0.963903	0	0	0.313977	0.0134742	TOP2A
mRNA processing (GO:0006397)	0	0.967779	0.973082	0	0	0.289483	0.00948109	MAGOHB
regulation of transcription by RNA polymerase II (GO:0006357)	0	0.969528	0.974173	0	0	0.65343	0.0202213	APP	JUN	CDKN1A	CRTC3	SATB2	CEBPG	TET2	AEBP1	MED26	NFIB	ZFP62	CREB3L2	ID1	PLAGL2	AGRN	SQSTM1	RHOQ
transcription by RNA polymerase II (GO:0006366)	0	0.974421	0.97842	0	0	0.271055	0.00702349	MED26
cellular response to oxygen-containing compound (GO:1901701)	0	0.975292	0.978625	0	0	0.268489	0.00671707	JUN
positive regulation of multicellular organismal process (GO:0051240)	0	0.980839	0.983519	0	0	0.251034	0.00485667	PTN
negative regulation of transcription, DNA-templated (GO:0045892)	0	0.984017	0.985906	0	0	0.451793	0.00727933	JUN	ID1	AEBP1	CRYAB	VGLL4
regulation of gene expression (GO:0010468)	0	0.984563	0.985906	0	0	0.475328	0.00739485	APP	NDFIP1	ESRP2	MED26	ATRAID	TAPBP
regulation of cellular macromolecule biosynthetic process (GO:2000112)	0	0.995399	0.996077	0	0	0.183745	0.000847426	APP
regulation of transcription, DNA-templated (GO:0006355)	12-44	0.999351	0.999351	0	0	0.440709	0.00028622	JUN	CDKN1A	NFIB	ZFP62	SATB2	CREB3L2	ID1	CEBPG	PLAGL2	MED26	CRYAB	VGLL4

## Sheet: Up CC_CBD
Term	Overlap	P-value	Adjusted P-value	Old P-value	Old Adjusted P-value	Odds Ratio	Combined Score	Genes
endoplasmic reticulum membrane (GO:0005789)	30-712	5.56844e-10	1.0413e-07	0	0	4.28482	91.304	NOMO3;TMEM41B;PROS1;TECR;MSMO1;HMGCR;HSD11B2;SEC61A1;EXTL2;TMEM147;NCLN;ADGRG6;HMOX1;SSR1;SEC61B;APOL2;SEC11C;B3GALNT2;BCAP31;HSD3B7;DNAJB12;TAP1;TAPBP;SQLE;POR;CANX;TRIM13;SRPRB;TMEM39A;TMBIM6
integral component of endoplasmic reticulum membrane (GO:0030176)	9-142	3.48441e-05	0.00325792	0	0	6.12484	62.8692	BCAP31;SEC61A1;TRAM1;CCDC47;TECR;CANX;DNAJB12;TAP1;TAPBP
autolysosome (GO:0044754)	3-22	0.000161134	0.00785312	0	0	37.9891	331.769	FTH1;SQSTM1;FTL
integral component of organelle membrane (GO:0031301)	10-214	0.000167981	0.00785312	0	0	4.44127	38.602	SEC61A1;TRAM1;ENTPD4;PEX3;CCDC47;TECR;DNAJB12;TAP1;FAR1;ITM2B
bounding membrane of organelle (GO:0098588)	20-767	0.000465064	0.0173934	0	0	2.47293	18.9757	CD63;SCARB1;ST6GAL1;ENTPD4;PROS1;SLC2A1;TAP1;CTNS;ANTXR2;ANTXR1;TAPBP;GOLGA5;ABHD17B;SLC9A8;MGAT4A;EBAG9;ITM2B;RHOQ;TRIM23;CD320
secondary lysosome (GO:0005767)	3-22	0.000715191	0.0222901	0	0	20.4495	148.115	FTH1;SQSTM1;FTL
Sec61 translocon complex (GO:0005784)	2-22	0.00124304	0.033207	0	0	58.8423	393.666	SEC61A1;SEC61B
endoplasmic reticulum lumen (GO:0005788)	10-285	0.00155802	0.0364188	0	0	3.28266	21.2202	APP;F10;COL4A2;GOLM1;MGAT4A;CANX;COL6A1;MXRA8;DBI;APOL1
Golgi-associated vesicle (GO:0005798)	4-47	0.00193533	0.0402118	0	0	8.26776	51.6526	APP;MAP6;RHOQ;ITM2B
intrinsic component of endoplasmic reticulum membrane (GO:0031227)	6-121	0.00254548	0.0476006	0	0	4.66221	27.8494	SEC61A1;TRAM1;CCDC47;TECR;DNAJB12;TAP1
Golgi membrane (GO:0000139)	13-472	0.00287762	0.0488958	0	0	2.5683	15.0266	APP;ST6GAL1;ENTPD4;PROS1;RHOBTB3;SLC2A1;TAPBP;GOLGA5;NSG2;SLC9A8;MGAT4A;EBAG9;TRIM23
cytosolic large ribosomal subunit (GO:0022625)	4-55	0.0034497	0.0488958	0	0	6.96803	39.505	RPL7L1;RPL13A;RPL26;RPL7
lumenal side of endoplasmic reticulum membrane (GO:0098553)	3-22	0.00378656	0.0488958	0	0	10.6273	59.2608	BCAP31;CANX;TAPBP
integral component of lumenal side of endoplasmic reticulum membrane (GO:0071556)	3-22	0.00378656	0.0488958	0	0	10.6273	59.2608	BCAP31;CANX;TAPBP
cytoplasmic vesicle membrane (GO:0030659)	11-380	0.00411296	0.0488958	0	0	2.69055	14.7809	CD63;SCARB1;MREG;NSG2;ABHD17B;ABCA3;ANTXR2;ANTXR1;ITM2B;RHOQ;CD320
multivesicular body membrane (GO:0032585)	2-22	0.00434334	0.0488958	0	0	25.213	137.136	CD63;NSG2
large ribosomal subunit (GO:0015934)	4-59	0.00444507	0.0488958	0	0	6.45995	34.9868	RPL7L1;RPL13A;RPL26;RPL7
Golgi lumen (GO:0005796)	5-100	0.00556599	0.0578245	0	0	4.68659	24.3285	APP;SDC4;F10;PROS1;AGRN
intracellular organelle lumen (GO:0070013)	18-848	0.00789298	0.0775	0	0	1.97516	9.5633	APP;CD63;SDC4;F10;GOLM1;PROS1;ACSM6;DBI;COASY;COL4A2;FTH1;MGAT4A;CANX;COL6A1;MXRA8;SERPINI1;APOL1;AGRN
lysosome (GO:0005764)	12-477	0.00828877	0.0775	0	0	2.32849	11.1601	IFITM3;CD63;SCARB1;SDC4;SYT11;COL6A1;CYBRD1;CTNS;GC;AGRN;LIPA;TRIM23
integral component of peroxisomal membrane (GO:0005779)	2-22	0.00913478	0.081343	0	0	16.0414	75.325	PEX3;FAR1
intrinsic component of peroxisomal membrane (GO:0031231)	2-22	0.0105785	0.0899169	0	0	14.7039	66.8869	PEX3;FAR1
lipid droplet (GO:0005811)	4-77	0.0112975	0.0918537	0	0	4.86264	21.8001	BCAP31;HSD11B2;HSD3B7;C18ORF32
lysosomal lumen (GO:0043202)	4-86	0.0163972	0.127761	0	0	4.32696	17.7866	SDC4;GC;AGRN;LIPA
microbody membrane (GO:0031903)	3-52	0.0209652	0.150788	0	0	5.41548	20.9303	PEX3;FAR1;HMGCR
basement membrane (GO:0005604)	3-52	0.0209652	0.150788	0	0	5.41548	20.9303	ATRN;FRAS1;AGRN
peroxisomal membrane (GO:0005778)	3-53	0.0220422	0.152663	0	0	5.30691	20.2448	PEX3;FAR1;HMGCR
pigment granule (GO:0048770)	2-22	0.0298012	0.190193	0	0	8.01623	28.1627	MREG;CTNS
Golgi-associated vesicle membrane (GO:0030660)	2-22	0.0298012	0.190193	0	0	8.01623	28.1627	RHOQ;ITM2B
endosome membrane (GO:0010008)	8-325	0.031905	0.190193	0	0	2.25242	7.75958	IFITM3;CD63;MREG;ABHD17B;CMTM6;ANTXR2;ANTXR1;CD320
lytic vacuole membrane (GO:0098852)	7-267	0.0325015	0.190193	0	0	2.39898	8.22004	IFITM3;CD63;SCARB1;COL6A1;CYBRD1;CTNS;TRIM23
ribosome (GO:0005840)	3-62	0.0330701	0.190193	0	0	4.49533	15.3251	RPS9;RPS5;RPL13A
lysosomal membrane (GO:0005765)	8-330	0.0344462	0.190193	0	0	2.21688	7.46724	IFITM3;CD63;SCARB1;COL6A1;CMTM6;CYBRD1;CTNS;TRIM23
endosome lumen (GO:0031904)	2-22	0.0345806	0.190193	0	0	7.34747	24.7203	APP;CD63
vacuolar lumen (GO:0005775)	5-161	0.0362584	0.193724	0	0	2.84517	9.43766	SDC4;GC;AGRN;LIPA;FTL
melanosome (GO:0042470)	2-22	0.0396349	0.205881	0	0	6.78159	21.8913	MREG;CTNS
late endosome membrane (GO:0031902)	3-68	0.0417406	0.210959	0	0	4.07913	12.9565	CD63;MREG;NSG2
autophagosome (GO:0005776)	3-69	0.0432862	0.213014	0	0	4.01712	12.6134	FTH1;SQSTM1;FTL
Golgi stack (GO:0005795)	2-31	0.0476999	0.228715	0	0	6.07913	18.4977	GOLGA5;MGAT4A
vesicle membrane (GO:0012506)	3-73	0.0497502	0.232582	0	0	3.7868	11.3632	MREG;NSG2;ABCA3
late endosome (GO:0005770)	5-189	0.0637346	0.262281	0	0	2.40876	6.6314	CD63;MREG;NSG2;ABCA3;CTNS
small-subunit processome (GO:0032040)	2-37	0.0654004	0.262281	0	0	5.03546	13.7328	NGDN;FCF1
membrane attack complex (GO:0005579)	1-22	0.065921	0.262281	0	0	17.5724	47.7847	C7
alveolar lamellar body (GO:0097208)	1-22	0.065921	0.262281	0	0	17.5724	47.7847	ABCA3
nuclear envelope lumen (GO:0005641)	1-22	0.065921	0.262281	0	0	17.5724	47.7847	APP
collagen type IV trimer (GO:0005587)	1-22	0.065921	0.262281	0	0	17.5724	47.7847	COL4A2
platelet dense granule membrane (GO:0031088)	1-22	0.065921	0.262281	0	0	17.5724	47.7847	CD63
nuclear chromosome (GO:0000228)	3-83	0.0678149	0.264195	0	0	3.31177	8.91189	TOP2A;JUN;NIFK
focal adhesion (GO:0005925)	8-387	0.0734017	0.280125	0	0	1.87795	4.90484	EFNB2;RPS9;MARCKS;RPS5;ITGB2;RPL13A;RPL7;JAK1
cytosolic small ribosomal subunit (GO:0022627)	2-40	0.0749485	0.280308	0	0	4.63722	12.0148	RPS9;RPS5
cell-substrate junction (GO:0030055)	8-394	0.0795104	0.291538	0	0	1.84323	4.66681	EFNB2;RPS9;MARCKS;RPS5;ITGB2;RPL13A;RPL7;JAK1
axon (GO:0030424)	5-204	0.0822049	0.295523	0	0	2.22549	5.56049	APP;NFIB;SYT11;MAP6;PRSS12
core mediator complex (GO:0070847)	1-22	0.0869187	0.295523	0	0	12.5505	30.6581	MED26
serine C-palmitoyltransferase complex (GO:0017059)	1-22	0.0869187	0.295523	0	0	12.5505	30.6581	ORMDL2
inhibitory synapse (GO:0060077)	1-22	0.0869187	0.295523	0	0	12.5505	30.6581	SYT11
phagocytic vesicle membrane (GO:0030670)	2-45	0.0917566	0.301026	0	0	4.09697	9.78608	TAP1;TAPBP
small ribosomal subunit (GO:0015935)	2-45	0.0917566	0.301026	0	0	4.09697	9.78608	RPS9;RPS5
Hrd1p ubiquitin ligase ERAD-L complex (GO:0000839)	1-22	0.0972406	0.31302	0	0	10.9811	25.5922	FAM8A1
multivesicular body (GO:0005771)	2-47	0.0987605	0.31302	0	0	3.91448	9.06226	CD63;NSG2
trans-Golgi network membrane (GO:0032588)	3-99	0.101896	0.313945	0	0	2.75757	6.29774	APP;NSG2;RHOBTB3
phagocytic vesicle (GO:0045335)	3-100	0.104218	0.313945	0	0	2.729	6.17102	SYT11;TAP1;TAPBP
endoplasmic reticulum-Golgi intermediate compartment membrane (GO:0033116)	2-49	0.105909	0.313945	0	0	3.74753	8.41386	TAP1;TAPBP
intracellular non-membrane-bounded organelle (GO:0043232)	18-1158	0.106439	0.313945	0	0	1.41452	3.16879	TOP2A;BCAP31;JPT1;RBM28;HSD3B7;CDKN1A;RPS9;NIFK;RPS5;NGDN;FCF1;RHOBTB3;RPL13A;RPL7;HSD11B2;MYO1E;C18ORF32;RPL26
Hrd1p ubiquitin ligase complex (GO:0000836)	1-22	0.107446	0.313945	0	0	9.76049	21.7734	FAM8A1
melanosome membrane (GO:0033162)	1-22	0.127515	0.335848	0	0	7.98505	16.4454	MREG
chitosome (GO:0045009)	1-22	0.127515	0.335848	0	0	7.98505	16.4454	MREG
pigment granule membrane (GO:0090741)	1-22	0.127515	0.335848	0	0	7.98505	16.4454	MREG
early phagosome (GO:0032009)	1-22	0.127515	0.335848	0	0	7.98505	16.4454	SYT11
filopodium membrane (GO:0031527)	1-22	0.127515	0.335848	0	0	7.98505	16.4454	ANTXR1
integral component of vacuolar membrane (GO:0031166)	1-22	0.127515	0.335848	0	0	7.98505	16.4454	ENTPD4
U2-type catalytic step 1 spliceosome (GO:0071006)	1-22	0.127515	0.335848	0	0	7.98505	16.4454	MAGOHB
microvillus (GO:0005902)	2-57	0.135756	0.34351	0	0	3.20114	6.39235	MYO1E;PROM1
cis-Golgi network (GO:0005801)	2-57	0.135756	0.34351	0	0	3.20114	6.39235	GOLGA5;MAP6
lamellar body (GO:0042599)	1-22	0.13738	0.34351	0	0	7.31926	14.5288	ABCA3
nuclear lumen (GO:0031981)	12-745	0.139128	0.34351	0	0	1.45664	2.87302	TOP2A;JPT1;RBM28;JUN;CDKN1A;RPS9;NIFK;NGDN;FCF1;RPL13A;RPL26;RPL7
azurophil granule membrane (GO:0035577)	2-58	0.139609	0.34351	0	0	3.14381	6.1899	CD63;CMTM6
extracellular vesicle (GO:1903561)	2-59	0.143485	0.348464	0	0	3.0885	5.9964	ITGB2;PROM1
COPII vesicle coat (GO:0030127)	1-22	0.156778	0.361943	0	0	6.27302	11.6234	SAR1A
RNA polymerase II, core complex (GO:0005665)	1-22	0.156778	0.361943	0	0	6.27302	11.6234	POLR2M
triglyceride-rich plasma lipoprotein particle (GO:0034385)	1-22	0.156778	0.361943	0	0	6.27302	11.6234	APOL1
very-low-density lipoprotein particle (GO:0034361)	1-22	0.156778	0.361943	0	0	6.27302	11.6234	APOL1
organelle envelope lumen (GO:0031970)	2-64	0.163186	0.372144	0	0	2.83871	5.1462	APP;PRELID1
platelet alpha granule lumen (GO:0031093)	2-67	0.175227	0.39313	0	0	2.70728	4.71519	APP;PROS1
peroxisome (GO:0005777)	3-128	0.176593	0.39313	0	0	2.11469	3.66667	PEX3;FAR1;HMGCR
early endosome (GO:0005769)	5-266	0.183614	0.403951	0	0	1.69146	2.86688	IFITM3;APP;NSG2;CMTM6;CTNS
high-density lipoprotein particle (GO:0034364)	1-22	0.19428	0.422447	0	0	4.87802	7.99241	APOL1
nuclear membrane (GO:0031965)	4-204	0.200158	0.430226	0	0	1.76342	2.83672	JPT1;DNAJB12;SLC30A1;ARL6IP6
condensed nuclear chromosome (GO:0000794)	1-22	0.203394	0.432212	0	0	4.62105	7.35954	NIFK
nucleolus (GO:0005730)	11-733	0.208652	0.438403	0	0	1.35007	2.11569	TOP2A;JPT1;RBM28;CDKN1A;RPS9;NIFK;NGDN;FCF1;RPL13A;RPL26;RPL7
platelet dense granule (GO:0042827)	1-22	0.212404	0.441329	0	0	4.38978	6.80092	CD63
recycling endosome (GO:0055037)	3-145	0.225739	0.462014	0	0	1.85991	2.76825	APP;SYT11;CMTM6
P-body (GO:0000932)	2-80	0.228697	0.462014	0	0	2.25458	3.32631	PSMA6;SQSTM1
lytic vacuole (GO:0000323)	4-219	0.235755	0.462014	0	0	1.63914	2.36849	SCARB1;SYT11;CTNS;LIPA
plasma membrane raft (GO:0044853)	2-82	0.237041	0.462014	0	0	2.19799	3.16406	SCARB1;ITGB2
intrinsic component of external side of plasma membrane (GO:0031233)	1-22	0.238832	0.462014	0	0	3.81662	5.46538	F10
actin-based cell projection (GO:0098858)	2-83	0.241219	0.462014	0	0	2.17075	3.08691	MYO1E;PROM1
basolateral plasma membrane (GO:0016323)	3-151	0.243686	0.462014	0	0	1.78397	2.51874	SLC2A1;CLDN1;SLC19A1
excitatory synapse (GO:0060076)	1-22	0.247444	0.462014	0	0	3.65741	5.10784	SYT11
Golgi cis cisterna (GO:0000137)	1-22	0.247444	0.462014	0	0	3.65741	5.10784	NSG2
vesicle (GO:0031982)	4-226	0.252863	0.462014	0	0	1.58688	2.18182	MYO1E;SYT11;ITGB2;PROM1
azurophil granule (GO:0042582)	3-155	0.255776	0.462014	0	0	1.73667	2.36786	CD63;CMTM6;FTL
Golgi cisterna membrane (GO:0032580)	1-22	0.255958	0.462014	0	0	3.51093	4.7845	NSG2
collagen-containing extracellular matrix (GO:0062023)	6-380	0.260512	0.462014	0	0	1.41468	1.9029	ATRN;FRAS1;COL4A2;COL6A1;AEBP1;AGRN
myofibril (GO:0030016)	1-22	0.264377	0.462014	0	0	3.37573	4.491	PSMA6
endocytic vesicle membrane (GO:0030666)	3-158	0.264899	0.462014	0	0	1.70279	2.262	SCARB1;TAP1;TAPBP
platelet alpha granule (GO:0031091)	2-90	0.27053	0.462014	0	0	1.99736	2.6113	APP;PROS1
chromosome (GO:0005694)	3-160	0.271003	0.462014	0	0	1.68093	2.19466	TOP2A;JUN;NIFK
nuclear inner membrane (GO:0005637)	1-22	0.2727	0.462014	0	0	3.25053	4.22369	ARL6IP6
specific granule membrane (GO:0035579)	2-91	0.274719	0.462014	0	0	1.97482	2.55148	ITGB2;CMTM6
cell projection membrane (GO:0031253)	2-92	0.278907	0.462014	0	0	1.95278	2.49345	CYBRD1;ANTXR1
membrane raft (GO:0045121)	3-163	0.280188	0.462014	0	0	1.64916	2.09822	APP;ITGB2;TNFRSF10A
rough endoplasmic reticulum (GO:0005791)	1-22	0.28093	0.462014	0	0	3.13429	3.97944	SEC62
secretory vesicle (GO:0099503)	1-22	0.28093	0.462014	0	0	3.13429	3.97944	SYT11
trans-Golgi network (GO:0005802)	4-239	0.285265	0.462014	0	0	1.4981	1.87913	APP;NSG2;SYT11;RHOBTB3
integral component of plasma membrane (GO:0005887)	19-1454	0.28813	0.462014	0	0	1.17302	1.45964	BCAP31;APP;CD63;SDC4;GOLM1;PCDHGC3;SLC2A1;CLDN1;SLC5A3;EFNB2;ATRN;C7;SYPL1;SLCO2B1;ADGRG6;CLPTM1;TMBIM6;PROM1;CD320
cyclin-dependent protein kinase holoenzyme complex (GO:0000307)	1-22	0.289068	0.462014	0	0	3.02605	3.75562	CDKN1A
exocytic vesicle (GO:0070382)	1-22	0.289068	0.462014	0	0	3.02605	3.75562	SYT11
catenin complex (GO:0016342)	1-22	0.297113	0.466892	0	0	2.92504	3.54995	DCHS1
voltage-gated calcium channel complex (GO:0005891)	1-22	0.297113	0.466892	0	0	2.92504	3.54995	CACHD1
early endosome membrane (GO:0031901)	2-97	0.299814	0.46721	0	0	1.84953	2.22793	IFITM3;CMTM6
heterotrimeric G-protein complex (GO:0005834)	1-33	0.312933	0.483624	0	0	2.74194	3.18549	GNG5
aggresome (GO:0016235)	1-35	0.328399	0.503366	0	0	2.58039	2.87333	SQSTM1
vesicle coat (GO:0030120)	1-36	0.336002	0.510832	0	0	2.50654	2.73373	SAR1A
brush border membrane (GO:0031526)	1-37	0.343518	0.513903	0	0	2.43679	2.60375	CYBRD1
serine/threonine protein kinase complex (GO:1902554)	1-37	0.343518	0.513903	0	0	2.43679	2.60375	CDKN1A
endocytic vesicle (GO:0030139)	3-189	0.360362	0.534824	0	0	1.41675	1.446	SCARB1;MYO1E;SYT11
dendrite (GO:0030425)	4-270	0.364312	0.536428	0	0	1.32141	1.33429	NSG2;SYT11;MAP6;PRSS12
exocytic vesicle membrane (GO:0099501)	1-41	0.372747	0.538787	0	0	2.19267	2.16384	SYPL1
synaptic vesicle membrane (GO:0030672)	1-41	0.372747	0.538787	0	0	2.19267	2.16384	SYPL1
secretory granule membrane (GO:0030667)	4-274	0.374558	0.538787	0	0	1.30157	1.27815	CD63;ABCA3;ITGB2;CMTM6
cortical actin cytoskeleton (GO:0030864)	1-42	0.37985	0.542228	0	0	2.13908	2.07058	SLC2A1
calcium channel complex (GO:0034704)	1-45	0.400681	0.563363	0	0	1.99293	1.82272	CACHD1
vacuolar membrane (GO:0005774)	1-45	0.400681	0.563363	0	0	1.99293	1.82272	CTNS
mitochondrial outer membrane (GO:0005741)	2-126	0.417629	0.582811	0	0	1.41489	1.23543	COASY;MCL1
mitochondrial envelope (GO:0005740)	2-127	0.421531	0.582943	0	0	1.4035	1.21243	PRELID1;TMBIM6
U2-type precatalytic spliceosome (GO:0071005)	1-50	0.433862	0.582943	0	0	1.78912	1.49396	MAGOHB
adherens junction (GO:0005912)	2-132	0.440833	0.582943	0	0	1.34918	1.1051	MYO1E;DCHS1
asymmetric synapse (GO:0032279)	2-133	0.444651	0.582943	0	0	1.33881	1.08506	SYT11;RPL7
precatalytic spliceosome (GO:0071011)	1-52	0.446616	0.582943	0	0	1.71878	1.38543	MAGOHB
sarcolemma (GO:0042383)	1-52	0.446616	0.582943	0	0	1.71878	1.38543	SLC2A1
sperm flagellum (GO:0036126)	1-52	0.446616	0.582943	0	0	1.71878	1.38543	ABHD2
Golgi cisterna (GO:0031985)	1-53	0.452886	0.582943	0	0	1.68564	1.33522	GOLGA5
condensed chromosome (GO:0000793)	1-54	0.459084	0.582943	0	0	1.65375	1.28748	NIFK
ER to Golgi transport vesicle membrane (GO:0012507)	1-54	0.459084	0.582943	0	0	1.65375	1.28748	SAR1A
postsynaptic density (GO:0014069)	2-138	0.463522	0.582943	0	0	1.28926	0.991313	SYT11;RPL7
tertiary granule lumen (GO:1904724)	1-55	0.465213	0.582943	0	0	1.62305	1.24205	FTH1
integral component of Golgi membrane (GO:0030173)	1-55	0.465213	0.582943	0	0	1.62305	1.24205	ENTPD4
extracellular membrane-bounded organelle (GO:0065010)	1-56	0.471273	0.582943	0	0	1.59345	1.19878	ITGB2
9+2 motile cilium (GO:0097729)	1-57	0.477264	0.582943	0	0	1.56492	1.15755	ABHD2
organelle outer membrane (GO:0031968)	2-142	0.478347	0.582943	0	0	1.25217	0.923374	COASY;MCL1
actin cytoskeleton (GO:0015629)	4-316	0.480212	0.582943	0	0	1.12393	0.824434	MYO1E;MARCKS;SLC2A1;RHOQ
mitochondrial intermembrane space (GO:0005758)	1-58	0.483188	0.582943	0	0	1.53739	1.11822	PRELID1
cortical cytoskeleton (GO:0030863)	1-58	0.483188	0.582943	0	0	1.53739	1.11822	SLC2A1
recycling endosome membrane (GO:0055038)	1-58	0.483188	0.582943	0	0	1.53739	1.11822	CMTM6
filopodium (GO:0030175)	1-58	0.483188	0.582943	0	0	1.53739	1.11822	ANTXR1
caveola (GO:0005901)	1-60	0.494836	0.589391	0	0	1.48512	1.04483	SCARB1
intrinsic component of Golgi membrane (GO:0031228)	1-60	0.494836	0.589391	0	0	1.48512	1.04483	ENTPD4
ficolin-1-rich granule membrane (GO:0101003)	1-61	0.500561	0.592437	0	0	1.4603	1.01056	ITGB2
motile cilium (GO:0031514)	1-68	0.538871	0.633292	0	0	1.30726	0.808254	DAAM1
specific granule (GO:0042581)	2-160	0.541854	0.633292	0	0	1.1085	0.679242	ITGB2;CMTM6
tertiary granule (GO:0070820)	2-164	0.555224	0.644888	0	0	1.08091	0.635988	FTH1;ITGB2
actin filament (GO:0005884)	1-72	0.559434	0.645766	0	0	1.23336	0.716376	RHOQ
tertiary granule membrane (GO:0070821)	1-73	0.56443	0.647536	0	0	1.21617	0.695577	ITGB2
bicellular tight junction (GO:0005923)	1-78	0.588578	0.671123	0	0	1.13691	0.602615	CLDN1
cell-cell junction (GO:0005911)	3-271	0.593527	0.672664	0	0	0.979151	0.510797	MYO1E;DCHS1;CLDN1
clathrin-coated vesicle (GO:0030136)	1-80	0.59786	0.673493	0	0	1.10802	0.569962	MYO1E
intermediate filament cytoskeleton (GO:0045111)	1-84	0.615803	0.682179	0	0	1.0544	0.511205	CTNS
ficolin-1-rich granule (GO:0101002)	2-184	0.61789	0.682179	0	0	0.961146	0.462739	FTH1;ITGB2
clathrin-coated endocytic vesicle (GO:0045334)	1-85	0.620163	0.682179	0	0	1.0418	0.497744	MYO1E
tight junction (GO:0070160)	1-85	0.620163	0.682179	0	0	1.0418	0.497744	CLDN1
U2-type spliceosomal complex (GO:0005684)	1-89	0.637114	0.696727	0	0	0.994242	0.448211	MAGOHB
azurophil granule lumen (GO:0035578)	1-90	0.641233	0.697155	0	0	0.983021	0.436817	FTL
apical junction complex (GO:0043296)	1-98	0.672552	0.726978	0	0	0.901581	0.357635	CLDN1
secretory granule lumen (GO:0034774)	3-316	0.695885	0.747876	0	0	0.836445	0.303271	APP;PROS1;FTL
cytoplasmic vesicle lumen (GO:0060205)	1-115	0.730357	0.780438	0	0	0.766472	0.240843	SERPINI1
cilium (GO:0005929)	2-237	0.75092	0.794728	0	0	0.742363	0.212654	DAAM1;PROM1
ficolin-1-rich granule lumen (GO:1904813)	1-123	0.753924	0.794728	0	0	0.71592	0.202222	FTH1
neuron projection (GO:0043005)	5-556	0.756479	0.794728	0	0	0.789309	0.220281	APP;NSG2;SYT11;MAP6;PRSS12
intracellular membrane-bounded organelle (GO:0043231)	54-5192	0.783546	0.818563	0	0	0.894321	0.218147	TOP2A;ARHGAP11A;JPT1;SCARB1;CDKN1A;CRTC3;DGKD;TECR;LIPA;RPL7;MT2A;GOLGA5;FTH1;CREB3L2;JAK1;RPS9;TET2;RPL13A;PSMA6;POR;TRAF4;ESRP2;FAR1;TMBIM6;PRR11;CRYAB;SQSTM1;VGLL4;CD63;CEBPG;RHOBTB3;PTTG1IP;HSPA13;UBE2J1;PCNP;LDHA;FAM241B;HMOX1;MAP6;PLAGL2;MCL1;JUN;ABCA3;CMTM6;CTNS;MAGOHB;SQLE;H1-4;NFIB;ZFP62;MFAP3;ID1;SEMG1;ITM2B
polymeric cytoskeletal fiber (GO:0099513)	2-256	0.787922	0.818563	0	0	0.686164	0.163552	MAP6;RHOQ
microtubule (GO:0005874)	1-182	0.874791	0.903789	0	0	0.481105	0.0643578	MAP6
mitochondrial membrane (GO:0031966)	3-469	0.90244	0.925469	0	0	0.557401	0.0572191	TMBIM6;COASY;MCL1
mitochondrial matrix (GO:0005759)	2-348	0.906576	0.925469	0	0	0.501342	0.0491717	ACSM6;COASY
cytoskeleton (GO:0005856)	4-600	0.910622	0.925469	0	0	0.579781	0.0542833	MYO1E;MARCKS;RHOBTB3;CTNS
microtubule cytoskeleton (GO:0015630)	1-331	0.977473	0.985017	0	0	0.261872	0.00596652	MAP6
organelle inner membrane (GO:0019866)	1-346	0.98106	0.985017	0	0	0.250293	0.00478614	ARL6IP6
nucleus (GO:0005634)	38-4484	0.985017	0.985017	0	0	0.696854	0.0105201	TOP2A;ARHGAP11A;JPT1;CDKN1A;CRTC3;DGKD;TECR;CEBPG;PTTG1IP;RPL7;UBE2J1;PCNP;MT2A;LDHA;FTH1;CREB3L2;HMOX1;PLAGL2;JAK1;MCL1;JUN;RPS9;TET2;RPL13A;MAGOHB;H1-4;PSMA6;TRAF4;NFIB;ZFP62;ESRP2;MFAP3;ID1;SEMG1;TMBIM6;PRR11;CRYAB;VGLL4

## Sheet: KEGG Down_THC
	Term	Overlap	P-value	Adjusted P-value	Old P-value	Old Adjusted P-value	Odds Ratio	Combined Score	Genes
	Cell adhesion molecules	4-148	0.00851702	0.209505	0	0	5.27457	25.137	CNTN1	CNTN2	CD99L2	LRRC4B
	Peroxisome	3-82	0.00995778	0.209505	0	0	7.16564	33.0293	PEX19	MPV17L	FAR1
	Non-alcoholic fatty liver disease	4-155	0.00997641	0.209505	0	0	5.02827	23.1679	NDUFAB1	COX7A2	ADIPOR1	COX7C
	Sphingolipid metabolism	2-49	0.0288139	0.381594	0	0	7.96668	28.257	ASAH2	CERK
	Oxidative phosphorylation	3-133	0.0354199	0.381594	0	0	4.3433	14.5087	NDUFAB1	COX7A2	COX7C
	Thermogenesis	4-232	0.037138	0.381594	0	0	3.31714	10.9237	NDUFAB1	COX7A2	COX7C	COA5
	Sulfur relay system	1-22	0.0423993	0.381594	0	0	26.5487	83.9105	URM1
	Arrhythmogenic right ventricular cardiomyopathy	2-77	0.0650897	0.512581	0	0	4.98541	13.6201	LAMA1	DSC2
	Cardiac muscle contraction	2-87	0.0804206	0.562944	0	0	4.39667	11.0817	COX7A2	COX7C
	Diabetic cardiomyopathy	3-203	0.0973927	0.612493	0	0	2.81314	6.55182	NDUFAB1	COX7A2	COX7C
	Protein digestion and absorption	2-103	0.106943	0.612493	0	0	3.69718	8.26488	SLC16A10	SLC1A5
	Amyotrophic lateral sclerosis	4-364	0.13452	0.630097	0	0	2.08675	4.18611	NDUFAB1	COX7A2	COX7C	TOMM40L
	AMPK signaling pathway	2-120	0.137254	0.630097	0	0	3.16182	6.27912	CRTC2	ADIPOR1
	Parkinson disease	3-249	0.151876	0.630097	0	0	2.28177	4.30042	NDUFAB1	COX7A2	COX7C
	African trypanosomiasis	1-37	0.181696	0.630097	0	0	5.15472	8.79096	HBA1
	Prion disease	3-273	0.183432	0.630097	0	0	2.0764	3.5214	NDUFAB1	COX7A2	COX7C
	Glycine, serine and threonine metabolism	1-40	0.194906	0.630097	0	0	4.75749	7.77961	ALAS1
	Type I diabetes mellitus	1-43	0.207905	0.630097	0	0	4.417	6.93766	ICA1
	Porphyrin and chlorophyll metabolism	1-43	0.207905	0.630097	0	0	4.417	6.93766	ALAS1
	Proteasome	1-46	0.220696	0.630097	0	0	4.12191	6.22808	POMP
	Huntington disease	3-306	0.229297	0.630097	0	0	1.84715	2.72036	NDUFAB1	COX7A2	COX7C
	Arginine and proline metabolism	1-50	0.237432	0.630097	0	0	3.78467	5.44187	CKM
	Malaria	1-50	0.237432	0.630097	0	0	3.78467	5.44187	HBA1
	Pathways of neurodegeneration	4-475	0.254982	0.630097	0	0	1.58591	2.16724	NDUFAB1	COX7A2	COX7C	TOMM40L
	Viral myocarditis	1-60	0.277732	0.630097	0	0	3.14161	4.02472	LAMA1
	Neuroactive ligand-receptor interaction	3-341	0.279983	0.630097	0	0	1.65292	2.10421	GAL	NPW	ADM
	Mitophagy	1-68	0.308446	0.630097	0	0	2.76538	3.25266	FUNDC1
	Adipocytokine signaling pathway	1-69	0.312193	0.630097	0	0	2.72457	3.17177	ADIPOR1
	Central carbon metabolism in cancer	1-70	0.31592	0.630097	0	0	2.68495	3.09378	SLC1A5
	Alzheimer disease	3-369	0.321273	0.630097	0	0	1.52428	1.73076	NDUFAB1	COX7A2	COX7C
	Human T-cell leukemia virus 1 infection	2-219	0.331605	0.630097	0	0	1.71072	1.88831	CRTC2	CRTC1
	Pertussis	1-76	0.337866	0.630097	0	0	2.46941	2.67957	C4BPA
	Synaptic vesicle cycle	1-78	0.345025	0.630097	0	0	2.40502	2.55928	SLC6A2
	Complement and coagulation cascades	1-85	0.369483	0.630097	0	0	2.20383	2.19424	C4BPA
	ECM-receptor interaction	1-88	0.379686	0.630097	0	0	2.12751	2.06031	LAMA1
	Hypertrophic cardiomyopathy	1-90	0.386397	0.630097	0	0	2.07949	1.97737	LAMA1
	Small cell lung cancer	1-92	0.393036	0.630097	0	0	2.03358	1.89907	LAMA1
	Dilated cardiomyopathy	1-96	0.406101	0.630097	0	0	1.94757	1.75506	LAMA1
	Progesterone-mediated oocyte maturation	1-100	0.418887	0.630097	0	0	1.8685	1.62588	CDC25B
	Amoebiasis	1-102	0.425178	0.630097	0	0	1.83131	1.56623	LAMA1
	Longevity regulating pathway	1-102	0.425178	0.630097	0	0	1.83131	1.56623	ADIPOR1
	Glucagon signaling pathway	1-107	0.440611	0.630097	0	0	1.74449	1.42977	CRTC2
	Insulin resistance	1-108	0.443648	0.630097	0	0	1.7281	1.40447	CRTC2
	Toxoplasmosis	1-112	0.455633	0.630097	0	0	1.66549	1.30919	LAMA1
	Leukocyte transendothelial migration	1-114	0.461529	0.630097	0	0	1.63584	1.26485	CD99L2
	MAPK signaling pathway	2-294	0.472973	0.630097	0	0	1.26648	0.948234	CDC25B	MAP3K12
	Sphingolipid signaling pathway	1-119	0.475995	0.630097	0	0	1.56613	1.16262	ASAH2
	Thyroid hormone signaling pathway	1-121	0.481673	0.630097	0	0	1.53988	1.12486	SLC16A10
	Cell cycle	1-124	0.490075	0.630097	0	0	1.50209	1.07129	CDC25B
	Lysosome	1-128	0.501069	0.631347	0	0	1.45449	1.00507	LAPTM4A
	Vascular smooth muscle contraction	1-133	0.514482	0.635536	0	0	1.39904	0.929794	ADM
	Spinocerebellar ataxia	1-143	0.540244	0.654527	0	0	1.29986	0.800365	VLDLR
	Retrograde endocannabinoid signaling	1-148	0.552613	0.65688	0	0	1.25532	0.744529	NDUFAB1
	PI3K-Akt signaling pathway	2-354	0.572528	0.660206	0	0	1.04738	0.584119	CRTC2	LAMA1
	Ribosome	1-158	0.57637	0.660206	0	0	1.17477	0.647306	MRPL35
	Pathogenic Escherichia coli infection	1-197	0.657662	0.735077	0	0	0.939157	0.393568	BRK1
	Focal adhesion	1-201	0.665069	0.735077	0	0	0.920187	0.375311	LAMA1
	Lipid and atherosclerosis	1-215	0.689768	0.741927	0	0	0.859376	0.319173	VLDLR
	Regulation of actin cytoskeleton	1-218	0.69482	0.741927	0	0	0.847366	0.308528	BRK1
	Salmonella infection	1-249	0.742489	0.779613	0	0	0.740277	0.220416	BRK1
	MicroRNAs in cancer	1-310	0.815788	0.842535	0	0	0.592294	0.120591	CDC25B
	Human papillomavirus infection	1-331	0.835892	0.849374	0	0	0.554007	0.0993093	LAMA1
	Pathways in cancer	1-531	0.945743	0.945743	0	0	0.341421	0.0190459	LAMA1

## Sheet: Down BP_THC
Term	Overlap	P-value	Adjusted P-value	Old P-value	Old Adjusted P-value	Odds Ratio	Combined Score	Genes
protein insertion into mitochondrial inner membrane (GO:0045039)	2-22	0.0018406	0.280947	0	0	37.5132	236.246	TIMM8B	TIMM8A
protein targeting to mitochondrion (GO:0006626)	3-55	0.00327621	0.280947	0	0	10.9011	62.3659	TIMM8B	TIMM8A	TOMM40L
positive regulation of CREB transcription factor activity (GO:0032793)	2-22	0.00417764	0.280947	0	0	23.4387	128.397	CRTC2	CRTC1
positive regulation of heart contraction (GO:0045823)	2-22	0.00515157	0.280947	0	0	20.8323	109.754	CHGA	ADM
fatty acid biosynthetic process (GO:0006633)	3-71	0.00670666	0.280947	0	0	8.32941	41.6858	ASAH2	NDUFAB1	LIAS
regulation of actin filament polymerization (GO:0030833)	3-73	0.00724173	0.280947	0	0	8.09061	39.8697	MTPN	PLEKHG2	CDC42EP4
regulation of cell size (GO:0008361)	2-22	0.00737897	0.280947	0	0	17.0412	83.6571	MTPN	PRR16
protein insertion into mitochondrial membrane (GO:0051204)	2-22	0.00737897	0.280947	0	0	17.0412	83.6571	TIMM8B	TIMM8A
regulation of cardiac muscle cell action potential (GO:0098901)	2-22	0.00799254	0.280947	0	0	16.2994	78.714	RANGRF	DSC2
regulation of cardiac muscle cell contraction (GO:0086004)	2-22	0.00928594	0.280947	0	0	14.994	70.1606	RANGRF	DSC2
camera-type eye development (GO:0043010)	2-22	0.00928594	0.280947	0	0	14.994	70.1606	TENM3	LAMA1
positive regulation of plasma membrane bounded cell projection assembly (GO:0120034)	3-83	0.0102913	0.280947	0	0	7.07571	32.3817	MIEN1	CDC42EP4	BRK1
regulation of actin polymerization or depolymerization (GO:0008064)	2-29	0.010666	0.280947	0	0	13.8819	63.0334	PLEKHG2	BRK1
negative regulation of epithelial to mesenchymal transition (GO:0010719)	2-29	0.010666	0.280947	0	0	13.8819	63.0334	ADIPOR1	VASN
sensory perception of mechanical stimulus (GO:0050954)	3-88	0.0120556	0.280947	0	0	6.65782	29.4157	TIMM8B	LHFPL4	TPRN
sensory perception of sound (GO:0007605)	3-91	0.0131925	0.280947	0	0	6.42987	27.8292	TIMM8B	LHFPL4	TPRN
regulation of translation (GO:0006417)	4-178	0.0158813	0.280947	0	0	4.35853	18.0557	MTPN	MTG2	PRR16	PAIP2
organic acid transport (GO:0015849)	3-100	0.0169601	0.280947	0	0	5.83063	23.7709	SLC10A4	SLC16A10	SLC1A5
posttranscriptional regulation of gene expression (GO:0010608)	2-46	0.0256248	0.280947	0	0	8.51115	31.1865	MTPN	ZC3H10
regulation of synapse assembly (GO:0051963)	2-47	0.0266708	0.280947	0	0	8.32159	30.159	LHFPL4	LRRC4B
positive regulation of cardiac muscle contraction (GO:0060452)	1-22	0.0267124	0.280947	0	0	46.4673	168.334	CHGA
regulation of system process (GO:0044057)	1-22	0.0267124	0.280947	0	0	46.4673	168.334	MTG2
reelin-mediated signaling pathway (GO:0038026)	1-22	0.0267124	0.280947	0	0	46.4673	168.334	VLDLR
regulation of barbed-end actin filament capping (GO:2000812)	1-22	0.0267124	0.280947	0	0	46.4673	168.334	MTPN
negative regulation of hydrogen peroxide metabolic process (GO:0010727)	1-22	0.0267124	0.280947	0	0	46.4673	168.334	MPV17L
hemoglobin metabolic process (GO:0020027)	1-22	0.0267124	0.280947	0	0	46.4673	168.334	ALAS1
regulation of cellular response to osmotic stress (GO:0106049)	1-22	0.0267124	0.280947	0	0	46.4673	168.334	SLC25A23
positive regulation of mitochondrial depolarization (GO:0051901)	1-22	0.0267124	0.280947	0	0	46.4673	168.334	MLLT11
L-aspartate transmembrane transport (GO:0070778)	1-22	0.0267124	0.280947	0	0	46.4673	168.334	SLC1A5
regulation of homophilic cell adhesion (GO:1903385)	1-22	0.0267124	0.280947	0	0	46.4673	168.334	TENM3
regulation of hydrogen peroxide biosynthetic process (GO:0010728)	1-22	0.0267124	0.280947	0	0	46.4673	168.334	MPV17L
tRNA thio-modification (GO:0034227)	1-22	0.0267124	0.280947	0	0	46.4673	168.334	URM1
regulation of postsynaptic density organization (GO:1905874)	1-22	0.0267124	0.280947	0	0	46.4673	168.334	LRRC4B
protein lipoylation (GO:0009249)	1-22	0.0267124	0.280947	0	0	46.4673	168.334	NDUFAB1
protein localization to axon (GO:0099612)	1-22	0.0267124	0.280947	0	0	46.4673	168.334	CNTN2
establishment of protein localization to mitochondrion (GO:0072655)	2-48	0.0277339	0.280947	0	0	8.14028	29.1837	TIMM8B	TOMM40L
inner mitochondrial membrane organization (GO:0007007)	2-49	0.0288139	0.280947	0	0	7.96668	28.257	TIMM8B	TIMM8A
amino acid transport (GO:0006865)	2-50	0.0299105	0.280947	0	0	7.80031	27.3756	SLC16A10	SLC1A5
synapse organization (GO:0050808)	3-126	0.0308946	0.280947	0	0	4.5921	15.9675	ZC4H2	CNTN2	LRRC4B
regulation of relaxation of cardiac muscle (GO:1901897)	1-22	0.0319695	0.280947	0	0	37.172	127.982	CHGA
adiponectin-activated signaling pathway (GO:0033211)	1-22	0.0319695	0.280947	0	0	37.172	127.982	ADIPOR1
amylin receptor signaling pathway (GO:0097647)	1-22	0.0319695	0.280947	0	0	37.172	127.982	ADM
anterior/posterior axis specification, embryo (GO:0008595)	1-22	0.0319695	0.280947	0	0	37.172	127.982	HOXD8
aromatic amino acid transport (GO:0015801)	1-22	0.0319695	0.280947	0	0	37.172	127.982	SLC16A10
glycerol ether biosynthetic process (GO:0046504)	1-22	0.0319695	0.280947	0	0	37.172	127.982	FAR1
bundle of His cell-Purkinje myocyte adhesion involved in cell communication (GO:0086073)	1-22	0.0319695	0.280947	0	0	37.172	127.982	DSC2
cellular lipid biosynthetic process (GO:0097384)	1-22	0.0319695	0.280947	0	0	37.172	127.982	FAR1
regulation of excitatory synapse assembly (GO:1904889)	1-22	0.0319695	0.280947	0	0	37.172	127.982	LRRC4B
spinal cord motor neuron differentiation (GO:0021522)	1-22	0.0319695	0.280947	0	0	37.172	127.982	ZC4H2
neurotransmitter-gated ion channel clustering (GO:0072578)	1-22	0.0319695	0.280947	0	0	37.172	127.982	LHFPL4
norepinephrine transport (GO:0015874)	1-22	0.0319695	0.280947	0	0	37.172	127.982	SLC6A2
regulation of macromolecule biosynthetic process (GO:0010556)	1-22	0.0319695	0.280947	0	0	37.172	127.982	MTPN
tripartite regional subdivision (GO:0007351)	1-22	0.0319695	0.280947	0	0	37.172	127.982	HOXD8
mRNA 3'-splice site recognition (GO:0000389)	1-22	0.0319695	0.280947	0	0	37.172	127.982	SF1
G2/M transition of mitotic cell cycle (GO:0000086)	3-130	0.0334407	0.280947	0	0	4.44657	15.1094	SSNA1	BACH1	CDC25B
ceramide metabolic process (GO:0006672)	2-55	0.0356358	0.280947	0	0	7.06266	23.5497	ASAH2	CERK
blood vessel morphogenesis (GO:0048514)	2-56	0.036828	0.280947	0	0	6.93152	22.8844	LAMA1	ADM
Rho protein signal transduction (GO:0007266)	2-56	0.036828	0.280947	0	0	6.93152	22.8844	CDC42EP4	ARHGAP6
regulation of respiratory system process (GO:0044065)	1-22	0.0371984	0.280947	0	0	30.9751	101.954	MTG2
positive regulation of B cell receptor signaling pathway (GO:0050861)	1-22	0.0371984	0.280947	0	0	30.9751	101.954	SLC39A10
negative regulation of catecholamine secretion (GO:0033604)	1-22	0.0371984	0.280947	0	0	30.9751	101.954	CHGA
G protein-coupled receptor internalization (GO:0002031)	1-22	0.0371984	0.280947	0	0	30.9751	101.954	ADM
glutamine transport (GO:0006868)	1-22	0.0371984	0.280947	0	0	30.9751	101.954	SLC1A5
calcitonin family receptor signaling pathway (GO:0097646)	1-22	0.0371984	0.280947	0	0	30.9751	101.954	ADM
negative regulation of mitochondrial outer membrane permeabilization involved in apoptotic signaling pathway (GO:1901029)	1-22	0.0371984	0.280947	0	0	30.9751	101.954	MPV17L
cardiac muscle cell-cardiac muscle cell adhesion (GO:0086042)	1-22	0.0371984	0.280947	0	0	30.9751	101.954	DSC2
catecholamine uptake (GO:0090493)	1-22	0.0371984	0.280947	0	0	30.9751	101.954	SLC6A2
positive regulation of membrane depolarization (GO:1904181)	1-22	0.0371984	0.280947	0	0	30.9751	101.954	MLLT11
synaptic transmission, dopaminergic (GO:0001963)	1-22	0.0371984	0.280947	0	0	30.9751	101.954	SLC6A2
thyroid hormone transport (GO:0070327)	1-22	0.0371984	0.280947	0	0	30.9751	101.954	SLC16A10
positive regulation of striated muscle contraction (GO:0045989)	1-22	0.0371984	0.280947	0	0	30.9751	101.954	CHGA
creatine metabolic process (GO:0006600)	1-22	0.0371984	0.280947	0	0	30.9751	101.954	CKM
regulation of muscle organ development (GO:0048634)	1-22	0.0371984	0.280947	0	0	30.9751	101.954	MTPN
oxygen transport (GO:0015671)	1-22	0.0371984	0.280947	0	0	30.9751	101.954	HBA1
vascular wound healing (GO:0061042)	1-22	0.0371984	0.280947	0	0	30.9751	101.954	MCAM
zinc ion import across plasma membrane (GO:0071578)	1-22	0.0371984	0.280947	0	0	30.9751	101.954	SLC39A10
Ras protein signal transduction (GO:0007265)	3-142	0.0417124	0.280947	0	0	4.06023	12.8992	CDC42EP4	BRK1	ARHGAP6
homophilic cell adhesion via plasma membrane adhesion molecules (GO:0007156)	2-60	0.0417468	0.280947	0	0	6.45218	20.493	TENM3	CNTN2
positive regulation of Arp2/3 complex-mediated actin nucleation (GO:2000601)	1-22	0.0423993	0.280947	0	0	26.5487	83.9105	BRK1
establishment of protein localization to peroxisome (GO:0072663)	1-22	0.0423993	0.280947	0	0	26.5487	83.9105	PEX19
regulation of striated muscle tissue development (GO:0016202)	1-22	0.0423993	0.280947	0	0	26.5487	83.9105	MTPN
negative regulation of complement activation, classical pathway (GO:0045959)	1-22	0.0423993	0.280947	0	0	26.5487	83.9105	C4BPA
regulation of actin filament length (GO:0030832)	1-22	0.0423993	0.280947	0	0	26.5487	83.9105	BRK1
regulation of cardiac muscle cell action potential involved in regulation of contraction (GO:0098909)	1-22	0.0423993	0.280947	0	0	26.5487	83.9105	RANGRF
mast cell activation involved in immune response (GO:0002279)	1-22	0.0423993	0.280947	0	0	26.5487	83.9105	CHGA
mast cell degranulation (GO:0043303)	1-22	0.0423993	0.280947	0	0	26.5487	83.9105	CHGA
positive regulation of steroid biosynthetic process (GO:0010893)	1-22	0.0423993	0.280947	0	0	26.5487	83.9105	ADM
regulation of mitochondrial gene expression (GO:0062125)	1-22	0.0423993	0.280947	0	0	26.5487	83.9105	MTG2
monoamine transport (GO:0015844)	1-22	0.0423993	0.280947	0	0	26.5487	83.9105	SLC6A2
dopamine uptake (GO:0090494)	1-22	0.0423993	0.280947	0	0	26.5487	83.9105	SLC6A2
receptor-mediated endocytosis (GO:0006898)	3-143	0.0424442	0.280947	0	0	4.03102	12.7363	ADM	VLDLR	HBA1
nitrogen compound transport (GO:0071705)	3-143	0.0424442	0.280947	0	0	4.03102	12.7363	SLC16A10	SLC1A5	SLC6A2
regulation of actin filament organization (GO:0110053)	1-22	0.0475724	0.280947	0	0	23.229	70.7439	BRK1
glomerular filtration (GO:0003094)	1-22	0.0475724	0.280947	0	0	23.229	70.7439	MCAM
glycerolipid biosynthetic process (GO:0045017)	1-22	0.0475724	0.280947	0	0	23.229	70.7439	FAR1
bundle of His cell to Purkinje myocyte communication (GO:0086069)	1-22	0.0475724	0.280947	0	0	23.229	70.7439	DSC2
histone phosphorylation (GO:0016572)	1-22	0.0475724	0.280947	0	0	23.229	70.7439	MAP3K12
regulation of complement activation, classical pathway (GO:0030450)	1-22	0.0475724	0.280947	0	0	23.229	70.7439	C4BPA
hormone transport (GO:0009914)	1-22	0.0475724	0.280947	0	0	23.229	70.7439	SLC16A10
positive regulation of megakaryocyte differentiation (GO:0045654)	1-22	0.0475724	0.280947	0	0	23.229	70.7439	MTURN
positive regulation of mitochondrial calcium ion concentration (GO:0051561)	1-22	0.0475724	0.280947	0	0	23.229	70.7439	SLC25A23
neuronal ion channel clustering (GO:0045161)	1-22	0.0475724	0.280947	0	0	23.229	70.7439	CNTN2
mast cell mediated immunity (GO:0002448)	1-22	0.0475724	0.280947	0	0	23.229	70.7439	CHGA
mitochondrial respirasome assembly (GO:0097250)	1-22	0.0475724	0.280947	0	0	23.229	70.7439	COX7A2
peroxisomal transport (GO:0043574)	1-22	0.0475724	0.280947	0	0	23.229	70.7439	PEX19
peroxisome fission (GO:0016559)	1-22	0.0475724	0.280947	0	0	23.229	70.7439	PEX19
ether lipid biosynthetic process (GO:0008611)	1-22	0.0527179	0.282853	0	0	20.6469	60.7598	FAR1
regulation of urine volume (GO:0035809)	1-22	0.0527179	0.282853	0	0	20.6469	60.7598	ADM
negative regulation of humoral immune response mediated by circulating immunoglobulin (GO:0002924)	1-22	0.0527179	0.282853	0	0	20.6469	60.7598	C4BPA
renal filtration (GO:0097205)	1-22	0.0527179	0.282853	0	0	20.6469	60.7598	MCAM
calcium import into the mitochondrion (GO:0036444)	1-22	0.0527179	0.282853	0	0	20.6469	60.7598	SLC25A23
low-density lipoprotein particle receptor catabolic process (GO:0032802)	1-22	0.0527179	0.282853	0	0	20.6469	60.7598	VLDLR
low-density lipoprotein receptor particle metabolic process (GO:0032799)	1-22	0.0527179	0.282853	0	0	20.6469	60.7598	VLDLR
regulation of microtubule nucleation (GO:0010968)	1-22	0.0527179	0.282853	0	0	20.6469	60.7598	RANGRF
aerobic electron transport chain (GO:0019646)	2-70	0.0550295	0.282853	0	0	5.50055	15.951	NDUFAB1	COX7C
carbohydrate homeostasis (GO:0033500)	2-70	0.0550295	0.282853	0	0	5.50055	15.951	CRTC2	ADIPOR1
mitochondrial ATP synthesis coupled electron transport (GO:0042775)	2-71	0.0564302	0.282853	0	0	5.42056	15.5828	NDUFAB1	COX7C
positive regulation of actin nucleation (GO:0051127)	1-22	0.0578357	0.282853	0	0	18.5813	52.9595	BRK1
erythrocyte development (GO:0048821)	1-22	0.0578357	0.282853	0	0	18.5813	52.9595	ALAS1
angiogenesis involved in wound healing (GO:0060055)	1-22	0.0578357	0.282853	0	0	18.5813	52.9595	MCAM
positive regulation of dendrite development (GO:1900006)	1-22	0.0578357	0.282853	0	0	18.5813	52.9595	VLDLR
camera-type eye morphogenesis (GO:0048593)	1-22	0.0578357	0.282853	0	0	18.5813	52.9595	TENM3
cell differentiation in spinal cord (GO:0021515)	1-22	0.0578357	0.282853	0	0	18.5813	52.9595	ZC4H2
negative regulation of receptor signaling pathway via STAT (GO:1904893)	1-22	0.0578357	0.282853	0	0	18.5813	52.9595	ADIPOR1
regulation of mitochondrial depolarization (GO:0051900)	1-22	0.0578357	0.282853	0	0	18.5813	52.9595	MLLT11
desensitization of G protein-coupled receptor signaling pathway (GO:0002029)	1-22	0.0578357	0.282853	0	0	18.5813	52.9595	ADM
presynaptic membrane organization (GO:0097090)	1-22	0.0578357	0.282853	0	0	18.5813	52.9595	CNTN2
proteasome assembly (GO:0043248)	1-22	0.0578357	0.282853	0	0	18.5813	52.9595	POMP
regulation of pseudopodium assembly (GO:0031272)	1-22	0.0629262	0.285448	0	0	16.8912	46.7177	CDC42EP4
negative regulation of complement activation (GO:0045916)	1-22	0.0629262	0.285448	0	0	16.8912	46.7177	C4BPA
regulation of actin filament depolymerization (GO:0030834)	1-22	0.0629262	0.285448	0	0	16.8912	46.7177	MTPN
gas transport (GO:0015669)	1-22	0.0629262	0.285448	0	0	16.8912	46.7177	HBA1
negative regulation of gene silencing by miRNA (GO:0060965)	1-22	0.0629262	0.285448	0	0	16.8912	46.7177	ZC3H10
regulation of ventricular cardiac muscle cell action potential (GO:0098911)	1-22	0.0629262	0.285448	0	0	16.8912	46.7177	DSC2
negative regulation of production of miRNAs involved in gene silencing by miRNA (GO:1903799)	1-22	0.0629262	0.285448	0	0	16.8912	46.7177	ZC3H10
intrinsic apoptotic signaling pathway in response to oxidative stress (GO:0008631)	1-22	0.0629262	0.285448	0	0	16.8912	46.7177	GSKIP
sphingoid metabolic process (GO:0046519)	1-22	0.0629262	0.285448	0	0	16.8912	46.7177	ASAH2
positive regulation of pseudopodium assembly (GO:0031274)	1-22	0.0629262	0.285448	0	0	16.8912	46.7177	CDC42EP4
regulation of epithelial to mesenchymal transition (GO:0010717)	2-76	0.0636169	0.285983	0	0	5.05303	13.9205	ADIPOR1	VASN
cell-cell adhesion via plasma-membrane adhesion molecules (GO:0098742)	3-170	0.0645789	0.285983	0	0	3.37468	9.24617	TENM3	CNTN2	LRRC4B
negative regulation of apoptotic signaling pathway (GO:2001234)	2-78	0.066574	0.285983	0	0	4.91956	13.3293	ASAH2	MPV17L
relaxation of cardiac muscle (GO:0055119)	1-22	0.0679894	0.285983	0	0	15.4829	41.6242	CHGA
negative regulation of reactive oxygen species biosynthetic process (GO:1903427)	1-22	0.0679894	0.285983	0	0	15.4829	41.6242	MPV17L
sphingoid biosynthetic process (GO:0046520)	1-22	0.0679894	0.285983	0	0	15.4829	41.6242	ASAH2
sphingosine biosynthetic process (GO:0046512)	1-22	0.0679894	0.285983	0	0	15.4829	41.6242	ASAH2
lipid oxidation (GO:0034440)	1-22	0.0679894	0.285983	0	0	15.4829	41.6242	ADIPOR1
positive regulation of protein localization to cell surface (GO:2000010)	1-22	0.0679894	0.285983	0	0	15.4829	41.6242	RANGRF
regulation of nucleocytoplasmic transport (GO:0046822)	1-22	0.0679894	0.285983	0	0	15.4829	41.6242	PTPN14
negative regulation of NF-kappaB transcription factor activity (GO:0032088)	2-79	0.0680695	0.285983	0	0	4.85543	13.0476	TCEAL7	MTURN
mitochondrion organization (GO:0007005)	3-175	0.0691624	0.288638	0	0	3.27575	8.7505	TIMM8B	ALAS1	COX7A2
ether lipid metabolic process (GO:0046485)	1-22	0.0730255	0.293038	0	0	14.2912	37.3992	FAR1
negative regulation of translational initiation (GO:0045947)	1-22	0.0730255	0.293038	0	0	14.2912	37.3992	PAIP2
positive regulation of potassium ion transmembrane transporter activity (GO:1901018)	1-22	0.0730255	0.293038	0	0	14.2912	37.3992	GAL
synaptic membrane adhesion (GO:0099560)	1-22	0.0730255	0.293038	0	0	14.2912	37.3992	LRRC4B
tRNA wobble base modification (GO:0002097)	1-22	0.0730255	0.293038	0	0	14.2912	37.3992	URM1
tRNA wobble uridine modification (GO:0002098)	1-22	0.0730255	0.293038	0	0	14.2912	37.3992	URM1
protein trimerization (GO:0070206)	1-22	0.0780347	0.297386	0	0	13.2697	33.8457	SLC1A5
regulation of aerobic respiration (GO:1903715)	1-22	0.0780347	0.297386	0	0	13.2697	33.8457	COX7A2
heterocycle biosynthetic process (GO:0018130)	1-22	0.0780347	0.297386	0	0	13.2697	33.8457	LIAS
protein homotrimerization (GO:0070207)	1-22	0.0780347	0.297386	0	0	13.2697	33.8457	SLC1A5
protein kinase A signaling (GO:0010737)	1-22	0.0780347	0.297386	0	0	13.2697	33.8457	GAL
glucose homeostasis (GO:0042593)	2-86	0.0788406	0.297386	0	0	4.44924	11.3025	CRTC2	ADIPOR1
positive regulation of neuron projection development (GO:0010976)	2-88	0.0820105	0.297386	0	0	4.34533	10.8673	TENM3	VLDLR
negative regulation of cell-substrate junction organization (GO:0150118)	1-22	0.083017	0.297386	0	0	12.3844	30.8212	ARHGAP6
regulation of systemic arterial blood pressure (GO:0003073)	1-22	0.083017	0.297386	0	0	12.3844	30.8212	ADM
negative regulation of focal adhesion assembly (GO:0051895)	1-22	0.083017	0.297386	0	0	12.3844	30.8212	ARHGAP6
regulation of cellular carbohydrate metabolic process (GO:0010675)	1-22	0.083017	0.297386	0	0	12.3844	30.8212	ADIPOR1
negative regulation of receptor signaling pathway via JAK-STAT (GO:0046426)	1-22	0.083017	0.297386	0	0	12.3844	30.8212	ADIPOR1
sphingolipid catabolic process (GO:0030149)	1-22	0.083017	0.297386	0	0	12.3844	30.8212	ASAH2
ceramide catabolic process (GO:0046514)	1-22	0.083017	0.297386	0	0	12.3844	30.8212	ASAH2
positive regulation of small molecule metabolic process (GO:0062013)	1-22	0.083017	0.297386	0	0	12.3844	30.8212	ADM
nuclear transport (GO:0051169)	1-22	0.083017	0.297386	0	0	12.3844	30.8212	BANF1
dendrite self-avoidance (GO:0070593)	1-22	0.083017	0.297386	0	0	12.3844	30.8212	CNTN2
regulation of oxidative phosphorylation (GO:0002082)	1-22	0.083017	0.297386	0	0	12.3844	30.8212	COX7A2
mitochondrial translational elongation (GO:0070125)	2-89	0.0836101	0.297386	0	0	4.29516	10.6588	MRPL41	MRPL35
mitochondrial translational termination (GO:0070126)	2-89	0.0836101	0.297386	0	0	4.29516	10.6588	MRPL41	MRPL35
regulation of mRNA splicing, via spliceosome (GO:0048024)	2-90	0.0852192	0.298239	0	0	4.24614	10.4562	ZC3H10	SF1
mitochondrial respiratory chain complex assembly (GO:0033108)	2-90	0.0852192	0.298239	0	0	4.24614	10.4562	NDUFAB1	COA5
regulation of Arp2/3 complex-mediated actin nucleation (GO:0034315)	1-22	0.0879727	0.298239	0	0	11.6098	28.2203	BRK1
negative regulation of insulin secretion (GO:0046676)	1-22	0.0879727	0.298239	0	0	11.6098	28.2203	CHGA
positive regulation of heart rate (GO:0010460)	1-22	0.0879727	0.298239	0	0	11.6098	28.2203	ADM
positive regulation of muscle hypertrophy (GO:0014742)	1-22	0.0879727	0.298239	0	0	11.6098	28.2203	MTPN
mitochondrial electron transport, cytochrome c to oxygen (GO:0006123)	1-22	0.0879727	0.298239	0	0	11.6098	28.2203	COX7C
diol biosynthetic process (GO:0034312)	1-22	0.0879727	0.298239	0	0	11.6098	28.2203	ASAH2
positive regulation of cellular component biogenesis (GO:0044089)	2-92	0.0884657	0.298239	0	0	4.15136	10.0676	CHGA	BRK1
positive regulation of cardiac muscle hypertrophy (GO:0010613)	1-22	0.0929018	0.298239	0	0	10.9263	25.9633	MTPN
carbohydrate derivative transport (GO:1901264)	1-22	0.0929018	0.298239	0	0	10.9263	25.9633	VLDLR
negative regulation of peptide hormone secretion (GO:0090278)	1-22	0.0929018	0.298239	0	0	10.9263	25.9633	CHGA
regulation of fatty acid metabolic process (GO:0019217)	1-22	0.0929018	0.298239	0	0	10.9263	25.9633	ADIPOR1
regulation of membrane depolarization (GO:0003254)	1-22	0.0929018	0.298239	0	0	10.9263	25.9633	RANGRF
regulation of mitochondrial outer membrane permeabilization involved in apoptotic signaling pathway (GO:1901028)	1-22	0.0929018	0.298239	0	0	10.9263	25.9633	MPV17L
embryonic axis specification (GO:0000578)	1-22	0.0929018	0.298239	0	0	10.9263	25.9633	HOXD8
regulation of presynapse assembly (GO:1905606)	1-22	0.0929018	0.298239	0	0	10.9263	25.9633	LRRC4B
regulation of presynapse organization (GO:0099174)	1-22	0.0929018	0.298239	0	0	10.9263	25.9633	LRRC4B
regulation of production of miRNAs involved in gene silencing by miRNA (GO:1903798)	1-22	0.0929018	0.298239	0	0	10.9263	25.9633	ZC3H10
ciliary basal body-plasma membrane docking (GO:0097711)	2-95	0.0934034	0.298319	0	0	4.01684	9.52323	SSNA1	FBF1
translational termination (GO:0006415)	2-96	0.0950669	0.298662	0	0	3.97391	9.35129	MRPL41	MRPL35
axon guidance (GO:0007411)	3-203	0.0973927	0.298662	0	0	2.81314	6.55182	LAMA1	CNTN2	VLDLR
Rac protein signal transduction (GO:0016601)	1-22	0.0978046	0.298662	0	0	10.3188	23.989	BRK1
positive regulation of G protein-coupled receptor signaling pathway (GO:0045745)	1-22	0.0978046	0.298662	0	0	10.3188	23.989	CHGA
negative regulation of RNA metabolic process (GO:0051253)	1-22	0.0978046	0.298662	0	0	10.3188	23.989	ZC3H10
sphingosine metabolic process (GO:0006670)	1-22	0.0978046	0.298662	0	0	10.3188	23.989	ASAH2
diol metabolic process (GO:0034311)	1-22	0.0978046	0.298662	0	0	10.3188	23.989	ASAH2
postsynaptic membrane organization (GO:0001941)	1-22	0.0978046	0.298662	0	0	10.3188	23.989	LHFPL4
protein import into mitochondrial matrix (GO:0030150)	1-22	0.0978046	0.298662	0	0	10.3188	23.989	TOMM40L
establishment of epithelial cell polarity (GO:0090162)	1-22	0.102681	0.3032	0	0	9.77521	22.2496	FBF1
eye morphogenesis (GO:0048592)	1-22	0.102681	0.3032	0	0	9.77521	22.2496	TENM3
positive regulation of G2/M transition of mitotic cell cycle (GO:0010971)	1-22	0.102681	0.3032	0	0	9.77521	22.2496	CDC25B
insulin secretion (GO:0030073)	1-22	0.102681	0.3032	0	0	9.77521	22.2496	GAL
positive regulation of nitrogen compound metabolic process (GO:0051173)	1-22	0.102681	0.3032	0	0	9.77521	22.2496	MTPN
mitochondrial cytochrome c oxidase assembly (GO:0033617)	1-22	0.102681	0.3032	0	0	9.77521	22.2496	COA5
myeloid cell development (GO:0061515)	1-22	0.102681	0.3032	0	0	9.77521	22.2496	ALAS1
intrinsic apoptotic signaling pathway (GO:0097193)	2-102	0.105223	0.308783	0	0	3.73434	8.40852	MLLT11	GSKIP
positive regulation of antigen receptor-mediated signaling pathway (GO:0050857)	1-22	0.107531	0.308783	0	0	9.28598	20.7075	SLC39A10
anterior/posterior axis specification (GO:0009948)	1-22	0.107531	0.308783	0	0	9.28598	20.7075	HOXD8
hydrogen peroxide catabolic process (GO:0042744)	1-22	0.107531	0.308783	0	0	9.28598	20.7075	HBA1
regulation of mitochondrial translation (GO:0070129)	1-22	0.107531	0.308783	0	0	9.28598	20.7075	MTG2
mitochondrial calcium ion transmembrane transport (GO:0006851)	1-22	0.107531	0.308783	0	0	9.28598	20.7075	SLC25A23
translational elongation (GO:0006414)	2-104	0.108671	0.309845	0	0	3.66075	8.12476	MRPL41	MRPL35
negative regulation of multicellular organismal process (GO:0051241)	3-214	0.109582	0.309845	0	0	2.665	5.89252	ADM	ADIPOR1	VASN
mitochondrial translation (GO:0032543)	2-105	0.110407	0.309845	0	0	3.62502	7.98803	MRPL41	MRPL35
fatty-acyl-CoA metabolic process (GO:0035337)	1-22	0.112356	0.309845	0	0	8.84335	19.3323	FAR1
heme biosynthetic process (GO:0006783)	1-22	0.112356	0.309845	0	0	8.84335	19.3323	ALAS1
membrane lipid metabolic process (GO:0006643)	1-22	0.112356	0.309845	0	0	8.84335	19.3323	CERK
mitochondrial calcium ion homeostasis (GO:0051560)	1-22	0.112356	0.309845	0	0	8.84335	19.3323	SLC25A23
zinc ion transmembrane transport (GO:0071577)	1-22	0.112356	0.309845	0	0	8.84335	19.3323	SLC39A10
protein import into peroxisome membrane (GO:0045046)	1-22	0.112356	0.309845	0	0	8.84335	19.3323	PEX19
positive regulation of cell cycle G2/M phase transition (GO:1902751)	1-22	0.117154	0.315398	0	0	8.44095	18.0996	CDC25B
regulation of B cell receptor signaling pathway (GO:0050855)	1-22	0.117154	0.315398	0	0	8.44095	18.0996	SLC39A10
respiratory chain complex IV assembly (GO:0008535)	1-22	0.117154	0.315398	0	0	8.44095	18.0996	COA5
regulation of protein export from nucleus (GO:0046825)	1-22	0.117154	0.315398	0	0	8.44095	18.0996	PTPN14
lipid transport (GO:0006869)	2-109	0.117422	0.315398	0	0	3.4888	7.47295	SLC10A4	PEX19
amino acid import across plasma membrane (GO:0089718)	1-22	0.121927	0.315398	0	0	8.07355	16.9894	SLC1A5
regulation of cardiac muscle hypertrophy (GO:0010611)	1-22	0.121927	0.315398	0	0	8.07355	16.9894	MTPN
positive regulation of lamellipodium assembly (GO:0010592)	1-22	0.121927	0.315398	0	0	8.07355	16.9894	BRK1
negative regulation of NIK/NF-kappaB signaling (GO:1901223)	1-22	0.121927	0.315398	0	0	8.07355	16.9894	ADIPOR1
negative regulation of stress fiber assembly (GO:0051497)	1-22	0.121927	0.315398	0	0	8.07355	16.9894	ARHGAP6
long-chain fatty-acyl-CoA metabolic process (GO:0035336)	1-22	0.121927	0.315398	0	0	8.07355	16.9894	FAR1
neuromuscular junction development (GO:0007528)	1-22	0.121927	0.315398	0	0	8.07355	16.9894	ZC4H2
DNA packaging (GO:0006323)	1-22	0.121927	0.315398	0	0	8.07355	16.9894	BANF1
protein exit from endoplasmic reticulum (GO:0032527)	1-22	0.121927	0.315398	0	0	8.07355	16.9894	RANGRF
porphyrin-containing compound biosynthetic process (GO:0006779)	1-22	0.121927	0.315398	0	0	8.07355	16.9894	ALAS1
negative regulation of cell junction assembly (GO:1901889)	1-22	0.126674	0.321045	0	0	7.73676	15.9852	ARHGAP6
receptor catabolic process (GO:0032801)	1-22	0.126674	0.321045	0	0	7.73676	15.9852	VLDLR
cAMP-mediated signaling (GO:0019933)	1-22	0.126674	0.321045	0	0	7.73676	15.9852	GAL
positive regulation of release of cytochrome c from mitochondria (GO:0090200)	1-22	0.126674	0.321045	0	0	7.73676	15.9852	MLLT11
peroxisome organization (GO:0007031)	1-22	0.126674	0.321045	0	0	7.73676	15.9852	PEX19
cellular amide metabolic process (GO:0043603)	2-115	0.128147	0.322169	0	0	3.30255	6.78535	ASAH2	CERK
positive regulation of protein metabolic process (GO:0051247)	2-115	0.128147	0.322169	0	0	3.30255	6.78535	MTPN	C4BPA
sphingolipid metabolic process (GO:0006665)	2-116	0.129957	0.325411	0	0	3.27342	6.67959	ASAH2	CERK
positive regulation of filopodium assembly (GO:0051491)	1-22	0.131396	0.326405	0	0	7.42692	15.0732	MIEN1
organelle fission (GO:0048285)	1-22	0.131396	0.326405	0	0	7.42692	15.0732	PEX19
positive regulation of mitotic cell cycle (GO:0045931)	1-22	0.136093	0.330032	0	0	7.14091	14.2419	CDC25B
peptide hormone secretion (GO:0030072)	1-22	0.136093	0.330032	0	0	7.14091	14.2419	GAL
peroxisomal membrane transport (GO:0015919)	1-22	0.136093	0.330032	0	0	7.14091	14.2419	PEX19
negative regulation of actin filament bundle assembly (GO:0032232)	1-22	0.136093	0.330032	0	0	7.14091	14.2419	ARHGAP6
entrainment of circadian clock by photoperiod (GO:0043153)	1-22	0.136093	0.330032	0	0	7.14091	14.2419	CRTC1
axonogenesis (GO:0007409)	3-240	0.140537	0.330032	0	0	2.3695	4.64964	LAMA1	CNTN2	VLDLR
regulation of small molecule metabolic process (GO:0062012)	1-22	0.140764	0.330032	0	0	6.87608	13.4817	ADIPOR1
regulation of sodium ion transmembrane transport (GO:1902305)	1-22	0.140764	0.330032	0	0	6.87608	13.4817	RANGRF
bile acid and bile salt transport (GO:0015721)	1-22	0.140764	0.330032	0	0	6.87608	13.4817	SLC10A4
calcium ion import (GO:0070509)	1-22	0.140764	0.330032	0	0	6.87608	13.4817	SLC25A23
cellular zinc ion homeostasis (GO:0006882)	1-22	0.140764	0.330032	0	0	6.87608	13.4817	SLC39A10
neutral amino acid transport (GO:0015804)	1-22	0.140764	0.330032	0	0	6.87608	13.4817	SLC1A5
positive regulation of synapse assembly (GO:0051965)	1-22	0.140764	0.330032	0	0	6.87608	13.4817	LRRC4B
cytosolic calcium ion transport (GO:0060401)	1-22	0.140764	0.330032	0	0	6.87608	13.4817	SLC25A23
photoperiodism (GO:0009648)	1-22	0.140764	0.330032	0	0	6.87608	13.4817	CRTC1
cellular response to organic substance (GO:0071310)	2-123	0.142786	0.331873	0	0	3.08296	6.0007	ASAH2	PTPN14
fatty acid metabolic process (GO:0006631)	2-124	0.14464	0.331873	0	0	3.05753	5.91175	NDUFAB1	ADIPOR1
actin filament polymerization (GO:0030041)	1-22	0.145411	0.331873	0	0	6.63017	12.7843	ARHGAP6
protein targeting to peroxisome (GO:0006625)	1-22	0.145411	0.331873	0	0	6.63017	12.7843	PEX19
hydrogen peroxide metabolic process (GO:0042743)	1-22	0.145411	0.331873	0	0	6.63017	12.7843	HBA1
regulation of fatty acid biosynthetic process (GO:0042304)	1-22	0.145411	0.331873	0	0	6.63017	12.7843	ADIPOR1
protein targeting (GO:0006605)	2-125	0.1465	0.331873	0	0	3.03252	5.82465	TIMM8B	PEX19
positive regulation of DNA-binding transcription factor activity (GO:0051091)	3-246	0.148064	0.331873	0	0	2.31029	4.41291	MTPN	CRTC2	CRTC1
regulation of vasoconstriction (GO:0019229)	1-22	0.150032	0.331873	0	0	6.40122	12.1425	ADM
regulation of catecholamine secretion (GO:0050433)	1-22	0.150032	0.331873	0	0	6.40122	12.1425	CHGA
regulation of cation transmembrane transport (GO:1904062)	1-22	0.150032	0.331873	0	0	6.40122	12.1425	RANGRF
heterotypic cell-cell adhesion (GO:0034113)	1-22	0.150032	0.331873	0	0	6.40122	12.1425	DSC2
ion homeostasis (GO:0050801)	1-22	0.150032	0.331873	0	0	6.40122	12.1425	RANGRF
long-chain fatty acid biosynthetic process (GO:0042759)	1-22	0.150032	0.331873	0	0	6.40122	12.1425	ASAH2
zinc ion homeostasis (GO:0055069)	1-22	0.150032	0.331873	0	0	6.40122	12.1425	SLC39A10
mRNA splice site selection (GO:0006376)	1-22	0.150032	0.331873	0	0	6.40122	12.1425	SF1
positive regulation of macromolecule biosynthetic process (GO:0010557)	2-129	0.153987	0.33783	0	0	2.93641	5.49369	MTPN	PRR16
regulation of cellular component size (GO:0032535)	1-22	0.154629	0.33783	0	0	6.18754	11.5504	MTPN
cellular nitrogen compound biosynthetic process (GO:0044271)	1-22	0.154629	0.33783	0	0	6.18754	11.5504	ASAH2
cell cycle G2/M phase transition (GO:0044839)	2-131	0.157759	0.33783	0	0	2.8906	5.33803	SSNA1	CDC25B
activation of phospholipase C activity (GO:0007202)	1-32	0.159201	0.33783	0	0	5.98764	11.0028	ARHGAP6
protein transmembrane import into intracellular organelle (GO:0044743)	1-32	0.159201	0.33783	0	0	5.98764	11.0028	TOMM40L
negative regulation of cell-matrix adhesion (GO:0001953)	1-32	0.159201	0.33783	0	0	5.98764	11.0028	ARHGAP6
regulation of transcription involved in G1/S transition of mitotic cell cycle (GO:0000083)	1-32	0.159201	0.33783	0	0	5.98764	11.0028	BACH1
regulation of cellular amide metabolic process (GO:0034248)	1-32	0.159201	0.33783	0	0	5.98764	11.0028	MTPN
regulation of cellular biosynthetic process (GO:0031326)	1-32	0.159201	0.33783	0	0	5.98764	11.0028	ADIPOR1
positive regulation of lamellipodium organization (GO:1902745)	1-32	0.159201	0.33783	0	0	5.98764	11.0028	BRK1
regulation of intracellular protein transport (GO:0033157)	1-32	0.159201	0.33783	0	0	5.98764	11.0028	PTPN14
vasculogenesis (GO:0001570)	1-33	0.163749	0.34514	0	0	5.80023	10.4951	ADM
regulation of protein localization to cell surface (GO:2000008)	1-33	0.163749	0.34514	0	0	5.80023	10.4951	RANGRF
organic substance transport (GO:0071702)	2-136	0.167263	0.347651	0	0	2.78203	4.97481	PEX19	SLC6A2
negative regulation of mitochondrion organization (GO:0010823)	1-34	0.168272	0.347651	0	0	5.62419	10.0233	MPV17L
regulation of glucose metabolic process (GO:0010906)	1-34	0.168272	0.347651	0	0	5.62419	10.0233	ADIPOR1
central nervous system neuron differentiation (GO:0021953)	1-34	0.168272	0.347651	0	0	5.62419	10.0233	ZC4H2
regulation of lamellipodium assembly (GO:0010591)	1-34	0.168272	0.347651	0	0	5.62419	10.0233	BRK1
organic cyclic compound biosynthetic process (GO:1901362)	1-34	0.168272	0.347651	0	0	5.62419	10.0233	LIAS
negative regulation of epithelial cell migration (GO:0010633)	1-35	0.172771	0.351151	0	0	5.45849	9.58397	ADIPOR1
bicarbonate transport (GO:0015701)	1-35	0.172771	0.351151	0	0	5.45849	9.58397	HBA1
regulation of lipid biosynthetic process (GO:0046890)	1-35	0.172771	0.351151	0	0	5.45849	9.58397	ADIPOR1
oxoacid metabolic process (GO:0043436)	1-35	0.172771	0.351151	0	0	5.45849	9.58397	LIAS
regulation of protein polymerization (GO:0032271)	1-35	0.172771	0.351151	0	0	5.45849	9.58397	PLEKHG2
regulation of small GTPase mediated signal transduction (GO:0051056)	2-141	0.176863	0.353362	0	0	2.68128	4.645	PLEKHG2	ARHGAP6
regulation of sodium ion transport (GO:0002028)	1-36	0.177246	0.353362	0	0	5.30227	9.17409	RANGRF
regulation of cardiac muscle contraction (GO:0055117)	1-36	0.177246	0.353362	0	0	5.30227	9.17409	CHGA
cyclic-nucleotide-mediated signaling (GO:0019935)	1-36	0.177246	0.353362	0	0	5.30227	9.17409	GAL
regulation of mRNA processing (GO:0050684)	1-36	0.177246	0.353362	0	0	5.30227	9.17409	SF1
mitochondrion disassembly (GO:0061726)	1-36	0.177246	0.353362	0	0	5.30227	9.17409	FUNDC1
negative regulation of DNA-binding transcription factor activity (GO:0043433)	2-143	0.180728	0.355444	0	0	2.64298	4.52151	TCEAL7	MTURN
positive regulation of cytokinesis (GO:0032467)	1-37	0.181696	0.355444	0	0	5.15472	8.79096	CDC25B
regulation of transport (GO:0051049)	1-37	0.181696	0.355444	0	0	5.15472	8.79096	ICA1
positive regulation of myeloid cell differentiation (GO:0045639)	1-37	0.181696	0.355444	0	0	5.15472	8.79096	MTURN
lysosome localization (GO:0032418)	1-37	0.181696	0.355444	0	0	5.15472	8.79096	CHGA
phospholipid biosynthetic process (GO:0008654)	1-37	0.181696	0.355444	0	0	5.15472	8.79096	FAR1
regulation of apoptotic signaling pathway (GO:2001233)	1-38	0.186123	0.361843	0	0	5.01516	8.43221	ASAH2
regulation of cell communication (GO:0010646)	1-38	0.186123	0.361843	0	0	5.01516	8.43221	IGFBPL1
regulation of dendrite development (GO:0050773)	1-39	0.190527	0.363129	0	0	4.88293	8.09572	VLDLR
negative regulation of protein secretion (GO:0050709)	1-39	0.190527	0.363129	0	0	4.88293	8.09572	CHGA
negative regulation of secretion by cell (GO:1903531)	1-39	0.190527	0.363129	0	0	4.88293	8.09572	CHGA
regulation of heart rate by cardiac conduction (GO:0086091)	1-39	0.190527	0.363129	0	0	4.88293	8.09572	DSC2
regulation of ion transmembrane transporter activity (GO:0032412)	1-39	0.190527	0.363129	0	0	4.88293	8.09572	RANGRF
mitochondrial electron transport, NADH to ubiquinone (GO:0006120)	1-39	0.190527	0.363129	0	0	4.88293	8.09572	NDUFAB1
regulation of G2/M transition of mitotic cell cycle (GO:0010389)	2-149	0.192397	0.363129	0	0	2.53433	4.17708	SSNA1	CDC25B
response to cytokine (GO:0034097)	2-150	0.194351	0.363129	0	0	2.51708	4.1232	ASAH2	PTPN14
positive regulation of cation channel activity (GO:2001259)	1-40	0.194906	0.363129	0	0	4.75749	7.77961	GAL
regulation of sodium ion transmembrane transporter activity (GO:2000649)	1-40	0.194906	0.363129	0	0	4.75749	7.77961	RANGRF
fatty acid derivative biosynthetic process (GO:1901570)	1-40	0.194906	0.363129	0	0	4.75749	7.77961	FAR1
autophagy of mitochondrion (GO:0000422)	1-40	0.194906	0.363129	0	0	4.75749	7.77961	FUNDC1
carboxylic acid metabolic process (GO:0019752)	1-40	0.194906	0.363129	0	0	4.75749	7.77961	LIAS
organic hydroxy compound transport (GO:0015850)	1-40	0.194906	0.363129	0	0	4.75749	7.77961	SLC10A4
regulation of release of cytochrome c from mitochondria (GO:0090199)	1-41	0.199263	0.366878	0	0	4.63832	7.48222	MLLT11
gluconeogenesis (GO:0006094)	1-41	0.199263	0.366878	0	0	4.63832	7.48222	CRTC2
regulation of filopodium assembly (GO:0051489)	1-41	0.199263	0.366878	0	0	4.63832	7.48222	MIEN1
JNK cascade (GO:0007254)	1-41	0.199263	0.366878	0	0	4.63832	7.48222	MAP3K12
heterophilic cell-cell adhesion via plasma membrane cell adhesion molecules (GO:0007157)	1-42	0.203596	0.372663	0	0	4.52496	7.20202	TENM3
ceramide biosynthetic process (GO:0046513)	1-42	0.203596	0.372663	0	0	4.52496	7.20202	ASAH2
regulation of cell-cell adhesion (GO:0022407)	1-43	0.207905	0.377242	0	0	4.417	6.93766	TENM3
positive regulation of neuron differentiation (GO:0045666)	1-43	0.207905	0.377242	0	0	4.417	6.93766	ZC4H2
positive regulation of phospholipase C activity (GO:0010863)	1-43	0.207905	0.377242	0	0	4.417	6.93766	ARHGAP6
positive regulation of biosynthetic process (GO:0009891)	1-44	0.212192	0.37952	0	0	4.31406	6.68794	MTPN
positive regulation of cell division (GO:0051781)	1-44	0.212192	0.37952	0	0	4.31406	6.68794	CDC25B
hexose biosynthetic process (GO:0019319)	1-44	0.212192	0.37952	0	0	4.31406	6.68794	CRTC2
homotypic cell-cell adhesion (GO:0034109)	1-44	0.212192	0.37952	0	0	4.31406	6.68794	DSC2
intracellular protein transmembrane transport (GO:0065002)	1-44	0.212192	0.37952	0	0	4.31406	6.68794	TOMM40L
regulation of receptor signaling pathway via JAK-STAT (GO:0046425)	1-45	0.216455	0.383855	0	0	4.2158	6.45175	ADIPOR1
positive regulation of nervous system development (GO:0051962)	1-45	0.216455	0.383855	0	0	4.2158	6.45175	LRRC4B
chromosome condensation (GO:0030261)	1-45	0.216455	0.383855	0	0	4.2158	6.45175	BANF1
peptide biosynthetic process (GO:0043043)	2-162	0.217989	0.385482	0	0	2.32689	3.54458	MRPL41	MRPL35
erythrocyte differentiation (GO:0030218)	1-46	0.220696	0.388078	0	0	4.12191	6.22808	ALAS1
spliceosomal complex assembly (GO:0000245)	1-46	0.220696	0.388078	0	0	4.12191	6.22808	SF1
nervous system development (GO:0007399)	4-447	0.222409	0.389994	0	0	1.68857	2.53833	TIMM8A	ZC4H2	LSAMP	VLDLR
glycosphingolipid metabolic process (GO:0006687)	1-47	0.224914	0.393285	0	0	4.0321	6.01605	CERK
regulation of protein metabolic process (GO:0051246)	1-48	0.229109	0.399505	0	0	3.94611	5.81482	MTPN
cellular protein-containing complex assembly (GO:0034622)	2-168	0.229905	0.399779	0	0	2.2421	3.29609	POMP	COX7A2
receptor internalization (GO:0031623)	1-49	0.233282	0.401194	0	0	3.86371	5.62365	ADM
response to hydrogen peroxide (GO:0042542)	1-49	0.233282	0.401194	0	0	3.86371	5.62365	HBA1
regulation of cellular protein metabolic process (GO:0032268)	1-49	0.233282	0.401194	0	0	3.86371	5.62365	MTPN
positive regulation of actin filament polymerization (GO:0030838)	1-49	0.233282	0.401194	0	0	3.86371	5.62365	CDC42EP4
actin polymerization or depolymerization (GO:0008154)	1-50	0.237432	0.405747	0	0	3.78467	5.44187	ARHGAP6
regulation of complement activation (GO:0030449)	1-50	0.237432	0.405747	0	0	3.78467	5.44187	C4BPA
positive regulation of ERK1 and ERK2 cascade (GO:0070374)	2-172	0.237874	0.405747	0	0	2.1889	3.14329	MTURN	MAP3K12
cellular macromolecule biosynthetic process (GO:0034645)	3-314	0.24074	0.407009	0	0	1.7989	2.5617	MRPL41	ALAS1	MRPL35
regulation of epithelial cell migration (GO:0010632)	1-51	0.241561	0.407009	0	0	3.70879	5.26883	ADIPOR1
mitotic nuclear membrane organization (GO:0101024)	1-51	0.241561	0.407009	0	0	3.70879	5.26883	BANF1
mitotic nuclear membrane reassembly (GO:0007084)	1-51	0.241561	0.407009	0	0	3.70879	5.26883	BANF1
neuron differentiation (GO:0030182)	2-174	0.241865	0.407009	0	0	2.16323	3.07044	MTPN	TENM3
negative regulation of cellular biosynthetic process (GO:0031327)	1-52	0.245667	0.407924	0	0	3.63588	5.10398	MPV17L
amide biosynthetic process (GO:0043604)	1-52	0.245667	0.407924	0	0	3.63588	5.10398	ASAH2
glycolipid metabolic process (GO:0006664)	1-52	0.245667	0.407924	0	0	3.63588	5.10398	CERK
positive regulation of protein localization to cell periphery (GO:1904377)	1-52	0.245667	0.407924	0	0	3.63588	5.10398	RANGRF
positive regulation of protein localization to plasma membrane (GO:1903078)	1-52	0.245667	0.407924	0	0	3.63588	5.10398	RANGRF
positive regulation of developmental process (GO:0051094)	2-177	0.247857	0.410472	0	0	2.12582	2.96532	PPP1R13L	VLDLR
regulation of immune effector process (GO:0002697)	1-53	0.249751	0.411604	0	0	3.56578	4.94678	C4BPA
regulation of mitotic cell cycle (GO:0007346)	2-178	0.249855	0.411604	0	0	2.11364	2.93135	ASAH2	CDC25B
regulation of alternative mRNA splicing, via spliceosome (GO:0000381)	1-54	0.253813	0.411624	0	0	3.49832	4.79676	ZC3H10
regulation of focal adhesion assembly (GO:0051893)	1-54	0.253813	0.411624	0	0	3.49832	4.79676	ARHGAP6
regulation of humoral immune response (GO:0002920)	1-54	0.253813	0.411624	0	0	3.49832	4.79676	C4BPA
negative regulation of viral genome replication (GO:0045071)	1-54	0.253813	0.411624	0	0	3.49832	4.79676	BANF1
nuclear membrane reassembly (GO:0031468)	1-54	0.253813	0.411624	0	0	3.49832	4.79676	BANF1
regulation of megakaryocyte differentiation (GO:0045652)	1-54	0.253813	0.411624	0	0	3.49832	4.79676	MTURN
regulation of ATP metabolic process (GO:1903578)	1-56	0.261872	0.422504	0	0	3.37077	4.5165	COX7A2
mitochondrial transport (GO:0006839)	1-56	0.261872	0.422504	0	0	3.37077	4.5165	TIMM8B
positive regulation of cell junction assembly (GO:1901890)	1-57	0.265869	0.424429	0	0	3.31041	4.38548	LRRC4B
carboxylic acid transport (GO:0046942)	1-57	0.265869	0.424429	0	0	3.31041	4.38548	SLC1A5
monocarboxylic acid transport (GO:0015718)	1-57	0.265869	0.424429	0	0	3.31041	4.38548	SLC10A4
eye development (GO:0001654)	1-58	0.269844	0.424429	0	0	3.25217	4.26005	LAMA1
receptor metabolic process (GO:0043112)	1-58	0.269844	0.424429	0	0	3.25217	4.26005	ADM
RNA modification (GO:0009451)	1-58	0.269844	0.424429	0	0	3.25217	4.26005	URM1
positive regulation of mitochondrion organization (GO:0010822)	1-58	0.269844	0.424429	0	0	3.25217	4.26005	MLLT11
positive regulation of mitotic cell cycle phase transition (GO:1901992)	1-58	0.269844	0.424429	0	0	3.25217	4.26005	CDC25B
mitochondrial respiratory chain complex I assembly (GO:0032981)	1-58	0.269844	0.424429	0	0	3.25217	4.26005	NDUFAB1
NADH dehydrogenase complex assembly (GO:0010257)	1-58	0.269844	0.424429	0	0	3.25217	4.26005	NDUFAB1
protein polymerization (GO:0051258)	1-59	0.273799	0.427426	0	0	3.19594	4.1399	ARHGAP6
fatty acid oxidation (GO:0019395)	1-59	0.273799	0.427426	0	0	3.19594	4.1399	ADIPOR1
response to reactive oxygen species (GO:0000302)	1-59	0.273799	0.427426	0	0	3.19594	4.1399	HBA1
negative regulation of cell differentiation (GO:0045596)	2-191	0.275864	0.429284	0	0	1.96696	2.53314	ADIPOR1	VASN
apical junction assembly (GO:0043297)	1-60	0.277732	0.429284	0	0	3.14161	4.02472	FBF1
cellular protein catabolic process (GO:0044257)	1-60	0.277732	0.429284	0	0	3.14161	4.02472	VLDLR
peptidyl-threonine phosphorylation (GO:0018107)	1-60	0.277732	0.429284	0	0	3.14161	4.02472	MAP3K12
regulation of DNA-templated transcription, initiation (GO:2000142)	1-61	0.281644	0.434259	0	0	3.0891	3.91423	MED10
glucose metabolic process (GO:0006006)	1-62	0.285535	0.437029	0	0	3.0383	3.80818	CRTC2
negative regulation of kinase activity (GO:0033673)	1-62	0.285535	0.437029	0	0	3.0383	3.80818	GSKIP
stress-activated MAPK cascade (GO:0051403)	1-62	0.285535	0.437029	0	0	3.0383	3.80818	MAP3K12
actin cytoskeleton reorganization (GO:0031532)	1-63	0.289405	0.439353	0	0	2.98915	3.70633	THSD7A
neuropeptide signaling pathway (GO:0007218)	1-63	0.289405	0.439353	0	0	2.98915	3.70633	GAL
monocarboxylic acid biosynthetic process (GO:0072330)	1-63	0.289405	0.439353	0	0	2.98915	3.70633	NDUFAB1
regulation of signal transduction (GO:0009966)	2-198	0.28986	0.439353	0	0	1.89603	2.34796	IGFBPL1	GSKIP
protein secretion (GO:0009306)	1-64	0.293254	0.441291	0	0	2.94155	3.60845	GAL
regulation of transcription initiation from RNA polymerase II promoter (GO:0060260)	1-64	0.293254	0.441291	0	0	2.94155	3.60845	MED10
tRNA processing (GO:0008033)	1-64	0.293254	0.441291	0	0	2.94155	3.60845	URM1
tRNA modification (GO:0006400)	1-65	0.297083	0.445981	0	0	2.89544	3.51433	URM1
positive regulation of cell cycle (GO:0045787)	1-66	0.300891	0.448471	0	0	2.85075	3.42378	CDC25B
positive regulation of cell death (GO:0010942)	1-66	0.300891	0.448471	0	0	2.85075	3.42378	HBA1
cell-cell junction assembly (GO:0007043)	1-66	0.300891	0.448471	0	0	2.85075	3.42378	FBF1
positive regulation of catabolic process (GO:0009896)	1-67	0.304679	0.449832	0	0	2.80742	3.33661	C4BPA
regulation of viral genome replication (GO:0045069)	1-67	0.304679	0.449832	0	0	2.80742	3.33661	BANF1
vascular endothelial growth factor receptor signaling pathway (GO:0048010)	1-67	0.304679	0.449832	0	0	2.80742	3.33661	BRK1
peptidyl-threonine modification (GO:0018210)	1-67	0.304679	0.449832	0	0	2.80742	3.33661	MAP3K12
positive regulation of transcription, DNA-templated (GO:0045893)	8-1183	0.307906	0.452195	0	0	1.27435	1.50113	MLLT11	CRTC2	GAL	CRTC1	MED10	MED21	HOXD8	MAP3K12
regulation of translational initiation (GO:0006446)	1-68	0.308446	0.452195	0	0	2.76538	3.25266	PAIP2
negative regulation of transforming growth factor beta receptor signaling pathway (GO:0030512)	1-68	0.308446	0.452195	0	0	2.76538	3.25266	VASN
mitotic cell cycle phase transition (GO:0044772)	2-209	0.311788	0.455555	0	0	1.79428	2.0911	SSNA1	CDC25B
positive regulation of protein polymerization (GO:0032273)	1-69	0.312193	0.455555	0	0	2.72457	3.17177	CDC42EP4
negative regulation of viral process (GO:0048525)	1-70	0.31592	0.457792	0	0	2.68495	3.09378	BANF1
defense response to Gram-positive bacterium (GO:0050830)	1-70	0.31592	0.457792	0	0	2.68495	3.09378	CHGA
wound healing (GO:0042060)	1-70	0.31592	0.457792	0	0	2.68495	3.09378	DCBLD2
Fc-gamma receptor signaling pathway involved in phagocytosis (GO:0038096)	1-71	0.319627	0.461029	0	0	2.64646	3.01855	BRK1
positive regulation of cellular protein localization (GO:1903829)	1-71	0.319627	0.461029	0	0	2.64646	3.01855	RANGRF
translation (GO:0006412)	2-214	0.321714	0.462972	0	0	1.75151	1.98638	MRPL41	MRPL35
extrinsic apoptotic signaling pathway (GO:0097191)	1-72	0.323314	0.463146	0	0	2.60906	2.94596	MLLT11
Fc-gamma receptor signaling pathway (GO:0038094)	1-72	0.323314	0.463146	0	0	2.60906	2.94596	BRK1
response to molecule of bacterial origin (GO:0002237)	1-73	0.326982	0.464052	0	0	2.57269	2.87588	LIAS
positive regulation of JNK cascade (GO:0046330)	1-73	0.326982	0.464052	0	0	2.57269	2.87588	MTURN
neurotransmitter transport (GO:0006836)	1-73	0.326982	0.464052	0	0	2.57269	2.87588	SLC6A2
defense response to Gram-negative bacterium (GO:0050829)	1-73	0.326982	0.464052	0	0	2.57269	2.87588	CHGA
regulation of cell growth (GO:0001558)	2-217	0.327653	0.464052	0	0	1.72681	1.92677	MTPN	DCBLD2
regulation of stress fiber assembly (GO:0051492)	1-74	0.330629	0.46511	0	0	2.53732	2.8082	ARHGAP6
Fc receptor mediated stimulatory signaling pathway (GO:0002431)	1-74	0.330629	0.46511	0	0	2.53732	2.8082	BRK1
sphingolipid biosynthetic process (GO:0030148)	1-74	0.330629	0.46511	0	0	2.53732	2.8082	ASAH2
regulation of transcription from RNA polymerase II promoter in response to hypoxia (GO:0061418)	1-75	0.334257	0.469159	0	0	2.5029	2.74279	BACH1
establishment of protein localization to organelle (GO:0072594)	1-76	0.337866	0.471056	0	0	2.46941	2.67957	PEX19
regulation of RNA splicing (GO:0043484)	1-76	0.337866	0.471056	0	0	2.46941	2.67957	SF1
positive regulation of growth (GO:0045927)	1-76	0.337866	0.471056	0	0	2.46941	2.67957	MTPN
inorganic cation import across plasma membrane (GO:0098659)	1-77	0.341455	0.475002	0	0	2.43679	2.61843	SLC39A10
regulation of neuron differentiation (GO:0045664)	1-79	0.348575	0.483832	0	0	2.37407	2.50204	ZC4H2
glycerophospholipid metabolic process (GO:0006650)	1-80	0.352107	0.484437	0	0	2.3439	2.44661	FAR1
lipid biosynthetic process (GO:0008610)	1-80	0.352107	0.484437	0	0	2.3439	2.44661	NDUFAB1
regulation of NIK/NF-kappaB signaling (GO:1901222)	1-80	0.352107	0.484437	0	0	2.3439	2.44661	ADIPOR1
regulation of protein localization to plasma membrane (GO:1903076)	1-80	0.352107	0.484437	0	0	2.3439	2.44661	RANGRF
inflammatory response (GO:0006954)	2-230	0.353221	0.484904	0	0	1.62728	1.69344	ADM	LIAS
positive regulation of cellular amide metabolic process (GO:0034250)	1-81	0.35562	0.487129	0	0	2.31449	2.39293	PRR16
positive regulation of cytoskeleton organization (GO:0051495)	1-82	0.359114	0.490841	0	0	2.2858	2.34092	CDC42EP4
long-chain fatty acid metabolic process (GO:0001676)	1-83	0.362589	0.494511	0	0	2.25781	2.29051	ASAH2
regulation of cytokinesis (GO:0032465)	1-84	0.366045	0.495281	0	0	2.23049	2.24164	CDC25B
vascular transport (GO:0010232)	1-84	0.366045	0.495281	0	0	2.23049	2.24164	SLC1A5
positive regulation of transcription by RNA polymerase II (GO:0045944)	6-908	0.366558	0.495281	0	0	1.23842	1.24288	CRTC2	GAL	CRTC1	MED10	MED21	HOXD8
phosphorylation (GO:0016310)	3-400	0.367072	0.495281	0	0	1.40302	1.4061	CERK	CDC25B	MAP3K12
regulation of ERK1 and ERK2 cascade (GO:0070372)	2-238	0.368793	0.495281	0	0	1.57147	1.56758	MTURN	MAP3K12
G1/S transition of mitotic cell cycle (GO:0000082)	1-85	0.369483	0.495281	0	0	2.20383	2.19424	BACH1
regulation of cell cycle G2/M phase transition (GO:1902749)	1-85	0.369483	0.495281	0	0	2.20383	2.19424	SSNA1
positive regulation of protein catabolic process (GO:0045732)	1-85	0.369483	0.495281	0	0	2.20383	2.19424	C4BPA
negative regulation of cellular amide metabolic process (GO:0034249)	1-86	0.372902	0.496674	0	0	2.17779	2.14826	PAIP2
transport across blood-brain barrier (GO:0150104)	1-86	0.372902	0.496674	0	0	2.17779	2.14826	SLC1A5
regulation of neuron death (GO:1901214)	1-86	0.372902	0.496674	0	0	2.17779	2.14826	CHGA
protein targeting to membrane (GO:0006612)	1-87	0.376303	0.496974	0	0	2.15236	2.10363	PEX19
regulation of transcription from RNA polymerase II promoter in response to stress (GO:0043618)	1-87	0.376303	0.496974	0	0	2.15236	2.10363	BACH1
calcium ion transmembrane transport (GO:0070588)	1-87	0.376303	0.496974	0	0	2.15236	2.10363	SLC25A23
sodium ion transmembrane transport (GO:0035725)	1-87	0.376303	0.496974	0	0	2.15236	2.10363	SLC6A2
negative regulation of binding (GO:0051100)	1-88	0.379686	0.500386	0	0	2.12751	2.06031	PEX19
protein import (GO:0017038)	1-89	0.38305	0.503759	0	0	2.10323	2.01824	PEX19
negative regulation of protein kinase activity (GO:0006469)	1-90	0.386397	0.504978	0	0	2.07949	1.97737	GSKIP
sodium ion transport (GO:0006814)	1-90	0.386397	0.504978	0	0	2.07949	1.97737	SLC6A2
negative regulation of translation (GO:0017148)	1-90	0.386397	0.504978	0	0	2.07949	1.97737	PAIP2
positive regulation of supramolecular fiber organization (GO:1902905)	1-91	0.389725	0.508266	0	0	2.05628	1.93766	CDC42EP4
cellular protein metabolic process (GO:0044267)	3-417	0.392011	0.510184	0	0	1.34424	1.25883	MRPL41	MRPL35	CHGB
regulation of lipid metabolic process (GO:0019216)	1-92	0.393036	0.510457	0	0	2.03358	1.89907	ADIPOR1
organelle organization (GO:0006996)	3-420	0.396389	0.513746	0	0	1.33436	1.23476	CHGA	ALAS1	PEX19
negative regulation of cell death (GO:0060548)	1-94	0.399603	0.515777	0	0	1.98965	1.82507	CHGA
negative regulation of cellular protein metabolic process (GO:0032269)	1-94	0.399603	0.515777	0	0	1.98965	1.82507	PAIP2
cellular transition metal ion homeostasis (GO:0046916)	1-96	0.406101	0.523084	0	0	1.94757	1.75506	SLC39A10
positive regulation of cell differentiation (GO:0045597)	2-258	0.407057	0.52324	0	0	1.44723	1.30077	PPP1R13L	ZC4H2
protein maturation (GO:0051604)	1-97	0.409323	0.524001	0	0	1.92718	1.72145	NDUFAB1
positive regulation of cold-induced thermogenesis (GO:0120162)	1-97	0.409323	0.524001	0	0	1.92718	1.72145	ADIPOR1
negative regulation of neuron death (GO:1901215)	1-98	0.412528	0.527026	0	0	1.90722	1.68875	CHGA
positive regulation of stress-activated MAPK cascade (GO:0032874)	1-99	0.415716	0.52894	0	0	1.88766	1.6569	MTURN
organic anion transport (GO:0015711)	1-99	0.415716	0.52894	0	0	1.88766	1.6569	HBA1
regulation of transforming growth factor beta receptor signaling pathway (GO:0017015)	1-100	0.418887	0.530817	0	0	1.8685	1.62588	VASN
positive regulation of translation (GO:0045727)	1-100	0.418887	0.530817	0	0	1.8685	1.62588	PRR16
regulation of intracellular signal transduction (GO:1902531)	3-437	0.421037	0.53126	0	0	1.28097	1.10809	PLEKHG2	PPP1R13L	ARHGAP6
positive regulation of cell cycle process (GO:0090068)	1-101	0.422041	0.53126	0	0	1.84972	1.59567	CDC25B
positive regulation of protein localization to membrane (GO:1905477)	1-101	0.422041	0.53126	0	0	1.84972	1.59567	RANGRF
positive regulation of cell growth (GO:0030307)	1-102	0.425178	0.53126	0	0	1.83131	1.56623	MTPN
positive regulation of cellular protein metabolic process (GO:0032270)	1-102	0.425178	0.53126	0	0	1.83131	1.56623	PRR16
regulation of cell death (GO:0010941)	1-102	0.425178	0.53126	0	0	1.83131	1.56623	HBA1
regulation of protein catabolic process (GO:0042176)	1-102	0.425178	0.53126	0	0	1.83131	1.56623	C4BPA
chromatin remodeling (GO:0006338)	1-103	0.428298	0.534092	0	0	1.81327	1.53754	NPM3
regulation of insulin secretion (GO:0050796)	1-104	0.431401	0.536893	0	0	1.79557	1.50957	CHGA
regulation of JNK cascade (GO:0046328)	1-105	0.434487	0.539661	0	0	1.77822	1.4823	MTURN
positive regulation of MAPK cascade (GO:0043410)	2-274	0.436865	0.540402	0	0	1.36099	1.12708	MTURN	MAP3K12
peptidyl-lysine modification (GO:0018205)	1-106	0.437557	0.540402	0	0	1.76119	1.45571	NDUFAB1
positive regulation of cellular process (GO:0048522)	4-625	0.437674	0.540402	0	0	1.19355	0.986204	MTPN	PPP1R13L	HBA1	CDC25B
negative regulation of transmembrane receptor protein serine/threonine kinase signaling pathway (GO:0090101)	1-108	0.443648	0.5467	0	0	1.7281	1.40447	VASN
regulation of protein kinase activity (GO:0045859)	1-110	0.449673	0.553035	0	0	1.69622	1.35568	GSKIP
regulation of Wnt signaling pathway (GO:0030111)	1-111	0.452661	0.554532	0	0	1.68071	1.33215	GSKIP
cellular divalent inorganic cation homeostasis (GO:0072503)	1-111	0.452661	0.554532	0	0	1.68071	1.33215	SLC39A10
positive regulation of metabolic process (GO:0009893)	1-113	0.458589	0.55864	0	0	1.65053	1.28676	ADIPOR1
sulfur compound biosynthetic process (GO:0044272)	1-113	0.458589	0.55864	0	0	1.65053	1.28676	LIAS
positive regulation of programmed cell death (GO:0043068)	2-286	0.458691	0.55864	0	0	1.30268	1.01528	MLLT11	PLEKHG2
positive regulation of cellular component organization (GO:0051130)	1-114	0.461529	0.558834	0	0	1.63584	1.26485	BRK1
response to lipid (GO:0033993)	1-114	0.461529	0.558834	0	0	1.63584	1.26485	LIAS
histone modification (GO:0016570)	1-114	0.461529	0.558834	0	0	1.63584	1.26485	MAP3K12
regulation of protein-containing complex assembly (GO:0043254)	1-116	0.467362	0.564805	0	0	1.60723	1.22254	BRK1
positive regulation of cell projection organization (GO:0031346)	1-117	0.470255	0.567206	0	0	1.5933	1.20211	TENM3
adenylate cyclase-activating G protein-coupled receptor signaling pathway (GO:0007189)	1-118	0.473133	0.568486	0	0	1.5796	1.18214	ADM
positive regulation of protein-containing complex assembly (GO:0031334)	1-118	0.473133	0.568486	0	0	1.5796	1.18214	BRK1
macroautophagy (GO:0016236)	1-120	0.478841	0.574243	0	0	1.55289	1.14353	FUNDC1
protein homooligomerization (GO:0051260)	1-121	0.481673	0.576533	0	0	1.53988	1.12486	SLC1A5
negative regulation of cell growth (GO:0030308)	1-126	0.495602	0.589823	0	0	1.47791	1.03746	DCBLD2
negative regulation of growth (GO:0045926)	1-126	0.495602	0.589823	0	0	1.47791	1.03746	DCBLD2
circulatory system development (GO:0072359)	1-126	0.495602	0.589823	0	0	1.47791	1.03746	BORCS8
positive regulation of apoptotic process (GO:0043065)	2-310	0.500853	0.59407	0	0	1.19971	0.829528	MLLT11	PLEKHG2
microtubule cytoskeleton organization involved in mitosis (GO:1902850)	1-128	0.501069	0.59407	0	0	1.45449	1.00507	SPC24
positive regulation of canonical Wnt signaling pathway (GO:0090263)	1-130	0.506478	0.598217	0	0	1.43179	0.974011	GSKIP
regulation of primary metabolic process (GO:0080090)	1-130	0.506478	0.598217	0	0	1.43179	0.974011	ADIPOR1
cilium assembly (GO:0060271)	2-314	0.507676	0.598503	0	0	1.18408	0.802704	SSNA1	FBF1
cellular response to hypoxia (GO:0071456)	1-131	0.50916	0.599124	0	0	1.4207	0.958965	BACH1
negative regulation of gene expression (GO:0010629)	2-322	0.521142	0.610066	0	0	1.15401	0.752105	ZC3H10	PAIP2
protein localization to plasma membrane (GO:0072659)	1-136	0.522357	0.610066	0	0	1.36774	0.888215	MAP7
negative regulation of inflammatory response to antigenic stimulus (GO:0002862)	1-136	0.522357	0.610066	0	0	1.36774	0.888215	ADM
ribonucleoprotein complex assembly (GO:0022618)	1-136	0.522357	0.610066	0	0	1.36774	0.888215	SF1
regulation of inflammatory response to antigenic stimulus (GO:0002861)	1-137	0.524954	0.611958	0	0	1.35761	0.874907	ADM
protein dephosphorylation (GO:0006470)	1-139	0.530106	0.616815	0	0	1.3378	0.849075	PTPN14
protein localization to cell periphery (GO:1990778)	1-140	0.532661	0.618638	0	0	1.32811	0.836537	MAP7
chromatin organization (GO:0006325)	1-142	0.53773	0.623369	0	0	1.30914	0.812188	NPM3
neuron development (GO:0048666)	1-143	0.540244	0.623972	0	0	1.29986	0.800365	TENM3
monocarboxylic acid metabolic process (GO:0032787)	1-143	0.540244	0.623972	0	0	1.29986	0.800365	CKM
negative regulation of cell migration (GO:0030336)	1-144	0.542745	0.625706	0	0	1.2907	0.788767	ADIPOR1
negative regulation of protein phosphorylation (GO:0001933)	1-152	0.56227	0.647024	0	0	1.22182	0.703492	GSKIP
dephosphorylation (GO:0016311)	1-153	0.564652	0.647385	0	0	1.21372	0.693698	PTPN14
positive regulation of Wnt signaling pathway (GO:0030177)	1-153	0.564652	0.647385	0	0	1.21372	0.693698	GSKIP
positive regulation of NF-kappaB transcription factor activity (GO:0051092)	1-155	0.569377	0.650722	0	0	1.19784	0.674637	MTPN
regulation of signal transduction by p53 class mediator (GO:1901796)	1-156	0.571721	0.650722	0	0	1.19005	0.665363	PPP1R13L
regulation of cell differentiation (GO:0045595)	1-156	0.571721	0.650722	0	0	1.19005	0.665363	PPP1R13L
peptidyl-serine phosphorylation (GO:0018105)	1-156	0.571721	0.650722	0	0	1.19005	0.665363	MAP3K12
mitotic spindle organization (GO:0007052)	1-157	0.574052	0.652189	0	0	1.18236	0.656254	SPC24
gene expression (GO:0010467)	2-356	0.575606	0.652455	0	0	1.04136	0.575176	MRPL41	MRPL35
organonitrogen compound biosynthetic process (GO:1901566)	1-158	0.57637	0.652455	0	0	1.17477	0.647306	ALAS1
response to lipopolysaccharide (GO:0032496)	1-159	0.578676	0.652705	0	0	1.16728	0.638516	LIAS
protein autophosphorylation (GO:0046777)	1-159	0.578676	0.652705	0	0	1.16728	0.638516	MAP3K12
heart development (GO:0007507)	1-164	0.59002	0.664303	0	0	1.13119	0.596813	BORCS8
adenylate cyclase-modulating G protein-coupled receptor signaling pathway (GO:0007188)	1-165	0.592252	0.664426	0	0	1.12423	0.588898	ADM
regulation of neuron projection development (GO:0010975)	1-165	0.592252	0.664426	0	0	1.12423	0.588898	TENM3
peptidyl-serine modification (GO:0018209)	1-169	0.601061	0.673102	0	0	1.09724	0.55856	MAP3K12
defense response to bacterium (GO:0042742)	1-176	0.616025	0.688628	0	0	1.05298	0.510133	CHGA
glycerophospholipid biosynthetic process (GO:0046474)	1-177	0.618117	0.689735	0	0	1.04694	0.50366	FAR1
negative regulation of immune response (GO:0050777)	1-178	0.620198	0.690672	0	0	1.04097	0.497291	ADM
protein stabilization (GO:0050821)	1-179	0.622267	0.690672	0	0	1.03507	0.491024	PEX19
regulation of immune response (GO:0050776)	1-179	0.622267	0.690672	0	0	1.03507	0.491024	NPDC1
positive regulation of cellular biosynthetic process (GO:0031328)	1-180	0.624325	0.69173	0	0	1.02924	0.484858	PRR16
endoplasmic reticulum to Golgi vesicle-mediated transport (GO:0006888)	1-185	0.634451	0.701707	0	0	1.00102	0.455458	RANGRF
regulation of mitotic cell cycle phase transition (GO:1901990)	1-188	0.640396	0.707033	0	0	0.984807	0.438898	SSNA1
protein localization to membrane (GO:0072657)	1-195	0.653897	0.720668	0	0	0.948935	0.403113	MAP7
negative regulation of intracellular signal transduction (GO:1902532)	1-198	0.659529	0.725597	0	0	0.934342	0.388901	ADIPOR1
regulation of macromolecule metabolic process (GO:0060255)	1-200	0.663232	0.728392	0	0	0.924858	0.379774	ATXN7L3B
generation of neurons (GO:0048699)	1-202	0.666896	0.731133	0	0	0.915562	0.370913	MTPN
negative regulation of inflammatory response (GO:0050728)	1-212	0.684632	0.747957	0	0	0.871728	0.330275	ADM
phosphate-containing compound metabolic process (GO:0006796)	1-212	0.684632	0.747957	0	0	0.871728	0.330275	CERK
extracellular structure organization (GO:0043062)	1-216	0.691461	0.754102	0	0	0.855336	0.315575	LAMA1
external encapsulating structure organization (GO:0045229)	1-217	0.693145	0.754624	0	0	0.851333	0.312027	LAMA1
positive regulation of cell motility (GO:2000147)	1-221	0.699792	0.760538	0	0	0.835684	0.298316	MIEN1
cilium organization (GO:0044782)	1-228	0.711082	0.771468	0	0	0.809626	0.276056	FBF1
regulation of cellular macromolecule biosynthetic process (GO:2000112)	2-468	0.722709	0.782727	0	0	0.786541	0.255428	MTPN	BACH1
membrane organization (GO:0061024)	1-242	0.732415	0.791868	0	0	0.762051	0.237309	CNTN2
anterograde trans-synaptic signaling (GO:0098916)	1-244	0.735332	0.793652	0	0	0.755702	0.232327	SLC6A2
cellular response to cytokine stimulus (GO:0071345)	2-482	0.737745	0.794885	0	0	0.76305	0.232088	ASAH2	PTPN14
negative regulation of apoptotic process (GO:0043066)	2-485	0.740876	0.796887	0	0	0.758194	0.227399	ASAH2	MIEN1
RNA splicing, via transesterification reactions with bulged adenosine as nucleophile (GO:0000377)	1-251	0.745297	0.800268	0	0	0.73428	0.215858	SF1
regulation of canonical Wnt signaling pathway (GO:0060828)	1-253	0.748075	0.801875	0	0	0.728379	0.211413	GSKIP
protein phosphorylation (GO:0006468)	2-496	0.752087	0.804798	0	0	0.740891	0.211082	CDC25B	MAP3K12
negative regulation of signal transduction (GO:0009968)	1-267	0.7667	0.817569	0	0	0.689551	0.183186	ASAH2
positive regulation of nucleic acid-templated transcription (GO:1903508)	2-511	0.766709	0.817569	0	0	0.718501	0.190869	MLLT11	MAP3K12
regulation of apoptotic process (GO:0042981)	3-742	0.769197	0.817569	0	0	0.740499	0.194313	MLLT11	PLEKHG2	MIEN1
positive regulation of cell migration (GO:0030335)	1-269	0.769247	0.817569	0	0	0.684335	0.179531	MIEN1
inorganic cation transmembrane transport (GO:0098662)	1-274	0.775494	0.82142	0	0	0.671631	0.170766	SLC6A2
mRNA splicing, via spliceosome (GO:0000398)	1-274	0.775494	0.82142	0	0	0.671631	0.170766	SF1
DNA metabolic process (GO:0006259)	1-277	0.779161	0.823798	0	0	0.664229	0.16575	BACH1
plasma membrane bounded cell projection assembly (GO:0120031)	1-278	0.78037	0.823798	0	0	0.661797	0.164117	FBF1
negative regulation of cellular macromolecule biosynthetic process (GO:2000113)	2-547	0.798803	0.841836	0	0	0.669794	0.150463	TCEAL7	PAIP2
regulation of cell cycle (GO:0051726)	1-296	0.801049	0.842784	0	0	0.620846	0.137724	ASAH2
DNA repair (GO:0006281)	1-298	0.803224	0.843085	0	0	0.616602	0.135111	BACH1
extracellular matrix organization (GO:0030198)	1-300	0.805375	0.843085	0	0	0.612415	0.132555	LAMA1
mRNA processing (GO:0006397)	1-300	0.805375	0.843085	0	0	0.612415	0.132555	SF1
innate immune response (GO:0045087)	1-302	0.807504	0.843902	0	0	0.608284	0.130056	CHGA
cellular protein modification process (GO:0006464)	4-1025	0.81038	0.845455	0	0	0.710879	0.149464	PTPN14	CHGB	CDC25B	MAP3K12
chemical synaptic transmission (GO:0007268)	1-306	0.811691	0.845455	0	0	0.600184	0.12522	SLC6A2
negative regulation of cellular process (GO:0048523)	2-566	0.814133	0.84659	0	0	0.646594	0.13296	PTPN14	DCBLD2
cellular protein localization (GO:0034613)	1-329	0.834075	0.865888	0	0	0.557442	0.101138	CNTN2
intracellular protein transport (GO:0006886)	1-336	0.840348	0.870957	0	0	0.545599	0.0949009	RANGRF
positive regulation of multicellular organismal process (GO:0051240)	1-345	0.84807	0.876059	0	0	0.53108	0.0875177	ADIPOR1
post-translational protein modification (GO:0043687)	1-345	0.84807	0.876059	0	0	0.53108	0.0875177	CHGB
cellular response to DNA damage stimulus (GO:0006974)	1-350	0.852199	0.878874	0	0	0.523338	0.0837001	BACH1
regulation of transcription by RNA polymerase II (GO:0006357)	9-6	0.855016	0.880329	0	0	0.732197	0.114688	CRTC2	GAL	CRTC1	PPP1R13L	ZFP3	MED10	MED21	BACH1	HOXD8
protein transport (GO:0015031)	1-369	0.8669	0.891099	0	0	0.495835	0.0708212	VLDLR
negative regulation of cell population proliferation (GO:0008285)	1-379	0.874045	0.896919	0	0	0.48247	0.0649519	PTPN14
negative regulation of programmed cell death (GO:0043069)	1-381	0.875428	0.896919	0	0	0.479882	0.0638448	MIEN1
positive regulation of macromolecule metabolic process (GO:0010604)	1-384	0.877474	0.897547	0	0	0.47605	0.0622236	MTPN
transmembrane receptor protein tyrosine kinase signaling pathway (GO:0007169)	1-404	0.890288	0.909169	0	0	0.451961	0.0525223	BRK1
regulation of cell migration (GO:0030334)	1-408	0.892687	0.909256	0	0	0.447427	0.0507914	MIEN1
protein modification by small protein conjugation (GO:0032446)	1-409	0.893279	0.909256	0	0	0.446307	0.0503687	URM1
organelle assembly (GO:0070925)	1-425	0.902316	0.916964	0	0	0.429113	0.0441088	FBF1
regulation of nucleic acid-templated transcription (GO:1903506)	1-430	0.904981	0.918182	0	0	0.424003	0.0423329	BACH1
negative regulation of nucleic acid-templated transcription (GO:1903507)	1-464	0.92129	0.932163	0	0	0.39218	0.0321509	TCEAL7
regulation of cell population proliferation (GO:0042127)	2-764	0.92174	0.932163	0	0	0.473679	0.0386012	PTPN14	CDC25B
positive regulation of cell population proliferation (GO:0008284)	1-474	0.925536	0.934493	0	0	0.383691	0.029691	CDC25B
[truncated: 6 more rows]

## Sheet: Down CC_THC
Term	Overlap	P-value	Adjusted P-value	Old P-value	Old Adjusted P-value	Odds Ratio	Combined Score	Genes
[truncated: 87 more rows]

[truncated: 7 more sheets: KEGG Up_THC, Up BP_THC, Up CC_THC, Venn KEGG pathways, Venn BP, Venn CC, CBD_THC_DEPs_Upset plot]
