# Supplementary material for: Proteome-Wide Profiling Using Sample Multiplexing of a Human Cell Line Treated with Cannabidiol (CBD) and Tetrahydrocannabinol (THC)
Source: Proteomes. 2023 Nov 2;11(4):36. doi: 10.3390/proteomes11040036 (PMC10661330; doi:10.3390/proteomes11040036)
Supplement: Supplementary file 1 [file proteomes-11-00036-s001.zip › Abyadeh TableS1.xlsx]

## Sheet: Sheet2
Table S1: Proteins identified in the dataset. Columns include: Uniprot protein ID, gene name, protein description, number of peptides matched to these proteins and the TMT signal-to-noise values for all 9 samples.
Protein Id	Gene Name	Description	No. of peptides	normalized TMT summed signal-to-noise
				MeOH_1	MeOH_2	MeOH_3	CBD_1	CBD_2	CBD_3	THC_1	THC_2	THC_3
				131	131c	132n	132c	133n	133c	134n	134c	135
sp|P55011|S12A2_HUMAN	SLC12A2	Solute carrier family 12 member 2	29	2959.56	2994.32	2984.38	2905.33	2884.42	2902.63	2810.12	2832.21	2849.48
sp|Q76L83|ASXL2_HUMAN	ASXL2	Putative Polycomb group protein ASXL2	6	472.481	488.871	473.711	459.903	464.956	468.244	467.785	450.555	448.611
sp|O14813|PHX2A_HUMAN	PHOX2A	Paired mesoderm homeobox protein 2A	18	6983.03	6974.75	6780.9	6191.03	6179.17	6242.4	6424.68	6397.52	6434.72
sp|Q99453|PHX2B_HUMAN	PHOX2B	Paired mesoderm homeobox protein 2B	13	2643.43	2662.08	2595.65	2215.05	2294.44	2203.11	2509.33	2513.41	2535.62
sp|Q9Y4H2|IRS2_HUMAN	IRS2	Insulin receptor substrate 2	23	2969.24	3014.03	2943.7	2760.46	2739.05	2769.88	2848.22	2905.97	2827.26
sp|A8MW92-2|P20L1_HUMAN	PHF20L1	Isoform 2 of PHD finger protein 20-like protein 1	6	728.821	766.392	755.293	765.507	777.311	734.086	726.633	721.623	715.129
sp|O94921|CDK14_HUMAN	CDK14	Cyclin-dependent kinase 14	2	63.8374	62.7168	66.6285	61.679	75.2522	63.5098	51.3914	53.005	58.5592
sp|P06493|CDK1_HUMAN	CDK1	Cyclin-dependent kinase 1	56	8018.35	8081.98	7937.46	8381.36	8282.16	8390.09	8560.24	8423.22	8417.87
sp|P07947|YES_HUMAN	YES1	Tyrosine-protein kinase Yes	16	859.355	884.891	906.614	921.586	906.51	889.72	879.789	899.431	900.673
sp|P07948|LYN_HUMAN	LYN	Tyrosine-protein kinase Lyn	35	7712.18	7606.98	7537.78	8292.5	8316.84	8282.67	7756.84	7723.88	7630.97
sp|P07948-2|LYN_HUMAN	LYN	Isoform 2 of Tyrosine-protein kinase Lyn	1	548.863	532.433	544.046	571.559	602.004	577.095	556.136	546.015	572.285
sp|P08581-2|MET_HUMAN	MET	Isoform 2 of Hepatocyte growth factor receptor	12	119.369	136.969	164.996	152.503	155.215	129.078	141.745	146.836	158.845
sp|P11362-21|FGFR1_HUMAN	FGFR1	Isoform 21 of Fibroblast growth factor receptor 1	4	115.305	120.823	116.28	146.446	128.527	135.896	115.314	113.973	116.677
sp|P11802|CDK4_HUMAN	CDK4	Cyclin-dependent kinase 4	11	2237.5	2214.05	2136.38	2135.35	2226.45	2193.24	2246.54	2228.88	2219.01
sp|P12931-2|SRC_HUMAN	SRC	Isoform 2 of Proto-oncogene tyrosine-protein kinase Src	23	2247.74	2230.23	2247.51	2688.82	2680.54	2627.07	2535.87	2619.14	2620.96
sp|P22455|FGFR4_HUMAN	FGFR4	Fibroblast growth factor receptor 4	11	90.9779	98.2325	91.3013	90.804	84.5271	88.3953	94.7723	91.5793	89.094
sp|P22607-2|FGFR3_HUMAN	FGFR3	Isoform 2 of Fibroblast growth factor receptor 3	2	5.31838	4.72969	4.24716	8.35472	8.181	3.46297	4.1212	7.56039	8.49723
sp|P24941|CDK2_HUMAN	CDK2	Cyclin-dependent kinase 2	27	3763.03	3743.89	3785.32	3788.35	3851.07	3766.27	3878.33	3914.2	3929.35
sp|P41240|CSK_HUMAN	CSK	Tyrosine-protein kinase CSK	37	6112.29	6001.45	5974.69	6068.96	6030.4	6002.02	6104.54	6004.68	6039.34
sp|P42685|FRK_HUMAN	FRK	Tyrosine-protein kinase FRK	1	140.037	145.713	135.998	123.969	127.807	134.447	151.485	142.384	125.155
sp|P50750-2|CDK9_HUMAN	CDK9	Isoform 2 of Cyclin-dependent kinase 9	15	1798.75	1839.9	1857.84	1875.67	1840.83	1833.07	1852.71	1902.28	1885.49
sp|P51451|BLK_HUMAN	BLK	Tyrosine-protein kinase Blk	1	20.5643	19.1826	23.1094	15.0123	19.0805	18.9075	20.1395	17.7758	17.5178
sp|Q00534|CDK6_HUMAN	CDK6	Cyclin-dependent kinase 6	32	3706.27	3482.65	3568.58	3583.79	3658.46	3495.46	3737.04	3587.7	3667.18
sp|Q00535|CDK5_HUMAN	CDK5	Cyclin-dependent-like kinase 5	18	3251.71	3311.73	3285.31	3210.71	3230.25	3143.64	3321.82	3311.95	3255.17
sp|Q00536-2|CDK16_HUMAN	CDK16	Isoform 2 of Cyclin-dependent kinase 16	6	326.082	322.641	346.838	345.938	324.433	327.842	307.025	314.525	297.009
sp|Q00537-2|CDK17_HUMAN	CDK17	Isoform 2 of Cyclin-dependent kinase 17	7	377.407	370.812	384.561	363.409	367.002	364.965	362.378	349.512	356.132
sp|Q07002-3|CDK18_HUMAN	CDK18	Isoform 2 of Cyclin-dependent kinase 18	4	73.4108	79.3525	79.1775	70.2849	72.8581	74.0984	64.5829	72.1936	74.5327
sp|Q13043|STK4_HUMAN	STK4	Serine/threonine-protein kinase 4	27	3406.46	3423.87	3445.83	3559.84	3483.26	3472.34	3379.37	3388.4	3387.43
sp|Q13188-2|STK3_HUMAN	STK3	Isoform 2 of Serine/threonine-protein kinase 3	16	2835.25	2773.43	2805.58	2782.08	2815.19	2784.73	2648.69	2748.35	2734.49
sp|Q14004|CDK13_HUMAN	CDK13	Cyclin-dependent kinase 13	23	2273.25	2223.53	2199.29	2247.74	2233.24	2278.08	2117.33	2162.93	2127.56
sp|Q9NYV4|CDK12_HUMAN	CDK12	Cyclin-dependent kinase 12	31	2670.13	2693.79	2748.05	2694.96	2660.29	2704.52	2587.36	2572.55	2586.19
tr|A0A0A0MQS0|A0A0A0MQS0_HUMAN	PHF20L1	PHD finger protein 20-like protein 1	5	355.612	348.022	334.478	330.712	337.709	357.022	304.711	330.116	339.592
sp|P36578|RL4_HUMAN	RPL4	60S ribosomal protein L4	92	16959.6	16985.5	17011.4	17578.7	17779.1	17568.8	16818.5	16357.6	16495.9
sp|Q92945|FUBP2_HUMAN	KHSRP	Far upstream element-binding protein 2	95	14678.5	14784.1	14651.2	14469.4	14560.1	14544	14496	14440.1	14426.1
sp|Q96AE4|FUBP1_HUMAN	FUBP1	Far upstream element-binding protein 1	12	709.79	691.1	689.585	744.496	752.121	774.894	719.246	692.248	733.923
sp|Q96AE4-2|FUBP1_HUMAN	FUBP1	Isoform 2 of Far upstream element-binding protein 1	104	15804.4	15884.9	15729.7	15875.3	15998.8	15744.8	15542.5	15844.7	15661.8
sp|Q96I24|FUBP3_HUMAN	FUBP3	Far upstream element-binding protein 3	63	8657.79	8548.79	8455.86	8710.64	8570	8613.62	8433.01	8352.7	8404.84
sp|O76031|CLPX_HUMAN	CLPX	ATP-dependent Clp protease ATP-binding subunit clpX-like, mitochondrial	70	11459.7	11299.8	11499.3	10830.8	10992	10942	11006.3	11155.6	11152
sp|O15265-2|ATX7_HUMAN	ATXN7	Isoform b of Ataxin-7	5	191.807	184.206	192.997	192.603	186.265	168.563	179.397	200.192	184.532
sp|Q9ULW3|ABT1_HUMAN	ABT1	Activator of basal transcription 1	27	1366.32	1339.5	1364.16	1424.15	1442.04	1405.98	1338.42	1377.15	1383.35
sp|Q8WUQ7-2|CATIN_HUMAN	CACTIN	Isoform 2 of Cactin	32	3672.12	3647.48	3601.68	3551.12	3449.88	3557.61	3432.27	3570.05	3545.77
sp|P82914|RT15_HUMAN	MRPS15	28S ribosomal protein S15, mitochondrial	18	3120.84	3128.67	3110.42	3158.92	3137.69	3105.24	3055.19	3178	3098.06
sp|Q9BTD8|RBM42_HUMAN	RBM42	RNA-binding protein 42	19	1002.29	999.593	998.524	958.32	947.526	967.15	941.542	967.945	926.128
sp|Q9P258|RCC2_HUMAN	RCC2	Protein RCC2	75	15611.1	15588.5	15371.7	14907.8	15150.5	14970.7	15755.6	15691.3	15730.6
sp|Q9H3U1|UN45A_HUMAN	UNC45A	Protein unc-45 homolog A	68	9545.29	9563.9	9481.11	9302.47	9274.44	9288.89	9307.05	9353.91	9355.74
sp|P30044|PRDX5_HUMAN	PRDX5	Peroxiredoxin-5, mitochondrial	60	12387.3	12262.4	12255.2	11510.7	11792.5	11595.9	12040.3	11989.8	12108.6
sp|Q15596|NCOA2_HUMAN	NCOA2	Nuclear receptor coactivator 2	31	2488.91	2483.87	2462.66	2461.04	2514.96	2565.53	2440.82	2390.97	2457.96
sp|Q15788|NCOA1_HUMAN	NCOA1	Nuclear receptor coactivator 1	9	350.146	349.434	346.929	340.746	334.744	344.409	323.611	304.536	325.624
sp|Q53GG5-2|PDLI3_HUMAN	PDLIM3	Isoform 2 of PDZ and LIM domain protein 3	21	2440.95	2382.25	2381.84	2298.57	2381.69	2296.18	2235.73	2263.92	2242.15
sp|Q9UPT8|ZC3H4_HUMAN	ZC3H4	Zinc finger CCCH domain-containing protein 4	37	6301.86	6342.31	6402.56	6266.54	6398.69	6442.76	6094.57	6181.12	6239.79
sp|Q6ZTU2-6|E400N_HUMAN	EP400P1	Isoform 5 of Putative EP400-like protein	1	18.0696	12.8024	16.4717	20.982	24.6827	21.9166	20.0633	21.8792	19.8781
sp|Q96L91-5|EP400_HUMAN	EP400	Isoform 5 of E1A-binding protein p400	56	5545.36	5520.38	5508.49	5677.13	5604.34	5673.33	5567.81	5553.65	5610.78
sp|P52701|MSH6_HUMAN	MSH6	DNA mismatch repair protein Msh6	111	19242.8	19020.2	18703.5	19467.1	19311.8	19499.8	19814.6	19922.3	19775.4
sp|A1X283|SPD2B_HUMAN	SH3PXD2B	SH3 and PX domain-containing protein 2B	43	5682.95	5679.74	5532.81	5515.39	5380.6	5321.82	5410.77	5384.35	5445.94
sp|Q5TCZ1|SPD2A_HUMAN	SH3PXD2A	SH3 and PX domain-containing protein 2A	40	6237.91	6099.41	5943.04	6058.56	5913.71	6058.59	5946.28	5963.45	6043.89
sp|P05154|IPSP_HUMAN	SERPINA5	Plasma serine protease inhibitor	9	142.752	152.227	207.562	196.729	198.209	186.823	168.297	185.366	193.331
sp|O43815|STRN_HUMAN	STRN	Striatin	50	6782.94	6763.86	6614.63	6631.16	6667.31	6694.36	6608.36	6554.39	6405.86
sp|Q13033|STRN3_HUMAN	STRN3	Striatin-3	49	3420.51	3403.95	3458.12	3373.38	3385	3353.12	3389.92	3305.48	3361.91
sp|Q13033-2|STRN3_HUMAN	STRN3	Isoform Alpha of Striatin-3	1	54.2729	43.273	49.288	60.1677	44.2422	53.2448	47.8567	54.49	49.0299
sp|Q9NRL3-3|STRN4_HUMAN	STRN4	Isoform 3 of Striatin-4	21	2757.94	2788.84	2715.18	2697.56	2592.01	2718.62	2685.67	2649.23	2668.08
sp|Q9BQE4|SELS_HUMAN	SELENOS	Selenoprotein S	7	1272.04	1217.49	1232.46	1455.61	1445.45	1440.02	1398.69	1417.8	1442.67
sp|O14802|RPC1_HUMAN	POLR3A	DNA-directed RNA polymerase III subunit RPC1	57	4780.69	4677.9	4712.49	4824.16	4803.99	4870.88	5004.97	5012.85	4964.88
sp|O95602|RPA1_HUMAN	POLR1A	DNA-directed RNA polymerase I subunit RPA1	68	6292.84	6238.81	6344.59	6457.77	6484.9	6524.21	6525.83	6484.78	6469.11
sp|Q8N8D1|PDCD7_HUMAN	PDCD7	Programmed cell death protein 7	5	401.179	432.794	420.934	407.283	427.519	445.749	421.669	426.697	436.019
sp|P59768|GBG2_HUMAN	GNG2	Guanine nucleotide-binding protein G(I)/G(S)/G(O) subunit gamma-2	7	1692.43	1703.79	1663.47	1610.66	1555.49	1565.03	1567.89	1551.37	1551.38
sp|O95159|ZFPL1_HUMAN	ZFPL1	Zinc finger protein-like 1	14	755.457	757.101	761.347	847.705	810.659	856.236	754.752	750.041	764.231
sp|Q6P2E9|EDC4_HUMAN	EDC4	Enhancer of mRNA-decapping protein 4	85	7150.77	7210.58	7162.98	7249.63	6994.89	7199.59	7337.81	7177.59	7196.64
sp|Q9NQP4|PFD4_HUMAN	PFDN4	Prefoldin subunit 4	13	1659.47	1646.93	1652.62	1552.26	1531.98	1544.18	1635.47	1589.39	1602.32
sp|O95551-2|TYDP2_HUMAN	TDP2	Isoform 2 of Tyrosyl-DNA phosphodiesterase 2	8	1128.48	1148.48	1166	1122.59	1113.53	1139.97	1195.93	1193.34	1245.1
sp|O15357|SHIP2_HUMAN	INPPL1	Phosphatidylinositol 3,4,5-trisphosphate 5-phosphatase 2	34	4987.86	4952.6	4974.97	4741.19	4742.96	4694.67	4681.09	4657.91	4679.11
sp|Q6UW63|PLGT2_HUMAN	POGLUT2	Protein O-glucosyltransferase 2	31	5340.59	5347.1	5369.38	5627.82	5622.58	5684.83	5627.37	5691.64	5664.66
sp|Q92835|SHIP1_HUMAN	INPP5D	Phosphatidylinositol 3,4,5-trisphosphate 5-phosphatase 1	16	173.226	144.776	214.146	180.846	190.511	187.611	182.325	194.952	189.908
sp|Q9H9Y2|RPF1_HUMAN	RPF1	Ribosome production factor 1	15	701.909	741.407	753.668	840.763	827.898	863.106	780.263	804.562	775.296
sp|Q96P70|IPO9_HUMAN	IPO9	Importin-9	75	10471	10308.6	10287.6	9719.21	9688.28	9780.52	10202.2	10201.1	10136.1
sp|P30260-2|CDC27_HUMAN	CDC27	Isoform 2 of Cell division cycle protein 27 homolog	33	4409.93	4423.21	4445.46	4692.85	4672.89	4645.55	4568.25	4489.33	4533.79
sp|O15042|SR140_HUMAN	U2SURP	U2 snRNP-associated SURP motif-containing protein	63	6908.69	6792.57	6857.58	6731.68	6752.49	6850.86	6759.01	6807.05	6723.46
sp|Q9NP50|SHCAF_HUMAN	SINHCAF	SIN3-HDAC complex-associated factor	12	1451.98	1456.37	1459.69	1552.84	1567.23	1545.3	1491.32	1525.42	1528.43
sp|Q01780|EXOSX_HUMAN	EXOSC10	Exosome component 10	93	16542.3	16388.8	16495.5	16885.3	16875.1	16752	16695.9	16595	16850.2
sp|O15405|TOX3_HUMAN	TOX3	TOX high mobility group box family member 3	1	0	0	2.96761	2.78187	2.25228	2.9335	5.66526	0	2.50194
sp|O94842|TOX4_HUMAN	TOX4	TOX high mobility group box family member 4	23	5201.69	5239.9	5097.12	5320.57	5264.29	5327.02	5041.56	5190.23	5130.65
sp|O94900|TOX_HUMAN	TOX	Thymocyte selection-associated high mobility group box protein TOX	6	247.492	243.848	242.125	236.882	228.146	227.281	219.065	215.044	214.811
sp|P02786|TFR1_HUMAN	TFRC	Transferrin receptor protein 1	80	8641.4	8638.36	8900.73	8426.44	8232.6	8357.29	7395.75	7518.64	7442.24
sp|Q9UP52|TFR2_HUMAN	TFR2	Transferrin receptor protein 2	6	937.215	985.102	985.719	924.075	960.036	906.229	850.946	880.875	840.319
sp|P07954|FUMH_HUMAN	FH	Fumarate hydratase, mitochondrial	69	11491.4	11473.3	11365.9	11228.2	11206.1	11140.1	11226.2	11136.7	11056.2
sp|P18621-3|RL17_HUMAN	RPL17	Isoform 3 of 60S ribosomal protein L17	11	1174.18	1182.29	1168.58	1304.22	1325.6	1340.44	1218.77	1242.87	1155.44
sp|Q9Y490|TLN1_HUMAN	TLN1	Talin-1	153	25183.3	25388.9	25018	24835.8	24790.4	24889.5	25196.9	25425	25404.6
sp|Q9Y4G6|TLN2_HUMAN	TLN2	Talin-2	133	19124	19248.4	19032.2	18681.3	18718.4	18739.7	18970.9	18949.9	19168.5
sp|O94826|TOM70_HUMAN	TOMM70	Mitochondrial import receptor subunit TOM70	85	13983.3	13980.9	13885.9	13883.6	13826.8	13891.5	13724.8	13877.2	13816.7
sp|Q96L58|B3GT6_HUMAN	B3GALT6	Beta-1,3-galactosyltransferase 6	14	755.501	704.15	689.99	674.139	690.599	683.273	662.817	711.386	699.113
sp|Q9P0V3|SH3B4_HUMAN	SH3BP4	SH3 domain-binding protein 4	30	2274.22	2239.03	2290.65	2531.13	2526.03	2536.39	2352.4	2342.97	2352.28
sp|Q8N4T8|CBR4_HUMAN	CBR4	Carbonyl reductase family member 4	19	551.099	561.758	587.498	495.888	518.298	499.183	521.229	510.298	519.651
sp|Q8N4C6-7|NIN_HUMAN	NIN	Isoform 7 of Ninein	2	244.143	279.182	253.552	227.149	225.142	226.581	258.373	256.504	249.708
sp|Q9P2E9|RRBP1_HUMAN	RRBP1	Ribosome-binding protein 1	227	3930.86	4185.74	5977.04	6214.56	6133.94	6080.87	5805.44	5731.58	5755.8
sp|P23381|SYWC_HUMAN	WARS	Tryptophan--tRNA ligase, cytoplasmic	52	10154.6	10300.8	9974.8	9709.38	9691.58	9780.11	10091.6	10032.1	10012.6
sp|Q96C19|EFHD2_HUMAN	EFHD2	EF-hand domain-containing protein D2	25	3665.01	3613.73	3654.33	3632.28	3551.17	3647.16	3632.89	3607.41	3533.41
sp|Q9BUP0|EFHD1_HUMAN	EFHD1	EF-hand domain-containing protein D1	1	33.3091	31.7897	35.0232	34.3987	31.997	28.5039	32.7173	30.7526	33.5134
sp|Q9GZT9|EGLN1_HUMAN	EGLN1	Egl nine homolog 1	20	4979.57	4862.92	5047.06	4893.8	4899.18	4921.76	4975.22	4983.54	5047.4
sp|P57087-3|JAM2_HUMAN	JAM2	Isoform 3 of Junctional adhesion molecule B	4	719.14	713.873	714.493	432.825	449.617	451.924	584.388	586.261	617.199
sp|Q9Y3B7|RM11_HUMAN	MRPL11	39S ribosomal protein L11, mitochondrial	33	3914.42	3942.21	3874.16	3673.14	3643.48	3684.36	3732.08	3754.83	3721.15
sp|Q8WVQ1|CANT1_HUMAN	CANT1	Soluble calcium-activated nucleotidase 1	20	3354.81	3238.52	3299.38	3416.07	3457.42	3479.42	3299.38	3309.99	3311.12
sp|P54578|UBP14_HUMAN	USP14	Ubiquitin carboxyl-terminal hydrolase 14	58	7917.42	8009.09	7859.93	7967.77	7832.99	7857.73	7916.95	8043.65	7883.4
sp|Q7L099-3|RUFY3_HUMAN	RUFY3	Isoform 3 of Protein RUFY3	31	7497.79	7596.07	7371.13	7370.16	7466.42	7497.36	7300.91	7375.88	7351.54
sp|Q8WXA3-1|RUFY2_HUMAN	RUFY2	Isoform 5 of RUN and FYVE domain-containing protein 2	15	2001.73	2059.26	1893.67	1910.56	1911.19	1949.2	1979.3	2059.07	2026.83
sp|Q96T51|RUFY1_HUMAN	RUFY1	RUN and FYVE domain-containing protein 1	49	6908.72	6555.92	6368.62	6620.26	6440.6	6856.8	6818.63	7057	6995.37
sp|Q5VSL9|STRP1_HUMAN	STRIP1	Striatin-interacting protein 1	34	3956.33	3947.67	3929.76	3794.64	3736.77	3830.76	3812.09	3699.73	3751.15
sp|Q9ULQ0|STRP2_HUMAN	STRIP2	Striatin-interacting protein 2	4	103.896	95.8678	94.2376	92.1464	100.618	95.324	101.546	96.0734	94.6875
sp|Q9H147|TDIF1_HUMAN	DNTTIP1	Deoxynucleotidyltransferase terminal-interacting protein 1	6	1378.75	1364.6	1386.23	1320.78	1386.44	1314.04	1348.22	1312.53	1353.69
sp|P15336|ATF2_HUMAN	ATF2	Cyclic AMP-dependent transcription factor ATF-2	5	669.047	629.317	639.4	641.647	652.167	652.423	619.446	669.647	633.876
sp|P17544-6|ATF7_HUMAN	ATF7	Isoform 6 of Cyclic AMP-dependent transcription factor ATF-7	5	221.243	211.497	216.306	200.124	204.455	202.756	197.744	200.051	206.255
sp|Q02930|CREB5_HUMAN	CREB5	Cyclic AMP-responsive element-binding protein 5	4	1347.31	1359.25	1359.16	1457.03	1486.05	1451.7	1316.67	1352.98	1388.71
sp|O14497|ARI1A_HUMAN	ARID1A	AT-rich interactive domain-containing protein 1A	89	14441.7	14694.6	14321.3	14211.6	14295.1	14360.4	14027.5	14137.2	14278.4
sp|Q8NFD5-3|ARI1B_HUMAN	ARID1B	Isoform 3 of AT-rich interactive domain-containing protein 1B	19	3450.61	3437.68	3378.35	3304.34	3278.68	3286.59	3262.95	3322.12	3296.03
sp|P51970|NDUA8_HUMAN	NDUFA8	NADH dehydrogenase [ubiquinone] 1 alpha subcomplex subunit 8	13	1514.02	1559.35	1575.13	1614.81	1598.1	1608.31	1580.99	1592.51	1559.05
sp|Q9BR61|ACBD6_HUMAN	ACBD6	Acyl-CoA-binding domain-containing protein 6	16	2515.1	2492.95	2453.7	2354.87	2321.16	2374.73	2331.33	2368.45	2391.75
sp|P0DMV8|HS71A_HUMAN	HSPA1A	Heat shock 70 kDa protein 1A	130	12312.9	12255.7	12514.6	13933.4	13996.8	13520.5	12215.1	11982.3	12178.7
sp|P11021|BIP_HUMAN	HSPA5	Endoplasmic reticulum chaperone BiP	135	9448.39	9444.92	9835.73	10986.8	11042.3	10735.8	10483.9	10360.9	10283.1
sp|P11142|HSP7C_HUMAN	HSPA8	Heat shock cognate 71 kDa protein	141	22460.9	22042.7	21977.5	24220.6	24422.8	24149.4	22306.3	21828.7	22109.9
sp|P34931|HS71L_HUMAN	HSPA1L	Heat shock 70 kDa protein 1-like	9	353.253	379.264	360.342	360.62	349.369	351.861	338.136	339.503	348.504
sp|P38646|GRP75_HUMAN	HSPA9	Stress-70 protein, mitochondrial	168	20511	20250.8	20611.5	20994	21070.6	21047.1	20345.8	20194.1	20125.6
sp|P54652|HSP72_HUMAN	HSPA2	Heat shock-related 70 kDa protein 2	27	3821.44	3778.91	3681.16	3589.69	3720.87	3586.08	3570.44	3602.89	3668.84
tr|E9PK54|E9PK54_HUMAN	HSPA8	Heat shock cognate 71 kDa protein (Fragment)	6	128.63	112.784	133.589	132.53	135.383	134.716	132.543	130.362	131.152
tr|E9PN89|E9PN89_HUMAN	HSPA8	Heat shock cognate 71 kDa protein (Fragment)	3	229.227	270.791	266.024	234.215	237.044	243.336	228.576	242.879	251.2
tr|E9PS65|E9PS65_HUMAN	HSPA8	Heat shock cognate 71 kDa protein (Fragment)	3	180.883	178.668	178.746	210.21	225.69	215.779	173.203	173.947	194.571
sp|Q96NB2|SFXN2_HUMAN	SFXN2	Sideroflexin-2	5	485.231	468.63	530.373	461.685	454.595	449.843	478.043	479.275	519.83
sp|Q8TAE8|G45IP_HUMAN	GADD45GIP1	Growth arrest and DNA damage-inducible proteins-interacting protein 1	22	1833.17	1832.01	1845.42	1696.11	1707.83	1738.1	1730.35	1757.3	1702.78
sp|O15269|SPTC1_HUMAN	SPTLC1	Serine palmitoyltransferase 1	30	2216.51	2256.07	2251.12	2364.08	2342.06	2425.73	2239.08	2260.94	2213.4
sp|Q14008|CKAP5_HUMAN	CKAP5	Cytoskeleton-associated protein 5	151	24533.6	24601.2	24498.2	24901.3	24852	24946.9	24659.3	24740.8	24674.8
sp|O75400|PR40A_HUMAN	PRPF40A	Pre-mRNA-processing factor 40 homolog A	62	7777.86	7716.23	7632.54	7889.78	7716.57	7861.25	7693.53	7609.51	7629.66
sp|O75400-3|PR40A_HUMAN	PRPF40A	Isoform 3 of Pre-mRNA-processing factor 40 homolog A	4	1174.55	1186.56	1178.4	1192.47	1187.11	1152.52	1181.33	1175.31	1227.32
sp|Q6NWY9|PR40B_HUMAN	PRPF40B	Pre-mRNA-processing factor 40 homolog B	11	1384.98	1427.78	1391.65	1239.54	1255.65	1241.18	1319.34	1334.9	1322.4
sp|P31948-2|STIP1_HUMAN	STIP1	Isoform 2 of Stress-induced-phosphoprotein 1	164	26337.5	25935.2	25849.6	26846.8	27016.3	26852.8	25736.5	25433.4	25413.7
sp|Q92574|TSC1_HUMAN	TSC1	Hamartin	22	2506.5	2520.41	2470.94	2399.72	2478.38	2373.51	2470.27	2465.44	2511.18
sp|Q13423|NNTM_HUMAN	NNT	NAD(P) transhydrogenase, mitochondrial	30	5176.06	5224.2	5206.93	5145.38	5078.7	5073.71	5156.32	5072.79	5006.22
sp|P35251|RFC1_HUMAN	RFC1	Replication factor C subunit 1	59	5603.23	5563.09	5575.47	6264.16	6251.29	6109.1	6334.07	6340.61	6315.36
sp|O60885|BRD4_HUMAN	BRD4	Bromodomain-containing protein 4	55	6791.96	6745.26	6691.19	6767.99	6803.31	6705.63	6539.38	6589.09	6623.41
sp|P25440-2|BRD2_HUMAN	BRD2	Isoform 2 of Bromodomain-containing protein 2	7	496.133	497.558	464.151	517.872	494.772	485.398	481.652	467.921	458.024
sp|Q15059|BRD3_HUMAN	BRD3	Bromodomain-containing protein 3	28	4326.71	4342.63	4309.94	4149.98	4171.76	4256.39	4236.31	4168.31	4168.78
sp|Q9BWH6|RPAP1_HUMAN	RPAP1	RNA polymerase II-associated protein 1	42	3577.51	3519.47	3520.32	3093.82	3080.88	3081.83	3338	3332.12	3318.42
sp|P56945-6|BCAR1_HUMAN	BCAR1	Isoform 6 of Breast cancer anti-estrogen resistance protein 1	5	420.228	415.03	421.788	418.433	425.85	443.597	404.949	408.303	412.555
sp|P98172|EFNB1_HUMAN	EFNB1	Ephrin-B1	3	885.864	895.294	897.144	940.17	975.903	949.497	895.59	925.522	924.833
sp|Q15768|EFNB3_HUMAN	EFNB3	Ephrin-B3	3	160.303	143.19	147.411	138.56	148.896	137.936	130.053	124.671	118.523
sp|Q8WZA9|IRGQ_HUMAN	IRGQ	Immunity-related GTPase family Q protein	46	9646.58	9478.45	9380.59	8932.86	8894.42	8885.46	9153.22	9237.79	9192.14
sp|Q14498|RBM39_HUMAN	RBM39	RNA-binding protein 39	47	8626.01	8763.78	8689.9	8811.34	8944.85	8893.73	8846.81	8951.95	8806.51
sp|Q86U06|RBM23_HUMAN	RBM23	Probable RNA-binding protein 23	5	292.205	288.171	305.032	288.77	271.26	295.861	273.064	280.156	293.794
sp|Q15042|RB3GP_HUMAN	RAB3GAP1	Rab3 GTPase-activating protein catalytic subunit	68	12505.8	12694	12524.3	12449.9	12297.6	12402.4	12447.1	12588	12648.7
tr|C9JRZ6|C9JRZ6_HUMAN	CHCHD3	MICOS complex subunit	34	7348.61	7223.98	7175.47	6945.22	6919.45	6905.15	6901.86	6902.59	6864.54
sp|P26641-2|EF1G_HUMAN	EEF1G	Isoform 2 of Elongation factor 1-gamma	79	13317.5	13504	13638.5	13235	13275.9	13281.1	13614.4	13606.2	13469
sp|P20810-6|ICAL_HUMAN	CAST	Isoform 6 of Calpastatin	16	2370.2	2332.8	2407.33	2511.63	2441.56	2465.58	2400.3	2399.05	2404.85
sp|Q14642|I5P1_HUMAN	INPP5A	Inositol polyphosphate-5-phosphatase A	18	1993.74	2001.93	1982.31	1907.44	1944.7	1946.71	1900.7	1912.4	1928.08
sp|P31350-2|RIR2_HUMAN	RRM2	Isoform 2 of Ribonucleoside-diphosphate reductase subunit M2	51	6470.19	6523.63	6436.57	6663.66	6588.91	6663.46	6517.43	6613.07	6493.85
sp|Q7LG56-6|RIR2B_HUMAN	RRM2B	Isoform 6 of Ribonucleoside-diphosphate reductase subunit M2 B	15	1569.69	1550.16	1587.01	1581.57	1585.68	1597.64	1568.28	1561.16	1579.86
sp|Q16643|DREB_HUMAN	DBN1	Drebrin	80	18811.2	18040.5	18275.8	17751.5	18255.5	17845	18107.1	17721.6	18150.5
sp|Q8TF74|WIPF2_HUMAN	WIPF2	WAS/WASL-interacting protein family member 2	19	2133.67	2125.08	2099.42	2182.95	2160.4	2181.58	2075.52	2127.73	2071.23
sp|P53618|COPB_HUMAN	COPB1	Coatomer subunit beta	115	14820.6	14686.5	14858.7	14055.4	14119.8	13927.5	14443.4	14566.9	14516.3
sp|Q12809|KCNH2_HUMAN	KCNH2	Potassium voltage-gated channel subfamily H member 2	10	937.104	907.03	927.875	812.199	785.642	820.493	889.214	840.356	848.95
sp|Q8TCY9|URGCP_HUMAN	URGCP	Up-regulator of cell proliferation	39	4803.14	4845.45	4691.72	4577.56	4716.19	4606.42	4713.75	4741.16	4774.25
sp|O14981|BTAF1_HUMAN	BTAF1	TATA-binding protein-associated factor 172	64	7115.71	7227.51	7177.71	6631.98	6710.23	6802.8	7144.45	7273.53	7126.55
sp|Q99569-2|PKP4_HUMAN	PKP4	Isoform 2 of Plakophilin-4	31	807.562	825.508	893.649	871.13	879.013	903.446	843.819	845.415	898.386
sp|O95801|TTC4_HUMAN	TTC4	Tetratricopeptide repeat protein 4	22	3001.67	3133.56	3138.04	3091.23	3177.15	3198.87	3020.01	3107.45	3078.55
sp|O95429|BAG4_HUMAN	BAG4	BAG family molecular chaperone regulator 4	8	911.714	867.367	910.915	832.358	788.581	802.5	805.062	737.285	798.041
sp|Q9H2M9|RBGPR_HUMAN	RAB3GAP2	Rab3 GTPase-activating protein non-catalytic subunit	80	11786.5	11840.4	11827.2	11882.9	11883.6	11890.3	11756.2	11859.8	11754.3
sp|Q7Z5L9|I2BP2_HUMAN	IRF2BP2	Interferon regulatory factor 2-binding protein 2	44	3825.82	3781.27	3722.31	4204.77	4124.16	4163.21	3790.55	3833.09	3855.13
sp|Q9H1B7|I2BPL_HUMAN	IRF2BPL	Probable E3 ubiquitin-protein ligase IRF2BPL	37	4401.51	4453.33	4395.49	4522.4	4463.52	4506.05	4298.91	4472.2	4446.19
sp|Q9P1Y5-2|CAMP3_HUMAN	CAMSAP3	Isoform 2 of Calmodulin-regulated spectrin-associated protein 3	32	1561.63	1600.4	1609.97	1490.11	1493.39	1469.53	1446.86	1539.09	1513.01
sp|Q96P48|ARAP1_HUMAN	ARAP1	Arf-GAP with Rho-GAP domain, ANK repeat and PH domain-containing protein 1	41	3251.94	3334.76	3268.58	3224.9	3198.16	3242.84	3241.66	3246.73	3249.27
sp|Q9UKJ3|GPTC8_HUMAN	GPATCH8	G patch domain-containing protein 8	35	4984.36	4893.75	4948.66	4907.76	5011.93	4920.92	4829.79	4844.87	4934.14
sp|P30305|MPIP2_HUMAN	CDC25B	M-phase inducer phosphatase 2	4	410.974	407.846	411.104	361.135	375.817	359.265	321.818	343.001	323.464
sp|P08559-4|ODPA_HUMAN	PDHA1	Isoform 4 of Pyruvate dehydrogenase E1 component subunit alpha, somatic form, mitochondrial	61	4554.81	4472.07	4480.41	4219.5	4239.86	4230.21	4246.01	4259.6	4300.97
sp|P55209|NP1L1_HUMAN	NAP1L1	Nucleosome assembly protein 1-like 1	14	2130.81	2114.21	2076.6	2049.02	2113.66	2142.28	2086	2082.55	2146.99
sp|Q99733-2|NP1L4_HUMAN	NAP1L4	Isoform 2 of Nucleosome assembly protein 1-like 4	39	4356.12	4316.43	4284.2	4206.98	4322.08	4225.4	4304.19	4157.3	4203.38
tr|B7Z9C2|B7Z9C2_HUMAN	NAP1L1	Nucleosome assembly protein 1-like 1	4	326.101	327.702	325.194	294.366	298.198	278.376	326.318	320.423	318.155
sp|Q86XX4-2|FRAS1_HUMAN	FRAS1	Isoform 2 of Extracellular matrix protein FRAS1	34	564.62	522.219	592.314	687.719	701.995	707.896	626.927	627.046	619.022
sp|Q8N1S5|S39AB_HUMAN	SLC39A11	Zinc transporter ZIP11	2	172.781	177.843	160.112	164.344	177.225	182.361	179.189	178.45	190.433
sp|Q9H0W9|CK054_HUMAN	C11orf54	Ester hydrolase C11orf54	10	430.557	429.624	424.549	434.27	417.265	433.612	457.963	442.525	422.388
sp|Q9NVC6|MED17_HUMAN	MED17	Mediator of RNA polymerase II transcription subunit 17	15	2043.59	2087.85	2105.15	2236.85	2186.29	2146.83	2076.99	2086.9	2077.75
sp|P02545|LMNA_HUMAN	LMNA	Prelamin-A/C	145	27743.7	27614	27322.5	29114	28926.3	28962.5	27341.2	27559.1	27228.7
sp|P02545-2|LMNA_HUMAN	LMNA	Isoform C of Prelamin-A/C	1	130.385	114.413	126.302	160.988	151.336	148.987	128.16	131.042	131.237
sp|P20700|LMNB1_HUMAN	LMNB1	Lamin-B1	106	17434.1	17469.7	17021.6	17047.4	17083.2	17038.6	16972.7	17004.6	16651.1
sp|Q03252|LMNB2_HUMAN	LMNB2	Lamin-B2	94	14477.2	14556.2	14565.2	14465.1	14376.6	14475.6	14198.5	14163.4	14256.2
sp|P19338|NUCL_HUMAN	NCL	Nucleolin	165	26272.1	26529.9	26942.9	27552.2	27842.1	27503.7	26887.2	26466.8	26604
tr|H7BY16|H7BY16_HUMAN	NCL	Nucleolin (Fragment)	1	285.977	266.622	284.606	259.509	249.616	272.874	255.287	270.569	270.607
sp|P29966|MARCS_HUMAN	MARCKS	Myristoylated alanine-rich C-kinase substrate	16	8018.17	7779.12	7729.42	9416.32	9563.4	9526.78	8660.72	8385.83	8474.75
sp|P49006|MRP_HUMAN	MARCKSL1	MARCKS-related protein	12	3567.29	3643.61	3489.41	3961.13	3895.54	4025.64	3268.05	3395.94	3387.86
sp|Q9UII4|HERC5_HUMAN	HERC5	E3 ISG15--protein ligase HERC5	23	3840.32	3911.33	3857.08	3910.12	4010.79	4008.92	3974.01	4085.27	4076.9
sp|Q7KZF4|SND1_HUMAN	SND1	Staphylococcal nuclease domain-containing protein 1	140	22152.2	22011.8	22119.2	22411.4	22298.8	22200.2	23074.2	23011.4	22952.5
sp|P09327|VILI_HUMAN	VIL1	Villin-1	104	585.12	611.89	951.453	958.367	901.514	884.156	847.459	850.912	839.811
sp|Q8N3V7|SYNPO_HUMAN	SYNPO	Synaptopodin	17	3048.35	2829.71	2996.71	2728.83	2678.84	2518.43	2561.4	2470.25	2540.04
sp|Q8N3V7-2|SYNPO_HUMAN	SYNPO	Isoform 2 of Synaptopodin	3	262.485	274.278	251.892	254.637	251.673	258.771	243.177	243.772	241.096
sp|P11274|BCR_HUMAN	BCR	Breakpoint cluster region protein	21	2268.79	2263.37	2194.34	2172.54	2199.74	2159.29	2166.32	2141.44	2203.96
sp|Q12979|ABR_HUMAN	ABR	Active breakpoint cluster region-related protein	8	825.579	860.361	778.768	824.676	846.44	850.168	829.786	854.838	906.239
sp|Q6UWP2|DHR11_HUMAN	DHRS11	Dehydrogenase/reductase SDR family member 11	18	952.818	950.997	1045.43	936.802	947.889	943.943	995.396	1015.92	993.167
sp|Q9NXC5|MIO_HUMAN	MIOS	GATOR complex protein MIOS	39	2647.67	2707.54	2760.43	2673.49	2616.71	2663.87	2584.35	2616.23	2597.21
sp|P18206|VINC_HUMAN	VCL	Vinculin	131	30816.8	30720.1	30585	30494.8	30814.8	30683.8	31137.6	30974.3	31205
sp|Q8IYI6|EXOC8_HUMAN	EXOC8	Exocyst complex component 8	32	5090	5110.83	5113.55	5011.83	5020.91	5015.24	5019.44	5108.22	5143.14
sp|P42858|HD_HUMAN	HTT	Huntingtin	88	8294.74	8245.3	8206.96	7622.17	7680.51	7652.75	8000.4	8006.27	7881.03
sp|P19404|NDUV2_HUMAN	NDUFV2	NADH dehydrogenase [ubiquinone] flavoprotein 2, mitochondrial	37	3421.39	3467.61	3485.43	2895.51	2861.97	2973	3100.71	3097.92	3051.57
sp|O43837|IDH3B_HUMAN	IDH3B	Isocitrate dehydrogenase [NAD] subunit beta, mitochondrial	46	3240.89	3248.77	3308.5	3313.14	3231.69	3266.62	3202.83	3184	3148.51
sp|Q8N201|INT1_HUMAN	INTS1	Integrator complex subunit 1	75	9644.86	9594.36	9611.62	9266.49	9189.43	9413.07	9533.93	9488.92	9668.44
sp|O95466|FMNL1_HUMAN	FMNL1	Formin-like protein 1	2	130.394	121.4	122.314	123.393	123.684	111.398	126.215	118.593	121.008
sp|Q8IVF7|FMNL3_HUMAN	FMNL3	Formin-like protein 3	9	766.568	797.162	792.784	861.319	836.061	829.773	847.026	804.741	822.123
sp|Q96PY5-3|FMNL2_HUMAN	FMNL2	Isoform 2 of Formin-like protein 2	40	3559.55	3665.98	3737.02	3799.85	3793.63	3785.14	3720.53	3828.68	3892.3
sp|O00330|ODPX_HUMAN	PDHX	Pyruvate dehydrogenase protein X component, mitochondrial	32	2741.37	2848.91	2851.63	2847.92	2751.7	2824.64	2650.34	2739.98	2669.64
sp|P13995|MTDC_HUMAN	MTHFD2	Bifunctional methylenetetrahydrofolate dehydrogenase/cyclohydrolase, mitochondrial	35	3625.4	3600.12	3634.37	3291.4	3378.56	3400.73	3553.33	3478.11	3580.57
sp|Q9ULJ7|ANR50_HUMAN	ANKRD50	Ankyrin repeat domain-containing protein 50	24	2406.63	2474.2	2434.38	2481.6	2520.08	2518.07	2374.83	2412.01	2401.77
sp|Q70CQ2|UBP34_HUMAN	USP34	Ubiquitin carboxyl-terminal hydrolase 34	71	5030.83	5054.98	5182.3	4931.07	4993.92	4937.06	5169.76	5081.72	5228.25
sp|Q96F24|NRBF2_HUMAN	NRBF2	Nuclear receptor-binding factor 2	12	2039.06	2075.19	2062.16	1886.27	1934.33	1857.79	1801.64	1852.22	1890.7
sp|P08237-3|PFKAM_HUMAN	PFKM	Isoform 3 of ATP-dependent 6-phosphofructokinase, muscle type	56	15650.5	15494.7	15365.5	15222.3	15253.8	15275.9	15651.6	15652.4	15803.1
sp|P17858|PFKAL_HUMAN	PFKL	ATP-dependent 6-phosphofructokinase, liver type	55	5093.1	5063.64	5234.36	5187.88	5179.95	5281.06	5245.85	5274.99	5315.97
sp|Q01813|PFKAP_HUMAN	PFKP	ATP-dependent 6-phosphofructokinase, platelet type	63	15471.5	15517.1	15392.9	15040.2	15201.7	15209.7	15956.8	15883.5	16038.3
sp|P33897|ABCD1_HUMAN	ABCD1	ATP-binding cassette sub-family D member 1	22	1906.63	1950.89	2008.08	1915.13	1920.04	1888.9	1868.28	1907.73	1895.54
sp|Q9UBJ2|ABCD2_HUMAN	ABCD2	ATP-binding cassette sub-family D member 2	12	1669.88	1690.31	1670.9	1557.13	1588.46	1588.21	1622.99	1659.92	1673.32
sp|Q9H7E9-2|CH033_HUMAN	C8orf33	Isoform 2 of UPF0488 protein C8orf33	10	1452.42	1448.68	1475.23	1553.93	1531.09	1536.05	1481.6	1528.51	1526.26
sp|P0C0L5|CO4B_HUMAN	C4B	Complement C4-B	24	332.115	321.464	429.425	383.954	379.161	390.411	440.839	424.922	433.797
tr|A0A140TA44|A0A140TA44_HUMAN	C4A	Complement C4-A	4	11.2761	7.53871	8.61423	12.204	8.51124	8.0043	11.2926	4.9282	12.6519
sp|O95336|6PGL_HUMAN	PGLS	6-phosphogluconolactonase	44	6150.57	5944.01	5998.29	5617.67	5574.21	5592.23	6039.05	5880.35	5862.77
sp|Q00577|PURA_HUMAN	PURA	Transcriptional activator protein Pur-alpha	23	2102.94	2100.15	2160.18	2074.46	2030.23	2021.76	2058.97	2099.39	2087.04
sp|Q9BUH6|PAXX_HUMAN	PAXX	Protein PAXX	11	1987.98	1920.29	1928.46	1735	1778.62	1784.18	1754.29	1810.15	1807.04
sp|Q8N697|S15A4_HUMAN	SLC15A4	Solute carrier family 15 member 4	3	183.669	205.962	197.361	149.719	168.402	168.043	177.722	162.608	175.747
sp|Q86XI8-2|ZSWM9_HUMAN	ZSWIM9	Isoform 2 of Uncharacterized protein ZSWIM9	1	13.4174	12.8557	14.3247	13.4648	13.1521	10.2397	13.6748	9.37254	15.5436
sp|O95235|KI20A_HUMAN	KIF20A	Kinesin-like protein KIF20A	34	4214.75	4198.46	4161.52	4432.05	4401.37	4488.96	3942.13	3896.49	3858.69
sp|Q9BX93|PG12B_HUMAN	PLA2G12B	Group XIIB secretory phospholipase A2-like protein	4	23.683	34.1375	32.5355	36.3566	35.8861	40.9367	30.0687	31.5355	32.3418
sp|O94761|RECQ4_HUMAN	RECQL4	ATP-dependent DNA helicase Q4	5	209.947	222.285	237.157	224.938	228.29	201.748	237.245	231.801	230.462
sp|Q14689|DIP2A_HUMAN	DIP2A	Disco-interacting protein 2 homolog A	11	640.819	611.891	631.165	593.465	589.437	570.409	605.886	616.025	649.196
sp|Q9P265|DIP2B_HUMAN	DIP2B	Disco-interacting protein 2 homolog B	63	4925.92	4893.38	5123.02	4934.49	4914.35	4954.38	4831.65	4776.47	4803.96
sp|Q9Y2E4|DIP2C_HUMAN	DIP2C	Disco-interacting protein 2 homolog C	2	98.1668	102.986	108.39	106.383	84.9227	90.1607	99.5205	102.936	91.1365
sp|P10276|RARA_HUMAN	RARA	Retinoic acid receptor alpha	1	199.489	206.372	197.461	192.023	170.871	175.435	202.108	215.033	195.76
tr|A0A024R4E5|A0A024R4E5_HUMAN	HDLBP	High density lipoprotein binding protein (Vigilin), isoform CRA_a	158	14464	14152.6	14907.2	15049.2	14923.4	14827.8	14941.5	14682	14938.6
sp|Q8TDX7|NEK7_HUMAN	NEK7	Serine/threonine-protein kinase Nek7	15	1099.71	1128.7	1101.89	1072.62	1053.5	1053.95	1091.8	1127.57	1058.3
sp|Q9HC98-2|NEK6_HUMAN	NEK6	Isoform 2 of Serine/threonine-protein kinase Nek6	5	145.239	156.623	127.514	153.574	153.535	153.679	125.228	133.221	120.502
sp|Q92844|TANK_HUMAN	TANK	TRAF family member-associated NF-kappa-B activator	9	653.847	623.536	637.981	609.391	616.158	600.451	557.495	609.123	575.187
sp|Q9HC38-2|GLOD4_HUMAN	GLOD4	Isoform 2 of Glyoxalase domain-containing protein 4	69	11763.4	11844.2	11850.1	11563.5	11507.5	11521.3	11887.2	11723.2	11748.9
sp|Q99575|POP1_HUMAN	POP1	Ribonucleases P/MRP protein subunit POP1	38	3362.44	3370.79	3413.04	3874.41	3820.09	3799.28	3915.14	3857.2	3918.75
sp|Q53H12|AGK_HUMAN	AGK	Acylglycerol kinase, mitochondrial	9	1211.09	1207.79	1226.3	1144.29	1138	1133.53	1110.14	1114.43	1130.66
sp|Q8IZT6|ASPM_HUMAN	ASPM	Abnormal spindle-like microcephaly-associated protein	24	1940.79	1953.44	1925.46	2039.5	1991.83	2021.47	1831.5	1892.05	1854.59
sp|Q8NCG7|DGLB_HUMAN	DAGLB	Sn1-specific diacylglycerol lipase beta	8	521.172	533.393	518.101	468.722	476.855	463.433	468.933	492.267	491.608
sp|Q92616|GCN1_HUMAN	GCN1	eIF-2-alpha kinase activator GCN1	163	27641.3	27793.7	27933.4	27456.1	27212.8	27295.9	28006.3	27924	27790.3
sp|Q13615|MTMR3_HUMAN	MTMR3	Myotubularin-related protein 3	11	1098.69	1216.14	1128.28	1050.78	1062.52	1128.34	1029.79	1046.38	1061.94
sp|Q9NYA4|MTMR4_HUMAN	MTMR4	Myotubularin-related protein 4	4	86.3256	78.1622	73.5331	64.1673	81.8814	80.5233	77.0871	80.6562	78.1361
sp|Q9UNF0|PACN2_HUMAN	PACSIN2	Protein kinase C and casein kinase substrate in neurons protein 2	37	3388.18	3435.03	3561.27	3436.36	3378.66	3406.74	3551.05	3541.75	3482.2
tr|A0A0U1RR22|A0A0U1RR22_HUMAN	PACSIN2	Protein kinase C and casein kinase substrate in neurons protein 2 (Fragment)	2	39.3704	38.6399	38.2055	40.6883	31.7514	32.5998	43.1235	36.7387	37.3684
sp|O60749|SNX2_HUMAN	SNX2	Sorting nexin-2	49	5857.43	5872.56	5851.03	5883.46	5807.52	5940.27	5706.98	5759.84	5644.95
sp|Q13596|SNX1_HUMAN	SNX1	Sorting nexin-1	43	5835.62	5847.19	5839.32	5861.8	5892.37	5846.36	5708.73	5705.2	5606.91
sp|Q9UBQ7|GRHPR_HUMAN	GRHPR	Glyoxylate reductase/hydroxypyruvate reductase	36	4898.95	4946.85	4989.32	4777.87	4826.8	4816.11	4941.42	4963.52	4939.15
sp|P43304|GPDM_HUMAN	GPD2	Glycerol-3-phosphate dehydrogenase, mitochondrial	45	8893.14	8956.87	8886.41	8414.86	8410.57	8465.73	8559.3	8700.64	8881.87
sp|O94855-2|SC24D_HUMAN	SEC24D	Isoform 2 of Protein transport protein Sec24D	73	8198.08	8128.83	8217.95	8218.33	8354.7	8346.83	8439.05	8447.38	8462.12
sp|P53992|SC24C_HUMAN	SEC24C	Protein transport protein Sec24C	68	8121.04	8083.19	8002.53	8361.26	8073.74	8298.19	8366.52	8378.59	8526.16
tr|A0A0U1RR49|A0A0U1RR49_HUMAN	SEC24C	Protein transport protein Sec24C (Fragment)	2	453.145	438.182	424.624	440.815	457.097	450.998	466.073	478.097	469.063
tr|E9PC44|E9PC44_HUMAN	SEC24D	Protein transport protein Sec24D	2	186.238	189.98	195.575	169.725	156.447	157.767	191.844	174.415	171.983
sp|P29353-6|SHC1_HUMAN	SHC1	Isoform 6 of SHC-transforming protein 1	26	3176.99	3164.64	3138.84	2988.84	3040.91	2999.08	2924.53	2954.37	2963.76
sp|P02766|TTHY_HUMAN	TTR	Transthyretin	4	7.92653	11.8112	13.0525	14.2801	11.8863	10.682	10.1131	11.0372	10.4159
sp|Q96EV2|RBM33_HUMAN	RBM33	RNA-binding protein 33	19	2567.57	2498.34	2546.98	2542.22	2437.22	2464.58	2325.5	2396.64	2395.88
tr|H0Y3K4|H0Y3K4_HUMAN	RBM33	RNA-binding protein 33 (Fragment)	1	68.2368	67.1178	54.1589	75.0713	56.5152	73.6851	63.8175	62.3338	60.0178
sp|P06753|TPM3_HUMAN	TPM3	Tropomyosin alpha-3 chain	24	1985.17	1880.26	1801.63	1733.64	1754.45	1808.35	1695.57	1658.88	1593.04
sp|P06753-2|TPM3_HUMAN	TPM3	Isoform 2 of Tropomyosin alpha-3 chain	39	6710.58	6710.13	6510.97	5962.71	5956.39	6020.51	6131.32	6029.31	6054.67
sp|P09493-10|TPM1_HUMAN	TPM1	Isoform 10 of Tropomyosin alpha-1 chain	28	10494.7	10757.9	10360.7	9444.52	9580.24	9500.09	9545.3	9430.59	9544.04
sp|P09493-3|TPM1_HUMAN	TPM1	Isoform 3 of Tropomyosin alpha-1 chain	6	998.325	996.646	944.462	915.758	899.302	905.656	893.741	935.403	877.181
sp|P67936|TPM4_HUMAN	TPM4	Tropomyosin alpha-4 chain	24	4369.1	4260.87	4152.22	3845.21	3766.23	3822.88	3859.43	3906.22	3909.83
tr|H0YK48|H0YK48_HUMAN	TPM1	Tropomyosin alpha-1 chain	1	143.164	149.096	145.638	132.483	137.108	125.247	133.833	127.226	121.688
sp|Q6P1J9|CDC73_HUMAN	CDC73	Parafibromin	50	9381.62	9413.51	9328.25	8810.17	8883.31	8822.52	9173.28	9126.09	9055
sp|Q96JM2-3|ZN462_HUMAN	ZNF462	Isoform 3 of Zinc finger protein 462	39	5398.18	5369.05	5292.49	5254.74	5108.59	5255.25	5145.72	5208.48	5188.78
sp|O75061|AUXI_HUMAN	DNAJC6	Putative tyrosine-protein phosphatase auxilin	24	3724.56	3781.66	3718.85	3918.6	3979.88	3883.67	3729.66	3801.6	3815.69
sp|P51452|DUS3_HUMAN	DUSP3	Dual specificity protein phosphatase 3	27	3488.65	3452.48	3484.34	3643.97	3600.7	3640.26	3485.46	3521.47	3487.79
sp|P21796|VDAC1_HUMAN	VDAC1	Voltage-dependent anion-selective channel protein 1	101	9709.43	9790.01	9838.04	10065.5	10077	10069.1	9654.6	9613.72	9516.95
sp|Q9Y277|VDAC3_HUMAN	VDAC3	Voltage-dependent anion-selective channel protein 3	3	40.2819	41.0663	37.0801	36.3053	45.3992	33.2376	34.5172	36.5651	33.7422
sp|Q9Y277-2|VDAC3_HUMAN	VDAC3	Isoform 2 of Voltage-dependent anion-selective channel protein 3	63	7099.88	7050.68	7127.92	7265.3	7187.5	7197.76	6993.56	6977.21	6834.66
tr|C9JI87|C9JI87_HUMAN	VDAC1	Voltage-dependent anion-selective channel protein 1 (Fragment)	2	339.624	359.816	404.75	396.057	363.104	366.264	392.517	365.093	371.903
sp|O00327|BMAL1_HUMAN	ARNTL	Aryl hydrocarbon receptor nuclear translocator-like protein 1	9	718.495	713.967	709.554	699.95	688.35	723.197	712.325	682.632	705.986
sp|O95785-3|WIZ_HUMAN	WIZ	Isoform 3 of Protein Wiz	53	4993.67	5134.85	5055.84	4939.93	4950.9	4947.3	4775.22	4829.71	4742.4
sp|O95785-4|WIZ_HUMAN	WIZ	Isoform 4 of Protein Wiz	6	148.633	137.54	117.169	123.665	152.646	116.185	116.015	125.616	139.407
sp|Q8TDY4|ASAP3_HUMAN	ASAP3	Arf-GAP with SH3 domain, ANK repeat and PH domain-containing protein 3	11	500.702	501.162	530.882	518.391	501.117	484.984	512.335	515.502	528.806
sp|Q7Z3D6-2|GLUCM_HUMAN	DGLUCY	Isoform 2 of D-glutamate cyclase, mitochondrial	15	853.976	854.298	859.077	805.404	773.684	776.446	844.611	821.366	805.076
sp|O75151|PHF2_HUMAN	PHF2	Lysine-specific demethylase PHF2	13	478.724	497.906	493.937	518.747	546.856	496.975	489.819	502.046	509.889
sp|Q9UPP1|PHF8_HUMAN	PHF8	Histone lysine demethylase PHF8	14	837.908	860.469	846.288	898.724	935.027	936.466	877.522	935.221	913.747
sp|P12259|FA5_HUMAN	F5	Coagulation factor V	25	476.301	495.889	557.886	542.423	548.891	553.634	472.66	490.86	499.929
sp|P98194-7|AT2C1_HUMAN	ATP2C1	Isoform 7 of Calcium-transporting ATPase type 2C member 1	22	2558.15	2493.9	2483.59	2685.14	2654.97	2578.4	2376.8	2464.17	2445.07
sp|Q96HS1|PGAM5_HUMAN	PGAM5	Serine/threonine-protein phosphatase PGAM5, mitochondrial	36	2218.94	2181.65	2228.87	2082.75	2087.74	2162.61	2167.21	2213.59	2189.23
sp|Q9UBZ9|REV1_HUMAN	REV1	DNA repair protein REV1	6	432.495	436.149	436.011	459.768	434.939	454.479	423.693	415.377	425.314
sp|Q12888-2|TP53B_HUMAN	TP53BP1	Isoform 2 of TP53-binding protein 1	128	22336.9	22380.2	22014.7	21940.5	22151.5	22103.8	21972.2	22129.4	22310.8
sp|Q9H0R6|GATA_HUMAN	QRSL1	Glutamyl-tRNA(Gln) amidotransferase subunit A, mitochondrial	19	2446.27	2451.58	2484.91	2448.54	2412.64	2457.7	2416.31	2388.41	2379.97
sp|O60701|UGDH_HUMAN	UGDH	UDP-glucose 6-dehydrogenase	124	2970.88	3024.98	3723.59	3777.96	3645.07	3691.93	3599.3	3649.16	3585.81
sp|Q8NFC6|BD1L1_HUMAN	BOD1L1	Biorientation of chromosomes in cell division protein 1-like 1	76	15948	15991.4	15699.2	15761.9	15599.4	15800.2	15426	15561.7	15495.9
sp|Q96IK1|BOD1_HUMAN	BOD1	Biorientation of chromosomes in cell division protein 1	5	898.417	891.316	888.895	830.885	819.715	839.215	776.486	794.4	785.119
sp|Q96QT4|TRPM7_HUMAN	TRPM7	Transient receptor potential cation channel subfamily M member 7	14	601.517	615.287	643.959	592.507	593.065	603.585	648.163	661.362	671.99
sp|Q9UJP4|KLH21_HUMAN	KLHL21	Kelch-like protein 21	1	30.9083	39.3601	29.0887	32.8778	26.7278	32.9999	30.5244	27.5718	34.2057
sp|P78362-2|SRPK2_HUMAN	SRPK2	Isoform 2 of SRSF protein kinase 2	38	3993.59	4085.73	4000.12	4082.6	4067.59	4028.03	4046.44	4041.38	4030.66
sp|Q96SB4-3|SRPK1_HUMAN	SRPK1	Isoform 1 of SRSF protein kinase 1	35	5301.49	5184.99	5337.68	5730.74	5578.37	5651.81	5566.96	5560.94	5454.35
sp|O94973|AP2A2_HUMAN	AP2A2	AP-2 complex subunit alpha-2	49	7221.1	7039.42	7169.69	6812.38	6934.25	6942.2	7167.22	6936.92	7011.42
sp|O95782|AP2A1_HUMAN	AP2A1	AP-2 complex subunit alpha-1	93	9142.7	9271.73	9358.43	8709.08	8691.46	8677.89	9014.51	8978.97	8954.19
sp|Q15293|RCN1_HUMAN	RCN1	Reticulocalbin-1	33	2940.61	2958.72	2909.13	3154.69	3106.68	3109.38	3077.43	3185.63	3125.72
sp|O15382|BCAT2_HUMAN	BCAT2	Branched-chain-amino-acid aminotransferase, mitochondrial	11	2109.25	2234	2131.35	1967.27	2019.34	2008.67	2063.02	2061.46	2030.01
sp|Q9UPZ6|THS7A_HUMAN	THSD7A	Thrombospondin type-1 domain-containing protein 7A	10	1498.8	1480.09	1481.08	1426.3	1450	1445.74	1113.69	1134.7	1126.47
sp|Q9UBV2|SE1L1_HUMAN	SEL1L	Protein sel-1 homolog 1	35	1942.43	2013.7	2077.3	2326.39	2297.1	2289.88	2522.7	2553.75	2527.27
sp|P30038|AL4A1_HUMAN	ALDH4A1	Delta-1-pyrroline-5-carboxylate dehydrogenase, mitochondrial	77	1610.51	1644.62	2045.68	2019.44	1999.71	2041.76	1955.09	1957.68	2020.01
sp|P16989|YBOX3_HUMAN	YBX3	Y-box-binding protein 3	36	3960.82	3972.08	3956.97	4144.88	3995.77	4050.21	3952.45	3997.74	4015.55
sp|P67809|YBOX1_HUMAN	YBX1	Y-box-binding protein 1	13	2566.85	2563.14	2563.96	2527.04	2496.97	2500.53	2494.67	2586.42	2531.26
sp|Q9Y2T7|YBOX2_HUMAN	YBX2	Y-box-binding protein 2	5	636.017	639.826	607.422	559.244	595.525	554.605	562.719	567.675	563.461
sp|O94964-2|SOGA1_HUMAN	SOGA1	Isoform 2 of Protein SOGA1	49	6306.52	6420.89	6374.39	5794.15	5800.88	5764.61	5376.11	5552.58	5587.23
sp|Q5TF21|SOGA3_HUMAN	SOGA3	Protein SOGA3	27	5622.12	5472.35	5369.43	5512.68	5485.48	5510.91	5164.77	5129.93	5284.41
sp|Q9Y4B5|MTCL1_HUMAN	MTCL1	Microtubule cross-linking factor 1	14	950.009	967.492	957.88	896.478	944.396	935.515	869.296	875.501	863.464
sp|Q7Z6I8|CE024_HUMAN	C5orf24	UPF0461 protein C5orf24	5	487.419	548.08	509.402	488.299	497.018	493.014	459.201	520.058	495.832
sp|Q9BUN8|DERL1_HUMAN	DERL1	Derlin-1	10	719.939	726.972	752.461	811.661	838.776	820.642	789.261	787.081	800.789
sp|Q92805|GOGA1_HUMAN	GOLGA1	Golgin subfamily A member 1	27	1456.59	1437.36	1435.62	1476.63	1455.65	1401.01	1336.11	1362.24	1347.3
sp|Q96KM6|Z512B_HUMAN	ZNF512B	Zinc finger protein 512B	23	1307.79	1341.12	1411.37	1414.8	1409.56	1437.72	1486.71	1454.53	1531.27
sp|Q1ED39|KNOP1_HUMAN	KNOP1	Lysine-rich nucleolar protein 1	34	6261.34	6373.82	6294.72	6915.27	6854.71	6944.51	6286.74	6340.13	6444.58
sp|Q6VMQ6-4|MCAF1_HUMAN	ATF7IP	Isoform 3 of Activating transcription factor 7-interacting protein 1	20	2870.86	2911.48	2814.27	2940.36	2818.01	2885.37	2780.3	2787.57	2803.64
sp|Q9NU22|MDN1_HUMAN	MDN1	Midasin	151	15821	15811	15943.8	15228	15183	15108.8	15742	15956.5	15957.1
sp|Q969T9|WBP2_HUMAN	WBP2	WW domain-binding protein 2	16	1819.27	1865.11	1797.29	1710.4	1742.07	1692.71	1717.64	1673.8	1678.17
sp|O75569|PRKRA_HUMAN	PRKRA	Interferon-inducible double-stranded RNA-dependent protein kinase activator A	16	1973.26	2002.41	2003.73	1991.14	1892.62	1910.65	1938	2009.91	1970.27
sp|Q8IZ83|A16A1_HUMAN	ALDH16A1	Aldehyde dehydrogenase family 16 member A1	30	1780.92	1873.48	1823.8	1706.72	1681.75	1731.78	1818.52	1834.89	1796.28
sp|P46821|MAP1B_HUMAN	MAP1B	Microtubule-associated protein 1B	205	59426.5	58157.9	58097.1	54919.8	55889.3	55195.4	56103.2	56089.8	56433.6
sp|P78559|MAP1A_HUMAN	MAP1A	Microtubule-associated protein 1A	68	10445.6	10559	10451	10772.8	10841	11008	10095.3	9922.35	10094.8
sp|P55263|ADK_HUMAN	ADK	Adenosine kinase	46	4058.72	4075.75	4137.68	4140.23	4092.26	4094.59	4135.53	4101.53	3988.08
tr|A0A5F9ZHJ1|A0A5F9ZHJ1_HUMAN	ADK	Adenosine kinase	1	65.3883	65.7191	61.6797	66.4248	60.3758	56.2522	87.7111	94.8667	81.4533
sp|Q14554|PDIA5_HUMAN	PDIA5	Protein disulfide-isomerase A5	46	2247.06	2213.09	2423.36	2423.92	2376.55	2410.54	2457.46	2411.14	2422
sp|Q2NKX8|ERC6L_HUMAN	ERCC6L	DNA excision repair protein ERCC-6-like	31	5811.3	5733.12	5700.33	5363.83	5421.2	5461.8	5250.6	5203.28	5267.37
sp|Q08211|DHX9_HUMAN	DHX9	ATP-dependent RNA helicase A	135	21021.8	20989.8	20948.2	21147.2	21196.2	21113.6	21129.2	20983.4	21012.7
sp|Q14194|DPYL1_HUMAN	CRMP1	Dihydropyrimidinase-related protein 1	3	1019.77	1009.99	970.342	994.417	957.183	938.816	974.951	974.655	941.131
sp|Q14194-2|DPYL1_HUMAN	CRMP1	Isoform LCRMP-1 of Dihydropyrimidinase-related protein 1	81	18875.5	18536.9	18329.3	17525.4	17937.3	17581.4	18204.1	18056.9	18394.6
sp|Q14195-2|DPYL3_HUMAN	DPYSL3	Isoform LCRMP-4 of Dihydropyrimidinase-related protein 3	114	26802.9	26210.2	25990.9	25220.5	25417.5	25126.2	26065.8	25930	26031.1
tr|A0A1C7CYX9|A0A1C7CYX9_HUMAN	DPYSL2	Dihydropyrimidinase-related protein 2	155	29431.6	29323.6	28785.9	27972	28228.1	28211.9	28698.2	28483.4	28489.5
sp|Q9UQ90|SPG7_HUMAN	SPG7	Paraplegin	5	209.536	223.133	228.443	225.13	227.356	233.028	230.06	229.272	207.867
sp|P35475-2|IDUA_HUMAN	IDUA	Isoform 2 of Alpha-L-iduronidase	2	59.5745	56.8901	60.6411	63.002	57.551	57.4551	57.4145	53.8924	57.3486
sp|Q9NW82|WDR70_HUMAN	WDR70	WD repeat-containing protein 70	38	5479.88	5555.23	5523.79	5261.04	5147.68	5307.53	5259.76	5413.44	5254
sp|Q9BZD4|NUF2_HUMAN	NUF2	Kinetochore protein Nuf2	24	3542.78	3536.6	3499.27	3719.27	3714.51	3648.26	3546.78	3446.25	3474.42
sp|O75122|CLAP2_HUMAN	CLASP2	CLIP-associating protein 2	2	322.003	329.762	327.104	308.339	302.785	331.937	291.43	297.488	260.378
sp|O75122-3|CLAP2_HUMAN	CLASP2	Isoform 3 of CLIP-associating protein 2	24	3275.75	3337.48	3266.58	3322.59	3243.62	3282.6	3290	3310.09	3352.74
sp|Q7Z460|CLAP1_HUMAN	CLASP1	CLIP-associating protein 1	86	11670.1	11666.5	11462	11524.4	11443.1	11409	11665.5	11708.8	11780.3
sp|Q7Z460-4|CLAP1_HUMAN	CLASP1	Isoform 4 of CLIP-associating protein 1	5	375.659	392.919	383.533	374.627	367.523	376.2	348.098	366.224	381.824
sp|Q8NEC7|GSTCD_HUMAN	GSTCD	Glutathione S-transferase C-terminal domain-containing protein	15	2466.81	2509.9	2569.65	2330.15	2323.56	2365.59	2600.52	2572.39	2628.74
sp|Q13356|PPIL2_HUMAN	PPIL2	RING-type E3 ubiquitin-protein ligase PPIL2	39	4458.81	4496.18	4499.84	4630.82	4542.79	4605.03	4351.08	4387.4	4400.04
sp|Q9NPJ8-3|NXT2_HUMAN	NXT2	Isoform 3 of NTF2-related export protein 2	10	1546.09	1646.03	1667.83	1576.31	1502.52	1486.63	1557.12	1596.12	1656.43
sp|Q9UKK6|NXT1_HUMAN	NXT1	NTF2-related export protein 1	1	66.872	63.953	76.6433	71.8982	65.1156	63.7589	73.1796	70.055	62.1396
sp|P11586|C1TC_HUMAN	MTHFD1	C-1-tetrahydrofolate synthase, cytoplasmic	41	6705.84	6648.78	6622	6504.14	6560.67	6548.6	6815.3	6787.15	6664.57
sp|Q6UB35|C1TM_HUMAN	MTHFD1L	Monofunctional C1-tetrahydrofolate synthase, mitochondrial	60	8429.62	8510.16	8659.35	8043.25	8106.76	8072.36	8472.51	8455.89	8488.96
tr|A0A384N5Y3|A0A384N5Y3_HUMAN	MTHFD1	C-1-tetrahydrofolate synthase, cytoplasmic	2	7.34074	2.03395	9.53792	6.87192	10.0918	9.01626	11.2911	11.3527	11.3118
tr|A0A494C1T2|A0A494C1T2_HUMAN	MTHFD1	C-1-tetrahydrofolate synthase, cytoplasmic (Fragment)	2	576.35	567.031	608.174	484.166	496.89	492.705	512.019	566.388	534.094
tr|B7ZM99|B7ZM99_HUMAN	MTHFD1L	MTHFD1L protein	3	103.066	102.135	110.148	103.965	105.862	95.4504	106.242	98.0824	117.763
sp|Q14202|ZMYM3_HUMAN	ZMYM3	Zinc finger MYM-type protein 3	31	803.121	818.284	875.643	830.024	824.959	834.528	835.994	831.466	832.069
sp|Q5SVZ6|ZMYM1_HUMAN	ZMYM1	Zinc finger MYM-type protein 1	15	976.131	924.223	966.099	934.023	939.933	902.201	932.399	907.435	926.898
sp|Q5VZL5|ZMYM4_HUMAN	ZMYM4	Zinc finger MYM-type protein 4	47	6638.68	6651.75	6664.98	6475.57	6512.91	6416.99	6464.88	6476.58	6522.15
sp|Q9UBW7|ZMYM2_HUMAN	ZMYM2	Zinc finger MYM-type protein 2	47	5826.35	5777.64	5771.28	5723.8	5709.77	5686.86	5676.47	5692.47	5633.79
sp|P17252|KPCA_HUMAN	PRKCA	Protein kinase C alpha type	63	7128.22	7053.86	7081.17	6833.97	6845.58	6831.73	7035.08	6950.72	7022.64
sp|Q02156|KPCE_HUMAN	PRKCE	Protein kinase C epsilon type	13	2126.17	2107.03	2142.38	2100.35	2072.47	2091.86	2167.02	2145.4	2100.35
sp|Q04759|KPCT_HUMAN	PRKCQ	Protein kinase C theta type	7	660.01	645.04	642.341	644.754	620.913	628.055	612.186	638.422	621.332
sp|Q05655|KPCD_HUMAN	PRKCD	Protein kinase C delta type	27	781.526	803.995	840.986	850.576	813.434	843.201	799.386	794.175	780.194
sp|Q9UHB6-4|LIMA1_HUMAN	LIMA1	Isoform 4 of LIM domain and actin-binding protein 1	63	11304.3	11233.8	11382	10812.9	10874.4	10820.6	10472.5	10524.2	10616.1
sp|P78314-4|3BP2_HUMAN	SH3BP2	Isoform 4 of SH3 domain-binding protein 2	1	93.4831	83.9892	77.9406	83.7463	90.1308	75.8795	87.6573	75.2291	83.3573
sp|Q99707|METH_HUMAN	MTR	Methionine synthase	63	9457.09	9266.88	9127.12	9050.17	9223.04	9128.03	9007.15	9044.56	9136.37
sp|Q8WUB8|PHF10_HUMAN	PHF10	PHD finger protein 10	16	1765.9	1809.19	1756.32	1781.06	1761.56	1790.98	1761.3	1769.61	1728.91
sp|Q9P253|VPS18_HUMAN	VPS18	Vacuolar protein sorting-associated protein 18 homolog	36	4704.23	4760.88	4712.2	4637.4	4639.67	4638.24	4671.54	4681.43	4721.48
sp|Q52LJ0|FA98B_HUMAN	FAM98B	Protein FAM98B	28	4764.27	4755.62	4572.27	4706.77	4790.58	4756.01	4778.94	4788	4772.4
sp|Q8NCA5|FA98A_HUMAN	FAM98A	Protein FAM98A	37	2351.79	2316.23	2329.08	2487.55	2448.73	2419.64	2353.87	2385.54	2422.87
sp|Q9NW13|RBM28_HUMAN	RBM28	RNA-binding protein 28	71	11027	11038.2	10859.2	12960.8	13081.1	12892	12750	12660.1	12895.8
sp|P40818|UBP8_HUMAN	USP8	Ubiquitin carboxyl-terminal hydrolase 8	30	4030.08	4060.07	4122.75	4038.62	4016.32	4039.4	4097	4061.2	4074.34
tr|A0A2R8Y566|A0A2R8Y566_HUMAN	RELCH	RAB11-binding protein RELCH	40	3457.78	3453.44	3522.11	3433.05	3400.09	3419.06	3397.32	3414.6	3387.42
sp|P49641|MA2A2_HUMAN	MAN2A2	Alpha-mannosidase 2x	8	542.056	544.961	588.983	576.529	592.285	584.237	588.576	586.565	601.433
sp|Q16706|MA2A1_HUMAN	MAN2A1	Alpha-mannosidase 2	49	974.311	1023.2	1113.66	1130.73	1098.46	1118.74	1117.72	1101.92	1080.63
sp|P49917|DNLI4_HUMAN	LIG4	DNA ligase 4	28	2623.05	2591.89	2521	2635.48	2703.7	2692.95	2664.4	2621.32	2686.82
sp|Q9HCS7|SYF1_HUMAN	XAB2	Pre-mRNA-splicing factor SYF1	44	5918.9	5879.79	5764.89	5768.55	5817.7	5853.58	5969.52	6028.31	6081.5
sp|Q9NVM6|DJC17_HUMAN	DNAJC17	DnaJ homolog subfamily C member 17	10	1209.93	1226.99	1214.61	1135.73	1149.34	1136.84	1155.94	1210.35	1178.01
sp|Q9UHV9|PFD2_HUMAN	PFDN2	Prefoldin subunit 2	26	6157.47	6248.2	6214.17	6048.09	6188.38	6145.36	6072.53	5997.78	6168.91
sp|Q6PGP7|TTC37_HUMAN	TTC37	Tetratricopeptide repeat protein 37	80	11369.6	11485.6	11340.6	11050.5	11091.3	11006	11152.3	11220.5	11211.5
sp|O94906|PRP6_HUMAN	PRPF6	Pre-mRNA-processing factor 6	76	9760.4	9902.34	9760.19	10070.4	10075.2	10069.5	10064.5	10093.6	10137.6
sp|Q86Y79|PTH_HUMAN	PTRH1	Probable peptidyl-tRNA hydrolase	8	959.517	975.583	953.065	832.234	812.05	837.07	894.927	882.162	887.419
sp|Q9NR33|DPOE4_HUMAN	POLE4	DNA polymerase epsilon subunit 4	6	839.045	819.664	818.148	815.371	769.846	825.977	827.748	831.486	855.689
sp|P35232|PHB_HUMAN	PHB	Prohibitin	65	10598.4	10421.6	10490.2	9877.26	10154.7	9931.8	10119.2	9908.67	9733.88
sp|Q96T49|PP16B_HUMAN	PPP1R16B	Protein phosphatase 1 regulatory inhibitor subunit 16B	6	287.466	297.243	274.195	269.832	283.587	314.85	259.628	292.282	280.824
sp|Q5JVF3|PCID2_HUMAN	PCID2	PCI domain-containing protein 2	38	3973.02	3936.41	3920.24	3875.78	3939.85	3979.22	3981.87	4025.32	3990.43
sp|Q9BUK6|MSTO1_HUMAN	MSTO1	Protein misato homolog 1	13	962.506	980.779	1001.97	975.93	933.946	937.945	1006.1	976.712	981.212
sp|O75717|WDHD1_HUMAN	WDHD1	WD repeat and HMG-box DNA-binding protein 1	78	10468	10356.6	10353.9	10342.4	10331	10305.1	10019.1	9964.16	10025.9
sp|Q96I15|SCLY_HUMAN	SCLY	Selenocysteine lyase	15	1532.77	1547.25	1551.46	1500.68	1535.21	1532.4	1504.24	1527.43	1477.14
sp|Q08379|GOGA2_HUMAN	GOLGA2	Golgin subfamily A member 2	60	4845.86	4905.58	4791.7	5006.37	4919.18	4845.72	4747.67	4692.1	4718.32
sp|Q9NVV4|PAPD1_HUMAN	MTPAP	Poly(A) RNA polymerase, mitochondrial	22	2710.55	2761.14	2766.91	2724.51	2636.33	2714.28	2643.59	2732.48	2664.52
sp|O15090|ZN536_HUMAN	ZNF536	Zinc finger protein 536	15	1977.16	1958.64	1997.12	1877.46	1804.58	1804.87	1862.54	1896.88	1859.25
sp|Q86TM6|SYVN1_HUMAN	SYVN1	E3 ubiquitin-protein ligase synoviolin	9	555.125	580.46	598.417	640.658	607.799	613.784	710.798	715.24	679.451
sp|P78318|IGBP1_HUMAN	IGBP1	Immunoglobulin-binding protein 1	17	2003.13	2004.73	1998.17	2005.97	1972.31	2027.44	1934.46	1943.48	1954.98
sp|O60282|KIF5C_HUMAN	KIF5C	Kinesin heavy chain isoform 5C	62	13255.2	13274	13088.2	13015.3	12957.3	13157.8	13157.6	13284	13367.5
sp|P33176|KINH_HUMAN	KIF5B	Kinesin-1 heavy chain	94	19283.4	19143.8	19082.5	19089.7	19148.2	19169.6	19323.9	19305.8	19420.7
sp|Q12840|KIF5A_HUMAN	KIF5A	Kinesin heavy chain isoform 5A	45	13925.7	13741.4	13600.6	13032.6	13374.3	13185.2	13882.1	13722.1	14003.7
sp|Q9ULH7-5|MRTFB_HUMAN	MRTFB	Isoform 5 of Myocardin-related transcription factor B	27	1775.05	1815.76	1829.24	1674.18	1712.84	1698.74	1644.52	1720.24	1648.88
sp|Q6ZVM7|TM1L2_HUMAN	TOM1L2	TOM1-like protein 2	10	753.47	757.069	713.782	666.592	701.633	689.314	710.592	724.014	735.094
sp|Q96CW6|S7A6O_HUMAN	SLC7A6OS	Probable RNA polymerase II nuclear localization protein SLC7A6OS	3	325.526	324.555	318.59	341.175	331.084	330.106	312.171	314.016	299.175
sp|Q6ICG6|K0930_HUMAN	KIAA0930	Uncharacterized protein KIAA0930	7	524.812	536.244	524.23	502.03	503.215	531.685	520.062	538.367	535.917
sp|Q9UN70|PCDGK_HUMAN	PCDHGC3	Protocadherin gamma-C3	2	52.9733	58.2463	50.7611	71.0666	60.8127	75.2673	54.0061	53.6613	46.9005
sp|Q9Y5E7|PCDB2_HUMAN	PCDHB2	Protocadherin beta-2	1	61.3901	66.3995	60.9721	72.508	77.2849	72.4612	64.4095	54.1038	62.5045
sp|O60524|NEMF_HUMAN	NEMF	Nuclear export mediator factor NEMF	37	5049.71	5248.89	5085.82	5428.94	5246.6	5348.7	5339.92	5523.8	5539.48
sp|Q2T9J0|TYSD1_HUMAN	TYSND1	Peroxisomal leader peptide-processing protease	4	166.718	173.229	179.876	165.778	171.13	169.926	165.236	182.235	179.157
sp|Q00610|CLH1_HUMAN	CLTC	Clathrin heavy chain 1	273	37630.3	37880.5	37537.6	38773.3	38744.6	38784.2	38596.1	38616	38528.2
sp|P51957|NEK4_HUMAN	NEK4	Serine/threonine-protein kinase Nek4	9	621.529	609.921	616.751	589.903	597.747	599.439	645.885	675.063	612.492
sp|Q9H6R3|ACSS3_HUMAN	ACSS3	Acyl-CoA synthetase short-chain family member 3, mitochondrial	51	356.737	420.126	652.333	586.773	608.389	555.583	568.585	606.342	564.293
sp|O60825|F262_HUMAN	PFKFB2	6-phosphofructo-2-kinase/fructose-2,6-bisphosphatase 2	20	1413.68	1455.04	1473.7	1327.84	1358.74	1362.83	1405.88	1412.1	1433.17
sp|Q16875-4|F263_HUMAN	PFKFB3	Isoform 4 of 6-phosphofructo-2-kinase/fructose-2,6-bisphosphatase 3	5	126.319	137.576	145.165	124.645	121.734	128.758	141.451	129.243	141.213
sp|Q16877|F264_HUMAN	PFKFB4	6-phosphofructo-2-kinase/fructose-2,6-bisphosphatase 4	20	786.197	838.989	817.516	791.623	800.38	816.154	827.041	821.079	800.644
sp|P28340|DPOD1_HUMAN	POLD1	DNA polymerase delta catalytic subunit	31	3190.53	3229.87	3143.84	2957.02	2972.5	3093.21	3111.32	3217.84	3216.64
sp|P49327|FAS_HUMAN	FASN	Fatty acid synthase	195	12877.2	12932.6	13819.4	13636.3	13381.8	13333.1	13632.3	13690.6	13524.2
sp|O76021|RL1D1_HUMAN	RSL1D1	Ribosomal L1 domain-containing protein 1	48	5652.66	5679.39	5722.39	6487.27	6450.84	6456.02	6153.36	6193.19	6011.37
sp|P35606|COPB2_HUMAN	COPB2	Coatomer subunit beta'	94	10359.5	10562.5	10659.9	10534.1	10633.5	10593.5	10542.1	10903.6	10863
sp|Q14676|MDC1_HUMAN	MDC1	Mediator of DNA damage checkpoint protein 1	61	9171.08	9134.08	8933.16	8901.72	8870.28	9042.33	8630.27	8692.57	8733.69
sp|P53985|MOT1_HUMAN	SLC16A1	Monocarboxylate transporter 1	12	1053.22	1022.44	1131.79	1159.52	1164.48	1146.8	1163	1121.89	1101.89
sp|Q9BY42|RTF2_HUMAN	RTF2	Replication termination factor 2	18	2661.13	2699.76	2680.56	2663.24	2771.44	2626.2	2622.16	2569.06	2610.92
sp|Q13488|VPP3_HUMAN	TCIRG1	V-type proton ATPase 116 kDa subunit a isoform 3	9	47.2522	42.0768	46.6144	46.1505	54.9983	41.1102	59.0946	55.1309	39.9605
sp|Q93050|VPP1_HUMAN	ATP6V0A1	V-type proton ATPase 116 kDa subunit a isoform 1	43	4526.67	4536.44	4554.11	4215.78	4198.41	4278.45	4264.37	4340.97	4325.04
sp|Q9Y487|VPP2_HUMAN	ATP6V0A2	V-type proton ATPase 116 kDa subunit a isoform 2	23	1954.87	1859.28	1875.91	2185.43	2109.95	2131.69	1978.83	1991.36	1981.85
sp|Q9Y5Q9|TF3C3_HUMAN	GTF3C3	General transcription factor 3C polypeptide 3	57	6445.08	6381	6460.29	6220.26	6272.6	6313.74	6442.81	6276.23	6311.56
sp|Q9P032|NDUF4_HUMAN	NDUFAF4	NADH dehydrogenase [ubiquinone] 1 alpha subcomplex assembly factor 4	19	3947.69	3980.92	4062.55	4210.4	4134.43	4185.85	4129.07	4117.03	4108.22
sp|Q9NZN8|CNOT2_HUMAN	CNOT2	CCR4-NOT transcription complex subunit 2	17	2226.87	2260.9	2225.44	2127.06	2110	2194.53	2169.19	2234.39	2161.16
sp|Q5HYK3|COQ5_HUMAN	COQ5	2-methoxy-6-polyprenyl-1,4-benzoquinol methylase, mitochondrial	14	1573.44	1592.74	1604.49	1645.37	1631.04	1635.11	1634.33	1577.34	1616.31
sp|Q9GZS1|RPA49_HUMAN	POLR1E	DNA-directed RNA polymerase I subunit RPA49	29	3134.05	3297.15	3249.31	3211.63	3216.17	3274.27	3157.84	3223.84	3254.02
sp|Q5TC82|RC3H1_HUMAN	RC3H1	Roquin-1	14	628.059	678.331	644.415	665.777	629.979	667.56	670.193	608.639	658.588
sp|Q9HBD1|RC3H2_HUMAN	RC3H2	Roquin-2	9	933.826	975.798	979.609	902.056	879.517	897.187	934.108	900.787	897.109
sp|P56192|SYMC_HUMAN	MARS	Methionine--tRNA ligase, cytoplasmic	68	8625.77	8855.13	8876.59	8741.97	8724.38	8744.19	9048.01	8961.66	8956.55
sp|P37802-2|TAGL2_HUMAN	TAGLN2	Isoform 2 of Transgelin-2	82	23776	23366.8	23131.1	23209.2	23535.4	23339.8	23052.2	22832.9	22954
sp|Q01995|TAGL_HUMAN	TAGLN	Transgelin	15	250.171	270.106	403.84	424.75	398.817	377.408	413.524	419.017	421.921
sp|Q9UI15|TAGL3_HUMAN	TAGLN3	Transgelin-3	30	9760.76	9888.08	9668.76	9239.94	9267.96	9384.77	9408.28	9488.28	9571.08
sp|Q15633|TRBP2_HUMAN	TARBP2	RISC-loading complex subunit TARBP2	9	747.391	748.254	756.235	724.523	702.715	710.978	758.902	784.063	744.811
sp|P30622-2|CLIP1_HUMAN	CLIP1	Isoform 3 of CAP-Gly domain-containing linker protein 1	56	6622.53	6537.51	6611.25	6589.04	6523.33	6538.46	6259.82	6321.45	6348.02
sp|Q9UDT6|CLIP2_HUMAN	CLIP2	CAP-Gly domain-containing linker protein 2	43	6577.42	6562.28	6447.76	6345.06	6375.73	6460.34	6217.64	6293.4	6337.02
sp|P52272|HNRPM_HUMAN	HNRNPM	Heterogeneous nuclear ribonucleoprotein M	138	19349.2	19452.4	19366.8	18807.6	18867	18687.8	18369.3	18312.2	18294.9
tr|M0QZM1|M0QZM1_HUMAN	HNRNPM	Heterogeneous nuclear ribonucleoprotein M (Fragment)	2	107.033	98.7164	119.269	119.231	109.032	115.15	87.8068	90.6033	100.509
tr|M0R019|M0R019_HUMAN	HNRNPM	Heterogeneous nuclear ribonucleoprotein M (Fragment)	4	88.6093	91.8252	78.8814	85.9744	102.646	83.536	78.6772	89.2907	86.3238
sp|Q4KMQ1|TPRN_HUMAN	TPRN	Taperin	11	375.993	361.412	366.725	314.862	327.463	313.073	296.858	303.329	291.788
sp|Q709C8|VP13C_HUMAN	VPS13C	Vacuolar protein sorting-associated protein 13C	120	17838.3	17700	17485.8	16759.2	16735.7	16776.4	16789.4	16874.5	16723.3
sp|Q96RL7|VP13A_HUMAN	VPS13A	Vacuolar protein sorting-associated protein 13A	46	3927.31	3882.84	3829.91	3709.99	3738.65	3713.84	3755.56	3808.26	3771.52
sp|Q10471|GALT2_HUMAN	GALNT2	Polypeptide N-acetylgalactosaminyltransferase 2	70	5737.26	5780.9	5979.03	6563.58	6391.69	6396.46	5942.93	5968.17	5915.49
sp|Q8NBT0|POC1A_HUMAN	POC1A	POC1 centriolar protein homolog A	4	299.291	321.458	315.801	284.767	276.423	300.439	309.684	313.352	277.244
sp|Q8TC44|POC1B_HUMAN	POC1B	POC1 centriolar protein homolog B	4	235.659	263.042	255.558	236.239	244.433	255.749	238.679	248.276	233.791
tr|F8VUJ3|F8VUJ3_HUMAN	POC1B-GALNT4	Polypeptide N-acetylgalactosaminyltransferase	9	89.2224	96.9715	110.319	123.812	102.421	119.501	111.327	112.559	108.073
sp|Q9NVZ3|NECP2_HUMAN	NECAP2	Adaptin ear-binding coat-associated protein 2	22	4064.68	4058.01	4113.24	3973.39	3987.03	3994.64	4066.63	4182.2	4285.08
sp|Q13045|FLII_HUMAN	FLII	Protein flightless-1 homolog	81	9500.42	9414.75	9411.47	9693.82	9504.97	9486.67	9533.81	9616.71	9401.48
sp|Q9NUQ6-2|SPS2L_HUMAN	SPATS2L	Isoform 2 of SPATS2-like protein	1	25.2085	24.068	18.4992	26.7109	26.1376	22.7358	23.6987	25.7598	28.5735
sp|Q9NUQ6-3|SPS2L_HUMAN	SPATS2L	Isoform 3 of SPATS2-like protein	48	2047.79	2079.82	2321.75	2398.94	2454.28	2432.86	2241.26	2273.64	2248.46
sp|O60306|AQR_HUMAN	AQR	RNA helicase aquarius	74	7755.45	7688.89	7687.2	7589.64	7610.55	7497.15	7721.57	7640.31	7646.86
sp|Q5JTH9|RRP12_HUMAN	RRP12	RRP12-like protein	79	10235.1	10365.8	10239	10682.7	10583.7	10721.2	11030.1	10908.9	10930.3
sp|Q9Y4A5|TRRAP_HUMAN	TRRAP	Transformation/transcription domain-associated protein	138	15864.7	16113.8	15877.1	15535.1	15424	15339.6	15793.7	16041.2	16012.5
sp|P31483|TIA1_HUMAN	TIA1	Nucleolysin TIA-1 isoform p40	17	1994.8	2029.4	1966.8	2049.29	2006.79	1990.14	1967.6	1935.15	1959.7
sp|Q01085|TIAR_HUMAN	TIAL1	Nucleolysin TIAR	4	232.297	264.981	253.594	255.857	256.702	249.326	237.816	247.042	244.528
sp|Q01085-2|TIAR_HUMAN	TIAL1	Isoform 2 of Nucleolysin TIAR	30	3397.47	3446.08	3425.44	3531.08	3513.9	3617.15	3392.05	3418.24	3317.87
sp|Q15006|EMC2_HUMAN	EMC2	ER membrane protein complex subunit 2	24	1759.42	1724.55	1722.14	1666.42	1677.22	1687.35	1710.99	1693.08	1680.7
sp|P27348|1433T_HUMAN	YWHAQ	14-3-3 protein theta	67	10502.6	10450.3	10100.1	10111	10186.4	10294.2	10554.7	10385	10329
sp|P31946|1433B_HUMAN	YWHAB	14-3-3 protein beta/alpha	56	7875.43	8005.04	7942.83	7749.98	7802.7	7775.17	7894.55	7964.54	7853.28
sp|P31947|1433S_HUMAN	SFN	14-3-3 protein sigma	16	391.08	377.611	484.592	445.481	453.258	444.894	453.447	462.142	451.474
sp|P61981|1433G_HUMAN	YWHAG	14-3-3 protein gamma	74	18779	18399.9	18275.9	18070.2	18545.2	18458	18697.6	18506.6	18519.3
sp|P62258|1433E_HUMAN	YWHAE	14-3-3 protein epsilon	117	22694.2	22188.3	22330.1	20424.6	20566.1	20193.8	21599.1	21542.5	21495.2
sp|P63104|1433Z_HUMAN	YWHAZ	14-3-3 protein zeta/delta	64	14658	14736.2	14413	14466.2	14607.4	14723.3	14813.4	14642	14617.1
sp|Q04917|1433F_HUMAN	YWHAH	14-3-3 protein eta	51	11853.2	11943.1	11814.6	11698.6	11720.8	11740	12029.4	11851.8	11896
tr|E7EX29|E7EX29_HUMAN	YWHAZ	14-3-3 protein zeta/delta (Fragment)	1	81.9848	83.7151	69.6541	70.4336	74.3705	71.8434	78.5766	65.6812	76.0578
sp|Q6UWE0|LRSM1_HUMAN	LRSAM1	E3 ubiquitin-protein ligase LRSAM1	28	4960.24	5007.38	4840.01	4630.51	4741.16	4697.97	4920.96	5046.3	4940.97
sp|P49257|LMAN1_HUMAN	LMAN1	Protein ERGIC-53	60	2195.15	2202.48	2376.9	2527.5	2541.15	2480.15	2541.92	2483.94	2503.08
sp|Q2KJY2|KI26B_HUMAN	KIF26B	Kinesin-like protein KIF26B	33	3512.62	3400.43	3363.7	3370.59	3475.99	3421.44	3350.58	3389.61	3380.55
sp|Q9ULI4|KI26A_HUMAN	KIF26A	Kinesin-like protein KIF26A	16	1298.35	1284.01	1248.5	1258.72	1285.47	1243.2	1263.02	1234	1263.58
sp|Q9UMX3|BOK_HUMAN	BOK	Bcl-2-related ovarian killer protein	11	176.474	167.367	186.337	191.927	180.361	184.572	181.021	176.505	182.131
sp|P50416|CPT1A_HUMAN	CPT1A	Carnitine O-palmitoyltransferase 1, liver isoform	41	6295.62	6305.9	6213.28	6170.95	6132.63	6061.35	6214.48	6258.46	6198.13
sp|Q8IWA0|WDR75_HUMAN	WDR75	WD repeat-containing protein 75	56	3913.16	3825.81	3923.35	3993.79	3957.56	3968.02	3796.27	3874.04	3818.47
sp|O00273|DFFA_HUMAN	DFFA	DNA fragmentation factor subunit alpha	28	4348.21	4291	4300.78	4239.28	4294.12	4269.76	4366.87	4256.86	4259.82
sp|A6NKG5|RTL1_HUMAN	RTL1	Retrotransposon-like protein 1	107	26598.5	26629.7	26106.9	24053.3	24419.6	24147.2	26754.8	26518.6	26636.6
sp|P31040|SDHA_HUMAN	SDHA	Succinate dehydrogenase [ubiquinone] flavoprotein subunit, mitochondrial	46	4114.28	4091.34	4108.87	4001.85	4087.75	4034.45	4071.81	4058.06	4159.83
sp|Q08380|LG3BP_HUMAN	LGALS3BP	Galectin-3-binding protein	32	2411.03	2435.62	2442.79	2749.5	2723.11	2749.5	2382.08	2445.63	2433.3
sp|Q96T58|MINT_HUMAN	SPEN	Msx2-interacting protein	61	7267.06	7306.49	7278.28	7249.57	7086.14	7079.63	6913.72	6945.73	6945.33
sp|Q9HC52|CBX8_HUMAN	CBX8	Chromobox protein homolog 8	28	3466.07	3528.09	3444.25	3748.11	3658.17	3742.78	3604.6	3614.78	3630.62
sp|Q9UID3|VPS51_HUMAN	VPS51	Vacuolar protein sorting-associated protein 51 homolog	33	3686.88	3781.72	3747.44	3581.51	3558.79	3559.92	3792.77	3797.97	3811.65
tr|E9PMB6|E9PMB6_HUMAN	VPS51	Vacuolar protein sorting-associated protein 51 homolog (Fragment)	2	735.027	711.575	769.751	557.724	538.673	559.273	670.983	689.976	689.861
sp|Q5T5Y3-3|CAMP1_HUMAN	CAMSAP1	Isoform 3 of Calmodulin-regulated spectrin-associated protein 1	32	6112.44	6128.09	5995.93	5851.22	5942.14	5969.85	5711.87	5827.51	5885.8
sp|Q5JTZ9|SYAM_HUMAN	AARS2	Alanine--tRNA ligase, mitochondrial	49	3658.21	3643.61	3706.73	3474.04	3366.34	3475.41	3569.68	3557.7	3583.5
sp|Q8WUM0|NU133_HUMAN	NUP133	Nuclear pore complex protein Nup133	79	12441.7	12472.3	12481.7	12643.9	12637.7	12608.8	12465.2	12578.1	12485.5
sp|P51689|ARSD_HUMAN	ARSD	Arylsulfatase D	1	130.597	119.289	118.162	114.431	111.7	121.553	132.902	125.387	126.305
sp|P51690|ARSE_HUMAN	ARSE	Arylsulfatase E	13	41.9328	39.7968	66.2657	64.3053	72.2705	60.7328	62.3641	59.6822	65.8893
sp|P04406|G3P_HUMAN	GAPDH	Glyceraldehyde-3-phosphate dehydrogenase	187	25448.4	25622.7	25586.1	27174.2	27222.4	27395.7	25950.8	25752.7	25690.4
sp|Q96JH8|RADIL_HUMAN	RADIL	Ras-associating and dilute domain-containing protein	1	182.866	170.942	188.907	150.565	145.938	163.464	171.857	194.873	178.891
sp|Q4KMQ2-2|ANO6_HUMAN	ANO6	Isoform 2 of Anoctamin-6	37	5244.86	5237.63	5281.33	5109.27	5066.12	5058.93	4958.54	5019.79	5035.01
sp|O95104|SCAF4_HUMAN	SCAF4	SR-related and CTD-associated factor 4	34	4527.43	4574.87	4581.98	4281.65	4264.06	4307.62	4438.22	4467.56	4580.8
sp|Q9UPN6|SCAF8_HUMAN	SCAF8	SR-related and CTD-associated factor 8	37	4656.6	4736.64	4566.85	4193.42	4268.28	4277.48	4252.78	4230.87	4291.85
sp|Q9UHN6|CEIP2_HUMAN	CEMIP2	Cell surface hyaluronidase	44	360.814	380.507	575.496	547.842	516.129	556.852	505.873	495.595	544.855
sp|O75054-2|IGSF3_HUMAN	IGSF3	Isoform 2 of Immunoglobulin superfamily member 3	19	2853.91	2875.12	2857.29	2844.83	2852.31	2849.84	2579.3	2632.58	2610.56
sp|P00352|AL1A1_HUMAN	ALDH1A1	Retinal dehydrogenase 1	108	909.378	1035.35	1411.87	1366.62	1340.25	1357.98	1341.81	1335.56	1290.7
sp|P05091|ALDH2_HUMAN	ALDH2	Aldehyde dehydrogenase, mitochondrial	83	7580.59	7499.28	7820.58	7294.59	7347.87	7333.82	7447.38	7401.1	7317.45
sp|P30837|AL1B1_HUMAN	ALDH1B1	Aldehyde dehydrogenase X, mitochondrial	62	1272.85	1300.76	1613.78	1532.7	1524.68	1485.1	1440.83	1460.09	1439.61
sp|P47895|AL1A3_HUMAN	ALDH1A3	Aldehyde dehydrogenase family 1 member A3	13	1162.31	1106.37	1094.25	825.128	898.731	861.015	1074.16	1055	1064.79
sp|P35227|PCGF2_HUMAN	PCGF2	Polycomb group RING finger protein 2	14	2367.51	2275.13	2340.94	2259.4	2281.92	2210.01	2255.43	2098.39	2217.06
sp|Q9UBI1|COMD3_HUMAN	COMMD3	COMM domain-containing protein 3	5	848.332	876.24	863.794	786.386	796.253	828.995	812.076	798.987	796.21
tr|R4GMX3|R4GMX3_HUMAN	COMMD3-BMI1	COMMD3-BMI1 readthrough	3	566.355	543.022	514.989	588.629	559.34	555.592	538.282	555.907	560.904
sp|Q86XP3|DDX42_HUMAN	DDX42	ATP-dependent RNA helicase DDX42	86	15832.3	15584.3	15423.5	15778	15865.9	15689.5	15354.7	15515.5	15406.9
sp|Q86XP3-2|DDX42_HUMAN	DDX42	Isoform 2 of ATP-dependent RNA helicase DDX42	2	54.4366	62.7227	53.8666	47.6036	55.3579	52.5291	46.6226	52.419	51.7055
sp|Q9BTX3|TM208_HUMAN	TMEM208	Transmembrane protein 208	3	97.778	99.3699	113.339	114.103	108.451	115.957	111.836	94.571	117.737
sp|O95747|OXSR1_HUMAN	OXSR1	Serine/threonine-protein kinase OSR1	33	4562.7	4577.85	4487.05	4364.19	4374.16	4449.98	4536.29	4534.36	4525.07
sp|Q9UEW8|STK39_HUMAN	STK39	STE20/SPS1-related proline-alanine-rich protein kinase	39	4218.71	4326.46	4247.63	4225.74	4201.54	4238.16	4240.38	4221.7	4269.9
sp|Q96CT7|CC124_HUMAN	CCDC124	Coiled-coil domain-containing protein 124	24	5258.77	5352.77	5207.04	5270.16	5226.45	5355.95	4999.43	5072.66	4950.82
sp|Q7Z6Z7|HUWE1_HUMAN	HUWE1	E3 ubiquitin-protein ligase HUWE1	160	21736.4	21550.9	21373.7	20511.7	20397.9	20534.5	21466.9	21149.3	21210.7
sp|Q9UKD2|MRT4_HUMAN	MRTO4	mRNA turnover protein 4 homolog	32	5419.54	5481.71	5497.42	5672.73	5662.41	5637.73	5659.72	5733.35	5525.8
sp|P19623|SPEE_HUMAN	SRM	Spermidine synthase	60	4800.38	4762.28	4908.13	4610.73	4617.33	4563.88	4850.78	4928.63	4848.65
sp|P46940|IQGA1_HUMAN	IQGAP1	Ras GTPase-activating-like protein IQGAP1	164	25916.2	25628.1	25536.7	27463.4	27574	27346.9	27465.4	27477.6	27421
sp|Q13576|IQGA2_HUMAN	IQGAP2	Ras GTPase-activating-like protein IQGAP2	95	2416.63	2521.16	3058.29	3100.29	3027.16	3017.32	3116.01	3118.09	3146.07
sp|Q86VI3|IQGA3_HUMAN	IQGAP3	Ras GTPase-activating-like protein IQGAP3	68	12451.2	12506.9	12351	10877.3	11005.6	11100.1	11988.1	12019.8	12108.6
sp|Q6STE5|SMRD3_HUMAN	SMARCD3	SWI/SNF-related matrix-associated actin-dependent regulator of chromatin subfamily D member 3	19	3542.42	3492.22	3565.97	3489.07	3474.44	3413.41	3543.7	3610.57	3676.96
sp|Q92925|SMRD2_HUMAN	SMARCD2	SWI/SNF-related matrix-associated actin-dependent regulator of chromatin subfamily D member 2	18	2518.13	2529.38	2503.51	2572.04	2539.06	2497.06	2547.44	2484.78	2548.82
sp|Q96GM5|SMRD1_HUMAN	SMARCD1	SWI/SNF-related matrix-associated actin-dependent regulator of chromatin subfamily D member 1	39	6168.06	6199.06	6107.73	6110.04	6052.17	6100.82	6108.54	6081.97	6076.11
sp|A6NCS6|CB072_HUMAN	C2orf72	Uncharacterized protein C2orf72	11	124.498	115.937	124.702	162.029	147.725	156.214	118.385	124.495	141.009
sp|Q96H55|MYO19_HUMAN	MYO19	Unconventional myosin-XIX	20	1529.02	1509.78	1490.86	1458.91	1406.84	1423.83	1499.78	1554.25	1611.88
sp|P56270-2|MAZ_HUMAN	MAZ	Isoform 2 of Myc-associated zinc finger protein	5	565.184	559.085	523.12	543	487.99	510.066	494.169	492.228	471.378
sp|Q14119|VEZF1_HUMAN	VEZF1	Vascular endothelial zinc finger 1	20	7516.91	7314.13	7459.05	7145.67	7231.48	7183.44	7098.21	7140.55	7377.19
sp|Q9HBE1|PATZ1_HUMAN	PATZ1	POZ-, AT hook-, and zinc finger-containing protein 1	16	1921.72	1862.59	1969.59	1838.76	1871.99	1843.6	1922.19	1919.52	1849.96
sp|O00257|CBX4_HUMAN	CBX4	E3 SUMO-protein ligase CBX4	11	557.72	551.713	544.931	518.879	544.601	572.023	503.687	536.311	536.92
sp|Q9BZV1|UBXN6_HUMAN	UBXN6	UBX domain-containing protein 6	16	1809.02	1789.14	1818.92	1710.8	1755.47	1718.45	1792.38	1742.78	1818.63
sp|P10412|H14_HUMAN	H1-4	Histone H1.4	23	3603.54	3413.32	3752.19	4772.41	4538.11	4363.24	4310.31	4246.78	4210.44
sp|P16401|H15_HUMAN	H1-5	Histone H1.5	37	8618.92	8471.75	8410.73	10290.2	10380.2	10343.6	9949.85	9674.29	9787.67
sp|P16402|H13_HUMAN	H1-3	Histone H1.3	52	10043.1	9978.92	10055.3	11866	12127.7	11865.8	11328.7	11567.3	11305.1
sp|P16403|H12_HUMAN	H1-2	Histone H1.2	3	653.588	688.763	676.023	854.711	838.26	843.443	800.278	765.042	779.95
sp|P22492|H1T_HUMAN	HIST1H1T	Histone H1t	1	41.0356	35.1309	37.9964	40.9299	38.5938	41.2897	35.2658	42.3372	34.6678
sp|O75175|CNOT3_HUMAN	CNOT3	CCR4-NOT transcription complex subunit 3	15	1858.17	1908.25	1824.54	1804.72	1834.2	1850.19	1813.57	1865.72	1831.43
sp|Q9NSD9|SYFB_HUMAN	FARSB	Phenylalanine--tRNA ligase beta subunit	83	8706.41	8649.4	8693.64	8611.44	8527.07	8598.89	8747.56	8790.2	8800.01
sp|P52758|RIDA_HUMAN	RIDA	2-iminobutanoate/2-iminopropanoate deaminase	9	724.536	703.8	726.899	718.924	721.397	704.312	686.305	705.56	658.936
sp|Q9Y315|DEOC_HUMAN	DERA	Deoxyribose-phosphate aldolase	20	1982.67	2020.72	2014.98	1947	1969.63	1950.45	2082.82	2170.18	2139.62
sp|Q3LXA3|TKFC_HUMAN	TKFC	Triokinase/FMN cyclase	75	1499.06	1530.71	1814.2	1752.74	1781.15	1737.97	1879.16	1882.62	1882.99
sp|O75150|BRE1B_HUMAN	RNF40	E3 ubiquitin-protein ligase BRE1B	61	11692.4	11545.1	11363	11242.9	11210.8	11329.2	11363.3	11394.7	11293.4
sp|Q5VTR2|BRE1A_HUMAN	RNF20	E3 ubiquitin-protein ligase BRE1A	64	11637.5	11537.5	11371.5	11448.9	11496.4	11456.3	11211.1	11210.9	11199
sp|Q86UP2|KTN1_HUMAN	KTN1	Kinectin	157	24132.9	24357.4	24240.6	26883	26821.2	26733.9	26131.8	26332.4	26418.8
sp|Q9Y4F3|MARF1_HUMAN	MARF1	Meiosis regulator and mRNA stability factor 1	12	833.653	824.378	807.894	815.68	801.257	795.112	822.765	803.576	810.509
sp|Q99543|DNJC2_HUMAN	DNAJC2	DnaJ homolog subfamily C member 2	48	6658.38	6735.12	6812.43	6660.83	6542.96	6624.69	6413.48	6493.4	6508.99
sp|Q9Y5K8|VATD_HUMAN	ATP6V1D	V-type proton ATPase subunit D	23	3054.88	3055.49	3052.89	2969.05	2983.52	2898.05	3018.77	2998.68	3034.9
sp|O95786|DDX58_HUMAN	DDX58	Antiviral innate immune response receptor RIG-I	22	1032.32	1064.48	1065.54	1045.83	1093.32	1050.37	1076.86	1068.35	1074.55
sp|Q0VDF9|HSP7E_HUMAN	HSPA14	Heat shock 70 kDa protein 14	62	8474.4	8519.1	8431.62	8427.05	8638.66	8393.75	8456.89	8488.22	8643.63
sp|P46977|STT3A_HUMAN	STT3A	Dolichyl-diphosphooligosaccharide--protein glycosyltransferase subunit STT3A	44	3553.1	3532.79	3750.84	4070.12	3980.77	4014.13	3648.25	3620.67	3588.92
sp|Q8TCJ2|STT3B_HUMAN	STT3B	Dolichyl-diphosphooligosaccharide--protein glycosyltransferase subunit STT3B	33	2762.13	2837.01	2921.15	3208.93	3095.64	3115.19	3241.81	3209.95	3247.36
sp|P56182|RRP1_HUMAN	RRP1	Ribosomal RNA processing protein 1 homolog A	22	3278.26	3288.38	3319.76	3354.29	3331.04	3297.24	3394.36	3392.2	3495.73
sp|Q92499|DDX1_HUMAN	DDX1	ATP-dependent RNA helicase DDX1	103	16965.5	16969.7	16722.8	16828	16901.1	16942	16989.8	16766.4	16804
sp|P46926|GNPI1_HUMAN	GNPDA1	Glucosamine-6-phosphate isomerase 1	18	2927.86	2850.83	2887.19	3076.9	3008.27	3013.08	2886.6	2895.2	2856.54
sp|Q8TDQ7|GNPI2_HUMAN	GNPDA2	Glucosamine-6-phosphate isomerase 2	13	874.599	905.302	931.472	823.485	820.975	876.643	920.599	898.124	907.274
sp|Q8IYS2-2|K2013_HUMAN	KIAA2013	Isoform 2 of Uncharacterized protein KIAA2013	20	938.898	879.458	978.938	1062.07	1046.68	1070.41	947.693	963.152	1003.05
sp|P48634|PRC2A_HUMAN	PRRC2A	Protein PRRC2A	59	6428.11	6338.51	6340.45	6084.32	6150.99	6227.13	5910.69	6055.36	6000.07
sp|Q5JSZ5|PRC2B_HUMAN	PRRC2B	Protein PRRC2B	38	5929.67	5866.06	5964.37	5816.62	5830.21	5828.79	5236.84	5367.67	5253.18
sp|Q9Y520-4|PRC2C_HUMAN	PRRC2C	Isoform 4 of Protein PRRC2C	109	18183.3	18071.2	18066.3	18400.8	18417.9	18463.3	17524.3	17530.4	17717.4
sp|Q7Z624|CMKMT_HUMAN	CAMKMT	Calmodulin-lysine N-methyltransferase	5	207.854	200.415	225.677	200.699	212.821	200.926	192.255	197.13	206.515
sp|P28838|AMPL_HUMAN	LAP3	Cytosol aminopeptidase	104	10388.7	10362.4	10514.8	10373.3	10354.7	10345.8	10364.6	10382.5	10115.8
tr|H0Y9Q1|H0Y9Q1_HUMAN	LAP3	Cytosol aminopeptidase (Fragment)	2	219.01	236.971	247.687	230.363	231.501	231.378	280.034	261.24	267.151
sp|Q7Z449|CP2U1_HUMAN	CYP2U1	Cytochrome P450 2U1	6	588.423	613.907	600.59	693.637	696.264	688.782	644.539	658.125	668.804
sp|P30566|PUR8_HUMAN	ADSL	Adenylosuccinate lyase	13	1636.58	1688.79	1701.95	1742.39	1808.09	1756.56	1861.08	1906.75	1939.17
sp|O75533|SF3B1_HUMAN	SF3B1	Splicing factor 3B subunit 1	120	15575.8	15700.4	15787.9	15469	15587.4	15409	15438.4	15402.6	15425.8
sp|P23443|KS6B1_HUMAN	RPS6KB1	Ribosomal protein S6 kinase beta-1	21	1832.64	1835.5	1858.3	1802.38	1855.95	1828.01	1943.55	1898.77	1941.91
sp|P31749|AKT1_HUMAN	AKT1	RAC-alpha serine/threonine-protein kinase	22	4910.2	4849.32	4929.84	4579.96	4635.17	4614.1	4866.46	4879.86	4963.87
sp|P31751|AKT2_HUMAN	AKT2	RAC-beta serine/threonine-protein kinase	8	922.012	927.676	883.339	879.18	894.984	868.335	906.51	888.622	931.953
sp|Q9UBS0|KS6B2_HUMAN	RPS6KB2	Ribosomal protein S6 kinase beta-2	10	411.66	392.4	390.289	366.858	411.163	385.303	395.367	403.82	436.487
sp|Q9Y243|AKT3_HUMAN	AKT3	RAC-gamma serine/threonine-protein kinase	22	4792.83	4672.05	4664	4345.36	4387.74	4322.57	4537.15	4489.31	4523.18
sp|O95714|HERC2_HUMAN	HERC2	E3 ubiquitin-protein ligase HERC2	64	6725.49	6856.76	6757.79	6592.31	6537.97	6609.07	6678.1	6671.49	6746.52
sp|Q8N729|NPW_HUMAN	NPW	Neuropeptide W	1	17.6946	17.0768	17.3259	13.473	13.7492	8.9039	14.1398	12.8316	14.5175
sp|P07199|CENPB_HUMAN	CENPB	Major centromere autoantigen B	17	2549.62	2446.95	2417.36	2370.79	2364.54	2318.2	2421.04	2434.47	2410.92
sp|Q8IUD2|RB6I2_HUMAN	ERC1	ELKS/Rab6-interacting/CAST family member 1	31	7058.7	6993.11	6870.9	6820.91	6831.66	6814.05	6887.45	6830.95	6868.8
sp|O00488|ZN593_HUMAN	ZNF593	Zinc finger protein 593	7	466.296	495.511	460.193	471.914	490.103	492.51	484.905	480.55	448.331
sp|Q13144|EI2BE_HUMAN	EIF2B5	Translation initiation factor eIF-2B subunit epsilon	22	3615.56	3643.59	3630.35	3558.97	3475.3	3591.07	3686.21	3655.48	3723.99
sp|Q460N5|PAR14_HUMAN	PARP14	Protein mono-ADP-ribosyltransferase PARP14	6	63.0354	66.4561	92.448	73.4867	76.3961	85.1083	72.8459	64.1087	77.7644
sp|Q9BQ69|MACD1_HUMAN	MACROD1	ADP-ribose glycohydrolase MACROD1	16	3003.48	2983.83	2914.23	2709.8	2694.27	2627.82	2819.95	2783.67	2812.29
sp|P20618|PSB1_HUMAN	PSMB1	Proteasome subunit beta type-1	33	3697.25	3799.85	3745.26	3893.7	3927.05	3960.02	3748.09	3722.79	3790.22
sp|P27694|RFA1_HUMAN	RPA1	Replication protein A 70 kDa DNA-binding subunit	80	15424.8	15201.4	15181.5	15178.7	15187.4	15020.1	15546.5	15184.3	15188.9
sp|O14976|GAK_HUMAN	GAK	Cyclin-G-associated kinase	51	6169.89	6130.12	6087.58	6125.68	6087.76	6006.47	5922.38	6060.01	6044.2
sp|Q99426|TBCB_HUMAN	TBCB	Tubulin-folding cofactor B	24	3694.35	3780.61	3766.25	3464.46	3531.97	3497.32	3608.37	3698.41	3688.42
sp|Q7L1T6|NB5R4_HUMAN	CYB5R4	Cytochrome b5 reductase 4	23	2541.02	2591.81	2575.78	2442.74	2499.14	2440.47	2483.49	2536.54	2530.95
sp|O75369|FLNB_HUMAN	FLNB	Filamin-B	2	16.7324	21.6219	19.5091	27.1585	17.0851	21.3183	19.4196	22.597	20.2454
sp|O75369-8|FLNB_HUMAN	FLNB	Isoform 8 of Filamin-B	202	20341.6	20148.5	20881	21330.1	21462.9	21184.1	20891.6	20857.9	21012.8
sp|P21333|FLNA_HUMAN	FLNA	Filamin-A	249	50794.9	50974.4	50274.3	50473.2	50453	50449.9	50936.5	50721.1	50942.3
sp|Q14315|FLNC_HUMAN	FLNC	Filamin-C	106	21023.6	20986	20873.1	20978.3	20969.3	21112.9	20668.1	20571.6	20826.4
sp|Q96GM8|TOE1_HUMAN	TOE1	Target of EGR1 protein 1	19	1383.52	1415.49	1471.24	1396.16	1429.93	1411.64	1470.64	1477.55	1432.85
sp|Q9BZE9-2|ASPC1_HUMAN	ASPSCR1	Isoform 2 of Tether containing UBX domain for GLUT4	24	2984.29	3023.81	3072.47	3015.93	3006.25	2922.03	3033.51	3006.6	3089.95
sp|P60468|SC61B_HUMAN	SEC61B	Protein transport protein Sec61 subunit beta	12	1374.17	1383.03	1418.9	1790.77	1806.6	1761.12	1630.26	1641.52	1592.06
sp|Q9Y3D6|FIS1_HUMAN	FIS1	Mitochondrial fission 1 protein	24	9772.69	9763.82	9951.15	9228.22	9516.97	9522.68	9698.87	9760.31	9944.67
sp|O43281|EFS_HUMAN	EFS	Embryonal Fyn-associated substrate	15	1496.36	1517.11	1508.4	1530.84	1481.43	1502.43	1431.13	1445.1	1430.09
sp|Q5T653|RM02_HUMAN	MRPL2	39S ribosomal protein L2, mitochondrial	21	1240.32	1224.24	1244.59	1244.26	1267.12	1236.03	1243.97	1247.64	1246.85
sp|Q8N5M9|JAGN1_HUMAN	JAGN1	Protein jagunal homolog 1	6	683.946	634.381	711.179	755.28	741.33	774.747	754.618	740.126	735.096
sp|O43909|EXTL3_HUMAN	EXTL3	Exostosin-like 3	13	1361.94	1331.78	1346.03	1382.28	1459.19	1429.64	1348.96	1379.56	1373.43
sp|P10586|PTPRF_HUMAN	PTPRF	Receptor-type tyrosine-protein phosphatase F	21	457.361	462.564	556.145	507.467	532.345	545.3	430.334	406.159	412.973
sp|Q13332|PTPRS_HUMAN	PTPRS	Receptor-type tyrosine-protein phosphatase S	14	711.677	665.53	725.05	704.235	713.729	726.782	628.27	647.907	635.795
sp|P23508|CRCM_HUMAN	MCC	Colorectal mutant cancer protein	19	2451.02	2476.19	2487.9	2491.14	2526.97	2546.34	2419.96	2495.77	2481.64
sp|Q96EN8|MOCOS_HUMAN	MOCOS	Molybdenum cofactor sulfurase	26	861.781	935.808	935.816	882.549	883.976	914.906	942.233	956.071	925.087
sp|Q8IUC4|RHPN2_HUMAN	RHPN2	Rhophilin-2	23	963.823	960.254	938.234	1006.17	1005.42	1021.69	976.094	1015.2	971.967
sp|P05386|RLA1_HUMAN	RPLP1	60S acidic ribosomal protein P1	19	1360.4	1454.1	1388.64	1286.4	1280.99	1285.02	1335.73	1312.7	1313.34
sp|P05387|RLA2_HUMAN	RPLP2	60S acidic ribosomal protein P2	46	5827.99	5991.35	5881.87	6613.84	6539.64	6605.1	6849.26	6889.29	6997.27
sp|P98160|PGBM_HUMAN	HSPG2	Basement membrane-specific heparan sulfate proteoglycan core protein	31	249.501	264.488	294.831	291.177	286.096	277.535	276.456	284.893	278.474
sp|Q9Y230|RUVB2_HUMAN	RUVBL2	RuvB-like 2	86	15836	15841.2	15347.9	15162.3	15279.6	15262	15724.4	15499.8	15444
sp|P61457|PHS_HUMAN	PCBD1	Pterin-4-alpha-carbinolamine dehydratase	16	1013.98	998.283	1026.16	868.401	862.485	848.388	920.68	903.929	876.829
sp|Q9H0N5|PHS2_HUMAN	PCBD2	Pterin-4-alpha-carbinolamine dehydratase 2	10	1411.2	1387.95	1366.19	1214.35	1221.34	1255.99	1251.99	1225.52	1238.35
sp|P33316|DUT_HUMAN	DUT	Deoxyuridine 5'-triphosphate nucleotidohydrolase, mitochondrial	17	2665.65	2647.74	2614.91	2532.58	2551.63	2496.9	2563.88	2537.31	2568.64
sp|Q9H9Y6-3|RPA2_HUMAN	POLR1B	Isoform 3 of DNA-directed RNA polymerase I subunit RPA2	38	4446.07	4520.59	4445.7	4566.43	4618.98	4573.22	4640.88	4728.97	4638.77
sp|P62491|RB11A_HUMAN	RAB11A	Ras-related protein Rab-11A	7	150.832	151.412	148.744	169.334	155.661	157.201	162.568	152.019	157.656
sp|Q15907|RB11B_HUMAN	RAB11B	Ras-related protein Rab-11B	50	8417.12	8646.14	8424.76	8830.39	8685.48	8843.22	8532.91	8628.11	8468.47
sp|Q9H444|CHM4B_HUMAN	CHMP4B	Charged multivesicular body protein 4b	25	3129.3	3220.25	3108.28	3213.24	3260.76	3224.25	3122.16	3146.14	3228.88
sp|Q8TEX9-2|IPO4_HUMAN	IPO4	Isoform 2 of Importin-4	94	7549.15	7542.23	7932.19	7624.68	7578.79	7710.64	8069	8061.99	8184.15
sp|O14646|CHD1_HUMAN	CHD1	Chromodomain-helicase-DNA-binding protein 1	49	7050.66	6960.56	7100.53	7375.75	7412.71	7421.23	7506.79	7451.08	7603.07
sp|O14647|CHD2_HUMAN	CHD2	Chromodomain-helicase-DNA-binding protein 2	44	4423.52	4481.05	4515.96	4641.76	4557.49	4483.1	4608.27	4726.29	4568.01
sp|Q3L8U1|CHD9_HUMAN	CHD9	Chromodomain-helicase-DNA-binding protein 9	30	2476.93	2445.8	2346.51	2479.87	2429.66	2484.08	2485.28	2463.2	2499.21
sp|Q8TD26|CHD6_HUMAN	CHD6	Chromodomain-helicase-DNA-binding protein 6	24	1812.3	1805.78	1772.37	1815.9	1828.41	1784.59	1890.51	1923.96	1924.24
sp|Q9HCK8|CHD8_HUMAN	CHD8	Chromodomain-helicase-DNA-binding protein 8	64	5398.76	5278.87	5400.58	5222.76	5199.88	5242.5	5198.92	5306.09	5258.19
sp|Q9P2D1|CHD7_HUMAN	CHD7	Chromodomain-helicase-DNA-binding protein 7	48	3696.77	3606.76	3665.07	3967.27	4013.73	3983.53	3889.56	3867.75	3927.72
tr|A0A087WVF4|A0A087WVF4_HUMAN	CHD1	Chromodomain-helicase-DNA-binding protein 1 (Fragment)	2	54.2646	46.9307	43.3183	57.7758	58.9808	48.2788	51.8648	45.5539	47.4933
sp|Q9UJX2|CDC23_HUMAN	CDC23	Cell division cycle protein 23 homolog	34	3362.96	3327.71	3366.03	3159.51	3259.81	3161.21	3283.85	3383.51	3375.6
sp|P13591-1|NCAM1_HUMAN	NCAM1	Isoform 2 of Neural cell adhesion molecule 1	21	9366.03	8973.72	9036.83	8910.88	9246.61	9020.24	8234.62	7828.86	8025.58
tr|A0A0D9SF30|A0A0D9SF30_HUMAN	NCAM1	Neural cell adhesion molecule 1 (Fragment)	5	1791.79	1749.68	1750.44	1914.51	1840.85	1896.74	1777.52	1760.22	1764.11
sp|O75410-2|TACC1_HUMAN	TACC1	Isoform 2 of Transforming acidic coiled-coil-containing protein 1	10	567.469	578.639	629.397	643.883	600.936	663.428	586.713	597.633	624.529
sp|O95359|TACC2_HUMAN	TACC2	Transforming acidic coiled-coil-containing protein 2	5	92.814	82.8083	101.689	106.174	86.9566	96.2491	90.1934	89.8353	81.5993
sp|Q15021|CND1_HUMAN	NCAPD2	Condensin complex subunit 1	111	15158.6	15187.9	15057.9	14809.2	14960.1	14952.5	15164.8	15244.8	15274.5
sp|Q15833-3|STXB2_HUMAN	STXBP2	Isoform 3 of Syntaxin-binding protein 2	26	294.458	284.186	382.337	385.977	364.711	415.555	366.956	353.128	353.519
sp|O43795|MYO1B_HUMAN	MYO1B	Unconventional myosin-Ib	119	17885.1	17876.7	17803.7	19574.8	19689.7	19660.8	18406	18259.8	18390.7
sp|Q9UBC5|MYO1A_HUMAN	MYO1A	Unconventional myosin-Ia	2	21.7799	17.7968	24.7802	22.9672	20.1474	15.0762	19.1297	20.1232	23.8712
tr|C9K0I9|C9K0I9_HUMAN	MYO1B	Unconventional myosin-Ib (Fragment)	3	733.01	707.562	690.472	711.646	710.097	682.748	737.429	685.936	711.003
sp|Q9UQ80|PA2G4_HUMAN	PA2G4	Proliferation-associated protein 2G4	101	15153	14909.8	14940.2	14954.1	15186.6	15222.4	15382.4	15026.3	14916.8
sp|Q9BRD0|BUD13_HUMAN	BUD13	BUD13 homolog	14	2113.3	2169.24	2105.91	2057.98	2056.85	2172.7	1939.33	1955.86	1956.4
sp|P78371|TCPB_HUMAN	CCT2	T-complex protein 1 subunit beta	120	22463.4	22518.5	22558.6	22970.9	23114.9	23269.1	22809.2	22471.6	22644
sp|P61764|STXB1_HUMAN	STXBP1	Syntaxin-binding protein 1	17	3128.58	3194.56	3118.1	3096.65	2982.47	3112.9	3091.78	3091.94	3124.49
sp|O14795-2|UN13B_HUMAN	UNC13B	Isoform 2 of Protein unc-13 homolog B	14	925.58	997.081	948.37	877.551	916.275	918.254	937.955	914.539	926.085
sp|Q5SRE5|NU188_HUMAN	NUP188	Nucleoporin NUP188 homolog	60	8636.96	8646.94	8616	8448.05	8479.1	8466.05	8693	8603.98	8801.93
sp|Q2TAY7|SMU1_HUMAN	SMU1	WD40 repeat-containing protein SMU1	51	6096.34	6186.44	6259.84	6281.06	6306.08	6380.71	6314.23	6252.36	6347.92
sp|Q96PK6|RBM14_HUMAN	RBM14	RNA-binding protein 14	58	10961.4	10998	10962	10080.1	10168.1	10254.8	9750.23	9713.48	9759.44
sp|Q9BQ04|RBM4B_HUMAN	RBM4B	RNA-binding protein 4B	7	713.527	695.798	697.135	675.646	657.081	697.474	626.948	650.671	679.48
sp|Q9BWF3|RBM4_HUMAN	RBM4	RNA-binding protein 4	22	4231.39	4194.77	4063.1	4114.17	4223.77	4245.05	4066.31	4005.34	3964
sp|P08319-2|ADH4_HUMAN	ADH4	Isoform 2 of All-trans-retinol dehydrogenase [NAD(+)] ADH4	32	250.08	286.704	446.66	421.863	403.468	405.616	385.554	388.872	384.556
sp|P35637|FUS_HUMAN	FUS	RNA-binding protein FUS	44	6211.86	6110.29	6285.47	5982.61	6088.24	5949.26	5980.43	6046.81	6060.36
sp|Q92804|RBP56_HUMAN	TAF15	TATA-binding protein-associated factor 2N	33	5999.34	6125.24	6035.03	5822.76	5826.69	5843.3	5872.85	5955.87	5979.92
tr|H3BPE7|H3BPE7_HUMAN	FUS	RNA-binding protein FUS	1	15.1357	17.84	20.2432	11.5677	11.3806	14.556	9.73055	12.2452	15.1999
sp|Q9UHB9|SRP68_HUMAN	SRP68	Signal recognition particle subunit SRP68	68	7009.7	7027.94	6903.13	7383.81	7401.6	7220.66	7195.87	7341.31	7219.5
sp|Q6ZMI0|PPR21_HUMAN	PPP1R21	Protein phosphatase 1 regulatory subunit 21	25	3144.95	3139.87	3092.9	3073.77	3004.25	3007.87	3161.4	3250.29	3258.6
sp|Q96RK4-2|BBS4_HUMAN	BBS4	Isoform 2 of Bardet-Biedl syndrome 4 protein	4	522.542	537.317	527.965	446.14	463.962	482.602	501.342	515.232	502.185
sp|P50851|LRBA_HUMAN	LRBA	Lipopolysaccharide-responsive and beige-like anchor protein	36	2181.74	2180.9	2195.43	2103.19	2042.81	2102.4	2111.13	2238.44	2151.41
sp|Q8NFP9|NBEA_HUMAN	NBEA	Neurobeachin	35	5362.54	5292.51	5379.18	5160.61	5191.08	5182.9	5275.05	5359.84	5387.53
sp|Q86WT1|TT30A_HUMAN	TTC30A	Tetratricopeptide repeat protein 30A	5	308.513	327.2	318.827	298.541	290.248	306.968	320.571	322.594	312.22
sp|Q9Y2W6|TDRKH_HUMAN	TDRKH	Tudor and KH domain-containing protein	17	3722.15	3572.65	3610.25	3194.42	3245.15	3231.81	3351.51	3459.88	3412.49
sp|O43439-4|MTG8R_HUMAN	CBFA2T2	Isoform 4 of Protein CBFA2T2	7	1239.23	1250.87	1201.74	1112.09	1119.59	1150.75	1154.98	1230.27	1229.04
sp|P48506|GSH1_HUMAN	GCLC	Glutamate--cysteine ligase catalytic subunit	21	1097.48	1076.78	1138.28	1145.62	1142.93	1133.88	1134.23	1156.39	1138.39
sp|Q04637-8|IF4G1_HUMAN	EIF4G1	Isoform 8 of Eukaryotic translation initiation factor 4 gamma 1	1	42.1758	42.816	41.748	41.763	45.2349	47.3761	43.7141	43.0328	40.6651
sp|Q04637-9|IF4G1_HUMAN	EIF4G1	Isoform 9 of Eukaryotic translation initiation factor 4 gamma 1	70	11522.1	11396.3	11666.7	12024.6	11858.7	11740.1	11743.2	11755.5	11520
tr|A0A0A0MSA7|A0A0A0MSA7_HUMAN	EIF4G3	Eukaryotic translation initiation factor 4 gamma 3	6	333.749	349.781	373.406	320.226	336.058	328.702	331.685	316.412	330.88
tr|A0A0U1RQK7|A0A0U1RQK7_HUMAN	EIF4G3	Eukaryotic translation initiation factor 4 gamma 3	47	7566.19	7649.89	7383.78	7160.45	7241.37	7420.81	7133.83	7156.25	7250.48
sp|Q6YHU6|THADA_HUMAN	THADA	Thyroid adenoma-associated protein	55	4839.93	4954.11	4825.17	4604.43	4570.17	4663.65	4897.4	5027.21	4878.61
sp|O14744|ANM5_HUMAN	PRMT5	Protein arginine N-methyltransferase 5	40	2916.32	2958.76	3064.45	3079.23	3025.45	3071.53	3155.63	3185.04	3107.31
sp|Q12980|NPRL3_HUMAN	NPRL3	GATOR complex protein NPRL3	7	653.05	652.005	672.917	632.863	593.74	612.737	633.125	641.995	620.278
sp|Q02318|CP27A_HUMAN	CYP27A1	Sterol 26-hydroxylase, mitochondrial	39	251.253	274.724	420.5	385.666	370.922	399.884	382.341	371.048	361.346
sp|Q6TFL4|KLH24_HUMAN	KLHL24	Kelch-like protein 24	2	198.642	202.552	182.338	173.115	206.222	203.344	186.814	173.087	188.768
sp|O43663|PRC1_HUMAN	PRC1	Protein regulator of cytokinesis 1	28	3069.38	3046.27	3012.39	3130.82	3076.01	3103.42	2850.33	2906.58	2912.42
sp|Q96I25|SPF45_HUMAN	RBM17	Splicing factor 45	31	4941.21	4957.25	4965.65	5248.29	5270.07	5180.39	4963.62	5025.62	5011.12
sp|Q8N766|EMC1_HUMAN	EMC1	ER membrane protein complex subunit 1	51	3198.99	3264.88	3340.57	3716.68	3662.26	3579.92	3564.81	3664.68	3617.69
tr|A0A286YEW0|A0A286YEW0_HUMAN	EMC1	ER membrane protein complex subunit 1 (Fragment)	2	464.002	500.552	474.534	503.596	525.003	550.889	516.096	536.194	546.103
sp|Q9UPN4|CP131_HUMAN	CEP131	Centrosomal protein of 131 kDa	32	3963.12	3953.25	3960.12	3826.8	3837.69	3866.73	3674.2	3761.16	3702.85
sp|Q9UPN4-2|CP131_HUMAN	CEP131	Isoform 2 of Centrosomal protein of 131 kDa	1	15.1921	18.9098	14.4741	18.5993	16.4843	17.918	22.4575	16.9739	18.4019
sp|O60645|EXOC3_HUMAN	EXOC3	Exocyst complex component 3	43	5736.02	5798.41	5724.98	5666.74	5636.43	5628.34	5712.86	5672.14	5673.39
sp|Q7Z3J2|VP35L_HUMAN	VPS35L	VPS35 endosomal protein sorting factor-like	9	2282.73	2291.39	2201.72	2031.99	2059.59	2041.55	2255.76	2221.43	2259.4
sp|Q9UNX4|WDR3_HUMAN	WDR3	WD repeat-containing protein 3	93	8924.8	8911.58	9086.03	8942.64	9000.94	8898.57	9103.48	9221.54	9244.19
sp|Q8NBJ9-2|SIDT2_HUMAN	SIDT2	Isoform 2 of SID1 transmembrane family member 2	2	32.8109	30.177	34.7423	25.0256	24.5489	27.6279	26.9239	26.6873	28.5785
sp|Q969Q5|RAB24_HUMAN	RAB24	Ras-related protein Rab-24	14	1801.06	1848.42	1817.74	1866.46	1799.39	1767.37	1800.94	1874.48	1849.91
sp|O43567|RNF13_HUMAN	RNF13	E3 ubiquitin-protein ligase RNF13	3	352.82	359.809	349.283	409.984	409.081	390.689	330.629	361.258	331.035
sp|P62913|RL11_HUMAN	RPL11	60S ribosomal protein L11	42	5068.88	5118.65	5111.15	5017.69	4941.22	5004.86	4955.43	5052.47	5160.64
sp|A6NKD9|CC85C_HUMAN	CCDC85C	Coiled-coil domain-containing protein 85C	12	1009.85	981.457	992.02	943.06	937.621	909.326	867.07	848.873	842.994
sp|P15311|EZRI_HUMAN	EZR	Ezrin	93	11639.7	11975.3	11855.4	11749	11763.3	11553.8	11392.9	11498.4	11314.8
sp|P26038|MOES_HUMAN	MSN	Moesin	4	677.964	657.135	627.867	611.059	612.793	616.974	640.373	596.51	591.847
sp|P35241|RADI_HUMAN	RDX	Radixin	54	8903.86	8990.06	8927.45	8845.8	8929.55	8866.64	8826.06	8756.02	8813.49
sp|Q5TZA2|CROCC_HUMAN	CROCC	Rootletin	11	1183.45	1193.32	1162.9	1083.42	1117.41	1088.21	1109.14	1128.79	1099.5
sp|Q69YQ0|CYTSA_HUMAN	SPECC1L	Cytospin-A	53	7848.45	7672.53	7505.33	7887.5	7981.43	7918.4	7607.66	7506.09	7551.6
sp|Q9HA77|SYCM_HUMAN	CARS2	Probable cysteine--tRNA ligase, mitochondrial	27	1288.67	1331.59	1375.35	1307.99	1296.47	1317.71	1269.39	1304.92	1260.32
sp|Q9HC35|EMAL4_HUMAN	EML4	Echinoderm microtubule-associated protein-like 4	102	15776.5	15720.9	15972.1	15964.4	15933.5	15945.6	16233.6	16460.7	16396.1
tr|B5MBZ0|B5MBZ0_HUMAN	EML4	Echinoderm microtubule-associated protein-like 4	2	457.622	453.709	496.355	456.449	439.29	452.606	491.765	481.019	486.887
sp|O94887|FARP2_HUMAN	FARP2	FERM, ARHGEF and pleckstrin domain-containing protein 2	17	1232.46	1288.18	1279.18	1276.03	1219.05	1275.92	1237.07	1273.82	1263.37
sp|Q9Y4F1-2|FARP1_HUMAN	FARP1	Isoform 2 of FERM, ARHGEF and pleckstrin domain-containing protein 1	56	3202.72	3210.54	3329.68	3324.44	3285.55	3237.34	3178.78	3178.12	3183
tr|H7C3M7|H7C3M7_HUMAN	FARP2	FERM, ARHGEF and pleckstrin domain-containing protein 2 (Fragment)	5	576.835	577.383	587.309	503.368	512.346	503.399	459.289	480.044	449.864
sp|Q96SY0|INT14_HUMAN	INTS14	Integrator complex subunit 14	17	3000.98	2999.4	3056.17	2885.47	2895.63	2962.93	3040.74	3045.18	3047.46
sp|Q15102|PA1B3_HUMAN	PAFAH1B3	Platelet-activating factor acetylhydrolase IB subunit gamma	14	2716.17	2668.07	2593.97	2440.03	2449.38	2411.17	2635.9	2625.64	2635.89
sp|O00151|PDLI1_HUMAN	PDLIM1	PDZ and LIM domain protein 1	54	4043.87	4068.92	4316.07	4548.04	4413.94	4445.48	4152.04	4184.42	4212.53
sp|Q13428-3|TCOF_HUMAN	TCOF1	Isoform 3 of Treacle protein	104	32400.6	32143.8	31922.4	33315.1	33573.5	33438.3	32748.2	32777.6	33069.4
sp|Q13428-7|TCOF_HUMAN	TCOF1	Isoform 7 of Treacle protein	5	207.072	218.774	237.268	211.723	214.373	214.272	218.805	230.197	219.792
sp|Q6ZMZ3|SYNE3_HUMAN	SYNE3	Nesprin-3	39	2143.56	2135.21	2185.48	2294.39	2288.88	2300.46	2425.34	2422.39	2414.96
sp|Q6ZMZ3-2|SYNE3_HUMAN	SYNE3	Isoform 2 of Nesprin-3	1	87.9813	85.8306	84.1348	101.717	86.1694	81.5717	90.4207	99.4488	93.7916
sp|P20248|CCNA2_HUMAN	CCNA2	Cyclin-A2	16	2171.23	2136.36	2161.79	2233.17	2214.71	2231.67	2045.86	2084.62	2114.9
sp|O43747-2|AP1G1_HUMAN	AP1G1	Isoform 2 of AP-1 complex subunit gamma-1	56	2812.62	2850.46	2920.55	2883.92	2804.9	2888	2946.25	2936.31	2912.41
sp|O75843|AP1G2_HUMAN	AP1G2	AP-1 complex subunit gamma-like 2	15	602.438	622.977	619.945	576.558	576.143	567.074	601.047	607.387	627.535
sp|P54920|SNAA_HUMAN	NAPA	Alpha-soluble NSF attachment protein	27	3485.86	3493.81	3485.19	3548.07	3504.74	3518.44	3550.47	3517.51	3499.47
sp|Q9H115|SNAB_HUMAN	NAPB	Beta-soluble NSF attachment protein	14	2910.24	2890.37	2782.6	2865.17	2794.8	2816.07	2868.09	2815.21	2794.79
sp|Q3MIX3|ADCK5_HUMAN	ADCK5	Uncharacterized aarF domain-containing protein kinase 5	5	178.983	181.475	179.274	193.955	189.423	183.818	191.951	194.446	201.918
sp|Q68EM7|RHG17_HUMAN	ARHGAP17	Rho GTPase-activating protein 17	42	4564.83	4359.3	4558.22	4530.12	4411.51	4300.35	4301.01	4314.19	4372.11
sp|P09417|DHPR_HUMAN	QDPR	Dihydropteridine reductase	34	3998.56	3840.71	3901.68	3787.27	3847.44	3777.91	3853.76	3882.78	3878.71
sp|Q9UKP4|ATS7_HUMAN	ADAMTS7	A disintegrin and metalloproteinase with thrombospondin motifs 7	1	39.4822	52.5065	43.2976	51.008	45.3044	45.1546	38.2953	46.5198	39.7318
sp|Q8NFW8|NEUA_HUMAN	CMAS	N-acylneuraminate cytidylyltransferase	42	4995.1	5025.54	4954.42	4807.43	4739.2	4813.46	5154.62	5107.99	5130.78
sp|Q86UK7|ZN598_HUMAN	ZNF598	E3 ubiquitin-protein ligase ZNF598	45	6945.51	6863.1	6848.11	6849.94	6840.89	6798	6699.32	6768.59	6736.45
tr|H3BPG6|H3BPG6_HUMAN	ZNF598	E3 ubiquitin-protein ligase ZNF598	1	68.7028	70.1381	76.4264	74.4355	79.0332	76.7764	71.0343	65.5145	71.4808
sp|P11766|ADHX_HUMAN	ADH5	Alcohol dehydrogenase class-3	72	6991.14	7071.52	7311.31	7017.89	7025.85	7153.09	7093.67	7265.31	7172.59
sp|P46019|KPB2_HUMAN	PHKA2	Phosphorylase b kinase regulatory subunit alpha, liver isoform	23	1390.73	1424.44	1459.84	1302.28	1339.34	1372.49	1374.18	1421.11	1425.37
sp|P46020-2|KPB1_HUMAN	PHKA1	Isoform 2 of Phosphorylase b kinase regulatory subunit alpha, skeletal muscle isoform	19	1784.9	1783.22	1775.7	1720.47	1711.53	1693.42	1768.28	1780.88	1739.31
sp|P34896|GLYC_HUMAN	SHMT1	Serine hydroxymethyltransferase, cytosolic	33	2241.37	2199.17	2313.49	2211.06	2160.67	2194.33	2378.68	2360.29	2284.21
sp|P34897|GLYM_HUMAN	SHMT2	Serine hydroxymethyltransferase, mitochondrial	81	7895.9	7925.74	8023.39	7424.18	7504.85	7485.65	7760.69	7643.52	7588.38
tr|J3KRZ5|J3KRZ5_HUMAN	SHMT1	Serine hydroxymethyltransferase, cytosolic (Fragment)	2	33.8431	28.7697	33.7056	27.4593	23.6384	25.4417	26.0375	27.8401	26.4455
sp|Q12788|TBL3_HUMAN	TBL3	Transducin beta-like protein 3	53	6342.24	6272.5	6311.18	6404.83	6412.21	6418.6	6408.73	6353.74	6411.42
sp|O95319-3|CELF2_HUMAN	CELF2	Isoform 3 of CUGBP Elav-like family member 2	3	55.237	49.7663	50.6494	48.8191	50.4808	50.6048	40.269	55.1266	57.9462
sp|Q92879-4|CELF1_HUMAN	CELF1	Isoform 4 of CUGBP Elav-like family member 1	22	3586.22	3458.01	3561.15	3731.52	3760.98	3649.93	3641.05	3484.85	3467.35
sp|P52815|RM12_HUMAN	MRPL12	39S ribosomal protein L12, mitochondrial	20	4634.42	4432.99	4378.22	3956.4	4106.48	4105.56	4053.33	3909.94	3891.77
sp|Q9UBX3-2|DIC_HUMAN	SLC25A10	Isoform 2 of Mitochondrial dicarboxylate carrier	22	2088.32	2140.7	2159.66	2091.86	2102.26	2088.34	2133.03	2250.56	2156.28
sp|Q8NB16|MLKL_HUMAN	MLKL	Mixed lineage kinase domain-like protein	9	236.467	259.731	275.986	268.957	280.919	265.565	285.303	285.858	290.434
sp|P12081|SYHC_HUMAN	HARS	Histidine--tRNA ligase, cytoplasmic	45	11395.8	11348.5	11185.4	11275.1	11223.9	11280.5	11290.7	11428.7	11464.7
sp|P49590|SYHM_HUMAN	HARS2	Probable histidine--tRNA ligase, mitochondrial	12	2765.42	2699.3	2717.89	2535.35	2541.07	2533.79	2569.63	2627.15	2658.64
sp|Q9H0D6|XRN2_HUMAN	XRN2	5'-3' exoribonuclease 2	70	10610.1	10595.4	10584.5	10156.2	10102.3	10172	10424.3	10480.7	10392.6
sp|P78549|NTH_HUMAN	NTHL1	Endonuclease III-like protein 1	10	240.865	242.6	258.564	271.047	267.917	272.303	274.611	277.475	284.04
sp|Q9NRV9|HEBP1_HUMAN	HEBP1	Heme-binding protein 1	17	1126.55	1162.77	1255.45	1212.83	1232.6	1212.14	1126.29	1165.31	1181.55
sp|Q9BV73|CP250_HUMAN	CEP250	Centrosome-associated protein CEP250	37	2423.64	2405.51	2291.94	2411.06	2370.54	2367.61	2349.38	2353.57	2354.31
sp|P09601|HMOX1_HUMAN	HMOX1	Heme oxygenase 1	14	160.615	157.864	207.196	282.297	265.919	256.223	225.118	226.08	220.55
sp|Q92797|SYMPK_HUMAN	SYMPK	Symplekin	89	10392.9	10491.9	10594.7	10019.2	10066.7	9985.26	10128.6	10168.4	10298.6
sp|O75643|U520_HUMAN	SNRNP200	U5 small nuclear ribonucleoprotein 200 kDa helicase	185	31917.3	31450.9	31656.3	32045.8	32196.3	32033.3	32431.6	32161.2	32201.1
sp|Q9ULM3|YETS2_HUMAN	YEATS2	YEATS domain-containing protein 2	23	2048.26	2082.83	2069.09	2000.79	1977.54	2035.56	1952.21	1981.93	1955.4
sp|Q14999-2|CUL7_HUMAN	CUL7	Isoform 2 of Cullin-7	23	1147.53	1140.19	1150.99	1134.29	1110.31	1166.1	1123.93	1132.39	1104.12
sp|Q8IWT3|CUL9_HUMAN	CUL9	Cullin-9	15	1462.31	1462	1442.61	1330.86	1339.06	1345.7	1437.01	1452.75	1412.53
sp|P42345|MTOR_HUMAN	MTOR	Serine/threonine-protein kinase mTOR	106	8542.45	8612.76	8551.07	7947.05	7953.97	8076.86	8387.28	8346.13	8330.71
sp|Q9BRX8|PXL2A_HUMAN	PRXL2A	Peroxiredoxin-like 2A	21	1166.4	1133.1	1195.63	1315.86	1312.74	1275.77	1247.79	1281.03	1211.11
sp|P11172|UMPS_HUMAN	UMPS	Uridine 5'-monophosphate synthase	65	5522.83	5626.16	5559.14	5654.38	5451.19	5691.51	5751.41	5776.34	5737.05
sp|P41227|NAA10_HUMAN	NAA10	N-alpha-acetyltransferase 10	23	3943.93	3914.25	3842.74	3904.96	3931.5	3887.17	3898.6	3857.97	3939.01
sp|Q9NQX4|MYO5C_HUMAN	MYO5C	Unconventional myosin-Vc	31	583.096	659.988	697.027	669.648	650.62	622.123	657.127	642.256	640.376
sp|Q9ULV0|MYO5B_HUMAN	MYO5B	Unconventional myosin-Vb	32	446.614	450.551	569.696	549.062	527.605	566.645	543.341	527.279	531.18
sp|Q9ULV0-2|MYO5B_HUMAN	MYO5B	Isoform 2 of Unconventional myosin-Vb	1	4.64045	10.4693	7.2417	5.74634	5.32601	6.8665	7.01137	4.56998	4.83491
sp|Q9Y4I1-3|MYO5A_HUMAN	MYO5A	Isoform 3 of Unconventional myosin-Va	29	4718.28	4642.19	4635.38	4464.52	4412.88	4462.6	4526.58	4593.72	4589.77
sp|Q9Y5V0|ZN706_HUMAN	ZNF706	Zinc finger protein 706	3	287.005	280.247	287.653	296.452	302.322	306.911	254.421	245.063	257.956
sp|Q16222|UAP1_HUMAN	UAP1	UDP-N-acetylhexosamine pyrophosphorylase	45	2782.38	2732.68	2834.05	3042.05	3048.8	3044.52	2934.1	2946.01	2910.34
sp|Q3KQV9|UAP1L_HUMAN	UAP1L1	UDP-N-acetylhexosamine pyrophosphorylase-like protein 1	33	2618.66	2665.76	2583.87	2720.07	2700.94	2773.16	2680.2	2671.92	2617.01
sp|Q96MW1|CCD43_HUMAN	CCDC43	Coiled-coil domain-containing protein 43	16	1828.03	1799.84	1891.33	1736.4	1783.07	1733.67	1573.58	1649.55	1611.06
sp|P47736-4|RPGP1_HUMAN	RAP1GAP	Isoform 4 of Rap1 GTPase-activating protein 1	7	1510.3	1486.59	1463.88	1565.29	1505.49	1579.9	1461.4	1427.83	1482.76
sp|Q684P5|RPGP2_HUMAN	RAP1GAP2	Rap1 GTPase-activating protein 2	37	5202.57	5255.54	5182.21	5114.66	5106.01	5122.76	5142.53	5143.83	5143.7
sp|O00401|WASL_HUMAN	WASL	Neural Wiskott-Aldrich syndrome protein	27	3333.43	3267.69	3142.94	3403.51	3364.68	3347.45	3210.63	3204.36	3224.99
sp|Q9C0C9|UBE2O_HUMAN	UBE2O	(E3-independent) E2 ubiquitin-conjugating enzyme	90	15530.2	15552.5	15658.5	15915.3	15792	15714.3	15924.1	15997.7	16052.8
sp|Q13813-3|SPTN1_HUMAN	SPTAN1	Isoform 3 of Spectrin alpha chain, non-erythrocytic 1	199	43146.6	42744	42741.1	42381.4	42354.2	42331.2	43387.2	43026.6	43230.6
tr|A0A0D9SGF6|A0A0D9SGF6_HUMAN	SPTAN1	Spectrin alpha chain, non-erythrocytic 1	8	1345.48	1295.69	1295.84	1344.12	1305.65	1271.84	1372.99	1293.1	1298.12
sp|P78346-2|RPP30_HUMAN	RPP30	Isoform 2 of Ribonuclease P protein subunit p30	11	878.851	846.666	902.06	834.97	847.703	854.95	894.743	931.42	896.966
sp|Q9Y613|FHOD1_HUMAN	FHOD1	FH1/FH2 domain-containing protein 1	66	8521.17	8579.95	8612.44	8688.5	8666.95	8605.79	8555.1	8664.54	8644.88
sp|P07814|SYEP_HUMAN	EPRS	Bifunctional glutamate/proline--tRNA ligase	186	27530.6	27400.1	27398.9	27098.2	26834.2	26960.2	27577.3	27350.4	27421.1
sp|P47897|SYQ_HUMAN	QARS	Glutamine--tRNA ligase	47	6706.9	6722.46	6731.99	6829.55	6791.86	6868.09	6838.63	6790.69	6746.59
tr|B4DDN1|B4DDN1_HUMAN	QARS1	Glutaminyl-tRNA synthetase 1	1	9.00249	9.82471	7.52404	9.87602	7.31499	7.10627	8.12258	6.00051	9.18888
sp|Q86W92|LIPB1_HUMAN	PPFIBP1	Liprin-beta-1	44	6251.93	6167.22	6067.17	6109.97	6158.24	6175.32	6125.98	6030.85	6058.04
sp|Q8ND30|LIPB2_HUMAN	PPFIBP2	Liprin-beta-2	35	3844.64	3777.93	3784.99	3841.46	3875.08	3878.85	3802.37	3670.25	3681.84
sp|Q9Y5B9|SP16H_HUMAN	SUPT16H	FACT complex subunit SPT16	87	13835.9	13701	13673.4	14016.3	13951.8	13848.2	14074.7	13968.4	13820.2
sp|P15289|ARSA_HUMAN	ARSA	Arylsulfatase A	13	1042.56	1070.71	1046.99	982.302	944.335	992.36	1040.34	1007.92	1010.51
sp|P34059|GALNS_HUMAN	GALNS	N-acetylgalactosamine-6-sulfatase	27	1700.11	1722.48	1735.47	1928.5	1694.99	1708.98	1684.08	1711.36	1714.52
sp|Q99959-2|PKP2_HUMAN	PKP2	Isoform 1 of Plakophilin-2	40	854.596	883.489	1031.72	1020.8	1044.17	1011.79	1036.3	1002.46	1009.95
sp|Q969F9|HPS3_HUMAN	HPS3	Hermansky-Pudlak syndrome 3 protein	18	1377.52	1423.03	1405.47	1436.07	1413.26	1406.72	1361.35	1420.03	1421.24
sp|O00471|EXOC5_HUMAN	EXOC5	Exocyst complex component 5	51	7926.01	7925.02	7922.75	7713.96	7773.84	7722.07	7856.44	7865.72	7761.89
sp|Q14980|NUMA1_HUMAN	NUMA1	Nuclear mitotic apparatus protein 1	185	47332	46739.8	46414	44437.1	44458.8	44714.9	46498.7	46198.7	46831.2
sp|Q14980-2|NUMA1_HUMAN	NUMA1	Isoform 2 of Nuclear mitotic apparatus protein 1	4	1291.35	1208.83	1155.05	1139.37	1167.57	1117.2	1206.06	1193.02	1159.68
sp|Q9P287|BCCIP_HUMAN	BCCIP	BRCA2 and CDKN1A-interacting protein	13	741.934	748.299	767.397	749.177	810.147	776.927	783.439	747.127	744.288
sp|Q9P287-2|BCCIP_HUMAN	BCCIP	Isoform 2 of BRCA2 and CDKN1A-interacting protein	21	1964.81	2004.2	1972.19	1922.4	1966.42	1903.67	2008.96	2058.02	1985.9
sp|Q3ZAQ7|VMA21_HUMAN	VMA21	Vacuolar ATPase assembly integral membrane protein VMA21	2	70.505	80.0351	90.6376	82.1536	84.5032	77.8922	87.1846	79.9243	74.0151
sp|Q3ZAQ7-2|VMA21_HUMAN	VMA21	Isoform 2 of Vacuolar ATPase assembly integral membrane protein VMA21	4	142.437	166.176	156.148	163.894	156.728	138.644	173.096	163.258	170.254
sp|Q13362-2|2A5G_HUMAN	PPP2R5C	Isoform Gamma-1 of Serine/threonine-protein phosphatase 2A 56 kDa regulatory subunit gamma isoform	1	158.861	182.433	170.865	197.92	144.664	168.902	183.518	171.576	179.673
sp|Q13362-5|2A5G_HUMAN	PPP2R5C	Isoform 5 of Serine/threonine-protein phosphatase 2A 56 kDa regulatory subunit gamma isoform	4	606.501	620.989	572.49	598.058	631.601	614.666	592.297	620.922	608.692
sp|Q14738|2A5D_HUMAN	PPP2R5D	Serine/threonine-protein phosphatase 2A 56 kDa regulatory subunit delta isoform	27	4574.66	4459.69	4539.57	4518.23	4489.11	4552.4	4651.28	4493.19	4499.33
sp|Q15173|2A5B_HUMAN	PPP2R5B	Serine/threonine-protein phosphatase 2A 56 kDa regulatory subunit beta isoform	7	824.794	813.728	797.939	733.963	750.568	734.527	791.249	754.27	745.96
sp|Q16537|2A5E_HUMAN	PPP2R5E	Serine/threonine-protein phosphatase 2A 56 kDa regulatory subunit epsilon isoform	26	5064.54	4876.54	4890.4	4635.84	4821.36	4743.13	5097.34	4898.42	4982.87
sp|P14866|HNRPL_HUMAN	HNRNPL	Heterogeneous nuclear ribonucleoprotein L	73	12050.1	12068.9	11914	11993.6	12035	12157.2	11988.6	11926.2	11945.7
sp|Q13011|ECH1_HUMAN	ECH1	Delta(3,5)-Delta(2,4)-dienoyl-CoA isomerase, mitochondrial	39	4645.41	4724.12	4818.08	4526.32	4547.41	4606.52	4622.96	4639.05	4622.51
sp|Q8WVV9|HNRLL_HUMAN	HNRNPLL	Heterogeneous nuclear ribonucleoprotein L-like	25	5745.84	5860.2	5754.07	5687.57	5737.31	5885.11	5569.47	5654.08	5667.46
tr|A0A3B3ITJ4|A0A3B3ITJ4_HUMAN	HNRNPL	Heterogeneous nuclear ribonucleoprotein L (Fragment)	3	914.242	914.24	874.898	833.302	885.429	848.926	870.716	833.754	868.146
sp|Q13217|DNJC3_HUMAN	DNAJC3	DnaJ homolog subfamily C member 3	66	2849.61	2817.56	2993.25	2827.79	2839.27	2870.87	3185.23	3192.11	3134.64
sp|Q99988|GDF15_HUMAN	GDF15	Growth/differentiation factor 15	6	33.6015	28.4345	47.6034	49.8542	62.1781	46.5317	48.0037	50.3126	49.6049
sp|Q92481-2|AP2B_HUMAN	TFAP2B	Isoform 2 of Transcription factor AP-2-beta	18	3679.78	3655.03	3649.38	3333.54	3433.79	3415.87	3428.32	3457.07	3449.05
sp|Q9H3S7|PTN23_HUMAN	PTPN23	Tyrosine-protein phosphatase non-receptor type 23	70	9122.04	9186.35	9078.61	9224.58	9195.08	9188.23	9163.32	9138.45	9255.43
sp|O00139-4|KIF2A_HUMAN	KIF2A	Isoform 4 of Kinesin-like protein KIF2A	59	10007.6	10019.9	9981.24	9437.95	9357.18	9473.02	9639.19	9680.37	9660.78
sp|Q99661|KIF2C_HUMAN	KIF2C	Kinesin-like protein KIF2C	43	5843.98	5787.62	5816.15	5652.43	5628.02	5617.77	5452.25	5389.7	5408.31
sp|O95202|LETM1_HUMAN	LETM1	Mitochondrial proton/calcium exchanger protein	62	8951.04	8770.41	8830.17	8613.75	8540.27	8511.63	8549.22	8610.39	8554.55
sp|O95613|PCNT_HUMAN	PCNT	Pericentrin	42	2931.9	2943.97	2910.82	2745.58	2766.04	2701.32	2770.03	2805.68	2760.67
sp|Q2VYF4|LETM2_HUMAN	LETM2	LETM1 domain-containing protein LETM2, mitochondrial	1	37.1645	41.7651	30.404	33.2372	32.8819	31.2472	35.0372	32.1716	35.0208
sp|P62851|RS25_HUMAN	RPS25	40S ribosomal protein S25	25	2230.58	2212.88	2148.06	2389.88	2353.11	2376.79	2288.52	2284.23	2257.11
sp|Q86TP1|PRUN1_HUMAN	PRUNE1	Exopolyphosphatase PRUNE1	14	1530.76	1533.59	1562.09	1474.69	1444.62	1428.44	1520.21	1473.75	1523.39
sp|P21549|SPYA_HUMAN	AGXT	Serine--pyruvate aminotransferase	17	49.836	41.0504	139.83	129.741	138.36	106.108	122.239	129.403	131.322
sp|O60287|NPA1P_HUMAN	URB1	Nucleolar pre-ribosomal-associated protein 1	52	3444.46	3482.87	3497.54	3438.26	3401.14	3407.66	3407.48	3432.21	3455.55
sp|O96013|PAK4_HUMAN	PAK4	Serine/threonine-protein kinase PAK 4	26	2721.86	2677.29	2658.39	2630.88	2611.46	2540.19	2545.41	2588.19	2551.78
sp|Q9P286|PAK5_HUMAN	PAK5	Serine/threonine-protein kinase PAK 5	3	195.314	203.5	189.111	182.953	192.727	200.824	203.246	185.27	194.141
sp|Q32P41|TRM5_HUMAN	TRMT5	tRNA (guanine(37)-N1)-methyltransferase	36	4773.13	4813.69	4747.22	4463.83	4589.17	4569.86	4610.93	4644.12	4695.17
sp|Q9H2Y7|ZN106_HUMAN	ZNF106	Zinc finger protein 106	12	911.72	928.518	895.701	995.798	969.113	993.73	834.159	854.677	875
sp|Q9UNQ2|DIM1_HUMAN	DIMT1	Probable dimethyladenosine transferase	37	4367.79	4328.47	4401.65	4740.12	4707.2	4692.78	4704.94	4653.12	4661.65
sp|P42765|THIM_HUMAN	ACAA2	3-ketoacyl-CoA thiolase, mitochondrial	57	9228.43	9122.54	9326.01	8812.8	8775.77	8744.04	8704.87	8720.28	8687.93
tr|K7ER88|K7ER88_HUMAN	ACAA2	3-ketoacyl-CoA thiolase, mitochondrial (Fragment)	5	371.748	351.676	361.443	284.162	336.756	307.433	338.134	323.769	329.475
sp|P78527|PRKDC_HUMAN	PRKDC	DNA-dependent protein kinase catalytic subunit	183	29891.3	30147.4	30131.9	29426.4	29485.7	29409.8	31268.7	31270.9	31081
sp|O95831|AIFM1_HUMAN	AIFM1	Apoptosis-inducing factor 1, mitochondrial	76	7776.25	7875.37	8003.92	7746.38	7709.52	7789.55	7760.34	7588.65	7567.28
sp|Q07954|LRP1_HUMAN	LRP1	Prolow-density lipoprotein receptor-related protein 1	106	10542.6	10632.4	10460.2	11394.5	11394.8	11353.2	9656.13	9691.17	9927.79
sp|Q9NZR2|LRP1B_HUMAN	LRP1B	Low-density lipoprotein receptor-related protein 1B	1	97.2569	107.536	106.452	99.0485	98.2335	110.005	82.042	92.2731	86.6328
sp|Q9H2T7|RBP17_HUMAN	RANBP17	Ran-binding protein 17	3	179.025	179.93	180.592	162.901	147.805	151.852	195.884	169.522	200.135
sp|Q9UIA9|XPO7_HUMAN	XPO7	Exportin-7	92	12220.3	12155.7	12145.3	11688.8	11819.7	11781.2	12115.5	12030.7	12073.1
sp|Q14978-2|NOLC1_HUMAN	NOLC1	Isoform Beta of Nucleolar and coiled-body phosphoprotein 1	52	13389.3	13177.9	13231.5	13815.8	13791.4	13810.9	13294.4	13452.9	13615.5
sp|Q6Y7W6|GGYF2_HUMAN	GIGYF2	GRB10-interacting GYF protein 2	34	4620.91	4549.67	4495.08	4552.74	4557.58	4617.57	4248.93	4236.74	4294.58
sp|Q8NB78|KDM1B_HUMAN	KDM1B	Lysine-specific histone demethylase 1B	21	2510.41	2463.7	2572.71	2494.06	2463.53	2466.33	2467.02	2469.84	2498.83
sp|Q8N4F0|BPIB2_HUMAN	BPIFB2	BPI fold-containing family B member 2	9	72.6427	79.1851	117.523	101.783	96.7108	107.539	110.127	105.084	111.519
sp|P04114|APOB_HUMAN	APOB	Apolipoprotein B-100	211	1974.43	2018.84	3034.93	2961.28	2911.9	2869.16	2707.49	2752.76	2745.45
sp|Q5VTQ0|TT39B_HUMAN	TTC39B	Tetratricopeptide repeat protein 39B	11	98.9232	97.7528	120.276	115.124	98.7333	106.473	126.778	110.53	110.326
sp|P55084|ECHB_HUMAN	HADHB	Trifunctional enzyme subunit beta, mitochondrial	85	11231	11206	11314	11066.1	10891.5	10875.7	11067.6	10997.7	10979.1
sp|Q9BUE6-2|ISCA1_HUMAN	ISCA1	Isoform 2 of Iron-sulfur cluster assembly 1 homolog, mitochondrial	16	2073.75	2031.9	2022.98	1960.3	1980.56	1965.5	1893.81	1863.27	1904.91
sp|O15020|SPTN2_HUMAN	SPTBN2	Spectrin beta chain, non-erythrocytic 2	80	13205.1	13290.7	13138.7	12173.2	12139.6	12151.5	12613.9	12599.2	12564.7
sp|O43707|ACTN4_HUMAN	ACTN4	Alpha-actinin-4	190	16839.2	17008.5	17119.9	17434.9	17385.5	17363.8	17191.1	17220.9	17057.8
sp|P12814|ACTN1_HUMAN	ACTN1	Alpha-actinin-1	139	12369.4	12394.9	12626.6	12921.5	12984.4	13080.3	12572.2	12508.3	12522.6
sp|Q01082|SPTB2_HUMAN	SPTBN1	Spectrin beta chain, non-erythrocytic 1	243	39346.3	39397.8	39205.3	39219.2	39286	39357.6	40095.4	39716.7	39770.5
sp|Q01082-3|SPTB2_HUMAN	SPTBN1	Isoform 2 of Spectrin beta chain, non-erythrocytic 1	1	13.9873	17.4568	17.231	19.7699	19.3225	18.7672	14.0047	18.6037	16.221
tr|K7EJH8|K7EJH8_HUMAN	ACTN4	Alpha-actinin-4 (Fragment)	5	345.443	352.855	322.098	328.567	331.916	325.903	349.067	318.356	335.564
sp|O00231|PSD11_HUMAN	PSMD11	26S proteasome non-ATPase regulatory subunit 11	83	13755.6	13681	13627.4	14893.7	14969.8	14863	14896.5	14581.9	14590.7
sp|P04350|TBB4A_HUMAN	TUBB4A	Tubulin beta-4A chain	4	1228.72	1144.35	1151.38	1128.58	1227.63	1167.92	1206.02	1155.55	1165.5
sp|P07437|TBB5_HUMAN	TUBB	Tubulin beta chain	74	7544.65	7456.59	7305.55	6848.97	6964.46	6968.27	7202.63	7231.83	7209.4
sp|P68371|TBB4B_HUMAN	TUBB4B	Tubulin beta-4B chain	21	1888.57	1853.93	1909.91	1824.27	1837.99	1845.09	1861.17	1793.62	1796.82
sp|Q13509|TBB3_HUMAN	TUBB3	Tubulin beta-3 chain	116	15863.3	16143.5	15735.2	15680.9	15906.2	15826.9	15609.8	15515.9	15644.7
sp|Q13885|TBB2A_HUMAN	TUBB2A	Tubulin beta-2A chain	67	11805.8	12040.7	11673.8	11693.6	11538.5	11530.4	11620.7	11763.5	11523.6
sp|Q9BUF5|TBB6_HUMAN	TUBB6	Tubulin beta-6 chain	32	3636.19	3572.97	3565.76	3664.01	3702.78	3662.52	3462.48	3469.32	3445.01
sp|Q9BVA1|TBB2B_HUMAN	TUBB2B	Tubulin beta-2B chain	8	1213.08	1175.51	1171.75	1095.63	1130.39	1133.23	1110.44	1157.71	1133.64
tr|G3V3J6|G3V3J6_HUMAN	TUBB3	HCG1983504, isoform CRA_b	1	127.232	130.107	128.261	101.831	116.709	101.112	108.141	103.946	111.283
tr|K7ES63|K7ES63_HUMAN	TUBB6	Tubulin beta chain (Fragment)	2	101.691	108.478	100.751	88.7501	90.4272	88.0318	86.9402	90.0052	89.3354
tr|M0QYM7|M0QYM7_HUMAN	TUBB4A	Tubulin beta-4A chain (Fragment)	1	199.857	223.686	211.837	186.992	183.36	181.768	185.982	199.968	200.759
sp|Q96C11-3|FGGY_HUMAN	FGGY	Isoform 4 of FGGY carbohydrate kinase domain-containing protein	1	28.7658	23.6899	26.8728	25.9642	33.2283	21.8829	29.6677	28.1569	27.8353
sp|Q9BPU6|DPYL5_HUMAN	DPYSL5	Dihydropyrimidinase-related protein 5	72	21178.1	20912.8	20523.9	20055.9	20232.6	20043.5	20705.6	20611.5	20633.4
sp|Q6N022|TEN4_HUMAN	TENM4	Teneurin-4	13	1500.16	1576.66	1529.81	1448.74	1459.68	1556.53	1412.1	1447.5	1468.26
sp|O96028|NSD2_HUMAN	NSD2	Histone-lysine N-methyltransferase NSD2	69	11408.2	11340.1	11057.9	11542.5	11526.1	11453.7	10997.6	11086.7	11278.6
sp|Q96L73|NSD1_HUMAN	NSD1	Histone-lysine N-methyltransferase, H3 lysine-36 and H4 lysine-20 specific	9	703.004	703.425	690.381	668.763	675.32	689.92	695.643	672.703	669.654
sp|Q9BZ95|NSD3_HUMAN	NSD3	Histone-lysine N-methyltransferase NSD3	24	4105.79	4136.8	4113.29	4009.07	4031.18	4102.19	3964.5	3998.34	4008.91
sp|O76024|WFS1_HUMAN	WFS1	Wolframin	47	1887.34	1932.76	2091.6	2075.11	2036.38	2132.57	2190.61	2251.2	2181.56
sp|Q8TAA9|VANG1_HUMAN	VANGL1	Vang-like protein 1	3	107.433	96.4032	90.555	113.442	127.35	111.388	101.745	101.207	114.421
sp|P54886|P5CS_HUMAN	ALDH18A1	Delta-1-pyrroline-5-carboxylate synthase	95	5023.78	5127.03	5482.92	5450.3	5317.02	5428.17	5447.25	5389.8	5318.89
sp|O43303|CP110_HUMAN	CCP110	Centriolar coiled-coil protein of 110 kDa	17	1862.86	1819.6	1815.93	1903.45	1976.37	1956.58	1835.17	1829.3	1841.27
sp|Q9HA92|RSAD1_HUMAN	RSAD1	Radical S-adenosyl methionine domain-containing protein 1, mitochondrial	8	452.471	472.284	469.873	434.987	420.22	393.837	416.393	448.345	419.513
sp|Q14534|ERG1_HUMAN	SQLE	Squalene monooxygenase	60	1594.78	1590.96	1733.08	2543.13	2558.24	2546.56	2591.52	2642.86	2629.13
sp|Q02083|NAAA_HUMAN	NAAA	N-acylethanolamine-hydrolyzing acid amidase	4	51.3845	41.7524	47.3715	49.6342	39.8449	43.9559	46.9166	46.0934	51.3653
sp|Q86UY6|NAA40_HUMAN	NAA40	N-alpha-acetyltransferase 40	12	1040.67	1062.02	1063.51	1121.43	1091.27	1117.91	1064.33	1080.75	1078.63
sp|P48728|GCST_HUMAN	AMT	Aminomethyltransferase, mitochondrial	7	623.471	646.197	640.196	564.244	555.585	579.647	593.882	585.11	575.058
sp|Q16891-2|MIC60_HUMAN	IMMT	Isoform 2 of MICOS complex subunit MIC60	9	298.227	286.369	279.809	284.495	272.66	273.319	293.408	288.408	293.212
sp|Q16891-4|MIC60_HUMAN	IMMT	Isoform 4 of MICOS complex subunit MIC60	98	20366	20115.3	19895.9	19725.7	19617.9	19859.2	19648.7	19606.3	19706.2
sp|P35222|CTNB1_HUMAN	CTNNB1	Catenin beta-1	24	1985.54	2003.5	2121.42	2206.59	2149.55	2187.04	2130.4	2082.97	2130.74
sp|A1L0T0|ILVBL_HUMAN	ILVBL	Acetolactate synthase-like protein	35	1611.62	1652.46	1704.53	1904.88	1811.5	1816.73	1804.55	1798.21	1825.91
sp|Q8IZ69|TRM2A_HUMAN	TRMT2A	tRNA (uracil-5-)-methyltransferase homolog A	22	2990.91	2993.62	2907.17	2859.78	2824.76	2908.6	2842.57	2839.52	2875.01
sp|Q96DX7|TRI44_HUMAN	TRIM44	Tripartite motif-containing protein 44	5	185.657	224.678	209.812	219.618	210.788	232.674	201.678	206.156	204.268
sp|P63010-2|AP2B1_HUMAN	AP2B1	Isoform 2 of AP-2 complex subunit beta	59	11259.5	11276	11163.6	10776.2	10863.1	10910.2	11093.1	10955	10796.6
sp|Q10567|AP1B1_HUMAN	AP1B1	AP-1 complex subunit beta-1	59	5710.69	5759.78	5687.06	5842.14	5740.2	5648.1	5800.41	5793.95	5735.38
sp|Q10567-3|AP1B1_HUMAN	AP1B1	Isoform C of AP-1 complex subunit beta-1	1	534.67	591.133	601.656	619.784	575.059	610.73	598.895	588.252	554.819
sp|Q14191|WRN_HUMAN	WRN	Werner syndrome ATP-dependent helicase	28	2692.1	2759.86	2648.73	2649.29	2599.33	2622.52	2651.86	2640.91	2682.53
sp|O14920|IKKB_HUMAN	IKBKB	Inhibitor of nuclear factor kappa-B kinase subunit beta	13	531.547	543.724	518.005	509.462	515.159	527.493	516.223	508.095	507.368
sp|O15111|IKKA_HUMAN	CHUK	Inhibitor of nuclear factor kappa-B kinase subunit alpha	36	3598.3	3616.83	3633.47	3639.3	3647.11	3558.51	3763.91	3707.57	3770.3
sp|Q13315|ATM_HUMAN	ATM	Serine-protein kinase ATM	82	5634.85	5660.22	5624.34	5129.64	5076.34	5086.7	5556.16	5679.92	5667.52
sp|Q9UBT6|POLK_HUMAN	POLK	DNA polymerase kappa	10	560.129	612.879	591.225	574.296	579.986	582.733	569.623	583.454	571.537
sp|O15264|MK13_HUMAN	MAPK13	Mitogen-activated protein kinase 13	8	163.786	140.029	191.465	174.373	171.529	177.701	189.318	159.994	173.282
sp|P45983-2|MK08_HUMAN	MAPK8	Isoform 1 of Mitogen-activated protein kinase 8	1	121.253	123.814	110.225	120.319	129.713	126.99	127.26	110.09	122.39
sp|P45983-4|MK08_HUMAN	MAPK8	Isoform 4 of Mitogen-activated protein kinase 8	7	964.174	1025.2	1024.6	1022.08	976.491	982.875	952.005	1014.06	1017.41
sp|P45984|MK09_HUMAN	MAPK9	Mitogen-activated protein kinase 9	11	1079.43	1051.75	1059.18	1023.32	1009.44	964.166	1029.27	1029.67	1016.03
sp|P53779|MK10_HUMAN	MAPK10	Mitogen-activated protein kinase 10	4	1053.23	982.982	989.87	996.842	1014.15	998.134	1084.23	998.909	998.485
sp|Q15746-2|MYLK_HUMAN	MYLK	Isoform 2 of Myosin light chain kinase, smooth muscle	2	23.2124	21.9744	21.5382	18.144	17.023	21.7988	20.4845	21.2638	19.6288
sp|Q15746-6|MYLK_HUMAN	MYLK	Isoform Del-1790 of Myosin light chain kinase, smooth muscle	37	1481.31	1510.42	1607.61	1535.57	1492.43	1457.2	1513.81	1497.76	1521.39
sp|Q15759|MK11_HUMAN	MAPK11	Mitogen-activated protein kinase 11	2	77.069	67.1926	66.2511	51.5934	50.6555	55.9273	66.5148	55.1086	53.0248
sp|Q16539|MK14_HUMAN	MAPK14	Mitogen-activated protein kinase 14	3	492.186	491.889	499.3	475.103	463.334	471.538	547.614	491.577	533.873
sp|Q16539-2|MK14_HUMAN	MAPK14	Isoform CSBP1 of Mitogen-activated protein kinase 14	21	1742.6	1757.06	1776.25	1714.42	1700.39	1691.56	1715.08	1774.94	1712.54
sp|Q9NZC9|SMAL1_HUMAN	SMARCAL1	SWI/SNF-related matrix-associated actin-dependent regulator of chromatin subfamily A-like protein 1	16	713.474	700.642	746.053	713.016	716.838	693.828	746.064	735.405	719.361
sp|Q96EY9|ADAT3_HUMAN	ADAT3	Probable inactive tRNA-specific adenosine deaminase-like protein 3	9	874.419	862.045	847.46	876.939	847.886	853.253	862.174	872.735	873.57
sp|Q9Y2V7|COG6_HUMAN	COG6	Conserved oligomeric Golgi complex subunit 6	37	2776.58	2912.18	2913.15	2961.82	2980.01	3007.49	2864.09	2914.08	2860.58
sp|Q6KC79|NIPBL_HUMAN	NIPBL	Nipped-B-like protein	65	6148.38	6246.93	6205.24	5994.2	6017.16	5979.19	6053.84	6005.34	6002.24
sp|Q12800|TFCP2_HUMAN	TFCP2	Alpha-globin transcription factor CP2	21	4009.98	4068.06	3920.12	3965.54	3982.42	3989.65	3932.28	4007.17	3951.34
sp|Q8NE71|ABCF1_HUMAN	ABCF1	ATP-binding cassette sub-family F member 1	77	9274.91	9339.28	9380.04	9795.51	9738.03	9869.92	9618.23	9627.22	9558.86
sp|Q9NZI7|UBIP1_HUMAN	UBP1	Upstream-binding protein 1	18	1731.57	1692.36	1742.72	1623.22	1636.07	1620.32	1686.73	1695.08	1645.18
tr|Q5STZ8|Q5STZ8_HUMAN	ABCF1	ATP-binding cassette sub-family F member 1 (Fragment)	6	260.056	271.942	269.151	274.073	293.024	273.612	267.922	271.064	265.301
sp|Q9Y6N7-2|ROBO1_HUMAN	ROBO1	Isoform 2 of Roundabout homolog 1	35	2014.22	2031.02	2026.5	1963.59	2027.24	1987.59	1771.18	1816.95	1805.1
sp|P25787|PSA2_HUMAN	PSMA2	Proteasome subunit alpha type-2	53	5502.7	5581.87	5639.54	5780.63	5651.14	5774.36	5564.71	5481.99	5467.71
sp|Q5T8P6|RBM26_HUMAN	RBM26	RNA-binding protein 26	47	6740.52	6636.49	6688.32	6222.9	6312.27	6238.93	6139.21	6024.31	6099.75
sp|Q9P2N5|RBM27_HUMAN	RBM27	RNA-binding protein 27	30	4468	4411.78	4424.11	4613.33	4517.11	4483.67	4466.01	4395.25	4427.74
sp|Q86YP4-3|P66A_HUMAN	GATAD2A	Isoform 3 of Transcriptional repressor p66-alpha	39	3970.43	3971.94	3838.8	3888.98	3902.66	3891.83	3799.22	3817.98	3831.73
sp|Q8WXI9|P66B_HUMAN	GATAD2B	Transcriptional repressor p66-beta	30	5351.92	5388.65	5272.44	5378.24	5298.7	5246.34	5250.36	5211.09	5270.73
sp|Q86Y07|VRK2_HUMAN	VRK2	Serine/threonine-protein kinase VRK2	9	88.906	88.2046	117.226	119.545	115.824	113.005	113.512	103.839	108.89
sp|Q07864|DPOE1_HUMAN	POLE	DNA polymerase epsilon catalytic subunit A	50	6093.91	6072.32	6088.31	5861.32	5816.12	5910.6	6104.9	6130.66	6210.75
sp|P08574|CY1_HUMAN	CYC1	Cytochrome c1, heme protein, mitochondrial	22	2000.59	1969.81	2005.37	1871.41	1833.56	1839.01	1868.98	1870.91	1887.33
sp|Q9BV44|THUM3_HUMAN	THUMPD3	THUMP domain-containing protein 3	32	5021.3	5037.77	4929.79	4851.22	4876.17	4829.93	4873.9	4939.33	4895.89
sp|Q8IY81|SPB1_HUMAN	FTSJ3	pre-rRNA 2'-O-ribose RNA methyltransferase FTSJ3	74	10391.5	10331.5	10205.5	10969.3	10842.6	10967.2	10583.4	10645.5	10558.2
sp|Q9Y4L1|HYOU1_HUMAN	HYOU1	Hypoxia up-regulated protein 1	71	9891.54	9601.67	9913.32	11007.5	11044.5	10881.4	10718	10651.3	10594.2
tr|A0A494C039|A0A494C039_HUMAN	HYOU1	Hypoxia up-regulated protein 1	6	254.648	239.734	244.821	290.768	273.999	292.734	270.053	293.528	281.975
sp|Q8WYP5-2|ELYS_HUMAN	AHCTF1	Isoform 2 of Protein ELYS	90	10837.1	10768.6	10735.6	11992.3	11917.3	11913	11839.8	11799.4	11826.6
sp|Q8NE22|SETD9_HUMAN	SETD9	SET domain-containing protein 9	3	332.912	328.629	338.306	317.993	352.004	339.034	332.257	340.732	356.773
sp|O00506|STK25_HUMAN	STK25	Serine/threonine-protein kinase 25	7	225.496	238.065	242.685	211.12	199.598	217.817	203.82	206.353	222.953
sp|Q9P289|STK26_HUMAN	STK26	Serine/threonine-protein kinase 26	14	2156.21	2178.31	2157.41	2111.2	2107.03	2109.3	2037.08	2081.22	2072.94
sp|Q9Y6E0|STK24_HUMAN	STK24	Serine/threonine-protein kinase 24	16	2984.22	2960.85	2981.48	2768.98	2952.79	2875.12	2866.37	2908.66	2881.83
sp|O00291|HIP1_HUMAN	HIP1	Huntingtin-interacting protein 1	47	8222.81	8291.06	8068.55	8089.78	8074.44	8150.16	8217.79	8312.02	8162.58
sp|O75146|HIP1R_HUMAN	HIP1R	Huntingtin-interacting protein 1-related protein	45	5955.4	5963.28	5903.23	5881.85	5874.8	5845.06	5804.55	5977.97	5925.48
sp|Q8ND04-2|SMG8_HUMAN	SMG8	Isoform 2 of Protein SMG8	46	4850.84	4872.22	4783.7	4177.25	4199.59	4258.09	4331.27	4320.41	4366.17
sp|Q8NCN4|RN169_HUMAN	RNF169	E3 ubiquitin-protein ligase RNF169	6	432.356	417.697	422.201	422.165	403.058	411.573	402.886	389.232	404.894
sp|Q9UBP6|TRMB_HUMAN	METTL1	tRNA (guanine-N(7)-)-methyltransferase	18	739.3	776.993	735.947	752.44	712.748	714.468	755.682	764.275	730.192
sp|Q86Y37|CACL1_HUMAN	CACUL1	CDK2-associated and cullin domain-containing protein 1	11	2126.39	2102.89	2131.99	2157.18	2127.11	2074.13	2063.5	2095.11	2138.43
sp|O15240|VGF_HUMAN	VGF	Neurosecretory protein VGF	95	30662.8	30384	29831.7	19777.7	20364.9	20630.1	26997.3	27264.2	27212.8
sp|Q8NF37|PCAT1_HUMAN	LPCAT1	Lysophosphatidylcholine acyltransferase 1	27	2191.78	2233.52	2222.8	2188.58	2146.51	2110.03	2338.51	2330.93	2316.79
sp|Q9UKV3|ACINU_HUMAN	ACIN1	Apoptotic chromatin condensation inducer in the nucleus	88	8281.43	8316.16	8349.93	8500.96	8461.72	8639.71	8370.79	8377.29	8288.5
sp|Q9UKV3-5|ACINU_HUMAN	ACIN1	Isoform 4 of Apoptotic chromatin condensation inducer in the nucleus	5	549.018	568.51	597.481	580.036	571.852	551.274	560.921	529.011	591.282
tr|A0A0B4J2A0|A0A0B4J2A0_HUMAN		FGGY_N domain-containing protein	25	1822.71	1834.9	1924.77	1760.77	1756.67	1777.76	1883.58	1923.13	1936.93
sp|Q96GQ7|DDX27_HUMAN	DDX27	Probable ATP-dependent RNA helicase DDX27	68	6800.38	6872.2	6849.01	7160	7032.16	7046.11	6696.67	6775.85	6765.73
sp|Q9H9F9|ARP5_HUMAN	ACTR5	Actin-related protein 5	19	1530.98	1550.77	1554.25	1566.12	1539.71	1539.45	1543.03	1532.52	1537.27
sp|Q96TA1|NIBA2_HUMAN	NIBAN2	Protein Niban 2	38	6366.23	6352.96	6375.55	6638.98	6656.51	6600.74	6709.9	6579.78	6650.38
sp|Q8IVP5|FUND1_HUMAN	FUNDC1	FUN14 domain-containing protein 1	2	216.979	220.628	203.214	154.7	155.79	158.019	166.573	159.422	151.993
sp|P51788|CLCN2_HUMAN	CLCN2	Chloride channel protein 2	2	30.7457	32.7817	20.9201	19.1384	29.6569	27.8111	30.4784	28.2219	30.9594
sp|Q92947|GCDH_HUMAN	GCDH	Glutaryl-CoA dehydrogenase, mitochondrial	29	3064.36	3100.88	3175.08	3078.76	2986.84	3081.78	2963.9	3069.97	2996.75
tr|H7BXI1|H7BXI1_HUMAN	ESYT2	Extended synaptotagmin-2	40	4378.24	4442.68	4461.82	4757.9	4696.76	4678.18	4592.34	4655.53	4719.48
sp|Q96BH1|RNF25_HUMAN	RNF25	E3 ubiquitin-protein ligase RNF25	18	2062.36	2100.14	2077.18	2021.08	2018.57	2030.33	1960.15	1958.56	1975.88
sp|Q15181|IPYR_HUMAN	PPA1	Inorganic pyrophosphatase	78	8359.67	8390.93	8241.2	8297.92	8236.52	8232.45	8113.24	8137.49	8064.98
sp|Q9H2U2-2|IPYR2_HUMAN	PPA2	Isoform 2 of Inorganic pyrophosphatase 2, mitochondrial	51	7709.88	7503.01	7614.86	7314.95	7262.09	7412	7214.07	7248.48	7329.56
tr|A0A0C4DGB9|A0A0C4DGB9_HUMAN	PPA2	Inorganic pyrophosphatase 2, mitochondrial	1	65.9897	66.6292	81.7635	72.3406	70.3694	73.3098	62.584	74.225	66.0695
sp|P23246|SFPQ_HUMAN	SFPQ	Splicing factor, proline- and glutamine-rich	105	22692.4	22684.8	22395.4	22452.5	22413.5	22574.7	22124.6	21946.2	22235.2
sp|Q15233|NONO_HUMAN	NONO	Non-POU domain-containing octamer-binding protein	89	14494.1	14280.7	14262.5	14284.1	14542.5	14320.8	14097.6	14156.9	14219.4
sp|Q8WXF1|PSPC1_HUMAN	PSPC1	Paraspeckle component 1	50	6496.87	6507.04	6388.91	6723.32	6638.62	6737.33	6626.28	6548.31	6545.75
sp|P55265-2|DSRAD_HUMAN	ADAR	Isoform 2 of Double-stranded RNA-specific adenosine deaminase	3	254.271	256.552	245.492	252.679	293.046	250.51	265.108	258.239	260.312
sp|P55265-4|DSRAD_HUMAN	ADAR	Isoform 4 of Double-stranded RNA-specific adenosine deaminase	104	18801.3	18786	18860.8	19745.8	19653.8	19409.8	19675.3	19577.8	19718.6
sp|P35658|NU214_HUMAN	NUP214	Nuclear pore complex protein Nup214	3	222.869	220.762	229.324	205.388	234.473	220.512	208.467	226.29	208.022
sp|P35658-3|NU214_HUMAN	NUP214	Isoform 3 of Nuclear pore complex protein Nup214	75	12962.3	12933.2	12871.8	12850.3	12905.7	12876.3	12655.6	12733.4	12804.6
sp|P06737|PYGL_HUMAN	PYGL	Glycogen phosphorylase, liver form	104	3269.03	3315.74	3958.22	3978.81	3979.38	3976.53	3882.66	3886.48	3883
sp|P11216|PYGB_HUMAN	PYGB	Glycogen phosphorylase, brain form	110	11751.3	11754.5	11839.2	12043.7	12005.8	11988.7	12222.1	12154.6	12311.3
sp|Q6SPF0|SAMD1_HUMAN	SAMD1	Atherin	11	1666.53	1712.77	1671.86	1543.05	1501.67	1583.26	1528.79	1505.46	1503.2
sp|Q15118|PDK1_HUMAN	PDK1	[Pyruvate dehydrogenase (acetyl-transferring)] kinase isozyme 1, mitochondrial	17	672.916	647.133	654.35	722.397	710.591	730.543	724.882	715.161	717.273
sp|Q15119|PDK2_HUMAN	PDK2	[Pyruvate dehydrogenase (acetyl-transferring)] kinase isozyme 2, mitochondrial	10	363.984	360.651	353.546	327.9	342.848	349.516	358.55	345.385	355.79
sp|Q15120-2|PDK3_HUMAN	PDK3	Isoform 2 of [Pyruvate dehydrogenase (acetyl-transferring)] kinase isozyme 3, mitochondrial	22	1905.92	1931.57	1981.72	1778.35	1850.8	1859.95	1957.52	1959.96	1992.53
sp|Q07820|MCL1_HUMAN	MCL1	Induced myeloid leukemia cell differentiation protein Mcl-1	7	228.05	231.025	220.147	269.74	271.909	290.833	195.946	191.607	191.656
sp|Q92610|ZN592_HUMAN	ZNF592	Zinc finger protein 592	17	1074.78	1060.4	1037.96	1053.59	1078.27	1016.4	1032.54	1023.05	1051.76
sp|Q5T6F2|UBAP2_HUMAN	UBAP2	Ubiquitin-associated protein 2	34	3205.62	3207.41	3231.4	3242.68	3250.05	3242.8	3111.71	3099.6	3082.34
sp|P54619-3|AAKG1_HUMAN	PRKAG1	Isoform 3 of 5'-AMP-activated protein kinase subunit gamma-1	13	1241.61	1254.66	1220.6	1154.18	1175.43	1144.65	1235.51	1230.57	1232.76
sp|Q9UGJ0|AAKG2_HUMAN	PRKAG2	5'-AMP-activated protein kinase subunit gamma-2	2	534.175	505.622	550.089	544.412	523.596	539.722	549.779	540.584	535.29
sp|O14682|ENC1_HUMAN	ENC1	Ectoderm-neural cortex protein 1	9	718.581	683.521	662.622	700.807	674.287	663.055	736.106	744.298	735.987
sp|O95793|STAU1_HUMAN	STAU1	Double-stranded RNA-binding protein Staufen homolog 1	49	6916.05	6898.23	7041.14	7240.81	7244.28	7194.88	6852.46	6783.05	6712.33
sp|Q9NUL3|STAU2_HUMAN	STAU2	Double-stranded RNA-binding protein Staufen homolog 2	18	3057.06	3064.78	3020.6	3040.36	3053.9	3023.51	2957.47	2951.88	2974.81
sp|Q7L2J0|MEPCE_HUMAN	MEPCE	7SK snRNA methylphosphate capping enzyme	36	3899.7	4047.73	3909.07	3903.38	3835.12	3915.57	3726.89	3783.05	3774.52
sp|P56181|NDUV3_HUMAN	NDUFV3	NADH dehydrogenase [ubiquinone] flavoprotein 3, mitochondrial	9	506.133	505.576	504.832	411.16	385.305	371.664	480.989	470.07	415.195
sp|P56181-2|NDUV3_HUMAN	NDUFV3	Isoform 2 of NADH dehydrogenase [ubiquinone] flavoprotein 3, mitochondrial	11	1104.55	1129.79	1146.28	1008.33	998.03	1005.17	1061.24	1057.82	1078.38
sp|P16298-4|PP2BB_HUMAN	PPP3CB	Isoform 4 of Serine/threonine-protein phosphatase 2B catalytic subunit beta isoform	16	1856.32	1829.28	1858.48	1856.59	1873.38	1850.07	1972.19	1913.01	1954.85
sp|P48454-3|PP2BC_HUMAN	PPP3CC	Isoform 3 of Serine/threonine-protein phosphatase 2B catalytic subunit gamma isoform	1	635.195	612.813	608.164	560.495	609.935	595.537	586.977	564.191	578.028
sp|Q08209-2|PP2BA_HUMAN	PPP3CA	Isoform 2 of Serine/threonine-protein phosphatase 2B catalytic subunit alpha isoform	19	5531.77	5443.55	5551.17	5490.07	5315.12	5513.11	5644.87	5682.97	5649.41
sp|Q9HAF1-3|EAF6_HUMAN	MEAF6	Isoform 3 of Chromatin modification-related protein MEAF6	14	2144.43	2206.76	2047.76	2109.39	2058.16	2109.04	1919.15	1937.5	1941.31
sp|O75691|UTP20_HUMAN	UTP20	Small subunit processome component 20 homolog	92	9346.57	9542.58	9610.25	10026.4	9860.88	10007.4	10116.5	10409.4	10260.9
sp|Q8IVH2|FOXP4_HUMAN	FOXP4	Forkhead box protein P4	14	639.688	659.779	665.303	657.827	607.672	639.683	615.518	618.816	649.067
sp|Q9H334-8|FOXP1_HUMAN	FOXP1	Isoform 8 of Forkhead box protein P1	4	258.426	246.419	240.609	252.564	231.517	269.415	247.236	250.246	230.95
sp|P38435|VKGC_HUMAN	GGCX	Vitamin K-dependent gamma-carboxylase	22	914.349	935.764	993.696	938.905	979.768	966.83	927.438	964.411	938.289
sp|O75694|NU155_HUMAN	NUP155	Nuclear pore complex protein Nup155	86	10961.4	11131.1	11118.9	10853.2	10922.7	10811	10970	11099.2	11031.7
sp|O00499|BIN1_HUMAN	BIN1	Myc box-dependent-interacting protein 1	31	8291.7	8250.21	8098.69	7774.75	7727.02	7800.36	7884.7	7818.65	8062.88
sp|O95817|BAG3_HUMAN	BAG3	BAG family molecular chaperone regulator 3	14	927.629	953.486	1005.14	1096.76	1068.77	1063.65	959.593	976.015	971.917
sp|Q9BRP8|PYM1_HUMAN	PYM1	Partner of Y14 and mago	22	3343.17	3363.67	3348.81	3315.63	3270.19	3316.78	3264.17	3245.59	3228.68
sp|Q7Z2K8|GRIN1_HUMAN	GPRIN1	G protein-regulated inducer of neurite outgrowth 1	56	16420	16203.3	16032.4	15660.2	15913	15795.7	16285.9	16226	16477.2
sp|Q13435|SF3B2_HUMAN	SF3B2	Splicing factor 3B subunit 2	120	19217.3	19082	18860.5	18980.6	18826.1	18900	18108.1	17889.2	17781.9
sp|Q86YV5|PRAG1_HUMAN	PRAG1	Inactive tyrosine-protein kinase PRAG1	4	111.509	135.659	129.339	135.927	135.714	120.699	116.1	124.582	121.028
sp|Q05BQ5|MBTD1_HUMAN	MBTD1	MBT domain-containing protein 1	8	800.631	813.084	792.719	792.073	779.045	790.059	798.653	809.828	820.785
sp|Q969R5|LMBL2_HUMAN	L3MBTL2	Lethal(3)malignant brain tumor-like protein 2	16	1336.44	1362.3	1314.75	1362.62	1375.87	1337.94	1351.84	1385.5	1373.74
sp|Q96GA3|LTV1_HUMAN	LTV1	Protein LTV1 homolog	28	5398.24	5356.05	5302.09	5192.39	5101.07	5054.28	5061.39	4990.56	5063.29
sp|P18583-5|SON_HUMAN	SON	Isoform D of Protein SON	97	10632.6	10443.4	10502.3	10508.3	10602.8	10464.7	10262.9	10186.8	10235.7
sp|Q96HP0|DOCK6_HUMAN	DOCK6	Dedicator of cytokinesis protein 6	44	4309.13	4452.7	4270.18	3867.83	3956.54	3973.51	4175.51	4244.92	4286.34
sp|Q96N67|DOCK7_HUMAN	DOCK7	Dedicator of cytokinesis protein 7	105	12907.8	13011	12832.7	12502.6	12544.6	12512.2	12809.8	12785.2	12855.5
sp|Q92823-5|NRCAM_HUMAN	NRCAM	Isoform 5 of Neuronal cell adhesion molecule	82	21983.5	21601.9	21650.8	19718.3	19823.7	19803.1	17757.6	17884.7	18049
sp|Q9NR12|PDLI7_HUMAN	PDLIM7	PDZ and LIM domain protein 7	33	5484.92	5490.03	5355.57	5378.88	5497.63	5408.35	5421.57	5386.76	5355.79
sp|P41440|S19A1_HUMAN	SLC19A1	Reduced folate transporter	9	588.606	585.066	617.479	763.719	720.794	709.992	624.817	648.341	642.153
sp|P37837|TALDO_HUMAN	TALDO1	Transaldolase	81	13540.2	13413.9	13747.7	13637.5	13417.9	13607.9	13819.1	13941.6	13772.9
sp|Q96E22|NGBR_HUMAN	NUS1	Dehydrodolichyl diphosphate synthase complex subunit NUS1	11	554.197	552.604	553.433	545.192	536.822	536.851	501.329	544.357	526.012
sp|P06132|DCUP_HUMAN	UROD	Uroporphyrinogen decarboxylase	16	1067.8	1062.98	1033.81	899.603	943.175	950.718	974.297	986.866	964.764
sp|Q92576|PHF3_HUMAN	PHF3	PHD finger protein 3	64	6274.11	6264.05	6227.35	5998.02	6068.56	5959.39	5925.56	5912.83	5944.47
sp|Q9BTC0|DIDO1_HUMAN	DIDO1	Death-inducer obliterator 1	64	9074.89	9053.63	9060.42	8680.22	8757.89	8633.38	8321.08	8504.2	8521.1
sp|P62995|TRA2B_HUMAN	TRA2B	Transformer-2 protein homolog beta	33	7092.29	7157.11	7159.58	7593.36	7636.39	7604.8	7370.12	7519.64	7604.4
sp|Q13595|TRA2A_HUMAN	TRA2A	Transformer-2 protein homolog alpha	14	3716.82	3743.27	3707.02	3584.96	3608.01	3683.87	3654.77	3666.73	3702.68
sp|P04075-2|ALDOA_HUMAN	ALDOA	Isoform 2 of Fructose-bisphosphate aldolase A	98	8065.62	8128.96	8389.49	8817.4	8600.64	8721.58	8525.56	8589.62	8320.35
sp|P09972|ALDOC_HUMAN	ALDOC	Fructose-bisphosphate aldolase C	22	2809.05	2869.96	2849.78	2934.22	2935.35	2866.76	3043.77	2976.41	2978.34
tr|J3QKK1|J3QKK1_HUMAN	ALDOC	Fructose-bisphosphate aldolase C (Fragment)	1	4.77077	5.54955	9.02458	3.5666	5.24268	5.91238	0	3.29204	2.75905
tr|J3QKP5|J3QKP5_HUMAN	ALDOC	Fructose-bisphosphate aldolase C (Fragment)	2	404.583	388.806	444.906	418.165	449.746	447.778	426.056	435.378	460.782
sp|P35520-2|CBS_HUMAN	CBS	Isoform 2 of Cystathionine beta-synthase	44	9803.38	9695.33	9567.18	9281.47	9393.01	9332.55	9803.48	9700.34	9752.37
sp|Q9NW08|RPC2_HUMAN	POLR3B	DNA-directed RNA polymerase III subunit RPC2	43	3743.61	3799.15	3785.22	3834.23	3823.1	3782.42	3943.7	3958.92	3937.49
sp|O60232|ZNRD2_HUMAN	ZNRD2	Protein ZNRD2	21	3268.13	3287.55	3158.78	2782.38	2821.87	2831.05	2947.14	2926.07	2893.14
sp|Q9C0H9|SRCN1_HUMAN	SRCIN1	SRC kinase signaling inhibitor 1	12	1605.52	1599.68	1557.4	1447.35	1462.43	1407.26	1460.5	1475.78	1525.78
sp|O75449|KTNA1_HUMAN	KATNA1	Katanin p60 ATPase-containing subunit A1	10	631.939	604.214	585.839	590.642	547.525	558.868	572.766	568.417	575.905
sp|Q9BW62|KATL1_HUMAN	KATNAL1	Katanin p60 ATPase-containing subunit A-like 1	20	1995.56	1993.74	1909.04	1829.42	1864.51	1870.37	1850.97	1918.7	1966.52
sp|Q13952|NFYC_HUMAN	NFYC	Nuclear transcription factor Y subunit gamma	5	1078.43	1039.35	1032.85	1043.48	990.758	1022.63	1013.64	1020.31	992.668
sp|Q16134|ETFD_HUMAN	ETFDH	Electron transfer flavoprotein-ubiquinone oxidoreductase, mitochondrial	14	727.374	718.14	721.191	748.153	700.042	725.055	695.89	698.016	724.008
sp|Q7Z5K2-3|WAPL_HUMAN	WAPL	Isoform 3 of Wings apart-like protein homolog	69	7839.65	7651.74	7715.36	7664.82	7583.78	7563.62	7790.87	7844.14	7691.27
sp|Q15075|EEA1_HUMAN	EEA1	Early endosome antigen 1	100	8216.31	8123.7	8673.41	8679.91	8648.76	8591.49	8453.17	8600.46	8442.52
sp|P19367-3|HXK1_HUMAN	HK1	Isoform 3 of Hexokinase-1	92	21280.5	20969	20752.1	20782.2	20912.2	20946	21427.4	21457.5	21760.2
sp|P52789|HXK2_HUMAN	HK2	Hexokinase-2	72	6745.5	6799.06	6901.14	7275.69	7234.01	7207.82	7312.99	7279.26	7233.38
sp|Q2TB90|HKDC1_HUMAN	HKDC1	Hexokinase HKDC1	41	354.247	346.214	446.036	443.508	417.363	438.985	443.306	430.813	421.811
sp|P55268|LAMB2_HUMAN	LAMB2	Laminin subunit beta-2	36	567.552	640.556	699.658	639.996	606.197	618.947	702.705	709.947	695.082
sp|Q9HBH0|RHOF_HUMAN	RHOF	Rho-related GTP-binding protein RhoF	14	546.489	524.691	561.871	564.864	570.486	583.587	520.181	527.902	536.039
sp|P09622|DLDH_HUMAN	DLD	Dihydrolipoyl dehydrogenase, mitochondrial	72	13776.4	13985.3	13897.4	13369	13349.4	13500.1	13200.2	13305.6	13415.1
sp|Q9NZL4-3|HPBP1_HUMAN	HSPBP1	Isoform 3 of Hsp70-binding protein 1	28	2848	2945.59	2872.26	3044.47	3130.78	3056.01	3351.35	3325.34	3399.02
tr|K7EL16|K7EL16_HUMAN	HSPBP1	Hsp70-binding protein 1 (Fragment)	1	291.728	285.294	250.689	283.263	267.051	274.264	270.017	289.082	284.82
sp|Q96D71|REPS1_HUMAN	REPS1	RalBP1-associated Eps domain-containing protein 1	26	2831.8	2874.13	2811.46	2761.83	2832.77	2804.25	2729.14	2682.43	2716.5
sp|Q9UBV7|B4GT7_HUMAN	B4GALT7	Beta-1,4-galactosyltransferase 7	5	46.3621	35.0888	43.6529	35.6575	39.1606	34.8542	33.9405	35.8167	35.7398
sp|Q969V3|NCLN_HUMAN	NCLN	Nicalin	44	3577.72	3612.18	3615.56	4459.89	4330.39	4365.93	4112.66	4239.01	4180.8
sp|Q68CQ4|DIEXF_HUMAN	DIEXF	Digestive organ expansion factor homolog	44	7481.43	7492.14	7527.02	7860.09	7960.69	7945.09	7784.98	7700.91	7775.33
sp|Q99623|PHB2_HUMAN	PHB2	Prohibitin-2	89	9658.83	9703.06	9730.3	9244.72	9161.95	9166.85	9572.21	9361.06	9409.97
sp|P07942|LAMB1_HUMAN	LAMB1	Laminin subunit beta-1	104	9101.42	9105.26	9332.45	9679.43	9645.96	9578.26	10324.7	10503.9	10483.3
sp|P05455|LA_HUMAN	SSB	Lupus La protein	88	17903	18055.2	18114.8	18563.2	18533.7	18671.3	18258.5	18376.1	18253.8
sp|P48729|KC1A_HUMAN	CSNK1A1	Casein kinase I isoform alpha	8	369.722	394.993	378.902	393.706	393.583	383.839	376.212	376.071	388.144
sp|Q13233|M3K1_HUMAN	MAP3K1	Mitogen-activated protein kinase kinase kinase 1	15	2468.06	2529.05	2422.32	2432.05	2400.67	2376.26	2400.98	2422.38	2379.25
sp|P78563-5|RED1_HUMAN	ADARB1	Isoform 5 of Double-stranded RNA-specific editase 1	15	702.442	712.94	714.019	688.834	680.959	696.636	736.066	716.92	728.64
sp|Q9NUU7|DD19A_HUMAN	DDX19A	ATP-dependent RNA helicase DDX19A	12	1620.29	1575.03	1635.59	1686.31	1691.27	1662.71	1567.25	1597.36	1672.12
sp|Q9UHL0|DDX25_HUMAN	DDX25	ATP-dependent RNA helicase DDX25	4	306.548	289.561	284.082	270.062	300.494	285.056	304.732	308.264	297.301
sp|Q9UMR2|DD19B_HUMAN	DDX19B	ATP-dependent RNA helicase DDX19B	19	1950.34	1901.59	1894.81	1960	1973.09	1949.61	1912.28	1931.42	1877.84
sp|P46459|NSF_HUMAN	NSF	Vesicle-fusing ATPase	98	12315.4	12397.7	12376.5	12721.7	12675.4	12868.9	12982.8	13046.6	12740.7
sp|Q969G3|SMCE1_HUMAN	SMARCE1	SWI/SNF-related matrix-associated actin-dependent regulator of chromatin subfamily E member 1	8	1506.05	1503.71	1477.99	1362.09	1406.81	1382.17	1426.03	1371.28	1426.82
sp|Q5VIR6-4|VPS53_HUMAN	VPS53	Isoform 4 of Vacuolar protein sorting-associated protein 53 homolog	44	5851.82	5936.91	5894.58	5692.57	5723.95	5833.1	5909.7	5984.21	5936.05
sp|Q6NXR4|TTI2_HUMAN	TTI2	TELO2-interacting protein 2	17	1702.59	1737.88	1707.82	1670.31	1663.68	1615.98	1666.93	1745.96	1693.06
sp|Q6PK04|CC137_HUMAN	CCDC137	Coiled-coil domain-containing protein 137	13	1485.26	1449.4	1482.68	1532.29	1595.6	1547.83	1461.15	1485.13	1491.44
sp|Q96EA4|SPDLY_HUMAN	SPDL1	Protein Spindly	23	3552.51	3517.66	3539.6	3456.77	3436.68	3462.34	3284.48	3284.27	3254.96
sp|Q5VZF2|MBNL2_HUMAN	MBNL2	Muscleblind-like protein 2	3	619.798	649.187	654.175	636.187	638.764	655.445	606.311	610.747	627.012
sp|Q9NR56|MBNL1_HUMAN	MBNL1	Muscleblind-like protein 1	9	1211.34	1203.93	1157.15	1225.59	1255.13	1183.24	1175.26	1189.96	1172.88
sp|Q9NUK0|MBNL3_HUMAN	MBNL3	Muscleblind-like protein 3	7	332.029	312.41	378.173	328.046	336.613	317.348	322.841	346.769	340.279
sp|Q9NRR4|RNC_HUMAN	DROSHA	Ribonuclease 3	8	333.679	326.221	338.763	339.592	308.851	339.471	308.138	321.814	339.554
sp|Q9BTW9|TBCD_HUMAN	TBCD	Tubulin-specific chaperone D	54	8812.54	8973.93	8870.24	8143.05	8213.33	8182.34	8982.57	9000.34	9121.29
sp|Q9UKY7|CDV3_HUMAN	CDV3	Protein CDV3 homolog	17	2647.22	2517.19	2551.53	2797.1	2821.03	2810.66	2631.08	2629.35	2628.97
sp|O00116|ADAS_HUMAN	AGPS	Alkyldihydroxyacetonephosphate synthase, peroxisomal	52	9188.36	9045.12	8926.18	9414.18	9369.44	9319.45	9193.3	9078.94	9148.35
sp|O75367|H2AY_HUMAN	H2AFY	Core histone macro-H2A.1	82	11525.4	11380.8	11391.5	13077.2	13139.6	13134.1	12975.7	12812.2	12745.9
sp|Q9P0M6|H2AW_HUMAN	H2AFY2	Core histone macro-H2A.2	67	14200.2	14134.4	14040.3	14945	14912.9	14924.6	15333.6	15116.1	15317.1
sp|O00154|BACH_HUMAN	ACOT7	Cytosolic acyl coenzyme A thioester hydrolase	63	9231.04	9024.12	9130.28	9030.5	9058.62	9016.83	9144.6	8986.39	8891.58
sp|Q96HY6|DDRGK_HUMAN	DDRGK1	DDRGK domain-containing protein 1	12	887.885	884.433	903.862	985.88	958.931	990.293	961.722	987.115	986.986
sp|O75170-3|PP6R2_HUMAN	PPP6R2	Isoform 3 of Serine/threonine-protein phosphatase 6 regulatory subunit 2	47	3199.49	3287.54	3225.05	3003.37	2945.03	3118.75	3065.38	3086.99	3069.63
sp|Q5H9R7-5|PP6R3_HUMAN	PPP6R3	Isoform 5 of Serine/threonine-protein phosphatase 6 regulatory subunit 3	31	4915.85	4841.72	4924.31	4828.99	4895.18	4855.39	5059.23	5002.83	5007.29
sp|P30793|GCH1_HUMAN	GCH1	GTP cyclohydrolase 1	6	1645.49	1693.75	1626.61	1663.56	1722.54	1690.8	1768.84	1756.01	1806.71
sp|Q9BSJ2-4|GCP2_HUMAN	TUBGCP2	Isoform 3 of Gamma-tubulin complex component 2	68	10091.6	10116.7	10066.6	9725.77	9949.7	9909.77	10277.2	10209.9	10135.9
sp|Q96C12|ARMC5_HUMAN	ARMC5	Armadillo repeat-containing protein 5	9	302.683	299.155	286.513	285.738	275.336	301.887	288.279	299.456	290.639
sp|P13861|KAP2_HUMAN	PRKAR2A	cAMP-dependent protein kinase type II-alpha regulatory subunit	40	4998.78	5003.39	5044.28	4890.97	4722	4836.85	4845.27	4794.48	4824.89
sp|P31323|KAP3_HUMAN	PRKAR2B	cAMP-dependent protein kinase type II-beta regulatory subunit	19	3679.12	3632.27	3625.77	3311	3309.34	3297.42	3373.55	3403.82	3393.59
sp|Q6FI81|CPIN1_HUMAN	CIAPIN1	Anamorsin	39	4976.19	5063.11	5009.46	4914.06	4825.77	4931.02	4862.56	4895.35	4751.67
sp|Q6PL18|ATAD2_HUMAN	ATAD2	ATPase family AAA domain-containing protein 2	55	6976.27	6847.41	6891.45	6829.25	6858.7	6813.07	6735.88	6815.19	6780.69
sp|Q9ULI0|ATD2B_HUMAN	ATAD2B	ATPase family AAA domain-containing protein 2B	39	5343.58	5349.13	5281.81	5320.53	5213.15	5389	5337.87	5378.45	5408.05
sp|P19532|TFE3_HUMAN	TFE3	Transcription factor E3	6	736.307	771.879	747.932	763.826	772.831	744.123	721.257	724.608	704.644
sp|Q8N1G0|ZN687_HUMAN	ZNF687	Zinc finger protein 687	26	3344.54	3380.25	3384.67	3391.42	3390.38	3389.32	3359.56	3308.14	3316.51
sp|Q9HCE3|ZN532_HUMAN	ZNF532	Zinc finger protein 532	17	2643.09	2647.45	2580.8	2600.02	2607.2	2557.92	2581.65	2592.23	2600.74
sp|P23434|GCSH_HUMAN	GCSH	Glycine cleavage system H protein, mitochondrial	14	963.326	1021.14	985.487	992.489	957.512	994.718	1018.34	1042.84	986.156
sp|Q641Q2|WAC2A_HUMAN	WASHC2A	WASH complex subunit 2A	16	1501.83	1456.97	1408.35	1382.44	1431.96	1427.98	1378.64	1326.77	1368.12
tr|A0A096LPC5|A0A096LPC5_HUMAN	WASHC2C	WASH complex subunit 2C	11	588.857	583.847	596.296	563.063	575.628	575.07	505.26	533.61	533.297
sp|P08758|ANXA5_HUMAN	ANXA5	Annexin A5	111	5487.77	5607.87	5841.15	6252.16	6219.63	6188.7	6191.61	6126.93	6163.46
sp|P09525|ANXA4_HUMAN	ANXA4	Annexin A4	73	1677.13	1718.09	2050.29	2085.7	2006.46	2036.5	1924.15	1951.74	1917.32
sp|Q96CM8-2|ACSF2_HUMAN	ACSF2	Isoform 2 of Medium-chain acyl-CoA ligase ACSF2, mitochondrial	47	2349.81	2417.15	2726.59	2464.04	2429.49	2488.43	2442.85	2399.09	2389.31
sp|P26640|SYVC_HUMAN	VARS	Valine--tRNA ligase	122	16190	16190.7	16270.8	16292	16135.7	16249.2	17065.4	17071.1	16981.3
sp|O00192|ARVC_HUMAN	ARVCF	Armadillo repeat protein deleted in velo-cardio-facial syndrome	44	5695.08	5759.61	5642.74	5417.41	5398.79	5357.58	5414.39	5526.54	5560.07
sp|P23588|IF4B_HUMAN	EIF4B	Eukaryotic translation initiation factor 4B	30	4817.76	4883.41	4800.9	4789.96	4909.66	4809.52	4383.61	4498.95	4468.03
sp|A8MXV4|NUD19_HUMAN	NUDT19	Nucleoside diphosphate-linked moiety X motif 19	12	2068.37	2066.39	2055.27	1913.4	1892.84	1947.1	2050.45	2094.72	2074.68
sp|Q92538|GBF1_HUMAN	GBF1	Golgi-specific brefeldin A-resistance guanine nucleotide exchange factor 1	71	5479.67	5567.95	5638.07	5413.69	5325.7	5476.83	5439.48	5511.94	5572.45
sp|O96007|MOC2B_HUMAN	MOCS2	Molybdopterin synthase catalytic subunit	7	508.274	486.982	504.702	509.671	483.386	500.937	514.426	507.39	527.131
sp|Q96N66|MBOA7_HUMAN	MBOAT7	Lysophospholipid acyltransferase 7	13	1339.4	1361.12	1352.41	1526.33	1501.29	1470.35	1429.6	1447.7	1495.43
sp|P11182|ODB2_HUMAN	DBT	Lipoamide acyltransferase component of branched-chain alpha-keto acid dehydrogenase complex, mitochondrial	32	4557.96	4531.57	4578.82	4460.84	4331.16	4382.19	4361.6	4374.73	4273.66
sp|O14521|DHSD_HUMAN	SDHD	Succinate dehydrogenase [ubiquinone] cytochrome b small subunit, mitochondrial	4	258.383	240.746	216.075	251.01	283.625	261.837	241.553	252.881	271.751
sp|Q96NL6|SCLT1_HUMAN	SCLT1	Sodium channel and clathrin linker 1	4	147.87	164.454	149.981	166.667	152.602	148.71	156.75	147.184	144.532
sp|Q86VY4|TSYL5_HUMAN	TSPYL5	Testis-specific Y-encoded-like protein 5	20	1796.84	1818	1718.8	1681.28	1672.12	1676.66	1574.97	1603.22	1611.72
sp|P11388-4|TOP2A_HUMAN	TOP2A	Isoform 4 of DNA topoisomerase 2-alpha	90	6645.16	6722.13	6822.03	8256.42	8039.65	8199.64	7432.63	7706.75	7567.08
sp|Q02880|TOP2B_HUMAN	TOP2B	DNA topoisomerase 2-beta	132	18704.5	18769.3	18652.6	21188.4	21176.5	20990.8	21161.4	21025.6	21139.7
tr|H7BZ82|H7BZ82_HUMAN	TOP2B	DNA topoisomerase 2-beta (Fragment)	1	58.1179	48.3327	47.166	52.1185	42.1723	50.5912	53.2423	48.0519	54.2896
sp|Q9UHL4|DPP2_HUMAN	DPP7	Dipeptidyl peptidase 2	21	3547.01	3554.11	3579.11	3340.9	3272.55	3247.63	3526.78	3525.16	3499.13
sp|P13667|PDIA4_HUMAN	PDIA4	Protein disulfide-isomerase A4	145	15126.5	15295	15670.8	17814.9	17644.6	17629.7	16743.2	16715.1	16476.6
sp|P30101|PDIA3_HUMAN	PDIA3	Protein disulfide-isomerase A3	146	14257.9	14108.5	14602.8	16045.3	15971.3	15727.2	15269.2	15025	15023.8
tr|A0A499FI48|A0A499FI48_HUMAN	PDIA4	Protein disulfide-isomerase	2	74.4352	89.0661	83.0897	99.7715	87.8148	79.5786	91.6391	96.8381	96.2861
tr|H7BZJ3|H7BZJ3_HUMAN	PDIA3	Protein disulfide-isomerase A3 (Fragment)	9	932.19	910.359	932.728	988.931	976.278	943.844	958.288	940.693	941.131
sp|P53041|PPP5_HUMAN	PPP5C	Serine/threonine-protein phosphatase 5	55	7991.69	8123.52	7872.18	7991.02	7917.64	7851.48	7931.66	7920.16	7909.73
sp|Q5VW36|FOCAD_HUMAN	FOCAD	Focadhesin	28	3275.1	3288.64	3355.99	3099.91	3113.06	3154.42	3325.04	3323.23	3307.3
sp|Q14678|KANK1_HUMAN	KANK1	KN motif and ankyrin repeat domain-containing protein 1	38	941.705	931.254	1008.87	944.198	1006.04	923.18	961.656	967.308	938.897
sp|Q5T7N3|KANK4_HUMAN	KANK4	KN motif and ankyrin repeat domain-containing protein 4	14	347.71	345.324	382.613	348.608	353.259	351.216	308.075	318.765	326.208
sp|Q63ZY3-2|KANK2_HUMAN	KANK2	Isoform 2 of KN motif and ankyrin repeat domain-containing protein 2	16	1588.85	1498.95	1538.02	1455.64	1419.41	1451.77	1440.56	1411.31	1413.88
sp|O75592|MYCB2_HUMAN	MYCBP2	E3 ubiquitin-protein ligase MYCBP2	64	6092	6117.44	6101.43	6093.61	6046.42	6140.3	6264.15	6233.75	6333.92
sp|P16870|CBPE_HUMAN	CPE	Carboxypeptidase E	28	5723.29	5700.53	5592.36	3712.86	3767.24	3796.68	4924.27	4856.05	4918.04
sp|Q8N8S7|ENAH_HUMAN	ENAH	Protein enabled homolog	47	6696.25	6563.63	6530.15	6617.67	6543.88	6662.02	6253.29	6233.31	6194.16
sp|Q9UI08-2|EVL_HUMAN	EVL	Isoform 1 of Ena/VASP-like protein	5	374.689	362.869	358.765	340.376	326.202	333.465	312.637	318.942	328.235
tr|A0A0U1RRM6|A0A0U1RRM6_HUMAN	ENAH	Protein enabled homolog	2	55.0059	60.9678	56.5414	58.0268	57.2119	58.0368	50.8574	51.2165	50.8866
sp|O15127|SCAM2_HUMAN	SCAMP2	Secretory carrier-associated membrane protein 2	12	634.929	637.101	636.125	629.973	644.106	628.54	597.405	600.278	592.764
tr|H3BUB6|H3BUB6_HUMAN	SCAMP2	Secretory carrier-associated membrane protein (Fragment)	1	17.726	12.3201	20.2319	34.5874	20.08	13.9249	15.1029	13.6932	14.2136
sp|O15015|ZN646_HUMAN	ZNF646	Zinc finger protein 646	4	201.241	200.902	191.736	201.081	198.367	187.716	172.579	184.907	172.168
sp|Q9C0C2|TB182_HUMAN	TNKS1BP1	182 kDa tankyrase-1-binding protein	50	6113.7	6068.34	6124.62	6114.32	6026.83	6176.64	5827.23	5881.49	5911.67
sp|Q8TBA6|GOGA5_HUMAN	GOLGA5	Golgin subfamily A member 5	35	2605.26	2650.02	2613.08	3173.92	3178.13	3140.51	2765.43	2782.01	2793.55
sp|Q9Y446-2|PKP3_HUMAN	PKP3	Isoform PKP3b of Plakophilin-3	27	204.641	225.267	260.435	249.862	237.53	238.739	258.015	254.818	263.659
sp|O95819-2|M4K4_HUMAN	MAP4K4	Isoform 2 of Mitogen-activated protein kinase kinase kinase kinase 4	2	57.3638	56.8253	52.0296	46.6144	45.7911	58.8229	49.4223	54.9519	54.1726
sp|O95819-3|M4K4_HUMAN	MAP4K4	Isoform 3 of Mitogen-activated protein kinase kinase kinase kinase 4	13	1105.18	1080.4	1145.14	1083.72	1099.93	1140.21	1064.84	1134.12	1093.99
sp|Q8N4C8|MINK1_HUMAN	MINK1	Misshapen-like kinase 1	7	435.555	465.448	459.361	430.215	422.213	403.576	409.707	422.721	436.172
sp|Q9UKE5|TNIK_HUMAN	TNIK	TRAF2 and NCK-interacting protein kinase	3	87.8749	83.4471	85.5735	79.69	90.2928	91.6288	79.6831	82.9964	81.5433
sp|A2RU67|F234B_HUMAN	FAM234B	Protein FAM234B	5	160.588	170.079	150.115	150.854	154.857	130.092	157.374	155.747	150.29
sp|P00519-2|ABL1_HUMAN	ABL1	Isoform IB of Tyrosine-protein kinase ABL1	9	1139.48	1098.28	1135.83	1070.88	1103.12	1099.72	1004.18	1051.74	1071.48
sp|P42684|ABL2_HUMAN	ABL2	Tyrosine-protein kinase ABL2	14	1040.06	1048.48	1020.89	1044.83	1055.35	1031.82	999.163	1012.96	1012.01
sp|O95071|UBR5_HUMAN	UBR5	E3 ubiquitin-protein ligase UBR5	109	11915.7	11791.5	11926.4	11800.9	11870.8	11830.1	11932.7	12057.2	11899.9
sp|Q15032-2|R3HD1_HUMAN	R3HDM1	Isoform 2 of R3H domain-containing protein 1	1	15.8066	13.4997	12.6815	10.2784	7.9961	13.1235	11.609	11.5635	8.29064
sp|Q15032-3|R3HD1_HUMAN	R3HDM1	Isoform 3 of R3H domain-containing protein 1	13	1057.15	1050.86	1064.62	1005.33	995.705	971.328	971.155	966.966	940.598
sp|Q9Y2K5|R3HD2_HUMAN	R3HDM2	R3H domain-containing protein 2	1	90.1624	89.5139	80.3909	78.6475	74.5499	83.1446	74.3484	76.6869	74.9625
sp|P06746|DPOLB_HUMAN	POLB	DNA polymerase beta	19	2524.7	2527.67	2482.11	2422.82	2407.65	2440.77	2455.34	2386.44	2450.17
sp|Q15058|KIF14_HUMAN	KIF14	Kinesin-like protein KIF14	41	5669	5546.17	5503.85	5435.31	5568.12	5521.05	5359.05	5450.12	5422.37
sp|Q15361|TTF1_HUMAN	TTF1	Transcription termination factor 1	27	3181.31	3216.26	3170.64	3207.58	3338.95	3289.32	3097.71	3114.34	3060.22
sp|Q5THJ4|VP13D_HUMAN	VPS13D	Vacuolar protein sorting-associated protein 13D	27	1219.03	1166.29	1177.86	1156.62	1163.28	1132.68	1144.18	1140.51	1148.33
sp|Q9Y2H2|SAC2_HUMAN	INPP5F	Phosphatidylinositide phosphatase SAC2	7	604.107	570.921	580.89	619.923	645.619	629.174	594.081	587.148	627.915
tr|A0A0J9YY79|A0A0J9YY79_HUMAN	INPP5F	Phosphatidylinositide phosphatase SAC2 (Fragment)	1	75.381	78.7505	78.6956	133.338	157.556	139.409	118.572	128.396	146.963
sp|Q9Y3F4-2|STRAP_HUMAN	STRAP	Isoform 2 of Serine-threonine kinase receptor-associated protein	72	14092.1	14040.8	13797.3	13788.4	13850.6	13941.2	14050.9	13912.5	13751.5
sp|Q96MX3|ZNF48_HUMAN	ZNF48	Zinc finger protein 48	10	1226.37	1209.1	1241.13	1234.81	1258.79	1230.7	1232.51	1266.92	1258.97
sp|Q9UJA5|TRM6_HUMAN	TRMT6	tRNA (adenine(58)-N(1))-methyltransferase non-catalytic subunit TRM6	33	5079.22	5021.41	4983.15	4993.3	4931.93	4967.21	4990.3	4973.34	4955.05
sp|Q8N1F8|S11IP_HUMAN	STK11IP	Serine/threonine-protein kinase 11-interacting protein	20	926.706	933.809	944.477	905.454	907.629	876.456	932.635	940.674	953.972
sp|Q96BD5-3|PF21A_HUMAN	PHF21A	Isoform 3 of PHD finger protein 21A	12	1752.02	1697.87	1650.02	1623.92	1639.49	1648.52	1645.08	1674.77	1676.63
sp|O60229|KALRN_HUMAN	KALRN	Kalirin	18	1258.52	1325.14	1240.59	1155.29	1177.17	1208.49	1248.82	1229.15	1262.46
sp|O60229-6|KALRN_HUMAN	KALRN	Isoform 6 of Kalirin	4	64.6704	66.2066	63.9977	67.0144	68.6538	59.7883	61.0998	65.314	71.2072
sp|O75962|TRIO_HUMAN	TRIO	Triple functional domain protein	73	10885.3	10956.9	10868.4	10495.4	10567.1	10598.2	10881.9	10912.2	11073
sp|Q86VW2-3|ARHGP_HUMAN	ARHGEF25	Isoform 3 of Rho guanine nucleotide exchange factor 25	1	40.8439	46.1889	51.0718	49.1481	42.919	44.7369	44.303	58.6425	45.8421
sp|Q6WCQ1|MPRIP_HUMAN	MPRIP	Myosin phosphatase Rho-interacting protein	39	5240.04	5080.49	5105.46	4864.44	4813.57	4962.24	4932.25	4844.82	4859.15
tr|A0A494BZV2|A0A494BZV2_HUMAN	MPRIP	Myosin phosphatase Rho-interacting protein	10	1073.58	1075.67	1095.3	953.433	1002.09	964.843	1045.69	1040.92	1039.1
sp|P82094|TMF1_HUMAN	TMF1	TATA element modulatory factor	46	5076.4	4932.68	5024.8	5828.85	5795.86	5793.98	5103.91	5207.38	5208.38
sp|Q8N9M1|CS047_HUMAN	C19orf47	Uncharacterized protein C19orf47	7	1045.41	1050.22	1018.61	939.666	955.926	937.127	1015.01	1017.45	992.533
sp|O15143|ARC1B_HUMAN	ARPC1B	Actin-related protein 2/3 complex subunit 1B	22	2913.22	2988.76	2936.93	3008.38	3011.57	2996.97	2947.25	2991.67	2965.63
sp|Q92747|ARC1A_HUMAN	ARPC1A	Actin-related protein 2/3 complex subunit 1A	36	6386.41	6330.05	6247.94	6195.79	6168.03	6105.88	6340.35	6323.33	6222.25
sp|O15294|OGT1_HUMAN	OGT	UDP-N-acetylglucosamine--peptide N-acetylglucosaminyltransferase 110 kDa subunit	56	8303.31	8281.91	8203.44	8842.17	9005.62	8940.23	8479.89	8409.5	8426.48
sp|Q9HCC0|MCCB_HUMAN	MCCC2	Methylcrotonoyl-CoA carboxylase beta chain, mitochondrial	64	5341.04	5430.8	5499.88	5264.08	5288.72	5312.31	5346.34	5403.12	5324.76
tr|D6RD67|D6RD67_HUMAN	MCCC2	Methylcrotonoyl-CoA carboxylase beta chain, mitochondrial (Fragment)	1	10.6444	14.8947	13.1022	10.1445	10.6491	13.3552	14.739	11.4099	9.35649
sp|Q8IYB7|DI3L2_HUMAN	DIS3L2	DIS3-like exonuclease 2	74	7489.2	7565.73	7447.58	7368.89	7426.77	7475.63	7546.41	7618.47	7606.32
sp|A0AVF1|IFT56_HUMAN	TTC26	Intraflagellar transport protein 56	5	421.803	452.092	434.311	407.255	402.507	449.819	435.386	470.814	470.062
sp|Q96GQ5|RUS1_HUMAN	C16orf58	RUS1 family protein C16orf58	9	1515.13	1483	1480.15	1545.76	1583.42	1586.47	1637.11	1632.93	1603.83
sp|Q9H329|E41LB_HUMAN	EPB41L4B	Band 4.1-like protein 4B	7	534.154	484.027	484.46	478.622	513.015	483.615	487.491	488.965	483.762
sp|Q9HCM4|E41L5_HUMAN	EPB41L5	Band 4.1-like protein 5	30	4116.4	4155.04	4126.72	3972.06	4076.18	4101.04	3877.46	3884.23	3920.13
sp|Q15003|CND2_HUMAN	NCAPH	Condensin complex subunit 2	58	8339.85	8258.04	8138.25	7963.52	7854.11	8047.16	7898.58	8085.31	7950.07
sp|Q53GS7|GLE1_HUMAN	GLE1	Nucleoporin GLE1	19	2117.38	2162.19	2091.83	2112.11	2122.43	2094.16	2055.24	2058.82	2051.96
sp|O60242|AGRB3_HUMAN	ADGRB3	Adhesion G protein-coupled receptor B3	3	194.482	194.823	177.683	180.601	180.463	184.821	164.538	179.502	170.65
sp|P50454|SERPH_HUMAN	SERPINH1	Serpin H1	67	9908.24	9851.26	9902.38	11015.9	10948	10914.3	10359.7	10342.2	10276.7
sp|Q14683|SMC1A_HUMAN	SMC1A	Structural maintenance of chromosomes protein 1A	135	32576.4	32415.6	32263	32144.1	32447.9	32440.7	32768.2	32512.4	32779.9
sp|Q9H8G2|CAAP1_HUMAN	CAAP1	Caspase activity and apoptosis inhibitor 1	15	3069.41	3061.55	3096.38	3174.05	3036.03	3093.83	3008.88	3020.05	2994.64
sp|Q9BX79-4|STRA6_HUMAN	STRA6	Isoform 4 of Receptor for retinol uptake STRA6	16	3847.72	3841.66	3690.46	2987.23	3011.91	2995.4	3408.13	3466.95	3440.72
sp|Q6NSJ5|LRC8E_HUMAN	LRRC8E	Volume-regulated anion channel subunit LRRC8E	10	365.573	365.898	388.791	379.89	388.207	392.392	374.962	380.387	361.405
sp|Q6P9F7|LRC8B_HUMAN	LRRC8B	Volume-regulated anion channel subunit LRRC8B	4	158.324	171.754	158.938	160.518	151.036	142.084	161.571	170.087	153.011
sp|Q7L1W4|LRC8D_HUMAN	LRRC8D	Volume-regulated anion channel subunit LRRC8D	26	1095.29	1089.61	1107.83	1055.57	1084.53	1096.53	1086.75	1143.33	1113.25
sp|Q8IWT6|LRC8A_HUMAN	LRRC8A	Volume-regulated anion channel subunit LRRC8A	28	2773.27	2887.95	2799.44	2946.77	2991.2	2884.41	2878.22	2850.54	2900.15
sp|Q8TDW0|LRC8C_HUMAN	LRRC8C	Volume-regulated anion channel subunit LRRC8C	8	1572.28	1575.79	1591.33	1572.2	1492.74	1515.57	1645.99	1576.28	1631.86
sp|Q99615|DNJC7_HUMAN	DNAJC7	DnaJ homolog subfamily C member 7	42	7584.58	7539.48	7475.57	7908.79	7764.49	7738.37	7402.67	7456.1	7568.16
sp|Q96M96|FGD4_HUMAN	FGD4	FYVE, RhoGEF and PH domain-containing protein 4	3	498.983	526.17	513.375	527.524	519.908	524.295	489.658	514.923	541.828
sp|P53365|ARFP2_HUMAN	ARFIP2	Arfaptin-2	14	1516.51	1569.91	1492.96	1588.36	1545.4	1512.78	1408.81	1402.03	1401.82
sp|P53367|ARFP1_HUMAN	ARFIP1	Arfaptin-1	29	4318.31	4264.19	4213.92	4152.82	4132.33	4085.97	4051.09	3992.42	3972.12
sp|P53367-2|ARFP1_HUMAN	ARFIP1	Isoform A of Arfaptin-1	1	68.1091	76.3523	76.8533	76.2741	82.3574	68.4941	63.8635	67.6002	67.6566
sp|Q53H96|P5CR3_HUMAN	PYCR3	Pyrroline-5-carboxylate reductase 3	12	1826.34	1786.28	1742.02	1644.8	1681.15	1667.7	1777.91	1771.94	1779.39
sp|Q13895|BYST_HUMAN	BYSL	Bystin	44	4306.64	4312.51	4290.32	4201.16	4241.31	4182.33	4301.09	4319.83	4376.95
sp|Q96BY9|SARAF_HUMAN	SARAF	Store-operated calcium entry-associated regulatory factor	2	44.1435	57.9375	42.8862	62.8172	56.8036	69.2143	70.6831	68.4224	75.8311
sp|O95900|TRUB2_HUMAN	TRUB2	Mitochondrial mRNA pseudouridine synthase TRUB2	23	1545	1535.18	1557.12	1412.95	1428.72	1421.92	1434.94	1425.51	1438.17
sp|Q8N9Z2|CC71L_HUMAN	CCDC71L	Coiled-coil domain-containing protein 71L	3	143.249	139.137	136.332	128.766	121.352	123.348	128.375	134.484	122.873
sp|Q96GG9|DCNL1_HUMAN	DCUN1D1	DCN1-like protein 1	18	2917.38	2967.33	2999.16	2974.75	2944.57	2926.17	2938.87	3013.33	3051.46
sp|Q92817|EVPL_HUMAN	EVPL	Envoplakin	6	22.4203	20.9443	19.0733	16.6248	24.5878	16.9635	22.8022	20.3581	21.8332
sp|Q14204|DYHC1_HUMAN	DYNC1H1	Cytoplasmic dynein 1 heavy chain 1	307	49031.5	48615.3	48414.7	48333.3	48531.7	48357.4	49305.4	48924.6	48673.1
sp|Q9BXK5|B2L13_HUMAN	BCL2L13	Bcl-2-like protein 13	20	2490.47	2447.66	2443.24	2346.9	2293.1	2348.78	2367.39	2416	2383.73
sp|Q15436|SC23A_HUMAN	SEC23A	Protein transport protein Sec23A	56	2908.98	2936.65	3131.73	3092.89	3018.31	3053.36	3060.3	3161.08	3176.42
sp|Q15437|SC23B_HUMAN	SEC23B	Protein transport protein Sec23B	76	11432.3	11524.8	11276.3	11348.3	11479.2	11416.2	11894.1	11883.6	11851.2
sp|Q96BP3|PPWD1_HUMAN	PPWD1	Peptidylprolyl isomerase domain and WD repeat-containing protein 1	32	4219.23	4239.5	4286.79	4303.25	4205.77	4209.7	4272.87	4275.18	4270.59
sp|Q9BQ39|DDX50_HUMAN	DDX50	ATP-dependent RNA helicase DDX50	52	8891.18	8973.22	8930.55	8985.53	8956.93	8914.03	8906.34	9112.49	8972.67
sp|Q9NR30|DDX21_HUMAN	DDX21	Nucleolar RNA helicase 2	94	14695.5	14574.3	14620.3	16818.6	16453.2	16636.5	16865.1	16923.5	16881.4
sp|Q5XUX0|FBX31_HUMAN	FBXO31	F-box only protein 31	1	10.7716	20.0973	13.8185	17.811	10.0026	14.5656	14.1384	16.778	12.344
sp|P02649|APOE_HUMAN	APOE	Apolipoprotein E	38	249.447	234.95	374.639	385.055	362.337	347.697	343.84	341.476	362.567
sp|Q7L266|ASGL1_HUMAN	ASRGL1	Isoaspartyl peptidase/L-asparaginase	21	1607.99	1638.62	1659.69	1549.67	1592.78	1594.42	1637.67	1597.2	1615.35
sp|P61927|RL37_HUMAN	RPL37	60S ribosomal protein L37	3	757.008	783.994	775.06	764.478	717.012	763.815	739.195	737.579	745.082
sp|Q86U90|YRDC_HUMAN	YRDC	YrdC domain-containing protein, mitochondrial	11	1112.75	1104.79	1064.23	1172.6	1160.34	1175.39	1082.6	1067.1	1068.21
sp|P07910|HNRPC_HUMAN	HNRNPC	Heterogeneous nuclear ribonucleoproteins C1/C2	18	3338.88	3421.05	3329.63	3403.05	3413.35	3403.74	3308.3	3269	3218.06
sp|P07910-2|HNRPC_HUMAN	HNRNPC	Isoform C1 of Heterogeneous nuclear ribonucleoproteins C1/C2	2	259.219	240.061	243.173	237.115	212.432	224.274	226.712	215.013	219.253
sp|Q9UKM9|RALY_HUMAN	RALY	RNA-binding protein Raly	55	8436.76	8272.07	8243.18	8020.13	8006.24	8050.39	7959.37	7855.56	7798.16
tr|G3V5V7|G3V5V7_HUMAN	HNRNPC	Heterogeneous nuclear ribonucleoproteins C1/C2 (Fragment)	2	131.017	136.233	135.141	135.373	137.63	122.549	127.679	126.4	113.886
sp|P22314|UBA1_HUMAN	UBA1	Ubiquitin-like modifier-activating enzyme 1	129	19558.9	19521.3	19228.8	19690.4	19524.1	19402.2	20285.6	20123	20165
sp|Q9Y3T9|NOC2L_HUMAN	NOC2L	Nucleolar complex protein 2 homolog	53	7168.35	7178.18	7055.11	7137.16	7091.16	7289.81	6815.1	6874.06	6798.94
sp|Q96F86|EDC3_HUMAN	EDC3	Enhancer of mRNA-decapping protein 3	30	3147.26	3166.75	3195.12	2861.75	2961.69	2939.03	2891.29	2878.01	2913.67
sp|P13804|ETFA_HUMAN	ETFA	Electron transfer flavoprotein subunit alpha, mitochondrial	18	2519.21	2483.41	2598.46	2462.32	2482.25	2548.09	2536.99	2439.74	2421.75
sp|Q2TAZ0-3|ATG2A_HUMAN	ATG2A	Isoform 2 of Autophagy-related protein 2 homolog A	13	680.587	676.377	664.136	687.846	683.057	662.959	659.867	696.314	678.138
sp|Q96BY7|ATG2B_HUMAN	ATG2B	Autophagy-related protein 2 homolog B	33	3100.54	3069.24	3005.98	2842.42	2921.6	2872.85	2971.62	3007.61	3074.44
sp|Q13155|AIMP2_HUMAN	AIMP2	Aminoacyl tRNA synthase complex-interacting multifunctional protein 2	35	3639.21	3610.61	3672.31	3626.69	3577	3515.97	3677.86	3662.83	3663.45
sp|P31153|METK2_HUMAN	MAT2A	S-adenosylmethionine synthase isoform type-2	54	8008.68	8010.14	7976.98	7984.45	7933.29	7838.68	7980.23	7855.96	7838.08
sp|Q00266|METK1_HUMAN	MAT1A	S-adenosylmethionine synthase isoform type-1	46	1694.47	1728.84	1809.26	1738.88	1696.32	1728.13	1686.09	1746.06	1752.22
sp|Q8TBN0|R3GEF_HUMAN	RAB3IL1	Guanine nucleotide exchange factor for Rab-3A	6	1152.58	1170.57	1180.29	1144.32	1156.86	1146.8	1147.23	1145.59	1106.79
sp|Q96QF0|RAB3I_HUMAN	RAB3IP	Rab-3A-interacting protein	5	180.209	216.489	204.063	178.268	157.473	204.809	165.711	166.904	176.608
sp|P10809|CH60_HUMAN	HSPD1	60 kDa heat shock protein, mitochondrial	212	16108.6	16005.1	16738.4	17632.1	17416.2	17458.1	16356.7	16599.7	16365.6
sp|Q15814|TBCC_HUMAN	TBCC	Tubulin-specific chaperone C	24	1545.46	1480.51	1562.85	1431.44	1435.67	1519.99	1453.49	1422.82	1426.34
sp|Q14974|IMB1_HUMAN	KPNB1	Importin subunit beta-1	139	20614.2	20515.8	20669.7	20163.4	20310.6	20207.6	21374	20789.3	20991.2
sp|Q99460|PSMD1_HUMAN	PSMD1	26S proteasome non-ATPase regulatory subunit 1	120	16175.5	16336.9	16332.8	16592.6	16680.2	16496.4	16281.9	16293.8	16181.4
sp|Q01844-5|EWS_HUMAN	EWSR1	Isoform 5 of RNA-binding protein EWS	29	5184.52	5092.85	5286.55	5000.76	5025.27	4989.21	5045.6	5083.53	5172.13
tr|H7BY36|H7BY36_HUMAN	EWSR1	RNA-binding protein EWS (Fragment)	3	119.248	110.712	99.5654	85.0734	102.019	97.0267	105.836	98.5659	104.415
sp|O95684|FR1OP_HUMAN	FGFR1OP	FGFR1 oncogene partner	18	2558.7	2511.35	2521.11	2444.21	2458.09	2483.25	2447.94	2429.75	2386.65
sp|Q29RF7|PDS5A_HUMAN	PDS5A	Sister chromatid cohesion protein PDS5 homolog A	76	13370.1	13243.3	13208.3	13293	13247.3	13396.8	13529.8	13411.7	13515.8
sp|Q9NTI5|PDS5B_HUMAN	PDS5B	Sister chromatid cohesion protein PDS5 homolog B	83	14724	14635.7	14599.3	15069.1	15040.4	15110.7	15502.8	15586.8	15332.4
sp|Q9UHI6|DDX20_HUMAN	DDX20	Probable ATP-dependent RNA helicase DDX20	43	6310.91	6264.79	6158.01	6407.22	6286.72	6324.07	6229.11	6214.79	6283.77
sp|Q9BUT1|BDH2_HUMAN	BDH2	3-hydroxybutyrate dehydrogenase type 2	19	2458.18	2551.17	2512.68	2387.09	2407.95	2356.7	2399.15	2396.79	2404.72
sp|Q6ZRI8|RHG36_HUMAN	ARHGAP36	Rho GTPase-activating protein 36	36	6889.34	6879.5	6727.66	5489.28	5627.01	5563.71	6243.34	6336.21	6301.18
sp|Q6P9B9|INT5_HUMAN	INTS5	Integrator complex subunit 5	18	1343.21	1348.54	1280.17	1296.39	1266.32	1284.5	1304.72	1304.92	1351.83
sp|P13716-2|HEM2_HUMAN	ALAD	Isoform 2 of Delta-aminolevulinic acid dehydratase	10	457.983	452.782	484.808	452.713	468.412	448.481	452.121	441.991	479.46
sp|Q13206|DDX10_HUMAN	DDX10	Probable ATP-dependent RNA helicase DDX10	43	4308.04	4384.43	4343.15	4898.37	4882.05	4783.21	4673.28	4758.19	4762.2
sp|Q9Y4E6-2|WDR7_HUMAN	WDR7	Isoform 2 of WD repeat-containing protein 7	29	4179.92	4128.49	4106.86	3895.66	3956.41	3984.92	4084.19	4063.75	4146.86
sp|Q8NB14|UBP38_HUMAN	USP38	Ubiquitin carboxyl-terminal hydrolase 38	10	535.133	570.082	555.908	590.721	585.035	590.437	550.017	556.085	557.078
sp|Q9BZE4|NOG1_HUMAN	GTPBP4	Nucleolar GTP-binding protein 1	77	9179.2	8930.2	9026.27	10099.2	10178.1	10130.7	10015.3	10051.5	9995.2
sp|Q96GX9|MTNB_HUMAN	APIP	Methylthioribulose-1-phosphate dehydratase	20	2542.37	2475.87	2524.4	2499.02	2532.21	2584.2	2467.79	2585.56	2563.87
sp|Q6P2Q9|PRP8_HUMAN	PRPF8	Pre-mRNA-processing-splicing factor 8	199	30044.8	29809.6	29837.6	29978.6	30161.9	29711.4	30368.5	30334.3	30108.2
sp|Q9UKB1-3|FBW1B_HUMAN	FBXW11	Isoform B of F-box/WD repeat-containing protein 11	7	343.453	361.404	345.891	366.775	375.214	367.664	342.228	333.74	348.706
sp|Q9Y297|FBW1A_HUMAN	BTRC	F-box/WD repeat-containing protein 1A	9	558.389	566.749	551.785	592.536	590.172	580.775	577.321	558.937	560.679
sp|P05023|AT1A1_HUMAN	ATP1A1	Sodium/potassium-transporting ATPase subunit alpha-1	80	7091.19	7276.18	7494.43	6997.78	7012.31	7033.48	6886.55	6991.36	6900.93
sp|P13637-3|AT1A3_HUMAN	ATP1A3	Isoform 3 of Sodium/potassium-transporting ATPase subunit alpha-3	44	7872.66	7902.33	7776.5	6975.25	6972.33	7062.81	6884.85	7031.69	7002.14
sp|P54098|DPOG1_HUMAN	POLG	DNA polymerase subunit gamma-1	17	1163.26	1159.48	1142.77	1049.18	1081.73	1015.98	1099.24	1093.61	1109.69
sp|P39060|COIA1_HUMAN	COL18A1	Collagen alpha-1(XVIII) chain	20	191.453	232.391	200.631	175.142	217.041	231.162	215.509	185.326	177.462
sp|Q7L8L6|FAKD5_HUMAN	FASTKD5	FAST kinase domain-containing protein 5, mitochondrial	40	2722.04	2783.7	2856.22	2732.2	2775.38	2681.2	2680.53	2723.1	2700.97
sp|Q8N3C7|CLIP4_HUMAN	CLIP4	CAP-Gly domain-containing linker protein 4	3	521.458	539.6	550.255	478.731	470.693	492.504	518.515	521.506	508.487
sp|Q7L311|ARMX2_HUMAN	ARMCX2	Armadillo repeat-containing X-linked protein 2	12	1228.18	1204.89	1208.4	1148.4	1107.12	1099.33	1049.27	1037.67	1028.37
sp|P06733|ENOA_HUMAN	ENO1	Alpha-enolase	130	14991.4	14838.3	15121.2	15779.5	15824.8	15682.8	15506.7	15366.7	15265.2
sp|P09104|ENOG_HUMAN	ENO2	Gamma-enolase	59	15391.4	15076.7	15072.7	15272	15575.8	15346.4	15687.5	15478.4	15719.3
sp|P13929|ENOB_HUMAN	ENO3	Beta-enolase	54	6623.08	6482.86	6649.24	6835.72	6877.42	6808.74	6621.95	6740.57	6714.15
sp|Q9NQG1|MANBL_HUMAN	MANBAL	Protein MANBAL	2	352.729	391.239	365.116	434.998	451.121	460.57	433.394	411.908	405.012
sp|Q8NEF9|SRFB1_HUMAN	SRFBP1	Serum response factor-binding protein 1	26	4393.15	4294.41	4342.66	4834.58	4840.78	4821.95	4343.02	4240.59	4336.29
sp|Q9UMY1|NOL7_HUMAN	NOL7	Nucleolar protein 7	17	2529.19	2501.03	2546.29	2731.63	2662.71	2778.67	2549.7	2600.56	2647.16
sp|P22033|MUTA_HUMAN	MMUT	Methylmalonyl-CoA mutase, mitochondrial	56	5065.75	5063.75	5155	5406.51	5403.02	5358.42	4982.16	5044.08	5033.2
sp|Q9H9L3|I20L2_HUMAN	ISG20L2	Interferon-stimulated 20 kDa exonuclease-like 2	20	4022.09	3919.48	3934.87	3801.48	3823.76	3868.83	3570.6	3628.93	3658.63
sp|P37059|DHB2_HUMAN	HSD17B2	Estradiol 17-beta-dehydrogenase 2	24	233.911	293.877	391.166	335.784	340.029	313.74	307.597	336.525	328.026
sp|P00390|GSHR_HUMAN	GSR	Glutathione reductase, mitochondrial	58	4198.72	4344.78	4349.83	4428.49	4479.83	4500.05	4445.63	4462.62	4375.53
sp|Q5JTV8|TOIP1_HUMAN	TOR1AIP1	Torsin-1A-interacting protein 1	45	5016.9	5059.33	5087.06	5490.24	5518.38	5449.81	5413.12	5499.34	5533.08
sp|Q8NFQ8|TOIP2_HUMAN	TOR1AIP2	Torsin-1A-interacting protein 2	25	4914.58	4867.02	4859.39	5702	5658.01	5658.11	5351.73	5333.58	5468.91
sp|Q15125|EBP_HUMAN	EBP	3-beta-hydroxysteroid-Delta(8),Delta(7)-isomerase	3	84.6278	83.3368	79.5703	78.8392	73.9785	75.7324	86.4706	80.1324	76.6581
sp|P35611-3|ADDA_HUMAN	ADD1	Isoform 3 of Alpha-adducin	44	6547.82	6609.43	6441.03	6293.91	6438.49	6401.14	6257.89	6303.37	6255.3
sp|P35612|ADDB_HUMAN	ADD2	Beta-adducin	44	12825.6	12544.9	12432.2	11964	11929.1	12014.6	12024.6	12005.4	12093.5
sp|O60294|TYW4_HUMAN	LCMT2	tRNA wybutosine-synthesizing protein 4	16	998.264	1007	991.967	949.04	955.799	922.278	1060.88	1062.51	1031.38
sp|P46100|ATRX_HUMAN	ATRX	Transcriptional regulator ATRX	87	13100.2	13330.8	13067.6	12639.7	12523.5	12705.6	13030.6	13142.3	13008.5
sp|Q8NEY1|NAV1_HUMAN	NAV1	Neuron navigator 1	39	5375.85	5400.35	5253.62	5276.8	5306.37	5192.07	5131.82	5126.56	5176.56
sp|P51659|DHB4_HUMAN	HSD17B4	Peroxisomal multifunctional enzyme type 2	23	3088.52	3102.71	3062.03	3376.16	3317.53	3351.96	3232.91	3181.7	3175.09
sp|P11310-2|ACADM_HUMAN	ACADM	Isoform 2 of Medium-chain specific acyl-CoA dehydrogenase, mitochondrial	45	5989.58	5982.08	5946.86	5985.25	5828.88	5889.95	5967.09	5973.75	5886.85
sp|Q9NUW8|TYDP1_HUMAN	TDP1	Tyrosyl-DNA phosphodiesterase 1	16	1916.49	1990.12	2039.62	1905.15	1894.91	2008.39	2059.48	2056.81	2118.39
sp|P13521|SCG2_HUMAN	SCG2	Secretogranin-2	23	4656.65	4643.35	4573.35	3267.26	3312.65	3324.29	4414.9	4383.35	4404.93
sp|Q9H6K4|OPA3_HUMAN	OPA3	Optic atrophy 3 protein	3	227.441	210.844	234.205	210.849	210.073	224.503	199.603	237.119	226.29
sp|O15068|MCF2L_HUMAN	MCF2L	Guanine nucleotide exchange factor DBS	10	1053.95	1091.43	995.67	1118.34	1074.4	1072.91	1006.49	1050.49	1032.49
sp|O94967|WDR47_HUMAN	WDR47	WD repeat-containing protein 47	1	38.819	40.2518	38.8263	35.7343	34.115	36.7479	33.1766	31.2901	36.7595
sp|O94967-4|WDR47_HUMAN	WDR47	Isoform 4 of WD repeat-containing protein 47	26	2956.03	3002.21	2997.34	2967.02	2989.95	2936.56	2966.25	2977.44	2958.84
sp|P09884|DPOLA_HUMAN	POLA1	DNA polymerase alpha catalytic subunit	51	6746.96	6844.86	6642.99	6609.7	6685.16	6693.65	6837.8	6780.63	6847.89
sp|Q8NBN7|RDH13_HUMAN	RDH13	Retinol dehydrogenase 13	19	1094.53	1115.2	1146.11	994.481	960.881	991.878	1017.39	1020.22	1026.06
sp|O75955|FLOT1_HUMAN	FLOT1	Flotillin-1	31	5063.74	5039.61	4982.75	5117.59	5194.12	5124.4	5193.07	5196.13	5275.01
sp|P51649-2|SSDH_HUMAN	ALDH5A1	Isoform 2 of Succinate-semialdehyde dehydrogenase, mitochondrial	50	2305.96	2363.18	2724.97	2470.61	2415.97	2526.05	2471.5	2515.48	2503.39
sp|P28827-2|PTPRM_HUMAN	PTPRM	Isoform 2 of Receptor-type tyrosine-protein phosphatase mu	3	23.9728	28.8889	26.7804	28.7102	19.4289	23.5253	23.2872	22.2606	17.8982
sp|Q15262-2|PTPRK_HUMAN	PTPRK	Isoform 2 of Receptor-type tyrosine-protein phosphatase kappa	19	163.861	195.263	221.058	199.789	201.776	195.582	184.775	199.752	204.542
sp|P05141|ADT2_HUMAN	SLC25A5	ADP/ATP translocase 2	26	3678.19	3783.8	3784.84	3786.16	3799.67	3812.3	3667.01	3667.23	3567.95
sp|P12235|ADT1_HUMAN	SLC25A4	ADP/ATP translocase 1	12	2406.56	2422.63	2417.22	2156.49	2230.26	2263.22	2262.61	2221.16	2172.3
sp|P12236|ADT3_HUMAN	SLC25A6	ADP/ATP translocase 3	87	16177.4	16383	16610.1	15947.7	15923.9	15907.2	15972.6	15825.7	15654.4
sp|O15541|R113A_HUMAN	RNF113A	E3 ubiquitin-protein ligase RNF113A	12	973.994	973.671	986.276	908.506	917.822	930.042	906.949	882.339	931.163
sp|Q9H0E3-3|SP130_HUMAN	SAP130	Isoform 3 of Histone deacetylase complex subunit SAP130	26	3915.67	3957.85	3940.47	3812.19	3831.33	3781.83	3853.08	3798.01	3871.54
sp|O00186|STXB3_HUMAN	STXBP3	Syntaxin-binding protein 3	46	4574.02	4517.25	4632.75	4879.83	4886.94	4818.55	4593.19	4632.68	4514.67
sp|P49821|NDUV1_HUMAN	NDUFV1	NADH dehydrogenase [ubiquinone] flavoprotein 1, mitochondrial	14	1677.38	1673.82	1728.46	1400.96	1362.46	1382.43	1552.8	1547.82	1549.09
tr|E9PJL9|E9PJL9_HUMAN	NDUFV1	NADH dehydrogenase [ubiquinone] flavoprotein 1, mitochondrial (Fragment)	1	38.8463	36.8439	41.2817	29.6385	29.3799	28.5608	38.6586	39.4273	41.1992
sp|Q12873-3|CHD3_HUMAN	CHD3	Isoform 3 of Chromodomain-helicase-DNA-binding protein 3	37	5874.64	5843.49	5902.44	5704.4	5762.13	5718.55	5955.72	5951.41	5953.69
sp|Q14839-2|CHD4_HUMAN	CHD4	Isoform 2 of Chromodomain-helicase-DNA-binding protein 4	29	3269.68	3289.03	3274.35	3259.96	3289.38	3283.54	3410.93	3385.72	3416.41
tr|A0A2R8Y521|A0A2R8Y521_HUMAN	CHD4	Chromodomain-helicase-DNA-binding protein 4	2	36.8861	33.3733	35.5302	28.399	36.286	32.8054	27.5969	25.7878	28.4558
tr|A0A2R8Y5M9|A0A2R8Y5M9_HUMAN	CHD4	Chromodomain-helicase-DNA-binding protein 4 (Fragment)	1	24.9164	25.138	22.7911	27.0118	20.9491	20.008	23.9821	25.8004	19.9883
sp|Q8N163|CCAR2_HUMAN	CCAR2	Cell cycle and apoptosis regulator protein 2	111	12387.8	12122.6	12088.2	11848.2	11865.9	11927.8	12061.6	12059.1	12008.9
tr|G3V119|G3V119_HUMAN	CCAR2	Cell cycle and apoptosis regulator protein 2	2	193.501	190.834	204.24	161.859	148.756	162.752	166.217	145.067	168.702
sp|P22695|QCR2_HUMAN	UQCRC2	Cytochrome b-c1 complex subunit 2, mitochondrial	57	5665.55	5712.46	5788.04	5813.79	5858.59	5693.55	5685.11	5660.78	5680.91
sp|Q9C0B1|FTO_HUMAN	FTO	Alpha-ketoglutarate-dependent dioxygenase FTO	18	2398.38	2389.86	2351.32	2367.83	2309.56	2290.76	2343.33	2379.89	2385.28
sp|P54136|SYRC_HUMAN	RARS	Arginine--tRNA ligase, cytoplasmic	118	17792	17411.6	17611.6	18083.6	18056.8	17949.3	18054.3	17916.4	18098.3
sp|Q8NCS7|CTL5_HUMAN	SLC44A5	Choline transporter-like protein 5	2	426.717	431.455	412.455	346.678	369.898	373.007	409.972	412.059	406.777
sp|Q96N16|JKIP1_HUMAN	JAKMIP1	Janus kinase and microtubule-interacting protein 1	16	2722.25	2720.26	2692.12	2507.42	2510.81	2571.25	2560.24	2632.97	2604.44
sp|O60551|NMT2_HUMAN	NMT2	Glycylpeptide N-tetradecanoyltransferase 2	26	1925.63	1913.01	1885.99	1873.02	1849.83	1897.93	1943.72	1943.03	1961.74
sp|P30419|NMT1_HUMAN	NMT1	Glycylpeptide N-tetradecanoyltransferase 1	46	4142.32	4154.44	4204.28	4211.06	4101.3	4154.06	4158.2	4156.42	4196.12
sp|Q8IYK4|GT252_HUMAN	COLGALT2	Procollagen galactosyltransferase 2	10	256.874	244.069	259.456	286.957	281.868	272.565	289.671	307.413	301.189
sp|Q8NBJ5|GT251_HUMAN	COLGALT1	Procollagen galactosyltransferase 1	50	4406.06	4403.32	4518.36	4902.63	4873.22	4914.93	4955.66	4940.82	4921
sp|P51784|UBP11_HUMAN	USP11	Ubiquitin carboxyl-terminal hydrolase 11	59	5743.85	5659.8	5608.18	5455.83	5364.17	5455.73	5458.24	5494.61	5425.09
sp|Q13107|UBP4_HUMAN	USP4	Ubiquitin carboxyl-terminal hydrolase 4	35	2590.77	2656.69	2591.07	2544.11	2535.25	2474.6	2599.47	2605.22	2576.53
sp|Q9Y4E8|UBP15_HUMAN	USP15	Ubiquitin carboxyl-terminal hydrolase 15	57	6444.78	6518.39	6461.37	6344.43	6320.02	6471.14	6459.19	6357.58	6437.9
sp|O94830|DDHD2_HUMAN	DDHD2	Phospholipase DDHD2	19	2303.85	2325.92	2231.46	2099.83	2204.06	2133.03	2214.6	2257.59	2251.67
sp|Q9Y6Y8|S23IP_HUMAN	SEC23IP	SEC23-interacting protein	70	7223.36	7247.54	7229.7	7362.31	7160.33	7158.35	7197.64	7246.47	7150.7
sp|P11940|PABP1_HUMAN	PABPC1	Polyadenylate-binding protein 1	16	3285.16	3190.72	3154.36	3424.82	3454.42	3386.56	3255.8	3209.34	3145.37
sp|Q13310-3|PABP4_HUMAN	PABPC4	Isoform 3 of Polyadenylate-binding protein 4	50	9792.94	9830.47	9663.08	9940.2	10073.6	9870.35	9742.99	9595.31	9603.24
tr|H0YAR2|H0YAR2_HUMAN	PABPC1	Polyadenylate-binding protein 1 (Fragment)	5	297.375	317.322	324.839	324.595	293.547	315.038	288.367	317.274	291.456
sp|P17980|PRS6A_HUMAN	PSMC3	26S proteasome regulatory subunit 6A	68	8093.73	7987.13	7801.97	7969.6	7814.76	7973.76	8058.68	7774.21	7929.38
tr|E9PM69|E9PM69_HUMAN	PSMC3	26S proteasome regulatory subunit 6A	2	31.9698	36.872	31.928	37.7329	31.0039	34.0617	29.5141	35.0713	33.1179
sp|O95155-4|UBE4B_HUMAN	UBE4B	Isoform 4 of Ubiquitin conjugation factor E4 B	54	5098.48	5195.65	5199.7	4932.72	4958.58	4996.79	5150.12	5154.66	5127.99
sp|Q9NWB6|ARGL1_HUMAN	ARGLU1	Arginine and glutamate-rich protein 1	12	2491.19	2506.23	2547.84	2398.65	2413.78	2416.59	2366.07	2350.06	2343.24
sp|P62873|GBB1_HUMAN	GNB1	Guanine nucleotide-binding protein G(I)/G(S)/G(T) subunit beta-1	18	1787.75	1797.21	1805.09	1711.35	1724.22	1803.95	1732.21	1708.14	1714.22
sp|P62879|GBB2_HUMAN	GNB2	Guanine nucleotide-binding protein G(I)/G(S)/G(T) subunit beta-2	34	3771.5	3816.93	3746.71	3934.69	3919.21	3947.71	3812.28	3769.11	3791.83
sp|Q9HAV0|GBB4_HUMAN	GNB4	Guanine nucleotide-binding protein subunit beta-4	7	1861.8	1910.01	1924.61	1986.75	1989.02	1976.81	1962	1964.32	1969.35
sp|Q8TF05|PP4R1_HUMAN	PPP4R1	Serine/threonine-protein phosphatase 4 regulatory subunit 1	28	1648.94	1602.32	1654.38	1568.37	1616.72	1595.09	1595.28	1625.99	1613.52
sp|Q5T4S7-2|UBR4_HUMAN	UBR4	Isoform 2 of E3 ubiquitin-protein ligase UBR4	169	22405.8	22435.8	22162.1	21961.5	21654.4	21723.2	22051.1	22196.3	22126.1
sp|Q96QK1|VPS35_HUMAN	VPS35	Vacuolar protein sorting-associated protein 35	86	11189.9	11410.5	11483.8	11323.2	11426.4	11462.4	11573.6	11491.3	11552.2
tr|A0A1W2PP10|A0A1W2PP10_HUMAN	VPS35	Vacuolar protein sorting-associated protein 35	2	723.317	608.61	712.807	801.004	701.164	640.43	773.534	742.414	737.694
sp|Q6AI08|HEAT6_HUMAN	HEATR6	HEAT repeat-containing protein 6	29	4150.94	4228.04	4118.14	3952.05	3932.48	3857.85	4170.18	4143.57	4171.29
sp|O95825|QORL1_HUMAN	CRYZL1	Quinone oxidoreductase-like protein 1	7	1335.29	1320.85	1349.22	1344.23	1353.48	1328.92	1371.21	1398.24	1374.96
sp|P00558|PGK1_HUMAN	PGK1	Phosphoglycerate kinase 1	128	20876.3	20938.1	20910.2	21102.9	21030.9	21109.8	21188.3	21289.7	21083.5
sp|P07205|PGK2_HUMAN	PGK2	Phosphoglycerate kinase 2	5	360.813	357.288	353.334	342.754	329.5	332.505	350.609	364.155	365.812
sp|Q9UFC0|LRWD1_HUMAN	LRWD1	Leucine-rich repeat and WD repeat-containing protein 1	46	5034.37	5058.28	4962.62	5078.74	4990.03	5001.67	5074.29	5133.33	5067.01
sp|Q96AY4|TTC28_HUMAN	TTC28	Tetratricopeptide repeat protein 28	71	6349.24	6432.27	6229.71	6112.33	5934.1	6135.99	6253.75	6200.79	6346.89
sp|P55040|GEM_HUMAN	GEM	GTP-binding protein GEM	2	711.398	690.977	705.634	716.312	717.703	692.5	658.306	689.6	697.178
sp|P55042|RAD_HUMAN	RRAD	GTP-binding protein RAD	3	547.946	524.626	532.913	617.844	639.114	600.49	513.451	512.162	516.025
sp|O75382|TRIM3_HUMAN	TRIM3	Tripartite motif-containing protein 3	16	1304.21	1317.48	1276.66	1280.53	1266.39	1280.32	1254.19	1310.47	1301.3
sp|Q9C040-2|TRIM2_HUMAN	TRIM2	Isoform 2 of Tripartite motif-containing protein 2	39	8796.42	8892.52	8731.04	8592.86	8654.69	8647.15	8649.68	8699.07	8804.71
sp|P26440|IVD_HUMAN	IVD	Isovaleryl-CoA dehydrogenase, mitochondrial	22	3334.4	3329.7	3570.15	3354.12	3342.99	3415.34	3318.34	3291.5	3366.64
sp|O00469-2|PLOD2_HUMAN	PLOD2	Isoform 2 of Procollagen-lysine,2-oxoglutarate 5-dioxygenase 2	51	361.271	354.436	554.061	508.619	439.168	504.317	484.796	502.902	519.762
sp|Q9UJV9|DDX41_HUMAN	DDX41	Probable ATP-dependent RNA helicase DDX41	54	9004.26	9194.42	9095.46	8947.85	9100.94	8945.28	9042.55	9041.1	9004.92
sp|P48449|ERG7_HUMAN	LSS	Lanosterol synthase	68	4012	4025.31	4153.06	4026.16	4018.18	3984.12	4159.39	4151.94	4196.29
sp|P05156|CFAI_HUMAN	CFI	Complement factor I	23	191.458	169.957	259.088	271.877	255.663	253.396	264.526	244.4	258.196
sp|Q9Y5A7|NUB1_HUMAN	NUB1	NEDD8 ultimate buster 1	24	3470.82	3466.24	3422.77	3336.65	3377.23	3378.79	3410.22	3431.78	3342.37
sp|Q96BR5|COA7_HUMAN	COA7	Cytochrome c oxidase assembly factor 7	27	1996.81	1977.94	2045.85	1886.6	1892.25	1869.99	1943.25	1910.93	1917.94
sp|Q8NFM7|I17RD_HUMAN	IL17RD	Interleukin-17 receptor D	2	536.215	545.276	546.785	486.83	499.598	479.515	506.57	501.731	499.721
sp|P42575|CASP2_HUMAN	CASP2	Caspase-2	20	3213.49	3181.11	3266.3	2761.02	2827.06	2838.37	3042.8	3062.26	3076.84
sp|Q86WX3|AROS_HUMAN	RPS19BP1	Active regulator of SIRT1	8	1074.3	1071.64	1113.02	1218.32	1227.64	1245.76	1169.38	1182.29	1214.34
sp|P04035-3|HMDH_HUMAN	HMGCR	Isoform 3 of 3-hydroxy-3-methylglutaryl-coenzyme A reductase	16	269.014	282.013	295.282	578.461	561.668	544.859	399.829	361.907	378.407
sp|Q96T76-8|MMS19_HUMAN	MMS19	Isoform 5 of MMS19 nucleotide excision repair protein homolog	65	5729.53	5859.36	5849.86	5622.77	5670	5752.06	6178.86	6085.23	6150.77
sp|Q9BUB4|ADAT1_HUMAN	ADAT1	tRNA-specific adenosine deaminase 1	5	271.253	260.329	268.945	261.729	234.041	235.606	264.211	269.472	262.116
sp|P22415|USF1_HUMAN	USF1	Upstream stimulatory factor 1	9	1301.17	1325.42	1309.19	1259.78	1198.72	1278.31	1209.61	1250.61	1244.84
sp|Q15853|USF2_HUMAN	USF2	Upstream stimulatory factor 2	6	1816.98	1758.2	1707.32	1725.38	1720.98	1751.85	1663.44	1654.09	1642.34
sp|Q6IPU0|CENPP_HUMAN	CENPP	Centromere protein P	9	813.937	786.748	795.959	703.82	759.987	723.842	685.866	691.69	754.708
sp|Q5W0V3|F16B1_HUMAN	FAM160B1	Protein FAM160B1	28	3565.63	3565.2	3635.56	3496.02	3547.17	3497.69	3631.86	3571.02	3565.21
sp|Q86V87|F16B2_HUMAN	FAM160B2	Protein FAM160B2	8	613.434	637.631	647.593	632.098	613.718	639.544	643.051	672.185	650.67
sp|Q9NY97|B3GN2_HUMAN	B3GNT2	N-acetyllactosaminide beta-1,3-N-acetylglucosaminyltransferase 2	4	119.144	132.302	117.513	134.148	132.87	136.621	124.642	121.47	127.228
sp|Q9Y2K7|KDM2A_HUMAN	KDM2A	Lysine-specific demethylase 2A	38	3447.59	3486.09	3509.51	3733.4	3717.67	3747.23	3637.14	3648.74	3736.17
sp|Q8IWY9|CDAN1_HUMAN	CDAN1	Codanin-1	12	257.31	241.556	253.504	252.181	255.745	267.095	264.143	261.707	268.776
sp|Q5R3I4|TTC38_HUMAN	TTC38	Tetratricopeptide repeat protein 38	33	829.422	831.599	961.946	857.281	888.666	926.433	909.583	897.932	900.652
sp|Q14201-2|BTG3_HUMAN	BTG3	Isoform 2 of Protein BTG3	2	355.068	359.326	334.344	376.354	368.347	352.674	351.61	340.907	351.229
sp|O95568|MET18_HUMAN	METTL18	Histidine protein methyltransferase 1 homolog	3	335.377	326.477	344.683	336.334	325.329	349.879	328.214	347.516	356.947
sp|P01024|CO3_HUMAN	C3	Complement C3	105	1124.66	1138.85	1591.85	1560.18	1593.97	1513.72	1496.69	1514.21	1527.77
sp|Q8WXI4-2|ACO11_HUMAN	ACOT11	Isoform 2 of Acyl-coenzyme A thioesterase 11	4	261.011	280.796	255.578	267.299	247.756	247.789	262.871	267.997	268.599
sp|Q9Y2G5|OFUT2_HUMAN	POFUT2	GDP-fucose protein O-fucosyltransferase 2	30	2464.95	2593.14	2662.32	2646.51	2604.05	2597.65	2671.2	2724.89	2724.13
sp|O94776|MTA2_HUMAN	MTA2	Metastasis-associated protein MTA2	50	7401.34	7391.31	7347.57	7845.82	7828.71	7803.45	7634.99	7758.29	7607.61
sp|Q13330-3|MTA1_HUMAN	MTA1	Isoform 3 of Metastasis-associated protein MTA1	59	9637.55	9545.79	9580.94	9800.42	9849.96	9799.65	9862.11	9771.74	9840.56
sp|Q9BTC8|MTA3_HUMAN	MTA3	Metastasis-associated protein MTA3	17	2584.01	2576.64	2563.75	2556.33	2550.65	2582.77	2626.56	2638.58	2723.54
tr|E7EV10|E7EV10_HUMAN	MTA3	Metastasis-associated protein MTA3	1	7.47839	9.08124	4.78109	7.73417	6.52091	7.72625	4.93951	8.42214	7.39521
sp|Q9P2N4|ATS9_HUMAN	ADAMTS9	A disintegrin and metalloproteinase with thrombospondin motifs 9	14	2548.71	2460.08	2427.24	2235.84	2260.51	2258.27	2392.28	2403.9	2425.88
sp|O43739|CYH3_HUMAN	CYTH3	Cytohesin-3	2	116.036	123.886	105.712	114.808	113.645	110.697	115.085	117.606	111.978
sp|Q15438|CYH1_HUMAN	CYTH1	Cytohesin-1	9	1120.38	1068.47	1039.09	1094.04	1091.59	1080.39	1052.17	1125.58	1067.74
sp|Q99418|CYH2_HUMAN	CYTH2	Cytohesin-2	5	457.762	436.581	450.148	445.75	437.267	431.409	423.087	433.654	439.152
sp|Q9Y6D5|BIG2_HUMAN	ARFGEF2	Brefeldin A-inhibited guanine nucleotide-exchange protein 2	44	2787.33	2809.93	2909.22	2977.11	2875.72	2930.17	2925.36	2907.91	2864.34
sp|Q9Y6D6|BIG1_HUMAN	ARFGEF1	Brefeldin A-inhibited guanine nucleotide-exchange protein 1	53	6318.47	6367.08	6427.58	6047.48	6135.75	6246.52	6314.58	6432.01	6436.72
sp|Q9Y3S2|ZN330_HUMAN	ZNF330	Zinc finger protein 330	15	2638.95	2617.79	2612.74	2667.39	2617.98	2685.16	2521.82	2527.53	2567.75
sp|Q6PD62|CTR9_HUMAN	CTR9	RNA polymerase-associated protein CTR9 homolog	64	11391.4	11440.9	11294.7	11684.2	11601.8	11567.5	11561.4	11629.8	11804.3
sp|Q8N6H7|ARFG2_HUMAN	ARFGAP2	ADP-ribosylation factor GTPase-activating protein 2	17	1058.98	1117.6	1067.86	1028.77	985.108	1054.17	1067.03	1026.71	1044.67
sp|Q9NP61|ARFG3_HUMAN	ARFGAP3	ADP-ribosylation factor GTPase-activating protein 3	13	908.783	921.443	915.507	1012.98	1001.8	1025.15	878.493	902.996	951.809
sp|Q8NF91|SYNE1_HUMAN	SYNE1	Nesprin-1	31	2545.92	2589.53	2509.67	2527.11	2539.2	2540.5	2545.71	2532.29	2626.73
sp|Q8WXH0-2|SYNE2_HUMAN	SYNE2	Isoform 2 of Nesprin-2	212	34413.3	34143.7	33714.3	33881.5	34149.7	34080.9	35761.3	35653.2	36096.4
sp|Q9BVP2|GNL3_HUMAN	GNL3	Guanine nucleotide-binding protein-like 3	45	5033.99	5089.17	5161.17	5296.32	5208.03	5320.58	5198.26	5107.69	5081.23
sp|Q9NVN8|GNL3L_HUMAN	GNL3L	Guanine nucleotide-binding protein-like 3-like protein	25	2780.5	2861.83	2805.15	2850.07	2866.97	2868.61	2658.11	2730.02	2827.44
sp|Q86V15|CASZ1_HUMAN	CASZ1	Zinc finger protein castor homolog 1	4	318.408	327.317	330.151	316.595	312.374	299.006	350.384	339.525	324.236
sp|Q9NR09|BIRC6_HUMAN	BIRC6	Baculoviral IAP repeat-containing protein 6	103	13523.5	13579.9	13602.9	13275	13164.9	13178.9	13574.8	13473.3	13513.6
tr|A0A3B3IUB9|A0A3B3IUB9_HUMAN	BIRC6	Baculoviral IAP repeat-containing protein 6 (Fragment)	4	146.407	134.171	140.208	137.453	120.948	127.405	119.562	128.154	122.659
sp|Q14847|LASP1_HUMAN	LASP1	LIM and SH3 domain protein 1	30	3500.94	3513.45	3702.69	3715.79	3702.92	3739.24	3538.68	3438.25	3530.77
sp|O14787|TNPO2_HUMAN	TNPO2	Transportin-2	49	3904.4	3907.86	3830.02	3716.7	3657.2	3657.43	3843.35	3793.22	3779.27
sp|Q92973|TNPO1_HUMAN	TNPO1	Transportin-1	97	10250.3	10110.3	10074.4	10247.3	10280.8	10369	10292.3	10467.1	10168.5
sp|Q9H9P8|L2HDH_HUMAN	L2HGDH	L-2-hydroxyglutarate dehydrogenase, mitochondrial	24	2868.16	2934.87	2883.31	2806.82	2783.6	2830.85	2765.42	2793.59	2862.91
sp|Q12816|TROP_HUMAN	TRO	Trophinin	1	38.3703	31.2781	37.133	35.9849	37.5732	28.3815	23.4647	33.1089	36.2328
sp|Q96JG8-4|MAGD4_HUMAN	MAGED4	Isoform 4 of Melanoma-associated antigen D4	8	315.658	336.399	375.387	359.016	360.218	353.438	314.913	314.15	326.434
sp|Q9UNF1|MAGD2_HUMAN	MAGED2	Melanoma-associated antigen D2	41	10400.8	10397.8	10165.8	11066.8	11035.6	11166.6	10813.8	10886.6	10943.3
sp|Q9Y5V3-2|MAGD1_HUMAN	MAGED1	Isoform 2 of Melanoma-associated antigen D1	28	3693.26	3678.58	3702.1	3774.74	3791.15	3760.93	3599.56	3581.66	3559.09
sp|P10643|CO7_HUMAN	C7	Complement component C7	53	9441.89	9477.63	9226.31	12999.5	13048.3	12962.7	11038.7	11024	11272.1
sp|O14686-3|KMT2D_HUMAN	KMT2D	Isoform 3 of Histone-lysine N-methyltransferase 2D	31	1450.4	1427.57	1420.79	1396.63	1384.23	1394.4	1397.73	1377.61	1375.61
sp|P50583|AP4A_HUMAN	NUDT2	Bis(5'-nucleosyl)-tetraphosphatase [asymmetrical]	13	885.534	857.178	866.354	804.763	822.043	775.264	843.96	831.896	816.904
sp|Q96RG2|PASK_HUMAN	PASK	PAS domain-containing serine/threonine-protein kinase	23	1502.37	1538.3	1541.35	1526.1	1527.22	1565.77	1476.8	1513.23	1502.33
sp|Q99536|VAT1_HUMAN	VAT1	Synaptic vesicle membrane protein VAT-1 homolog	44	6205.72	6305.21	6267.71	6536.47	6492.9	6492.76	6363.6	6415.95	6349.33
sp|Q9HCJ6|VAT1L_HUMAN	VAT1L	Synaptic vesicle membrane protein VAT-1 homolog-like	10	1482.32	1428.63	1412.87	1428.34	1473.39	1409.45	1365.45	1424.45	1396.58
sp|Q969K3-2|RNF34_HUMAN	RNF34	Isoform 2 of E3 ubiquitin-protein ligase RNF34	3	223.157	211.269	222.692	209.897	243.428	201.947	226.408	210.22	220.835
sp|P22234-2|PUR6_HUMAN	PAICS	Isoform 2 of Multifunctional protein ADE2	98	9147.07	9086.12	9180.29	9194.54	9144.7	9184.21	9209.38	9151.17	9113.9
tr|D6RF62|D6RF62_HUMAN	PAICS	Multifunctional protein ADE2	4	382.793	344.941	362.949	390.061	368.011	372.592	359.359	338.44	334.306
sp|Q9HBF4|ZFYV1_HUMAN	ZFYVE1	Zinc finger FYVE domain-containing protein 1	27	3851.74	3771.15	3685.03	3870.9	3853.78	3798.33	3651.16	3745.29	3639.49
sp|O14964|HGS_HUMAN	HGS	Hepatocyte growth factor-regulated tyrosine kinase substrate	47	7516.2	7574.46	7450.19	7310.36	7298.4	7215.81	7038.13	7145.71	6996.58
sp|P49407-2|ARRB1_HUMAN	ARRB1	Isoform 1B of Beta-arrestin-1	36	2087.69	2118.58	2188.89	2023.25	2028.12	2029.59	2048.75	2070.29	2044.71
sp|O43156|TTI1_HUMAN	TTI1	TELO2-interacting protein 1 homolog	26	2461.73	2514.06	2475.83	2414.74	2343	2370.3	2434.25	2478.84	2480.28
sp|Q14644|RASA3_HUMAN	RASA3	Ras GTPase-activating protein 3	7	385.897	412.886	412.246	411.589	402.388	416.533	402.984	409.248	406.176
sp|Q15283|RASA2_HUMAN	RASA2	Ras GTPase-activating protein 2	23	2046.86	2135.27	2085.43	2046.87	2118.17	2077.64	2087.42	2104.62	2111.28
sp|O95185|UNC5C_HUMAN	UNC5C	Netrin receptor UNC5C	15	1887.83	1917.84	1819.15	1785.99	1754.96	1811.66	1712.19	1779.22	1807.89
sp|Q8IZJ1|UNC5B_HUMAN	UNC5B	Netrin receptor UNC5B	15	1309.45	1317.62	1290.66	1487.71	1550.69	1528.42	1354.45	1344.07	1379.67
sp|Q9C0C7-5|AMRA1_HUMAN	AMBRA1	Isoform 5 of Activating molecule in BECN1-regulated autophagy protein 1	10	516.435	528.481	530.186	526.154	519.127	526.342	503.741	515.568	519.428
sp|Q9BU64|CENPO_HUMAN	CENPO	Centromere protein O	3	452.132	460.174	437.433	429.003	391.137	430.503	403.281	413.17	420.175
sp|P29144|TPP2_HUMAN	TPP2	Tripeptidyl-peptidase 2	105	15534.3	15262.2	15286.2	15414.4	15643.8	15347.1	15847	15470.3	15619.7
sp|Q8NBX0|SCPDL_HUMAN	SCCPDH	Saccharopine dehydrogenase-like oxidoreductase	20	1768.38	1800.65	1793.83	1829.08	1846.06	1812.57	1807.17	1775.41	1799.6
sp|A0AVT1|UBA6_HUMAN	UBA6	Ubiquitin-like modifier-activating enzyme 6	95	15756.5	15615.1	15685.5	15514.1	15343.4	15338.8	15922.3	15891.9	15755.1
sp|Q14690|RRP5_HUMAN	PDCD11	Protein RRP5 homolog	122	15275.1	15359.4	15538.3	15993.2	16236.8	15956.9	16429.1	16352.2	16505.3
sp|Q6YN16|HSDL2_HUMAN	HSDL2	Hydroxysteroid dehydrogenase-like protein 2	43	3113.35	3173.43	3371.12	3277.47	3189.96	3170.44	3159.71	3205.66	3118.84
sp|P53801|PTTG_HUMAN	PTTG1IP	Pituitary tumor-transforming gene 1 protein-interacting protein	4	407.425	388.298	424.291	595.642	561.691	588.937	411.564	392.272	415.713
sp|Q93063-3|EXT2_HUMAN	EXT2	Isoform 3 of Exostosin-2	21	1036.51	1119.6	1097.67	1177.99	1178.92	1161.8	1152.93	1173.54	1140.72
sp|Q96HD1-2|CREL1_HUMAN	CRELD1	Isoform 2 of Protein disulfide isomerase CRELD1	18	1649.4	1685.17	1691.68	1877.17	1749.75	1857.28	1828.43	1868.2	1860.28
sp|P35998|PRS7_HUMAN	PSMC2	26S proteasome regulatory subunit 7	71	10628.2	10541.1	10570.1	10596.7	10723.9	10701.8	10655	10544.7	10503.3
sp|P43686|PRS6B_HUMAN	PSMC4	26S proteasome regulatory subunit 6B	49	8677	8502.37	8661.65	8495.25	8707.63	8521.39	8701.46	8596.87	8715.94
sp|P62191|PRS4_HUMAN	PSMC1	26S proteasome regulatory subunit 4	79	11372.3	11340.2	11373.1	11570.6	11443.4	11445.8	11344.1	11291.2	11326.1
sp|P62195|PRS8_HUMAN	PSMC5	26S proteasome regulatory subunit 8	49	7248	7203.58	7211.24	7277.72	7357.55	7208.19	7185.13	7224.94	7109.11
sp|Q8NB90|AFG2H_HUMAN	SPATA5	ATPase family protein 2 homolog	51	8016.33	7924.04	7895.19	7855.71	7901.94	7910.54	7799.16	7813.61	7758.46
tr|G3V4X1|G3V4X1_HUMAN	PSMC1	26S proteasome regulatory subunit 4 (Fragment)	1	106.092	118.44	129.885	106.539	112.433	105.895	147.693	143.638	154.146
sp|P63272|SPT4H_HUMAN	SUPT4H1	Transcription elongation factor SPT4	13	1283.54	1173.21	1170.6	1309.55	1303.41	1210.17	1173	1162.23	1130.09
sp|Q8WUA2|PPIL4_HUMAN	PPIL4	Peptidyl-prolyl cis-trans isomerase-like 4	34	3734.43	3719.98	3786.92	3673.55	3618.07	3676.29	3513.45	3634.25	3600.62
sp|Q9BZF3-5|OSBL6_HUMAN	OSBPL6	Isoform 5 of Oxysterol-binding protein-related protein 6	11	605.231	617.42	559.907	605.763	584.386	594.637	574.258	586.334	556.222
sp|Q86Y56|DAAF5_HUMAN	DNAAF5	Dynein assembly factor 5, axonemal	48	3881.18	4087.24	4050.39	4215.69	4202.34	4176.91	4276.66	4261.36	4284.1
sp|P42356|PI4KA_HUMAN	PI4KA	Phosphatidylinositol 4-kinase alpha	49	3760.69	3711.36	3799.21	3366.78	3426.83	3422.88	3662.11	3644.98	3684.29
tr|A0A5F9ZI63|A0A5F9ZI63_HUMAN	EED	Polycomb protein EED	27	3536.61	3492.54	3493.19	3396.52	3408.78	3465.98	3437.68	3463.37	3459.49
sp|Q9BZH6|WDR11_HUMAN	WDR11	WD repeat-containing protein 11	54	4784.04	4745.55	4773.3	4510.63	4607.92	4659.66	4751.67	4694.15	4683
sp|P15104|GLNA_HUMAN	GLUL	Glutamine synthetase	26	1471.46	1483.4	1529.44	1535.47	1484.14	1466.87	1558.74	1528.25	1526.37
sp|A7E2V4-4|ZSWM8_HUMAN	ZSWIM8	Isoform 4 of Zinc finger SWIM domain-containing protein 8	11	1061.12	1106.61	1070.39	999.105	1036.61	1065.07	1065.51	1093.56	1088.41
sp|Q9BW27|NUP85_HUMAN	NUP85	Nuclear pore complex protein Nup85	36	4339.17	4288.18	4274.83	4213.12	4221.65	4340.18	4276.46	4362.18	4335.34
sp|Q9BQ67|GRWD1_HUMAN	GRWD1	Glutamate-rich WD repeat-containing protein 1	39	4800.93	4831.34	4789.26	4640.24	4579.36	4679.56	4513.96	4449.71	4557.22
sp|Q8IZL8|PELP1_HUMAN	PELP1	Proline-, glutamic acid- and leucine-rich protein 1	48	3997.77	4134.43	4051.26	3929.03	3912.89	3921.93	4106.28	4120.32	4051.25
sp|P11047|LAMC1_HUMAN	LAMC1	Laminin subunit gamma-1	76	3514.5	3563.7	3782.01	4276.1	4180.04	4152.43	4176.04	4188.06	4050.54
sp|Q96EK2|PF21B_HUMAN	PHF21B	PHD finger protein 21B	3	659.672	712.687	686.823	619.391	606.568	629.903	671.604	655.62	663.602
sp|Q13772-4|NCOA4_HUMAN	NCOA4	Isoform 4 of Nuclear receptor coactivator 4	14	315.11	313.725	350.286	358.283	328.134	356.377	311.043	334.465	317.374
sp|Q9H8J5|MANS1_HUMAN	MANSC1	MANSC domain-containing protein 1	4	159.344	160.675	145.531	52.9055	54.1596	55.4962	102.09	126.782	110.123
sp|Q96SW2|CRBN_HUMAN	CRBN	Protein cereblon	15	698.834	727.175	724.201	714.66	703.411	671.985	692.356	693.963	702.741
sp|Q15652|JHD2C_HUMAN	JMJD1C	Probable JmjC domain-containing histone demethylation protein 2C	39	4961.02	5023.08	5056.81	5110.1	5088.76	5072.41	5070.12	5045.9	4996.2
sp|Q7LBC6|KDM3B_HUMAN	KDM3B	Lysine-specific demethylase 3B	69	11160.1	11132.1	11064.7	11060.1	11067.9	11009.4	10889.4	10867.4	10854.5
sp|Q9Y4C1|KDM3A_HUMAN	KDM3A	Lysine-specific demethylase 3A	43	2898.51	2899.5	2994.02	3126.1	3067.5	3145.35	2971.63	2995.45	2955.14
sp|Q96JS3|PGBD1_HUMAN	PGBD1	PiggyBac transposable element-derived protein 1	2	25.875	24.5984	20.3646	19.3328	17.9555	16.8314	22.6455	21.4843	25.3757
sp|Q8NHP8|PLBL2_HUMAN	PLBD2	Putative phospholipase B-like 2	16	2656.59	2664.78	2662.39	2610.19	2624.68	2590.23	2686.62	2694.22	2708.6
sp|O60658|PDE8A_HUMAN	PDE8A	High affinity cAMP-specific and IBMX-insensitive 3',5'-cyclic phosphodiesterase 8A	9	434.578	486.688	450.705	399.183	430.955	424.173	437.977	497.083	462.562
sp|Q9UGR2|Z3H7B_HUMAN	ZC3H7B	Zinc finger CCCH domain-containing protein 7B	36	2720.34	2700.78	2801.69	2707.77	2817.46	2822.19	2682.99	2714.08	2711.87
sp|Q53EU6|GPAT3_HUMAN	GPAT3	Glycerol-3-phosphate acyltransferase 3	1	19.0053	14.5297	23.382	19.6902	18.1898	23.1468	23.9199	23.1475	25.3853
sp|Q86UL3|GPAT4_HUMAN	GPAT4	Glycerol-3-phosphate acyltransferase 4	10	2053.19	2047.95	2034.88	2355.19	2301.34	2322.66	2168.02	2256.13	2272.17
sp|Q15004|PAF15_HUMAN	PCLAF	PCNA-associated factor	12	2245.7	2257.15	2248.8	2245.66	2217.78	2269.22	2023.4	2099.28	2100.87
sp|P11717|MPRI_HUMAN	IGF2R	Cation-independent mannose-6-phosphate receptor	139	15015.8	15114	15418.8	17591.6	17395.9	17435.9	16032	16297.3	16182.1
sp|P15927-3|RFA2_HUMAN	RPA2	Isoform 3 of Replication protein A 32 kDa subunit	35	3143.72	3095.23	3080.93	3029.07	3080.25	3089.36	3109.76	3010.63	3015.09
sp|O94822-3|LTN1_HUMAN	LTN1	Isoform 3 of E3 ubiquitin-protein ligase listerin	59	6803.6	6836.53	6745.32	6881.73	6910.16	6836	7019.99	6997	6929.3
sp|Q8IXH7|NELFD_HUMAN	NELFCD	Negative elongation factor C/D	37	4943.48	4971.66	4911.09	4632.71	4812.41	4786.11	4935.4	4984.28	4913.77
sp|Q8N9F7|GDPD1_HUMAN	GDPD1	Lysophospholipase D GDPD1	14	1818.31	1831.83	1810.05	1935.79	1942.17	1925.2	1869.43	1868.98	1858.86
sp|P24385|CCND1_HUMAN	CCND1	G1/S-specific cyclin-D1	12	844.173	871.861	798.678	929.668	967.107	923.248	773.584	802.651	788.55
sp|P26358|DNMT1_HUMAN	DNMT1	DNA (cytosine-5)-methyltransferase 1	3	339.073	310.123	305.01	359.264	350.606	387.967	364.842	388.925	389.117
sp|P26358-2|DNMT1_HUMAN	DNMT1	Isoform 2 of DNA (cytosine-5)-methyltransferase 1	88	11755.9	11891.4	11831	13121.2	13084.7	13075.1	13225.6	13205.8	13055.5
sp|Q9BXS4|TMM59_HUMAN	TMEM59	Transmembrane protein 59	11	276.887	256.362	277.147	311.01	301.818	312.478	230.405	247.46	251.257
sp|Q9UKL6|PPCT_HUMAN	PCTP	Phosphatidylcholine transfer protein	11	398.763	410.884	436.626	434.324	438.06	444.303	361.743	390.605	363.3
sp|P61247|RS3A_HUMAN	RPS3A	40S ribosomal protein S3a	34	5733.9	5778.39	5627.03	6226.47	6192.76	6285.04	5934.64	5879.45	5875.74
sp|Q9P2D3|HTR5B_HUMAN	HEATR5B	HEAT repeat-containing protein 5B	67	6261.87	6297.9	6323.23	6149.92	6147.69	6096.34	6381.5	6363.67	6372.35
sp|Q6ZRQ5|MMS22_HUMAN	MMS22L	Protein MMS22-like	24	3079.74	3109.23	3030.41	2911.59	2920.85	2957.88	3078.07	3056.5	3062.47
sp|Q14919-2|NC2A_HUMAN	DRAP1	Isoform 2 of Dr1-associated corepressor	12	1138.34	1182.11	1151.81	1126.09	1075.39	1071.5	1130.93	1107.34	1114.56
sp|P12882|MYH1_HUMAN	MYH1	Myosin-1	8	514.975	512.98	559.125	565.265	594.414	585.956	83.2243	80.6662	89.3236
sp|P13533|MYH6_HUMAN	MYH6	Myosin-6	3	80.7152	85.6544	81.432	80.525	99.5138	92.4157	15.1182	16.2519	21.2477
sp|P35579|MYH9_HUMAN	MYH9	Myosin-9	157	30882.5	30723.2	30462.1	30312.3	30513.3	30412.5	30650	30461	30526
sp|P35580-3|MYH10_HUMAN	MYH10	Isoform 3 of Myosin-10	2	231.327	230.607	221.84	210.283	200.491	209.233	205.059	195.855	201.124
sp|P35580-4|MYH10_HUMAN	MYH10	Isoform 4 of Myosin-10	211	40169.1	39984	39622.8	39344	39424.4	39561.6	39577.8	39742.7	39477.6
sp|Q13439|GOGA4_HUMAN	GOLGA4	Golgin subfamily A member 4	4	116.248	123.342	117.354	127.051	121.489	127.514	116.481	118.117	117.944
sp|Q13439-5|GOGA4_HUMAN	GOLGA4	Isoform 5 of Golgin subfamily A member 4	108	11729.8	11891.6	12020.9	12565.6	12526.5	12324.6	11985.5	12053.2	12142.9
sp|Q7Z406-6|MYH14_HUMAN	MYH14	Isoform 6 of Myosin-14	69	2566.97	2502.1	2580.5	2539.04	2552.35	2556.41	2619.17	2643.14	2637.41
sp|Q9UKX3|MYH13_HUMAN	MYH13	Myosin-13	1	177.4	151.166	169.194	238.1	238.086	220.778	10.6777	6.54667	6.12271
sp|Q9Y623|MYH4_HUMAN	MYH4	Myosin-4	4	120.223	118.551	136.411	138.135	148.16	143.212	14.6282	15.6962	18.2967
sp|Q6N075-2|MFSD5_HUMAN	MFSD5	Isoform 2 of Molybdate-anion transporter	6	393.742	381.873	389.592	402.872	408.5	378.207	370.924	396.124	399.063
sp|P23677|IP3KA_HUMAN	ITPKA	Inositol-trisphosphate 3-kinase A	23	1011.28	1023.28	1100.26	989.261	944.681	972.2	1025.91	1012.16	1012.46
sp|P27987|IP3KB_HUMAN	ITPKB	Inositol-trisphosphate 3-kinase B	5	308.699	286.59	284.985	287.061	268.478	286.736	290.041	300.335	276.887
sp|Q96DU7|IP3KC_HUMAN	ITPKC	Inositol-trisphosphate 3-kinase C	8	415.414	411.376	427.254	374.675	391.103	377.565	386.202	379.35	403.615
sp|Q13796|SHRM2_HUMAN	SHROOM2	Protein Shroom2	5	768.473	731.394	742.84	697.799	762.714	716.684	651.817	613.356	655.724
sp|Q8TF72|SHRM3_HUMAN	SHROOM3	Protein Shroom3	13	1213.65	1226.92	1193.13	1105.71	1090.2	1075.16	1082.7	1061.05	1055.73
sp|Q99797|MIPEP_HUMAN	MIPEP	Mitochondrial intermediate peptidase	37	3115.5	3119.11	3174.47	3068.96	3056.23	3045.44	3019.68	3015	2945.98
sp|Q9HBU6|EKI1_HUMAN	ETNK1	Ethanolamine kinase 1	12	1124.94	1079.92	1122.16	1077.25	1091.24	1106.23	1033.53	1096.74	1068.9
sp|Q9NVF9-2|EKI2_HUMAN	ETNK2	Isoform 2 of Ethanolamine kinase 2	1	59.3371	65.5201	56.8506	52.8661	61.351	53.0457	53.2475	50.0161	62.1086
sp|Q16854|DGUOK_HUMAN	DGUOK	Deoxyguanosine kinase, mitochondrial	16	1539.57	1483.88	1370.92	1317.28	1284.43	1367.56	1298.76	1296.13	1326.56
sp|P49368|TCPG_HUMAN	CCT3	T-complex protein 1 subunit gamma	104	13975.3	13911.7	13785	14220.4	14357.3	14179.8	14113.9	13954.8	13831.7
sp|Q16878|CDO1_HUMAN	CDO1	Cysteine dioxygenase type 1	1	14.7459	11.6798	20.5248	17.0083	9.85276	13.5719	18.4797	12.4887	13.7303
sp|Q15043|S39AE_HUMAN	SLC39A14	Zinc transporter ZIP14	21	757.57	801.938	867.181	938.792	967.619	952.965	890.918	903.489	889.302
sp|Q16514|TAF12_HUMAN	TAF12	Transcription initiation factor TFIID subunit 12	4	1145.49	1177.35	1137.09	1135.83	1093.01	1128.37	1086.91	1100	1094.03
sp|P49915|GUAA_HUMAN	GMPS	GMP synthase [glutamine-hydrolyzing]	80	9761.44	9670.17	9639.42	9585.63	9526.84	9537.53	9719.6	9770.78	9884.04
sp|A6NHR9|SMHD1_HUMAN	SMCHD1	Structural maintenance of chromosomes flexible hinge domain-containing protein 1	135	18778.9	18813.6	18677.1	18029.7	17938.2	18038.4	18634.1	18833.8	18781.3
sp|O15067|PUR4_HUMAN	PFAS	Phosphoribosylformylglycinamidine synthase	95	14913.8	14874.4	14770.7	14523.3	14480.8	14369.4	15136	15136.1	15056.9
tr|J3KTL4|J3KTL4_HUMAN	PFAS	Phosphoribosylformylglycinamidine synthase (Fragment)	1	107.679	116.751	117.614	90.8827	99.7809	106.106	118.772	110.264	114.705
sp|Q8TB61-3|S35B2_HUMAN	SLC35B2	Isoform 3 of Adenosine 3'-phospho 5'-phosphosulfate transporter 1	31	2951.49	3063.55	2946.67	3462.6	3471.83	3479.14	3052.55	3033.4	3037.22
sp|Q9NPH2|INO1_HUMAN	ISYNA1	Inositol-3-phosphate synthase 1	32	5551.12	5509.25	5376.63	5096.47	4995.26	5072.49	5388.12	5340.64	5455.97
sp|Q9BW19|KIFC1_HUMAN	KIFC1	Kinesin-like protein KIFC1	32	4706.06	4732.35	4628.06	4624.52	4567.23	4548.27	4552.69	4522.72	4566.23
sp|O95544|NADK_HUMAN	NADK	NAD kinase	10	690.397	691.554	724.372	665.284	653.956	661.058	673.302	707.24	687.657
sp|P00491|PNPH_HUMAN	PNP	Purine nucleoside phosphorylase	61	3491.46	3475.06	3669.64	3575.51	3511.78	3534.66	3635.08	3689.29	3555.85
sp|O95248-4|MTMR5_HUMAN	SBF1	Isoform 4 of Myotubularin-related protein 5	44	4314.38	4389.49	4222.99	4358.99	4300.38	4304.11	4393.23	4478.92	4488.52
sp|Q86WG5|MTMRD_HUMAN	SBF2	Myotubularin-related protein 13	22	1662.32	1600.7	1663.2	1661.16	1659.93	1741.19	1564.81	1684.51	1621.6
sp|Q9BWS9-2|CHID1_HUMAN	CHID1	Isoform 2 of Chitinase domain-containing protein 1	16	2511.91	2581.6	2548.68	2704.19	2701.37	2702.93	2702.22	2748.09	2708.67
sp|Q6PIJ6-2|FBX38_HUMAN	FBXO38	Isoform 2 of F-box only protein 38	30	1668.15	1706.29	1709.12	1738.37	1695.6	1706.55	1666.84	1756.48	1667.82
sp|P81274|GPSM2_HUMAN	GPSM2	G-protein-signaling modulator 2	5	554.144	558.246	547.222	538.963	551.977	536.435	531.917	527.875	514.346
sp|Q86YR5|GPSM1_HUMAN	GPSM1	G-protein-signaling modulator 1	24	1460.1	1471.49	1423.09	1348.82	1311.33	1337.06	1298.65	1321.66	1306.45
sp|O15397|IPO8_HUMAN	IPO8	Importin-8	32	4070.66	4043.31	4010.39	3931.84	3937.31	3851.98	4124.77	4053.53	4044.2
sp|O95373|IPO7_HUMAN	IPO7	Importin-7	80	10902.6	10800.6	10834.3	10563.7	10748.6	10639.6	11136.1	10964.7	11019.2
sp|P23396|RS3_HUMAN	RPS3	40S ribosomal protein S3	103	14652.4	14566.9	14781.2	15143.9	15159.2	15170.2	15470.3	15429.6	15224.7
tr|E9PJN9|E9PJN9_HUMAN	RPS3	40S ribosomal protein S3 (Fragment)	1	75.6259	76.1167	75.2639	68.6025	71.5734	76.4783	79.9096	79.4169	74.2499
sp|P42025|ACTY_HUMAN	ACTR1B	Beta-centractin	19	990.098	1003.25	1044.79	947.277	955.039	946.101	1007.53	1045.29	1019.77
sp|P61163|ACTZ_HUMAN	ACTR1A	Alpha-centractin	44	15613.7	15510.5	15388.8	14751.6	15069	15091	15794.1	15719.3	15790.2
sp|Q9Y6D9|MD1L1_HUMAN	MAD1L1	Mitotic spindle assembly checkpoint protein MAD1	53	8887.87	8986.49	8872.09	8819.22	8698.49	8744.32	8659.11	8740.7	8812.97
tr|C9JKI7|C9JKI7_HUMAN	MAD1L1	Mitotic spindle assembly checkpoint protein MAD1 (Fragment)	1	39.4273	30.5306	35.0766	26.8206	32.6131	37.344	32.6916	32.8151	37.1881
sp|P22681|CBL_HUMAN	CBL	E3 ubiquitin-protein ligase CBL	27	3272.24	3192.01	3192.09	3370.59	3339.04	3332.29	3252.28	3258.14	3263.49
sp|Q13191|CBLB_HUMAN	CBLB	E3 ubiquitin-protein ligase CBL-B	8	769.146	731.528	751.028	831.184	784.147	819.146	773.766	749.715	782.51
sp|Q9H8Y8-3|GORS2_HUMAN	GORASP2	Isoform 3 of Golgi reassembly-stacking protein 2	36	2781.45	2796.9	2821.02	2912.45	2918.96	2803.69	2939.23	2958.2	2919.63
sp|Q96ES7|SGF29_HUMAN	SGF29	SAGA-associated factor 29	15	1554.97	1550.61	1515.51	1413.74	1426.85	1402.1	1451.91	1494.39	1497.2
sp|O75477|ERLN1_HUMAN	ERLIN1	Erlin-1	38	3257.81	3253.09	3353.83	3720.66	3633.45	3750.03	3684	3680.69	3679.58
sp|O94905|ERLN2_HUMAN	ERLIN2	Erlin-2	22	2941.8	2988.15	3014.45	3287.96	3233.88	3234.96	3198.98	3150.71	3114.31
sp|Q13409-2|DC1I2_HUMAN	DYNC1I2	Isoform 2B of Cytoplasmic dynein 1 intermediate chain 2	36	4538.88	4591.93	4527.43	4534.68	4555.32	4544.05	4484.73	4434.6	4295.8
sp|P52298|NCBP2_HUMAN	NCBP2	Nuclear cap-binding protein subunit 2	14	2829.06	2854.12	2752.36	2729.62	2808.59	2715.78	2827.86	2858.3	2793.58
sp|Q9H8V3-3|ECT2_HUMAN	ECT2	Isoform 3 of Protein ECT2	27	4030.88	3985.08	3985.85	4292.2	4288.56	4194.62	4015.38	4099.37	4113.16
sp|Q96IW2|SHD_HUMAN	SHD	SH2 domain-containing adapter protein D	14	3803.9	3783.06	3691.51	3339.25	3530.62	3485.94	3479.78	3509.25	3498.82
sp|Q13424|SNTA1_HUMAN	SNTA1	Alpha-1-syntrophin	4	219.744	215.632	205.048	182.077	200.665	206.536	196.738	206.927	216.121
sp|Q13425|SNTB2_HUMAN	SNTB2	Beta-2-syntrophin	32	1685.31	1697.89	1731.94	1771.9	1673.55	1730.39	1741.29	1727.9	1731.63
sp|Q13884|SNTB1_HUMAN	SNTB1	Beta-1-syntrophin	40	553.571	521.52	733.612	740.574	625.885	671.782	602.694	636.754	471.593
sp|Q9HBZ2|ARNT2_HUMAN	ARNT2	Aryl hydrocarbon receptor nuclear translocator 2	2	94.5928	103.671	88.3325	82.8522	87.5833	89.661	86.4516	83.7634	83.6542
sp|P20929-3|NEBU_HUMAN	NEB	Isoform 3 of Nebulin	2	17.883	21.5764	21.3091	22.2375	17.3274	21.2147	16.2501	18.9618	15.9907
sp|P42892|ECE1_HUMAN	ECE1	Endothelin-converting enzyme 1	23	1553.91	1622.09	1604.18	1635.91	1611.26	1605.44	1484.49	1515.89	1490.56
sp|P63027|VAMP2_HUMAN	VAMP2	Vesicle-associated membrane protein 2	5	781.323	796.699	773.592	787.685	792.767	787.908	792.909	789.102	811.713
sp|Q15836|VAMP3_HUMAN	VAMP3	Vesicle-associated membrane protein 3	3	237.294	234.159	207.264	227.278	214.954	236.944	214.727	212.035	205.064
sp|Q6NYC1-3|JMJD6_HUMAN	JMJD6	Isoform 3 of Bifunctional arginine demethylase and lysyl-hydroxylase JMJD6	22	1322.65	1281.62	1329.75	1348.43	1367.99	1330.11	1331.14	1318.65	1331.34
sp|Q8TBM8|DJB14_HUMAN	DNAJB14	DnaJ homolog subfamily B member 14	12	1550.22	1546.05	1617.2	1802.86	1819.41	1758.09	1536.51	1549.9	1588.15
sp|O75792|RNH2A_HUMAN	RNASEH2A	Ribonuclease H2 subunit A	24	4387.58	4379.94	4329.45	3965.97	4027.1	3929.93	4140.87	4191.5	4146.65
sp|Q8NC60|NOA1_HUMAN	NOA1	Nitric oxide-associated protein 1	43	3649.64	3637.15	3657.42	3398.42	3418.69	3465.11	3464.65	3488.74	3467.11
sp|Q9BQ52|RNZ2_HUMAN	ELAC2	Zinc phosphodiesterase ELAC protein 2	57	7983.61	7956.05	7954.06	7547.57	7550.86	7600.82	7632.17	7764.89	7805.45
sp|O95433|AHSA1_HUMAN	AHSA1	Activator of 90 kDa heat shock protein ATPase homolog 1	69	10271.4	10265.9	10181.4	10409	10319.1	10397.2	10176.4	10121.6	9986.25
sp|Q5T3U5|MRP7_HUMAN	ABCC10	Multidrug resistance-associated protein 7	6	150.544	145.528	148.52	132.356	134.181	130.609	154.651	152.394	155.397
sp|P49411|EFTU_HUMAN	TUFM	Elongation factor Tu, mitochondrial	106	13099.8	13106.9	13253.4	13054	13132.7	12970.1	12686.4	12739.3	12709.4
sp|P42704|LPPRC_HUMAN	LRPPRC	Leucine-rich PPR motif-containing protein, mitochondrial	213	24384.4	24577.1	24930.3	25100.4	24711.2	25058.9	24674.8	24616.2	24428.6
sp|Q9NP80|PLPL8_HUMAN	PNPLA8	Calcium-independent phospholipase A2-gamma	18	2642.22	2695.39	2663.33	2533.2	2539.72	2521.77	2617.75	2594.99	2657.63
sp|Q8IVL6|P3H3_HUMAN	P3H3	Prolyl 3-hydroxylase 3	29	2442.57	2463.52	2516.61	2633.4	2573.99	2650.41	2692.42	2729.8	2713.66
sp|Q92585|MAML1_HUMAN	MAML1	Mastermind-like protein 1	2	102.66	91.8706	87.381	107.076	100.213	98.5013	78.1218	86.1805	86.0183
sp|Q8IY37|DHX37_HUMAN	DHX37	Probable ATP-dependent RNA helicase DHX37	50	4435.02	4438.08	4379.78	4572.74	4507.25	4539.85	4524.93	4511.66	4472.3
sp|P46063|RECQ1_HUMAN	RECQL	ATP-dependent DNA helicase Q1	58	7306.87	7394.04	7371.73	7549.75	7599.74	7437.42	7564.54	7500.87	7520.8
sp|P54132|BLM_HUMAN	BLM	Bloom syndrome protein	35	4264.62	4291.86	4315.38	4508.34	4465.11	4478.55	4257.18	4245.07	4277.03
sp|Q14571|ITPR2_HUMAN	ITPR2	Inositol 1,4,5-trisphosphate receptor type 2	82	2925.17	2956.43	3240.51	3492.29	3527.68	3427.44	3500.2	3482.92	3575.45
sp|Q14573|ITPR3_HUMAN	ITPR3	Inositol 1,4,5-trisphosphate receptor type 3	23	318.802	339.492	359.753	400.469	369.548	382.434	386.563	389.724	375.183
sp|Q14643|ITPR1_HUMAN	ITPR1	Inositol 1,4,5-trisphosphate receptor type 1	14	1714.08	1710.65	1709.7	1953.96	1939.18	1946.76	1903.63	1824.02	1856.61
sp|Q14141|SEPT6_HUMAN	SEPTIN6	Septin-6	34	7234.13	7330.73	7182.42	7275.91	7460.18	7353.41	7139.8	7119.88	7122.69
sp|Q16181|SEPT7_HUMAN	SEPTIN7	Septin-7	70	12099.3	11960.4	11901.5	12103.2	12244.5	12285.5	11947.4	11870.4	11986.1
sp|Q92599|SEPT8_HUMAN	SEPTIN8	Septin-8	17	3480.19	3353.71	3394.24	3394.71	3490.93	3417.29	3544.09	3444.41	3391.02
sp|Q99719|SEPT5_HUMAN	SEPTIN5	Septin-5	19	4833.09	4807.42	4716.17	4724.56	4892.57	4746.73	4775.18	4803.51	4914.04
sp|Q9NVA2-2|SEP11_HUMAN	SEPTIN11	Isoform 2 of Septin-11	16	3561.11	3562.99	3474.85	3536.9	3511.44	3625.48	3441.34	3491.08	3429.57
sp|Q9P0V9-2|SEP10_HUMAN	SEPTIN10	Isoform 2 of Septin-10	24	3020.39	3019.37	2982.68	2968.3	2896.02	2917.43	2940.93	2969.22	2923.73
sp|Q9UH03|SEPT3_HUMAN	SEPTIN3	Neuronal-specific septin-3	6	947.089	875.36	874.797	849.197	832.914	846.299	841.118	825.076	790.487
sp|Q9UHD8|SEPT9_HUMAN	SEPTIN9	Septin-9	69	11592.1	11491.3	11346.5	12037.9	11902.6	11859.6	11306.2	11235.5	11158.8
sp|P61604|CH10_HUMAN	HSPE1	10 kDa heat shock protein, mitochondrial	53	6118.79	6178.22	6313.04	6590.52	6588.97	6435.53	6157.87	6343.44	6127.88
sp|Q9Y3A3|PHOCN_HUMAN	MOB4	MOB-like protein phocein	21	2610.94	2660.39	2694.02	2690.41	2631.5	2674.29	2651.83	2718.85	2679.61
sp|P22307|NLTP_HUMAN	SCP2	Non-specific lipid-transfer protein	69	8673.47	8558.14	8655.7	8978.55	9109.8	9047.53	8697.9	8684.94	8636.87
sp|O75147|OBSL1_HUMAN	OBSL1	Obscurin-like protein 1	37	2667.67	2780.9	2735.58	2883.79	2954.58	2840.09	2804.98	2788.36	2775.63
sp|Q9NS00|C1GLT_HUMAN	C1GALT1	Glycoprotein-N-acetylgalactosamine 3-beta-galactosyltransferase 1	20	866.84	888.548	940.648	957.128	933.359	971.732	912.395	895.685	857.608
sp|Q5VWQ0|RSBN1_HUMAN	RSBN1	Lysine-specific demethylase 9	24	1750.11	1706.26	1669.47	1694.09	1705.99	1672.07	1665.35	1697.07	1666.97
sp|Q9H6R4|NOL6_HUMAN	NOL6	Nucleolar protein 6	35	4823.91	4931.91	4910.41	4951.92	5046.9	4959.51	4915.83	4961.62	4931.53
sp|P10646|TFPI1_HUMAN	TFPI	Tissue factor pathway inhibitor	12	43.3317	40.6332	61.6859	54.5686	47.0638	47.1059	51.6865	53.3595	44.1434
sp|P10646-2|TFPI1_HUMAN	TFPI	Isoform Beta of Tissue factor pathway inhibitor	1	0	3.21434	5.68884	12.4041	5.67685	8.93822	9.46451	6.30662	8.58853
sp|Q13137-4|CACO2_HUMAN	CALCOCO2	Isoform 4 of Calcium-binding and coiled-coil domain-containing protein 2	11	711.57	759.744	751.761	684.491	684.434	679.055	688.185	708.283	710.092
sp|Q08AH3|ACS2A_HUMAN	ACSM2A	Acyl-coenzyme A synthetase ACSM2A, mitochondrial	1	0.390484	0.217741	0	0	4.5336	0	0	3.44752	0
sp|Q68CK6|ACS2B_HUMAN	ACSM2B	Acyl-coenzyme A synthetase ACSM2B, mitochondrial	12	240.334	219.957	276.465	295.51	279.041	290.876	267.99	281.85	260.88
sp|Q9H9E3|COG4_HUMAN	COG4	Conserved oligomeric Golgi complex subunit 4	39	3639.72	3643.14	3726.27	3722.2	3734.33	3723.07	3720.59	3709.25	3672.84
sp|P46734-3|MP2K3_HUMAN	MAP2K3	Isoform 2 of Dual specificity mitogen-activated protein kinase kinase 3	22	1506.63	1538	1590.56	1443.88	1483.62	1514.84	1504.47	1535.69	1498.3
sp|P52564|MP2K6_HUMAN	MAP2K6	Dual specificity mitogen-activated protein kinase kinase 6	26	5318.75	5299.47	5247.33	5024.17	5067.88	5056.11	5397.04	5455.67	5384.2
sp|O43290|SNUT1_HUMAN	SART1	U4/U6.U5 tri-snRNP-associated protein 1	47	8794.59	8626.98	8708.78	8544.12	8610.21	8532.17	8098.27	8155.07	8174.11
sp|Q96HA7|TONSL_HUMAN	TONSL	Tonsoku-like protein	19	2093.22	2187.27	2145.39	2100.83	2048.16	2069.57	2168.27	2148.85	2188.14
sp|Q96C86|DCPS_HUMAN	DCPS	m7GpppX diphosphatase	24	4095.71	3975.06	3990.86	3774.65	3828.46	3765.41	3886.96	3905.24	3904.73
sp|P35716|SOX11_HUMAN	SOX11	Transcription factor SOX-11	4	1326.67	1313.01	1288.23	1199.59	1198.06	1217.63	1144.4	1171.55	1192.79
sp|Q06945|SOX4_HUMAN	SOX4	Transcription factor SOX-4	5	759.738	780.985	762.854	730.194	714.214	717.663	632.44	620.157	632.174
sp|Q15370|ELOB_HUMAN	ELOB	Elongin-B	16	3027.31	3093.68	2992.51	2933.1	2932.37	2908.65	3074.5	3085.74	3079.33
sp|Q9Y2W2|WBP11_HUMAN	WBP11	WW domain-binding protein 11	42	8178.94	8076.99	8068.85	8037.65	8045.75	7873.76	7633.65	7493.59	7582.63
sp|P61421|VA0D1_HUMAN	ATP6V0D1	V-type proton ATPase subunit d 1	31	3219.69	3173.75	3133.64	3155.78	3113.82	3190.65	3202.21	3149.28	3194.56
sp|Q9Y3Z3|SAMH1_HUMAN	SAMHD1	Deoxynucleoside triphosphate triphosphohydrolase SAMHD1	40	3815.42	3879.34	4032.79	3988.51	3984.55	3942.99	4027.26	3834.89	3988.97
sp|P11498|PYC_HUMAN	PC	Pyruvate carboxylase, mitochondrial	70	6707.18	6840.01	6965.84	6688.47	6598.34	6654.18	6830.74	6850.34	6876.9
sp|P48739-3|PIPNB_HUMAN	PITPNB	Isoform 3 of Phosphatidylinositol transfer protein beta isoform	53	10051.7	10028.9	9887.65	9615.84	9718.83	9698.84	9986.13	10006.8	9861.65
sp|Q00169|PIPNA_HUMAN	PITPNA	Phosphatidylinositol transfer protein alpha isoform	19	2935.9	2904.27	2878.34	2690.82	2672.77	2680.96	2834.34	2869.27	2827.33
sp|P61970|NTF2_HUMAN	NUTF2	Nuclear transport factor 2	32	1846.24	1881.54	1884.15	1543.35	1527.5	1535.45	1586.29	1549.82	1622.39
sp|P32119|PRDX2_HUMAN	PRDX2	Peroxiredoxin-2	75	10845.3	11069.9	10860	10466.4	10387.6	10492.9	11065.7	11136.3	11188.6
sp|Q06830|PRDX1_HUMAN	PRDX1	Peroxiredoxin-1	102	10869.9	10841.2	11100.5	11349.5	11352.5	11420.1	11014.6	11030.2	11005.5
sp|Q13162|PRDX4_HUMAN	PRDX4	Peroxiredoxin-4	45	4482.39	4611.1	4633.38	5289.08	5087.04	5084.64	4948.06	5032.93	4937.57
sp|O14529|CUX2_HUMAN	CUX2	Homeobox protein cut-like 2	2	206.016	207.709	206.315	165.992	160.272	167.348	184.125	193.916	181.776
sp|P39880-3|CUX1_HUMAN	CUX1	Isoform 3 of Homeobox protein cut-like 1	78	17725.5	17729.6	17643.2	17162.7	17132.8	17397.9	17418.6	17444.7	17489.6
sp|Q13948-2|CASP_HUMAN	CUX1	Isoform 8 of Protein CASP	6	454.549	430.153	424.941	422.853	398.389	409.276	415.61	443.598	427.118
sp|Q149N8|SHPRH_HUMAN	SHPRH	E3 ubiquitin-protein ligase SHPRH	18	1975.14	2021.24	1959.41	1930.98	2021.58	1942.15	1964.47	1990.83	2000.38
sp|P11532|DMD_HUMAN	DMD	Dystrophin	4	117.038	100.925	118.148	112.348	108.525	106.614	121.707	93.668	91.2187
sp|P11532-15|DMD_HUMAN	DMD	Isoform 9 of Dystrophin	4	8.84808	8.59933	10.4576	2.80184	7.2722	9.22519	5.01958	5.96166	8.37537
sp|P46939|UTRO_HUMAN	UTRN	Utrophin	147	1133.61	1116.23	1817.72	1819.36	1743.78	1697.3	1648.22	1646.08	1626.16
sp|Q9H257|CARD9_HUMAN	CARD9	Caspase recruitment domain-containing protein 9	20	2247.64	2312.37	2285.97	2001.96	1959.08	1973.61	2152.89	2162.29	2186.74
sp|Q9BYP7|WNK3_HUMAN	WNK3	Serine/threonine-protein kinase WNK3	8	487.485	478.516	488.857	481.313	451.098	477.406	440.903	473.212	465.015
sp|Q9H4A3-7|WNK1_HUMAN	WNK1	Isoform 6 of Serine/threonine-protein kinase WNK1	51	6152.27	6230.08	6216.83	5825.38	5868.77	5874.55	5696.48	5729.71	5705.59
sp|Q9Y3S1|WNK2_HUMAN	WNK2	Serine/threonine-protein kinase WNK2	10	583.881	569.056	606.219	563.781	556.562	545.821	519.757	543.008	550.046
sp|P25786-2|PSA1_HUMAN	PSMA1	Isoform Long of Proteasome subunit alpha type-1	61	8673.97	8697.5	8908.01	9581.55	9440.14	9407.18	8961.67	8819.34	8751.99
sp|P05060|SCG1_HUMAN	CHGB	Secretogranin-1	18	4362.33	4402.48	4430.37	2745.65	2728.73	2771.3	3429.5	3338.07	3365.56
sp|P53396|ACLY_HUMAN	ACLY	ATP-citrate synthase	161	13992.4	14281.2	14410.1	14950.8	14840.4	14872.4	14599.3	14633.4	14469.5
sp|Q92766-2|RREB1_HUMAN	RREB1	Isoform 2 of Ras-responsive element-binding protein 1	24	632.632	674.237	733.125	679.315	683.647	664.303	635.346	650.79	673.919
sp|Q5THK1|PR14L_HUMAN	PRR14L	Protein PRR14L	14	934.346	911.914	911.607	883.466	887.255	847.281	895.496	837.495	869.057
sp|Q9BWN1|PRR14_HUMAN	PRR14	Proline-rich protein 14	3	152.628	142.419	139.829	135.179	138.553	145.56	151.987	149.391	163.489
sp|P14868|SYDC_HUMAN	DARS	Aspartate--tRNA ligase, cytoplasmic	119	12870.9	12919.8	12736.7	12761.5	12743.7	12759.8	12970.6	12932.9	12813.6
sp|Q92791|SC65_HUMAN	P3H4	Endoplasmic reticulum protein SC65	23	1638.74	1568.27	1565.5	1834.75	1833.9	1785.84	1730.15	1757.8	1725.56
sp|Q13017|RHG05_HUMAN	ARHGAP5	Rho GTPase-activating protein 5	38	3182.02	3293.28	3293.4	3415.91	3393.58	3429.77	3401.31	3423.78	3416.98
sp|O60488|ACSL4_HUMAN	ACSL4	Long-chain-fatty-acid--CoA ligase 4	85	1329.71	1379.51	1763.23	1899.4	1828.03	1850.98	1706.65	1743.86	1673.71
sp|O95573|ACSL3_HUMAN	ACSL3	Long-chain-fatty-acid--CoA ligase 3	80	2700.09	2773.31	2984.43	3232.91	3233.47	3186.17	3131.63	3120.29	3121.4
tr|D6RD96|D6RD96_HUMAN	ACSL4	Long-chain-fatty-acid--CoA ligase 4 (Fragment)	3	31.712	43.2041	53.7436	46.1402	49.8343	43.4628	51.4653	46.092	55.825
sp|Q8TAQ2|SMRC2_HUMAN	SMARCC2	SWI/SNF complex subunit SMARCC2	90	21113.8	21037.6	20918.4	20654.7	20971.7	20671.2	20764	20998.9	21094
sp|Q8TAQ2-3|SMRC2_HUMAN	SMARCC2	Isoform 3 of SWI/SNF complex subunit SMARCC2	8	413.382	429.283	440.398	418.323	424.614	439.327	415.093	417.865	414.573
sp|Q92922|SMRC1_HUMAN	SMARCC1	SWI/SNF complex subunit SMARCC1	65	10858.1	10679.1	10648.3	10668.6	10670.9	10553.9	10376.6	10448.1	10457.5
sp|Q9UL12|SARDH_HUMAN	SARDH	Sarcosine dehydrogenase, mitochondrial	41	1219.57	1267.38	1370.03	1238.5	1200.48	1233.74	1304.74	1299.99	1283.35
sp|Q10570|CPSF1_HUMAN	CPSF1	Cleavage and polyadenylation specificity factor subunit 1	63	5055.06	5069.35	5095.23	5089.62	5011.81	5025.42	4999.99	5073.12	5082.81
sp|Q9NZ09-4|UBAP1_HUMAN	UBAP1	Isoform 4 of Ubiquitin-associated protein 1	19	2402.81	2411.23	2419.73	2427.71	2409.27	2380.2	2314.94	2344.57	2353.34
sp|Q96Q15|SMG1_HUMAN	SMG1	Serine/threonine-protein kinase SMG1	61	3531.64	3666.51	3754.99	3545.36	3531.66	3547.98	3725.3	3744.27	3752.33
sp|Q96NZ8|WFKN1_HUMAN	WFIKKN1	WAP, Kazal, immunoglobulin, Kunitz and NTR domain-containing protein 1	4	331.496	348.217	318.731	321.178	320.157	328.391	308.104	292.75	312.491
sp|O94805|ACL6B_HUMAN	ACTL6B	Actin-like protein 6B	14	2690.75	2685.01	2645.06	2482.35	2408.02	2510.74	2665.49	2611.03	2652.14
sp|O96019|ACL6A_HUMAN	ACTL6A	Actin-like protein 6A	43	6248.84	6222.69	6132.49	6269.56	6195.28	6222.38	6115.27	6124.4	6134.95
tr|C9JQT4|C9JQT4_HUMAN	ACTL6B	Actin-like protein 6B (Fragment)	1	101.774	106.715	120.639	99.6621	108.906	90.6119	113.98	108.14	109.053
sp|P61803|DAD1_HUMAN	DAD1	Dolichyl-diphosphooligosaccharide--protein glycosyltransferase subunit DAD1	8	540.88	558.455	594.27	556.627	574.945	565.813	551.025	571.928	564.497
sp|Q5HYJ3|FA76B_HUMAN	FAM76B	Protein FAM76B	6	1696.76	1654.19	1637.43	1595.5	1632.39	1628.89	1641.92	1612.87	1655.8
sp|O60346|PHLP1_HUMAN	PHLPP1	PH domain leucine-rich repeat-containing protein phosphatase 1	5	91.4284	64.4922	70.9933	84.9929	83.9641	79.2225	85.5358	76.6339	94.4895
sp|P35237|SPB6_HUMAN	SERPINB6	Serpin B6	57	8916.32	8926.41	8874.68	8103.58	8276.87	8257.65	7699.31	7726.36	7831.93
sp|P50452|SPB8_HUMAN	SERPINB8	Serpin B8	9	708.85	696.513	712.759	760.021	736.905	794.68	714.488	717.696	713.96
sp|P50453|SPB9_HUMAN	SERPINB9	Serpin B9	29	505.072	478.69	594.236	594.906	603.985	610.432	554.706	594.626	551.019
sp|P49916|DNLI3_HUMAN	LIG3	DNA ligase 3	66	8692.18	8900.56	8777.6	8838.24	8972.08	8783.21	8832.97	8793.77	8973.62
sp|Q155Q3|DIXC1_HUMAN	DIXDC1	Dixin	11	1492.71	1590.22	1486.22	1451.61	1428.31	1451.59	1370.71	1435.07	1372.69
sp|Q14318-2|FKBP8_HUMAN	FKBP8	Isoform 2 of Peptidyl-prolyl cis-trans isomerase FKBP8	35	5228.5	5160.67	5117.4	5463.51	5496.39	5569.85	5549.93	5586.82	5472.52
sp|Q8N6C5-4|IGSF1_HUMAN	IGSF1	Isoform 4 of Immunoglobulin superfamily member 1	19	677.692	731.525	779.14	835.979	824.841	798.727	780.446	782.233	792.833
sp|Q96F63|CCD97_HUMAN	CCDC97	Coiled-coil domain-containing protein 97	13	1289.25	1321.97	1350.24	1277.5	1250.97	1297.22	1346.75	1440.38	1344.43
sp|Q96QE5|TEFM_HUMAN	TEFM	Transcription elongation factor, mitochondrial	9	452.8	447.491	435.084	411.883	435.098	416.961	399.836	405.115	392.728
sp|P17535|JUND_HUMAN	JUND	Transcription factor jun-D	9	335.985	316.997	351.158	366.83	383.928	381.103	342.192	366.264	345.999
sp|Q9Y394|DHRS7_HUMAN	DHRS7	Dehydrogenase/reductase SDR family member 7	28	4632.46	4615.09	4570.9	5007.57	5035.67	4987.24	5064.43	5051.61	5062.37
tr|H0YJE4|H0YJE4_HUMAN	DHRS7	Dehydrogenase/reductase SDR family member 7 (Fragment)	1	11.1795	13.8728	9.38624	11.7337	15.1358	9.46599	10.5765	15.9046	19.8603
sp|Q8IWB1|IPRI_HUMAN	ITPRIP	Inositol 1,4,5-trisphosphate receptor-interacting protein	9	696.108	710.072	696.54	687.622	652.921	656.616	769.826	750.226	739.022
sp|P24534|EF1B_HUMAN	EEF1B2	Elongation factor 1-beta	44	6257.44	6161.69	6038.59	5900.24	5916.15	5793.78	6008.02	5978	5842.74
sp|P29692-2|EF1D_HUMAN	EEF1D	Isoform 2 of Elongation factor 1-delta	35	4563.37	4573.24	4632.14	4508.03	4531.07	4433.95	4427.38	4294.83	4378.96
sp|P29692-3|EF1D_HUMAN	EEF1D	Isoform 3 of Elongation factor 1-delta	1	58.9395	46.3345	54.1203	50.0986	44.8211	50.7285	50.4105	48.8617	49.2689
sp|P52788|SPSY_HUMAN	SMS	Spermine synthase	35	5027.4	4894.86	4941.69	4914.77	5003.19	5010.1	5088.95	4983.9	4935.53
sp|P55083-2|MFAP4_HUMAN	MFAP4	Isoform 2 of Microfibril-associated glycoprotein 4	2	46.7675	40.0432	33.9281	44.4234	48.5904	43.6799	41.8925	42.0006	42.1661
sp|Q96F10|SAT2_HUMAN	SAT2	Diamine acetyltransferase 2	6	205.063	220.046	236.19	243.897	204.721	222.919	236.792	236.709	216.322
sp|Q4G0N4|NAKD2_HUMAN	NADK2	NAD kinase 2, mitochondrial	30	2101.61	2093.58	2215.09	2063.82	2060.36	2007.53	2162.25	2184.91	2119.52
sp|Q8TD16-2|BICD2_HUMAN	BICD2	Isoform 2 of Protein bicaudal D homolog 2	50	6849.93	6783.79	6763.14	6876.3	6846.08	6807.84	6572.89	6547.77	6659.15
sp|Q96G01|BICD1_HUMAN	BICD1	Protein bicaudal D homolog 1	13	3071.14	3095.51	2942.63	3135.58	3141.75	3120.29	2982.27	2994.33	2951.76
sp|P17812|PYRG1_HUMAN	CTPS1	CTP synthase 1	54	9433.51	9330.21	9367.72	9144.77	9261.52	9281.29	9780.72	9490.84	9490.3
sp|Q9NRF8|PYRG2_HUMAN	CTPS2	CTP synthase 2	32	3369.37	3336.75	3397.83	3353	3442.8	3423.08	3616.87	3576.34	3518.45
sp|Q96H78|S2544_HUMAN	SLC25A44	Solute carrier family 25 member 44	3	151.276	152.413	155.107	135.315	155.581	137.608	142.493	145.075	133.354
sp|Q96A35|RM24_HUMAN	MRPL24	39S ribosomal protein L24, mitochondrial	23	6350.23	6234.69	6405.13	5811.26	5922.92	5923.49	6011.18	5956.16	6088.3
sp|P63220|RS21_HUMAN	RPS21	40S ribosomal protein S21	24	5510.3	5559.99	5390.84	5702.88	5681.76	5665.12	5516.04	5555.11	5524.3
sp|Q5VUJ6|LRCH2_HUMAN	LRCH2	Leucine-rich repeat and calponin homology domain-containing protein 2	30	4660.97	4624.67	4451.63	4687.76	4613.28	4640.06	4570.72	4525.9	4535.77
sp|Q96II8|LRCH3_HUMAN	LRCH3	DISP complex protein LRCH3	34	3896.46	3803.64	3891.3	3697.87	3693.7	3756.39	3574.82	3603.03	3602.4
sp|Q9Y2L9-3|LRCH1_HUMAN	LRCH1	Isoform 3 of Leucine-rich repeat and calponin homology domain-containing protein 1	20	1900.79	1873.03	1868	1795.67	1852.69	1880.2	1857.72	1785.78	1829.15
sp|O75051|PLXA2_HUMAN	PLXNA2	Plexin-A2	40	4730.41	4688.1	4651.2	5418.42	5352.5	5294.47	4804.84	4788.18	4797.33
sp|P51805|PLXA3_HUMAN	PLXNA3	Plexin-A3	10	476.927	510.539	483.67	450.382	444.8	475.899	467.599	464.082	473.988
sp|Q9HCM2|PLXA4_HUMAN	PLXNA4	Plexin-A4	43	5612.22	5519.67	5408.06	5824.64	5823.94	5798.55	5643.82	5608.41	5803.41
sp|Q9UIW2|PLXA1_HUMAN	PLXNA1	Plexin-A1	37	2648.06	2652.53	2733.48	2992.83	2969.48	2963.34	2735.01	2805.98	2761.27
sp|Q9H3P2|NELFA_HUMAN	NELFA	Negative elongation factor A	23	2689.26	2691.13	2681.18	2739.58	2766.85	2795.57	2823.77	2917.69	2891.13
sp|Q12772|SRBP2_HUMAN	SREBF2	Sterol regulatory element-binding protein 2	3	81.5157	89.0693	96.7172	103.959	99.2711	92.0938	98.4648	95.1437	105.898
sp|P55196-3|AFAD_HUMAN	AFDN	Isoform 3 of Afadin	7	295.447	285.596	295.672	304.824	267.685	286.53	290.26	294.995	273.272
sp|P55196-5|AFAD_HUMAN	AFDN	Isoform 5 of Afadin	114	10468.3	10513.8	10635.8	10292.3	10226.8	10190	10165.7	10145.5	10031.6
sp|Q13308-6|PTK7_HUMAN	PTK7	Isoform 6 of Inactive tyrosine-protein kinase 7	88	6696.48	6561.8	6611.05	6666.08	6695.15	6674.64	6347.12	6252.13	6246.45
sp|Q13445|TMED1_HUMAN	TMED1	Transmembrane emp24 domain-containing protein 1	5	701.109	710.806	720.516	708.234	678.54	708.287	715.049	687.469	673.787
sp|O14548|COX7R_HUMAN	COX7A2L	Cytochrome c oxidase subunit 7A-related protein, mitochondrial	15	2418.13	2322.65	2353.32	2163.02	2158.81	2180.61	2058.77	2099.79	2057.76
sp|Q92692|NECT2_HUMAN	NECTIN2	Nectin-2	22	1349.85	1349.51	1339.78	1339.41	1334.78	1356.79	1322.16	1354.96	1321.32
sp|Q92692-2|NECT2_HUMAN	NECTIN2	Isoform Alpha of Nectin-2	1	7.55352	6.74116	7.6323	7.86251	12.1918	9.40808	8.68978	5.90651	9.07998
sp|O94888|UBXN7_HUMAN	UBXN7	UBX domain-containing protein 7	37	4096.94	4151.23	3990.71	4046.6	3912.5	3994.63	3929.78	4039.38	4015.17
sp|O43390|HNRPR_HUMAN	HNRNPR	Heterogeneous nuclear ribonucleoprotein R	6	592.051	623.087	611.752	613.343	615.296	597.459	593.253	603.599	624.924
sp|O43390-2|HNRPR_HUMAN	HNRNPR	Isoform 2 of Heterogeneous nuclear ribonucleoprotein R	113	25278.4	24628.6	24959.3	25258.8	24814.3	24973.8	25151.2	24862.8	24734.9
sp|O60506|HNRPQ_HUMAN	SYNCRIP	Heterogeneous nuclear ribonucleoprotein Q	100	12653.6	12791	12585.3	12764.8	12778.3	12721.4	12400.8	12392.3	12483.3
sp|O60506-3|HNRPQ_HUMAN	SYNCRIP	Isoform 3 of Heterogeneous nuclear ribonucleoprotein Q	2	547.538	549.344	537.478	588.933	557	578.592	503.139	544.039	526.94
sp|Q9NYB0|TE2IP_HUMAN	TERF2IP	Telomeric repeat-binding factor 2-interacting protein 1	21	3203.82	3262.88	3207.99	3069.42	3040.49	2953.46	3014.97	2977	3028.9
sp|P62241|RS8_HUMAN	RPS8	40S ribosomal protein S8	51	6232.96	6351.08	6371.43	6814.78	6889.07	6685.7	6428.76	6299.34	6258.3
sp|P07307|ASGR2_HUMAN	ASGR2	Asialoglycoprotein receptor 2	40	157.516	187.714	312.521	300.563	271.828	279.079	266.894	282.101	266.101
sp|P07307-2|ASGR2_HUMAN	ASGR2	Isoform 2 of Asialoglycoprotein receptor 2	1	3.22474	5.47233	4.3006	0	0	0.00701584	0	0	2.25406
sp|P62333|PRS10_HUMAN	PSMC6	26S proteasome regulatory subunit 10B	93	12718.8	12946	12736.7	12729.2	12741.1	12662.2	12875.2	12818.4	12882.2
sp|O75116|ROCK2_HUMAN	ROCK2	Rho-associated protein kinase 2	131	10516.9	10529.1	10947.9	11194.6	11166	11133.4	10673.9	10841.6	10835.6
sp|Q13464|ROCK1_HUMAN	ROCK1	Rho-associated protein kinase 1	52	4670.6	4711.37	4706.23	4815.49	4749.3	4825.7	4399.44	4516.49	4449.74
sp|Q6UWW8|EST3_HUMAN	CES3	Carboxylesterase 3	3	25.5642	22.0825	27.5466	23.4632	27.4294	21.5367	24.2481	23.91	24.3725
sp|O00748-4|EST2_HUMAN	CES2	Isoform 3 of Cocaine esterase	34	316.495	337.22	464.443	444.769	451.683	435.086	436.231	430.354	428.18
sp|P22303-2|ACES_HUMAN	ACHE	Isoform H of Acetylcholinesterase	1	39.1173	44.5718	43.0596	36.0979	46.0279	44.7507	43.8763	43.6242	41.6792
sp|P07900-2|HS90A_HUMAN	HSP90AA1	Isoform 2 of Heat shock protein HSP 90-alpha	283	49781.7	50167.9	49607.9	52047.5	51847.6	52043.4	49731.5	49972.5	49491.6
sp|P08238|HS90B_HUMAN	HSP90AB1	Heat shock protein HSP 90-beta	169	20743.6	21019	20881.5	22300.9	22373.6	22134.4	21049.4	21088.3	20898.2
sp|P14625|ENPL_HUMAN	HSP90B1	Endoplasmin	215	21272.7	21413.3	21523.6	24015	23593.6	23820.7	22721.6	22708.1	22520.6
sp|Q12931|TRAP1_HUMAN	TRAP1	Heat shock protein 75 kDa, mitochondrial	75	8679.51	8729.68	8843.04	8685.95	8558.61	8649.63	8733.39	8780.85	8680.19
sp|Q58FF7|H90B3_HUMAN	HSP90AB3P	Putative heat shock protein HSP 90-beta-3	3	249.96	232.448	252.356	231.762	242.448	228.459	212.668	229.303	216.647
sp|Q58FG0|HS905_HUMAN	HSP90AA5P	Putative heat shock protein HSP 90-alpha A5	1	109.713	106.993	109.545	104.957	107.237	102.431	99.0787	97.3625	89.8671
sp|Q58FG1|HS904_HUMAN	HSP90AA4P	Putative heat shock protein HSP 90-alpha A4	5	441.404	446.38	484.733	465.354	471.38	471.071	428.625	449.346	427.913
sp|Q9NQH7|XPP3_HUMAN	XPNPEP3	Xaa-Pro aminopeptidase 3	16	592.173	623.817	617.606	585.821	588.353	584.486	558.927	585.85	580.457
sp|P61371|ISL1_HUMAN	ISL1	Insulin gene enhancer protein ISL-1	10	785.96	767.102	752.88	753.618	778.331	768.392	726.142	738.551	731.585
sp|Q96A47|ISL2_HUMAN	ISL2	Insulin gene enhancer protein ISL-2	9	1251.95	1248.81	1254.97	1208.54	1213.3	1302.06	1237	1231.01	1255.04
sp|O75635|SPB7_HUMAN	SERPINB7	Serpin B7	2	153.031	153.745	157.104	185.727	192.829	203.183	177.128	183.877	190.404
sp|P08865|RSSA_HUMAN	RPSA	40S ribosomal protein SA	113	11216.4	11174.8	11243.9	10892.9	10878.9	10997.7	11028.2	11122.9	10967.5
sp|Q9Y216|MTMR7_HUMAN	MTMR7	Myotubularin-related protein 7	11	1013.86	1073.94	987.024	918.882	946.988	948.594	1026.75	1008.51	1052.07
sp|Q5VW32|BROX_HUMAN	BROX	BRO1 domain-containing protein BROX	31	7091.89	7100.33	7000.88	6990.37	6992.97	6957.62	7351.59	7288.91	7312.58
sp|O14734|ACOT8_HUMAN	ACOT8	Acyl-coenzyme A thioesterase 8	11	595.84	621.136	641.231	580.721	590.283	590.756	609.931	597.611	613.913
sp|Q09666|AHNK_HUMAN	AHNAK	Neuroblast differentiation-associated protein AHNAK	196	35615.2	35529.8	35536	38187.4	38278.2	38186.2	35829.4	35755.4	36070.3
sp|Q8IVF2|AHNK2_HUMAN	AHNAK2	Protein AHNAK2	4	597.954	605.234	571.312	529.617	520.943	533.796	540.789	592.583	586.626
sp|P62269|RS18_HUMAN	RPS18	40S ribosomal protein S18	36	4571.92	4551.71	4517.46	5028.4	4984.91	4896.69	4838.61	4738.79	4733.23
sp|P80303|NUCB2_HUMAN	NUCB2	Nucleobindin-2	28	1403.43	1412.56	1570.61	1348.91	1275.94	1331.63	1477.82	1494.86	1487.89
sp|P05198|IF2A_HUMAN	EIF2S1	Eukaryotic translation initiation factor 2 subunit 1	61	7830.77	7957.5	7879.04	7758.76	7762.13	7835.58	7989.75	8141.94	8078.6
sp|P61221|ABCE1_HUMAN	ABCE1	ATP-binding cassette sub-family E member 1	63	6647.62	6640.93	6643.2	6701.74	6927.27	6690.68	6761.23	6855.12	6758.35
tr|H0Y990|H0Y990_HUMAN	ABCE1	ATP-binding cassette sub-family E member 1 (Fragment)	2	364.644	389.121	375.419	353.955	367.151	374.815	382.726	384.037	407.246
sp|Q53H82|LACB2_HUMAN	LACTB2	Endoribonuclease LACTB2	25	2817.74	2770.48	2877.14	2838.43	2807.02	2794.76	2797.08	2799.73	2864.88
sp|Q9H074|PAIP1_HUMAN	PAIP1	Polyadenylate-binding protein-interacting protein 1	29	4895.4	4807.46	4845.67	4807.03	4815.19	4814.77	4887.83	4807.65	4885.19
sp|Q13740|CD166_HUMAN	ALCAM	CD166 antigen	53	11641.3	11272.1	11313.6	11463.5	11596.2	11490.4	10830.3	10599.6	10787.8
sp|Q9NZD2|GLTP_HUMAN	GLTP	Glycolipid transfer protein	12	1968.43	1937.36	1976.65	1907.04	1951.42	1906.61	1940.89	1934.45	1947.39
sp|O15381|NVL_HUMAN	NVL	Nuclear valosin-containing protein-like	32	4873.5	4918.22	4832.95	4852.6	4871.81	4898.09	4816.17	4885.73	4909.1
sp|O43933|PEX1_HUMAN	PEX1	Peroxisome biogenesis factor 1	23	2794.26	2822.82	2768.89	2652.9	2630.47	2737.75	2714.57	2711.73	2755.25
sp|P55072|TERA_HUMAN	VCP	Transitional endoplasmic reticulum ATPase	141	14703.7	14712.9	14523.6	15069.5	14992.5	14932.7	14811.2	14709	14678.7
sp|Q13608|PEX6_HUMAN	PEX6	Peroxisome assembly factor 2	7	250.904	272.371	282.009	266.842	245.071	259.868	271.692	286.589	283.414
sp|Q9Y4W6|AFG32_HUMAN	AFG3L2	AFG3-like protein 2	69	8829.09	9047.16	8964.78	8383.68	8429.29	8421.44	8597.38	8769.59	8685.15
sp|P51688|SPHM_HUMAN	SGSH	N-sulphoglucosamine sulphohydrolase	17	559.192	584.71	621.82	549.138	572.756	561.824	635.241	649.293	641.139
sp|P68036-3|UB2L3_HUMAN	UBE2L3	Isoform 3 of Ubiquitin-conjugating enzyme E2 L3	38	4098.8	3996.81	4107.58	3942.19	4050.14	3908.07	4172.65	4002.76	4110.72
sp|Q8N1G4|LRC47_HUMAN	LRRC47	Leucine-rich repeat-containing protein 47	61	10394.8	10364	10374.4	10017.4	10110.5	9908.41	10280.7	10065.1	10135.7
sp|Q9BZE2|PUS3_HUMAN	PUS3	tRNA pseudouridine(38/39) synthase	9	895.002	860.413	890.229	879.397	894.165	931.277	862.127	886.447	901.987
sp|Q9H4H8|FA83D_HUMAN	FAM83D	Protein FAM83D	16	1361.52	1386.74	1348.52	1433.65	1461.79	1379.3	1330.44	1289.45	1291.78
sp|O75037|KI21B_HUMAN	KIF21B	Kinesin-like protein KIF21B	3	197.676	184.645	195.422	196.051	209.123	188.612	185.651	207.326	199.771
sp|Q2M1P5|KIF7_HUMAN	KIF7	Kinesin-like protein KIF7	5	616.073	641.364	637.387	617.801	627.794	596.114	637.612	645.76	604.86
sp|Q7Z4S6-4|KI21A_HUMAN	KIF21A	Isoform 4 of Kinesin-like protein KIF21A	130	27993.5	27768.6	27091.5	27965.4	28152.9	28145.9	28347.4	28033.3	28231.4
sp|Q9NS87|KIF15_HUMAN	KIF15	Kinesin-like protein KIF15	69	10572.4	10570.1	10606.4	10419.8	10445.9	10599.4	10432.1	10601.5	10556.7
tr|H0YI78|H0YI78_HUMAN	KIF21A	Kinesin-like protein KIF21A (Fragment)	2	840.024	882.581	843.143	846.602	855.347	818.552	828.498	859.222	878.767
sp|Q15031|SYLM_HUMAN	LARS2	Probable leucine--tRNA ligase, mitochondrial	69	4571.98	4740.38	4799.3	4601.4	4595.7	4575.99	4676.2	4649.69	4659.14
sp|Q14997|PSME4_HUMAN	PSME4	Proteasome activator complex subunit 4	81	6846.22	6990.2	6962.57	6634.81	6699.58	6725.09	6824.81	7017.7	6963.2
sp|Q8N573|OXR1_HUMAN	OXR1	Oxidation resistance protein 1	24	936.584	947.574	1027.77	887.534	937.174	914.57	961.109	971.41	978.899
sp|Q86XI2|CNDG2_HUMAN	NCAPG2	Condensin-2 complex subunit G2	35	4722.75	4755.45	4755.64	4563.48	4551.14	4518.2	4698.33	4747.9	4780.33
sp|Q99523|SORT_HUMAN	SORT1	Sortilin	30	1578.64	1607.1	1723.35	1404.97	1390.61	1391.76	1615.36	1600.28	1563.49
sp|Q9H2W6|RM46_HUMAN	MRPL46	39S ribosomal protein L46, mitochondrial	23	2820.5	2906.97	2995.31	2750.4	2672.86	2749.58	2694.46	2743.31	2746.24
sp|P99999|CYC_HUMAN	CYCS	Cytochrome c	42	3666.26	3623.47	3643.43	3614.62	3736.43	3672.07	3451.1	3393.45	3399.22
tr|J3KPF0|J3KPF0_HUMAN	HECTD4	Probable E3 ubiquitin-protein ligase HECTD4	51	4066.22	4004.92	4041.98	3827.47	3775.31	3784.76	3862.06	3936.46	3981.28
sp|Q9GZT8|NIF3L_HUMAN	NIF3L1	NIF3-like protein 1	38	5031.29	4928.22	5102.06	4888.2	4798.79	4721.16	5099.4	5010.57	5029.96
sp|Q96NW4|ANR27_HUMAN	ANKRD27	Ankyrin repeat domain-containing protein 27	7	309.546	291.001	294.448	320.57	311.165	316.356	308.969	314.347	313.696
sp|Q92888-3|ARHG1_HUMAN	ARHGEF1	Isoform 3 of Rho guanine nucleotide exchange factor 1	55	4569.58	4614.46	4598.64	4524.31	4432.04	4525.63	4551.5	4565.57	4518.83
sp|Q8N3C0|ASCC3_HUMAN	ASCC3	Activating signal cointegrator 1 complex subunit 3	103	10348.1	10533.7	10500.6	10650.9	10494.4	10596.3	10678.8	10495.1	10487.8
sp|P08195-4|4F2_HUMAN	SLC3A2	Isoform 4 of 4F2 cell-surface antigen heavy chain	58	2439.8	2487.53	2620.1	2628.81	2713.7	2659.53	2551.89	2599.39	2584.35
tr|F5H867|F5H867_HUMAN	SLC3A2	4F2 cell-surface antigen heavy chain (Fragment)	1	57.8426	58.2667	72.3184	69.0515	58.4785	61.0566	72.423	65.0568	67.5833
sp|Q9BQ95|ECSIT_HUMAN	ECSIT	Evolutionarily conserved signaling intermediate in Toll pathway, mitochondrial	11	945.335	913.51	913.651	833.061	888.504	822.527	865.175	872.742	843.448
sp|Q9H089|LSG1_HUMAN	LSG1	Large subunit GTPase 1 homolog	40	4129.15	4225.64	4054.22	4181.43	4281.19	4224.29	4020.04	4025.5	4045.21
sp|Q9BQG0-2|MBB1A_HUMAN	MYBBP1A	Isoform 2 of Myb-binding protein 1A	106	16310	16690	16719.7	17291.9	17430.5	17361.5	17943.1	17850.3	17993.5
sp|O14727|APAF_HUMAN	APAF1	Apoptotic protease-activating factor 1	44	5923.69	5983.2	5954.76	5840.67	5971.63	5830.64	5910.76	6015.09	6021.78
sp|Q7L590|MCM10_HUMAN	MCM10	Protein MCM10 homolog	16	1991.04	1930.91	1965.28	2097.92	2060.4	2061.2	1975.87	2004.86	2032.36
sp|Q17RN3|FA98C_HUMAN	FAM98C	Protein FAM98C	11	571.065	580.802	569.245	545.433	527.969	525.258	549.318	593.313	570.605
sp|P01011|AACT_HUMAN	SERPINA3	Alpha-1-antichymotrypsin	25	122.297	130.45	278.556	308.318	231.336	240.696	266.858	247.22	263.035
sp|P30740|ILEU_HUMAN	SERPINB1	Leukocyte elastase inhibitor	39	2168.46	2127.44	2277.65	2181.78	2153.89	2200.96	2210.07	2188.78	2124.52
sp|Q86X10|RLGPB_HUMAN	RALGAPB	Ral GTPase-activating protein subunit beta	39	2483.31	2553.59	2544.3	2495.73	2454.27	2460.4	2563.02	2551.18	2585.51
sp|Q9H3Q1|BORG4_HUMAN	CDC42EP4	Cdc42 effector protein 4	19	1190.94	1139.24	1182.26	1039.11	1072.28	1049.63	952.362	952.833	935.357
sp|P27816|MAP4_HUMAN	MAP4	Microtubule-associated protein 4	98	22888.1	22566.5	22606.8	25616.6	25585.1	25479.4	24306.8	24361.2	24430.9
tr|E7EVA0|E7EVA0_HUMAN	MAP4	Microtubule-associated protein	30	4037.09	4005.36	4003.02	4206.72	4256.1	4170.52	3836.31	3898.93	3884.28
sp|P31930|QCR1_HUMAN	UQCRC1	Cytochrome b-c1 complex subunit 1, mitochondrial	75	5288.01	5311.42	5359.54	5335.34	5376.46	5366.71	5156.47	5193.77	5116.5
sp|P52306-5|GDS1_HUMAN	RAP1GDS1	Isoform 5 of Rap1 GTPase-GDP dissociation stimulator 1	52	9689.5	9542.92	9654.29	9602.72	9432.52	9413.17	9844.95	9831.25	9857.7
sp|Q9C0E2|XPO4_HUMAN	XPO4	Exportin-4	44	4234.91	4173.41	4165.39	4087.81	4078.01	4103.76	4177.58	4229.98	4188.33
sp|Q8NB46|ANR52_HUMAN	ANKRD52	Serine/threonine-protein phosphatase 6 regulatory ankyrin repeat subunit C	24	1958.92	1952.36	1930.13	1935.06	1995.48	1970.42	1894.49	1864.82	1894.87
sp|Q6P5W5|S39A4_HUMAN	SLC39A4	Zinc transporter ZIP4	4	31.0163	26.9968	42.9632	35.8169	37.2847	33.5486	32.0869	35.1377	39.361
sp|Q9NP73|ALG13_HUMAN	ALG13	Putative bifunctional UDP-N-acetylglucosamine transferase and deubiquitinase ALG13	1	697.252	689.856	671.267	709.29	710.666	756.705	747.878	740.973	745.609
sp|Q14232|EI2BA_HUMAN	EIF2B1	Translation initiation factor eIF-2B subunit alpha	40	6305.86	6354.6	6146.68	6466.67	6593.02	6500.35	6800.29	6849.29	6792.22
sp|Q9NX62|IMPA3_HUMAN	IMPAD1	Golgi-resident adenosine 3',5'-bisphosphate 3'-phosphatase	20	1767.47	1801.7	1785.92	1524.03	1518.25	1541.7	1820.01	1849.23	1837.71
sp|Q9NSE4|SYIM_HUMAN	IARS2	Isoleucine--tRNA ligase, mitochondrial	92	14056.7	13896.4	14071.4	13779.1	13605.7	13824.1	13586.9	13511.1	13402.7
sp|P05067|A4_HUMAN	APP	Amyloid-beta precursor protein	21	3703.89	3612.12	3614.82	4638.97	4731.39	4628.64	3810.76	3793.32	3862.01
sp|Q06481|APLP2_HUMAN	APLP2	Amyloid-like protein 2	32	1627.8	1619.56	1634.85	1994.77	2002.93	1995.9	1713.96	1686.93	1725.79
sp|A2RTX5|SYTC2_HUMAN	TARSL2	Threonine--tRNA ligase 2, cytoplasmic	15	1163.61	1204.51	1208.05	1137.17	1180.05	1151.12	1196.68	1200.79	1245
sp|P26639|SYTC_HUMAN	TARS1	Threonine--tRNA ligase 1, cytoplasmic	104	14403.8	14143.9	14299.9	14173.9	14177.5	13955.4	14758.4	14495.9	14562.9
sp|Q9NUQ3|TXLNG_HUMAN	TXLNG	Gamma-taxilin	30	5224.01	5252.6	5194.97	5367.99	5155.17	5280.5	5208.65	5308.78	5242.58
sp|Q9NQ89|CL004_HUMAN	C12orf4	Protein C12orf4	8	586.78	569.88	575.096	573.831	560.61	577.904	588.331	602.99	580.336
sp|P40939|ECHA_HUMAN	HADHA	Trifunctional enzyme subunit alpha, mitochondrial	128	15014.2	14952	15140	14859.2	14877.9	14815.4	15119	14954.3	15066.7
sp|Q9NYU1|UGGG2_HUMAN	UGGT2	UDP-glucose:glycoprotein glucosyltransferase 2	18	822.673	857.388	854.515	900.497	885.307	893.704	999.494	956.649	1004.45
sp|Q9NYU2|UGGG1_HUMAN	UGGT1	UDP-glucose:glycoprotein glucosyltransferase 1	121	11491.2	11622.7	11778.8	12347.2	12193.6	12259.6	12274.5	12347.2	12335.8
sp|Q9BX70|BTBD2_HUMAN	BTBD2	BTB/POZ domain-containing protein 2	6	693.202	693.089	667.033	703.688	649.868	671.059	671.843	711.302	711.04
sp|Q9H0C5|BTBD1_HUMAN	BTBD1	BTB/POZ domain-containing protein 1	3	289.095	283.944	299.13	294.856	275.291	279.201	272.418	264.86	284.504
sp|O75027-2|ABCB7_HUMAN	ABCB7	Isoform 2 of ATP-binding cassette sub-family B member 7, mitochondrial	9	986.258	1023.77	983.522	884.488	915.586	935.616	935.443	950.908	974.773
sp|P36871|PGM1_HUMAN	PGM1	Phosphoglucomutase-1	82	7108.7	7055.9	7237.3	7640.39	7537.3	7705.11	8109.56	8028.33	7856.2
sp|Q17RY0|CPEB4_HUMAN	CPEB4	Cytoplasmic polyadenylation element-binding protein 4	2	230.371	237.553	229.979	230.497	231.336	257.907	218.288	202.087	202.061
sp|Q7Z5Q1-9|CPEB2_HUMAN	CPEB2	Isoform 8 of Cytoplasmic polyadenylation element-binding protein 2	6	674.351	657.494	622.849	638.074	637.511	625.139	603.365	600.829	598.133
sp|Q8N3Z3|GTPB8_HUMAN	GTPBP8	GTP-binding protein 8	5	241.17	224.26	222.417	232.595	244.828	237.473	239.413	224.709	237.947
sp|P17301|ITA2_HUMAN	ITGA2	Integrin alpha-2	70	6196.18	6287.9	6315.81	6705.81	6426.8	6592.49	6404.01	6432.82	6314.31
tr|E7ESP4|E7ESP4_HUMAN	ITGA2	Integrin alpha-2	4	214.471	201.71	215.529	223.04	232.676	219.026	220.452	240.96	208.885
sp|Q7Z333|SETX_HUMAN	SETX	Probable helicase senataxin	44	4548.8	4629.31	4523.6	4319.05	4291.87	4410	4610.58	4542.57	4576.28
sp|Q86YA3|ZGRF1_HUMAN	ZGRF1	Protein ZGRF1	1	22.02	22.1736	22.2468	28.1631	24.2025	18.9563	22.4169	23.0912	17.7905
sp|Q92621|NU205_HUMAN	NUP205	Nuclear pore complex protein Nup205	111	15740.2	15865.2	15753.5	16099	15974.3	15848.6	15810.3	16085.2	16248.2
sp|Q8N556-2|AFAP1_HUMAN	AFAP1	Isoform 2 of Actin filament-associated protein 1	10	1553.22	1535.92	1459.66	1504.72	1484.79	1500.85	1452.91	1470.84	1500.8
sp|Q8N111|CEND_HUMAN	CEND1	Cell cycle exit and neuronal differentiation protein 1	7	3677.92	3581.66	3627.02	3512.68	3536.63	3576.3	3564.09	3656.32	3646.23
sp|Q96PV6|LENG8_HUMAN	LENG8	Leukocyte receptor cluster member 8	20	1747.62	1706.47	1743.15	1659.6	1686.3	1672.95	1697.35	1724.79	1733.17
sp|Q5M775|CYTSB_HUMAN	SPECC1	Cytospin-B	17	2405.74	2344.22	2315.93	2392.59	2285.49	2381.9	2313.93	2268.31	2240.29
sp|Q9BW85|YJU2_HUMAN	YJU2	Splicing factor YJU2	9	445.968	448.971	459.837	457.797	452.3	473.362	454.545	443.174	423.142
sp|O15484|CAN5_HUMAN	CAPN5	Calpain-5	17	2756.84	2837.49	2742.42	2851.46	2829.06	2830.45	2700.92	2688.5	2781.79
sp|P51530|DNA2_HUMAN	DNA2	DNA replication ATP-dependent helicase/nuclease DNA2	17	1334.8	1352.31	1340.42	1460.97	1474.91	1453.19	1365.05	1348.12	1392.33
sp|Q92900|RENT1_HUMAN	UPF1	Regulator of nonsense transcripts 1	106	10799.1	10859.7	10814.1	10607.1	10639.6	10578.8	10568.4	10574.5	10512
sp|Q9NVM9|INT13_HUMAN	INTS13	Integrator complex subunit 13	41	5773.29	5814.45	5763.07	5805.28	5830.48	5810.46	5651.42	5772.86	5700.11
sp|Q5T7W0|ZN618_HUMAN	ZNF618	Zinc finger protein 618	22	4078.98	4053.2	4068.36	4008.24	3870.26	3905.48	4333.54	4433.75	4433.69
sp|Q5T7W0-2|ZN618_HUMAN	ZNF618	Isoform 2 of Zinc finger protein 618	3	599.32	636.768	614.019	592.042	620.709	603.781	634.534	653.61	633.938
tr|B1ALC2|B1ALC2_HUMAN	ZNF618	Zinc finger protein 618 (Fragment)	2	29.845	46.1526	28.153	24.4815	30.1679	40.3602	28.7657	38.0425	38.6846
sp|Q86VM9|ZCH18_HUMAN	ZC3H18	Zinc finger CCCH domain-containing protein 18	39	6719.35	6724.96	6659.1	6455.06	6440.52	6529.33	6464.24	6550.37	6671.03
sp|Q8WVB6|CTF18_HUMAN	CHTF18	Chromosome transmission fidelity protein 18 homolog	15	2274.1	2184.74	2267.46	2170.06	2142.52	2180.1	2239.77	2211.06	2188.52
sp|Q96NT5|PCFT_HUMAN	SLC46A1	Proton-coupled folate transporter	2	90.8065	99.6567	81.3216	104.747	97.1868	107.211	83.1694	96.8061	88.4453
sp|Q96KP1|EXOC2_HUMAN	EXOC2	Exocyst complex component 2	42	4774.99	4726.6	4640.58	4459.23	4521.71	4523.65	4726.55	4717.15	4791.69
sp|O75891-3|AL1L1_HUMAN	ALDH1L1	Isoform 3 of Cytosolic 10-formyltetrahydrofolate dehydrogenase	51	381.287	406.763	553.412	558.636	538.177	507.163	515.817	535.795	521.386
sp|Q3SY69|AL1L2_HUMAN	ALDH1L2	Mitochondrial 10-formyltetrahydrofolate dehydrogenase	19	2694.34	2682.42	2719.48	1949.11	1914.37	1966.78	2447.53	2522.17	2519.24
sp|P46199|IF2M_HUMAN	MTIF2	Translation initiation factor IF-2, mitochondrial	27	2366.54	2453.85	2427.56	2358.35	2303.47	2363.62	2350.56	2400.34	2355.54
sp|O75351|VPS4B_HUMAN	VPS4B	Vacuolar protein sorting-associated protein 4B	39	6079.19	6123.03	6170.31	6122.3	6160.42	6119.42	6090.28	5839.09	6000.9
sp|Q6PIW4|FIGL1_HUMAN	FIGNL1	Fidgetin-like protein 1	19	1932.99	1968.46	1942.09	1973.19	1967.29	1935.1	1938.38	1912.7	1875.65
sp|Q9UBP0|SPAST_HUMAN	SPAST	Spastin	10	1270.54	1269.52	1233.17	1176.88	1224.61	1194.89	1242.66	1208.42	1213.78
sp|Q9UN37|VPS4A_HUMAN	VPS4A	Vacuolar protein sorting-associated protein 4A	23	1395.3	1414.95	1417	1341.93	1391.41	1374.63	1362.39	1362.68	1337.19
sp|Q9HAV7|GRPE1_HUMAN	GRPEL1	GrpE protein homolog 1, mitochondrial	28	4406.72	4335.29	4383.16	3944.5	3970.21	4026.76	3979.07	3867.34	3809.15
sp|Q12929|EPS8_HUMAN	EPS8	Epidermal growth factor receptor kinase substrate 8	24	828.595	800.534	888.779	929.888	910.174	874.254	849.734	877.601	881.853
sp|Q92696|PGTA_HUMAN	RABGGTA	Geranylgeranyl transferase type-2 subunit alpha	44	4068.58	4081.31	4209.88	4126.32	4105.04	4144.96	4282.94	4185.1	4199.76
sp|O15021|MAST4_HUMAN	MAST4	Microtubule-associated serine/threonine-protein kinase 4	1	37.1538	39.8963	41.6679	42.7774	43.6537	43.7451	40.5872	39.6993	42.0168
sp|O60307|MAST3_HUMAN	MAST3	Microtubule-associated serine/threonine-protein kinase 3	2	70.1361	58.9108	61.07	56.5192	55.2732	49.3694	41.1104	56.6209	46.684
sp|P51812|KS6A3_HUMAN	RPS6KA3	Ribosomal protein S6 kinase alpha-3	40	999.222	993.856	1255.84	1232.58	1205.48	1231.24	1222.42	1241.36	1171.63
sp|Q15418|KS6A1_HUMAN	RPS6KA1	Ribosomal protein S6 kinase alpha-1	42	4816.95	4856.49	4927.32	4698.64	4681.19	4745.08	4870.4	4876.25	4865.04
sp|Q6P0Q8|MAST2_HUMAN	MAST2	Microtubule-associated serine/threonine-protein kinase 2	10	584.341	571.625	549.058	538.822	552.916	541.653	535.863	548.478	554.244
sp|Q86UE8|TLK2_HUMAN	TLK2	Serine/threonine-protein kinase tousled-like 2	18	1611.05	1581.86	1523.73	1606.61	1613.12	1569.84	1570.55	1570.19	1548.98
sp|Q8IW41|MAPK5_HUMAN	MAPKAPK5	MAP kinase-activated protein kinase 5	3	348.392	351.126	345.306	320.368	297.396	318.433	336.951	353.582	350.512
sp|Q96GX5|GWL_HUMAN	MASTL	Serine/threonine-protein kinase greatwall	17	2097.91	2105.98	2091.99	2237.06	2186.74	2219.99	2071.96	2070.31	2035.49
sp|Q9UK32|KS6A6_HUMAN	RPS6KA6	Ribosomal protein S6 kinase alpha-6	9	709.163	725.067	754.94	796.731	794.586	781.474	745.703	754.666	739.373
sp|Q9UKI8|TLK1_HUMAN	TLK1	Serine/threonine-protein kinase tousled-like 1	11	865.873	816.325	842.918	826.862	825.383	799.627	813.66	817.745	820.727
sp|Q9Y2H9|MAST1_HUMAN	MAST1	Microtubule-associated serine/threonine-protein kinase 1	8	407.315	412.038	405.668	386.475	412.03	397.928	395.951	375.012	370.322
sp|Q567U6|CCD93_HUMAN	CCDC93	Coiled-coil domain-containing protein 93	38	6685.71	6574.85	6678.04	6522	6469.61	6641.41	6779.91	6670.84	6631.16
sp|Q15014|MO4L2_HUMAN	MORF4L2	Mortality factor 4-like protein 2	12	1900.88	1872.71	1849.03	1893.69	1793.97	1798.41	1826.27	1875.41	1892.11
sp|Q9UBU8-2|MO4L1_HUMAN	MORF4L1	Isoform 2 of Mortality factor 4-like protein 1	18	3240.78	3214.72	3275.27	3347.15	3375.93	3379.64	3299.22	3297.61	3308.35
sp|O75879|GATB_HUMAN	GATB	Glutamyl-tRNA(Gln) amidotransferase subunit B, mitochondrial	21	1471.66	1528.69	1512.78	1465.59	1442.61	1415.92	1439	1454.17	1432.81
sp|O14640|DVL1_HUMAN	DVL1	Segment polarity protein dishevelled homolog DVL-1	4	117.801	125.889	119.282	115.605	118.701	110.961	104.797	109.405	109.959
sp|O14641|DVL2_HUMAN	DVL2	Segment polarity protein dishevelled homolog DVL-2	16	1509.34	1456.04	1449.67	1371.16	1295.26	1317.29	1380.42	1385.95	1337.19
sp|Q92997|DVL3_HUMAN	DVL3	Segment polarity protein dishevelled homolog DVL-3	5	168.11	180.82	171.143	167.107	176.589	158.573	149.794	153.706	146.434
sp|P82921|RT21_HUMAN	MRPS21	28S ribosomal protein S21, mitochondrial	10	2088.15	2099.52	2162.99	2029.46	2024.78	2056.52	1855.11	1881.25	1876.44
sp|P02458|CO2A1_HUMAN	COL2A1	Collagen alpha-1(II) chain	11	295.087	298.678	279.586	278.944	285.474	294.299	296.382	271.906	276.093
sp|Q9BZD2|S29A3_HUMAN	SLC29A3	Equilibrative nucleoside transporter 3	2	39.7601	31.8656	36.0914	44.5098	40.2892	30.4644	39.2431	32.0515	32.7111
sp|P52434|RPAB3_HUMAN	POLR2H	DNA-directed RNA polymerases I, II, and III subunit RPABC3	17	2964.66	3048.02	2943.39	2753.45	2694.44	2848.51	2850.31	2981.29	2972.09
sp|Q9NQ92|COPRS_HUMAN	COPRS	Coordinator of PRMT5 and differentiation stimulator	7	311.158	299.368	305.287	298.898	317.094	287.934	296.577	319.611	308.723
sp|Q9H223|EHD4_HUMAN	EHD4	EH domain-containing protein 4	55	7773.29	7843.8	7741.89	7702.89	7651.53	7558.76	7732.74	7672.89	7653.76
sp|Q9H4M9|EHD1_HUMAN	EHD1	EH domain-containing protein 1	42	4482.06	4535.21	4668.91	4719.89	4712.95	4742.94	4733.41	4760.85	4765.84
sp|Q9NZN3|EHD3_HUMAN	EHD3	EH domain-containing protein 3	38	5066.76	5036.22	5093.67	5135.75	5102.96	5101.76	5124.48	5082.47	5133.36
sp|Q8NI27|THOC2_HUMAN	THOC2	THO complex subunit 2	80	8596.63	8530.63	8654.15	8310.82	8469.28	8373.19	8470.7	8445.24	8492.13
sp|Q16594|TAF9_HUMAN	TAF9	Transcription initiation factor TFIID subunit 9	10	1622.69	1685.56	1660.27	1460.49	1474.29	1447.7	1489.75	1474.33	1547.03
sp|Q9HBM6|TAF9B_HUMAN	TAF9B	Transcription initiation factor TFIID subunit 9B	2	1100.18	1085.82	1127.48	1014.18	1008.96	1001.77	1053.54	1046.06	1078.76
sp|P62263|RS14_HUMAN	RPS14	40S ribosomal protein S14	41	4074.63	4039.06	4040.02	4196.94	4242.13	4110.83	4034.4	4004.83	3987.54
sp|P02787|TRFE_HUMAN	TF	Serotransferrin	107	546.873	590.791	964.604	998.9	945.758	900.235	909.851	868.338	887.313
sp|Q8NE62|CHDH_HUMAN	CHDH	Choline dehydrogenase, mitochondrial	23	333.368	323.939	473.597	432.15	435.54	416.803	418.823	420.974	426.344
sp|Q9H7N4|SFR19_HUMAN	SCAF1	Splicing factor, arginine/serine-rich 19	20	3496.45	3508.79	3427.06	3469.86	3545.65	3491.74	3286.07	3351.97	3339.38
sp|Q9P1Y6|PHRF1_HUMAN	PHRF1	PHD and RING finger domain-containing protein 1	7	902.524	884.359	894.444	841.263	818.693	887.965	814.39	819.507	842.275
sp|Q9BXW6|OSBL1_HUMAN	OSBPL1A	Oxysterol-binding protein-related protein 1	7	507.33	506.012	508.391	473.058	489.855	466.444	503.489	498.099	531.515
sp|Q9H1P3|OSBL2_HUMAN	OSBPL2	Oxysterol-binding protein-related protein 2	10	519.575	508.113	502.602	656.617	656.572	653.167	548.769	538.402	537.806
sp|Q5T1V6|DDX59_HUMAN	DDX59	Probable ATP-dependent RNA helicase DDX59	32	3350.09	3412.79	3303.52	3225.7	3223.82	3161.26	3263.47	3414.1	3383.37
sp|O15164|TIF1A_HUMAN	TRIM24	Transcription intermediary factor 1-alpha	51	6042.69	6009.87	6078.24	6283.18	6343.02	6270.2	6098.34	6028.69	6012.18
sp|Q9UPN9-2|TRI33_HUMAN	TRIM33	Isoform Beta of E3 ubiquitin-protein ligase TRIM33	49	6869.64	6745.5	6728.11	6814.26	6778.84	6706.89	6512.37	6583.25	6615.5
tr|H0Y612|H0Y612_HUMAN	TRIM33	E3 ubiquitin-protein ligase TRIM33 (Fragment)	5	231.851	222.483	233.312	204.952	214.372	208.552	220.453	225.031	209.359
sp|O15027|SC16A_HUMAN	SEC16A	Protein transport protein Sec16A	1	58.9733	68.7338	65.6384	64.3281	53.9977	59.1718	52.6597	60.2514	46.9517
sp|O15027-5|SC16A_HUMAN	SEC16A	Isoform 5 of Protein transport protein Sec16A	38	3911.74	3939.98	3835.74	3719.49	3687.55	3741.02	3511.09	3552.04	3564.34
sp|Q5H9F3-3|BCORL_HUMAN	BCORL1	Isoform 3 of BCL-6 corepressor-like protein 1	9	1062.62	1021.34	1007.84	1005.14	1023.73	988.673	1057.61	1018.76	1030.44
sp|Q14151|SAFB2_HUMAN	SAFB2	Scaffold attachment factor B2	68	8761.85	8923.58	8813.39	8611.05	8609.27	8522.42	8453.47	8645.99	8491.58
sp|Q15424-3|SAFB1_HUMAN	SAFB	Isoform 3 of Scaffold attachment factor B1	45	6797.66	6720.26	6764.19	6666.58	6727.86	6720.56	6645.22	6582.24	6443.88
sp|Q96AC1-3|FERM2_HUMAN	FERMT2	Isoform 3 of Fermitin family homolog 2	88	20693	20550.3	20295.6	20942.5	21164.7	20957.9	22159.1	21940.6	22010.4
sp|Q9BQL6|FERM1_HUMAN	FERMT1	Fermitin family homolog 1	26	253.84	275.704	365.138	393.612	371.275	411.324	338.363	363.197	346.207
sp|Q9UIF8|BAZ2B_HUMAN	BAZ2B	Bromodomain adjacent to zinc finger domain protein 2B	24	1931.04	1989.09	1892.63	1948.07	1913.85	1938.61	1939.36	2022.38	1985.62
sp|Q08AM6|VAC14_HUMAN	VAC14	Protein VAC14 homolog	35	4849.02	4928.93	4853.77	4569.56	4582.04	4602.05	4643.02	4767.58	4701.14
sp|P01019|ANGT_HUMAN	AGT	Angiotensinogen	27	156.686	168.216	301.875	272.061	272.012	240.141	268.797	272.399	257.141
sp|Q13433|S39A6_HUMAN	SLC39A6	Zinc transporter ZIP6	5	713.426	736.899	680.563	720.099	705.901	718.634	705.323	698.825	697.125
sp|Q66K14|TBC9B_HUMAN	TBC1D9B	TBC1 domain family member 9B	30	2303.12	2336.33	2305.82	2315.82	2245.99	2276.5	2262.71	2351.05	2305.09
sp|Q6ZT07|TBCD9_HUMAN	TBC1D9	TBC1 domain family member 9	11	282.032	296.608	295.948	287.865	278.243	279.583	293.425	300.391	286.214
sp|P35659|DEK_HUMAN	DEK	Protein DEK	42	4254.67	4320.03	4270.06	4243.79	4191.77	4299.68	4142.66	4217.48	4201.01
sp|Q53F19|NCBP3_HUMAN	NCBP3	Nuclear cap-binding protein subunit 3	19	3507.13	3501.97	3472.34	3457.49	3347.45	3420.52	3178.85	3307.72	3306.86
sp|Q9UKM7|MA1B1_HUMAN	MAN1B1	Endoplasmic reticulum mannosyl-oligosaccharide 1,2-alpha-mannosidase	17	1267.58	1264.23	1329.92	1168.92	1210.2	1223.74	1243.36	1308.61	1276.14
sp|P08582|TRFM_HUMAN	MELTF	Melanotransferrin	16	1856.94	1792.75	1778.18	1638.69	1650.11	1639.38	1688.48	1711.79	1705.62
sp|Q9UNH6-3|SNX7_HUMAN	SNX7	Isoform 3 of Sorting nexin-7	44	7762.12	7756.88	7594.77	7189.97	7348.72	7333.41	7407.08	7380.18	7540.17
sp|Q9UIS9-9|MBD1_HUMAN	MBD1	Isoform 9 of Methyl-CpG-binding domain protein 1	21	5260.54	5332.98	5406.72	5148.92	5290.23	5197.85	5188.25	5293.89	5331.85
sp|P46013|KI67_HUMAN	MKI67	Proliferation marker protein Ki-67	128	23577.6	23611.3	23576.8	24189.1	24090	23932.3	23321.4	23558.2	23552.9
sp|P46013-2|KI67_HUMAN	MKI67	Isoform Short of Proliferation marker protein Ki-67	1	196.072	204.459	196.69	182.547	158.105	171.782	140.906	133.423	136.141
sp|Q8IV48|ERI1_HUMAN	ERI1	3'-5' exoribonuclease 1	20	3390.5	3331.53	3262.27	3327.99	3370.85	3394.1	3579.91	3538.33	3493.11
sp|P49959-3|MRE11_HUMAN	MRE11	Isoform 3 of Double-strand break repair protein MRE11	53	7453.1	7420.73	7287.95	7187.45	7110.06	7063.17	6935.56	6992.45	6986.76
sp|Q9NRC8|SIR7_HUMAN	SIRT7	NAD-dependent protein deacetylase sirtuin-7	3	199.698	187.401	186.122	173.81	185.717	199.666	194.69	195.152	202.673
sp|Q86VS8|HOOK3_HUMAN	HOOK3	Protein Hook homolog 3	41	4091.34	4175.7	4054.5	3928.11	3851.74	3916.93	3850.39	3991.54	3970.36
sp|Q9UJC3|HOOK1_HUMAN	HOOK1	Protein Hook homolog 1	39	2589.52	2728.42	2766.17	2594.11	2531.52	2656.82	2648.84	2715.95	2707.69
sp|P49753|ACOT2_HUMAN	ACOT2	Acyl-coenzyme A thioesterase 2, mitochondrial	31	1422.5	1467.77	1529.62	1459.64	1426.62	1438.86	1502.51	1463.53	1478.76
sp|Q86TX2|ACOT1_HUMAN	ACOT1	Acyl-coenzyme A thioesterase 1	2	12.6343	14.4471	17.4582	14.6712	15.1259	12.3504	16.4844	12.4839	14.5103
sp|Q68DQ2|CRBG3_HUMAN	CRYBG3	Very large A-kinase anchor protein	28	2670.04	2636.84	2559.09	2689.88	2765.88	2725.36	2519.98	2575.97	2564.36
sp|Q15019-2|SEPT2_HUMAN	SEPTIN2	Isoform 2 of Septin-2	67	9472.49	9404.74	9269.07	9275.36	9382.35	9266.32	9190.95	9208.56	9167.86
sp|Q9UKX7|NUP50_HUMAN	NUP50	Nuclear pore complex protein Nup50	47	7841.08	7958.46	7885.26	7948.23	8108.75	7863.52	7664.09	7741.58	7745.02
sp|O43493-7|TGON2_HUMAN	TGOLN2	Isoform 7 of Trans-Golgi network integral membrane protein 2	18	1926.77	1918.63	1974.46	1104.22	1072.89	1085.31	1852.67	1856.99	1925.26
sp|P84090|ERH_HUMAN	ERH	Enhancer of rudimentary homolog	16	3523.29	3578.43	3554.09	3535.28	3535.26	3426.49	3469.44	3497.35	3519.06
sp|P52948|NUP98_HUMAN	NUP98	Nuclear pore complex protein Nup98-Nup96	98	12962.1	13138.7	12977	12853.2	13001.4	12970	12874.9	12931.9	12941.6
sp|Q7Z417|NUFP2_HUMAN	NUFIP2	Nuclear fragile X mental retardation-interacting protein 2	30	2596.95	2581.77	2535.64	2724.97	2710.75	2733.15	2533.39	2516.14	2501.98
sp|Q96KQ7|EHMT2_HUMAN	EHMT2	Histone-lysine N-methyltransferase EHMT2	14	1558.32	1575.16	1536.41	1565.88	1532.46	1536.21	1473.38	1511.42	1445.95
sp|Q9H9B1|EHMT1_HUMAN	EHMT1	Histone-lysine N-methyltransferase EHMT1	19	2396.67	2426.14	2421.41	2473.72	2541.92	2428.31	2409.46	2399.32	2421.8
sp|P27487|DPP4_HUMAN	DPP4	Dipeptidyl peptidase 4	65	549.338	570.584	897.931	850.534	811.849	786.526	822.6	846.82	821.429
sp|O75165|DJC13_HUMAN	DNAJC13	DnaJ homolog subfamily C member 13	98	11261	11205	11277.6	11015	11166.5	10917.6	11097.1	11041.9	11071
sp|Q14669-2|TRIPC_HUMAN	TRIP12	Isoform 2 of E3 ubiquitin-protein ligase TRIP12	2	91.8605	91.2353	97.1853	93.1598	97.0228	109.569	89.4376	87.775	97.7007
sp|Q14669-3|TRIPC_HUMAN	TRIP12	Isoform 3 of E3 ubiquitin-protein ligase TRIP12	76	6412.23	6550.77	6479.43	6986.74	6865.28	6943.04	6672.96	6778.61	6779.54
sp|O00214-2|LEG8_HUMAN	LGALS8	Isoform 2 of Galectin-8	14	698.626	713.424	725.978	799.423	766.086	763.859	713.071	686.418	667.814
sp|Q9P2R3-4|ANFY1_HUMAN	ANKFY1	Isoform 4 of Rabankyrin-5	47	4124.93	4119.69	4108.62	4223.4	4197.21	4139.5	4096.47	4239.99	4197.52
sp|O75155|CAND2_HUMAN	CAND2	Cullin-associated NEDD8-dissociated protein 2	16	2350.64	2342.28	2270.49	2219.14	2199.85	2317.58	2344.33	2342.68	2404.25
sp|Q86VP6|CAND1_HUMAN	CAND1	Cullin-associated NEDD8-dissociated protein 1	139	19400.7	19377.6	19580.3	19034.7	18891.6	18822.4	19695.6	19537.3	19367.4
sp|P24386|RAE1_HUMAN	CHM	Rab proteins geranylgeranyltransferase component A 1	14	1176.2	1192.75	1164.1	1131.19	1202.5	1129.42	1195.94	1193.82	1197.99
sp|P26374|RAE2_HUMAN	CHML	Rab proteins geranylgeranyltransferase component A 2	29	5897.33	5805.64	5700.87	5930.86	6029.41	5881.04	5891.21	5922.77	5975.41
sp|Q9P2E5|CHPF2_HUMAN	CHPF2	Chondroitin sulfate glucuronyltransferase	12	853.156	844.781	836.297	916.894	902.025	877.6	907.346	921.9	941.022
sp|O00458|IFRD1_HUMAN	IFRD1	Interferon-related developmental regulator 1	8	411.812	390.586	403.54	341.94	337.025	325.454	471.86	467.244	512.202
sp|Q08945|SSRP1_HUMAN	SSRP1	FACT complex subunit SSRP1	91	11987.3	11953.6	11750.2	11659.8	11615.8	11556.3	12125.2	11976.9	11919.5
sp|Q8IVT5|KSR1_HUMAN	KSR1	Kinase suppressor of Ras 1	7	688.006	724.887	726.281	676.108	693.565	679.635	632.928	650.148	655.003
sp|Q92542|NICA_HUMAN	NCSTN	Nicastrin	17	2434.79	2377.8	2449.94	2076.29	2115.48	2103.42	2279.56	2218.26	2248.47
sp|Q9P275|UBP36_HUMAN	USP36	Ubiquitin carboxyl-terminal hydrolase 36	26	2015.78	1967.74	1927.82	2083.49	2111.9	2056.16	1979.58	1978.46	1985.71
sp|P04040|CATA_HUMAN	CAT	Catalase	70	4858.59	4855.83	5176.78	5310.79	5284.96	5256.96	5170.72	5204.96	5135.62
sp|O60841|IF2P_HUMAN	EIF5B	Eukaryotic translation initiation factor 5B	83	11979.8	11993.4	12165.1	12396.2	12305.2	12408.7	12274.2	12124.1	12187.7
sp|O75179|ANR17_HUMAN	ANKRD17	Ankyrin repeat domain-containing protein 17	54	4863.08	4900.02	4883.18	4896.04	4908.28	4924.25	4631.22	4728.55	4703.23
sp|P50749|RASF2_HUMAN	RASSF2	Ras association domain-containing protein 2	2	124.107	110.151	115.486	121.107	118.491	117.557	110.846	131.338	111.298
sp|Q8IWZ3-6|ANKH1_HUMAN	ANKHD1	Isoform 6 of Ankyrin repeat and KH domain-containing protein 1	26	2917.26	3002.3	2916.63	2960.19	3054.64	2976.97	2819.55	2818.05	2839.59
sp|Q9H2L5|RASF4_HUMAN	RASSF4	Ras association domain-containing protein 4	4	121.051	108.291	137.271	122.645	147.124	117.992	118.596	113.687	126.749
tr|D6RHC4|D6RHC4_HUMAN	ANKHD1	Ankyrin repeat and KH domain-containing protein 1 (Fragment)	1	32.9865	37.365	47.0769	42.2085	46.5165	35.4791	35.9215	42.5362	38.3028
sp|O00423-3|EMAL1_HUMAN	EML1	Isoform 3 of Echinoderm microtubule-associated protein-like 1	22	3238.71	3161.54	3114.81	3072.67	3124.23	3073.84	3139.46	3167.3	3164.52
sp|O95834-3|EMAL2_HUMAN	EML2	Isoform 3 of Echinoderm microtubule-associated protein-like 2	5	269.521	287.718	289.749	268.57	268.706	254.913	270.975	262.529	256.822
sp|Q05BV3-5|EMAL5_HUMAN	EML5	Isoform 5 of Echinoderm microtubule-associated protein-like 5	8	902.363	860.326	906.798	819.176	819.334	808.22	841.945	862.35	849.824
sp|Q6ZMW3|EMAL6_HUMAN	EML6	Echinoderm microtubule-associated protein-like 6	1	32.0122	27.6431	28.4878	29.6821	29.5334	20.8691	23.9929	21.7466	22.4725
sp|Q9ULL5|PRR12_HUMAN	PRR12	Proline-rich protein 12	27	1631.38	1629.46	1632.32	1498.96	1516.07	1522	1473.53	1485.67	1505.67
sp|O14578-4|CTRO_HUMAN	CIT	Isoform 4 of Citron Rho-interacting kinase	55	4038.22	4007.73	4006.89	3855.66	3854.02	3908.07	3787.73	3790.38	3806.59
sp|Q14146|URB2_HUMAN	URB2	Unhealthy ribosome biogenesis protein 2 homolog	31	2397.37	2402.27	2434.48	2427.6	2357.47	2376.96	2357.27	2417.6	2402.03
sp|P11137|MTAP2_HUMAN	MAP2	Microtubule-associated protein 2	110	32907.9	32759.5	32188.2	33397.8	33429.1	33480	32029.1	32176.3	32518.6
sp|P11137-4|MTAP2_HUMAN	MAP2	Isoform 4 of Microtubule-associated protein 2	2	402.63	399.586	385.2	395.677	387.579	390.996	408.209	401.872	391.807
sp|Q13263|TIF1B_HUMAN	TRIM28	Transcription intermediary factor 1-beta	143	20633.2	20721.7	20694.4	20656.9	20429.7	20361	20034.5	20186	20298.7
sp|Q9GZR7|DDX24_HUMAN	DDX24	ATP-dependent RNA helicase DDX24	63	8199.65	8189.72	8197.67	9420.6	9456.76	9381.71	9233.26	9221.2	9277.47
sp|Q9Y6Q9|NCOA3_HUMAN	NCOA3	Nuclear receptor coactivator 3	13	666.86	651.039	646.087	651.514	677.709	682.814	614.264	623.867	592.108
sp|Q8IXM2-3|BAP18_HUMAN	BAP18	Isoform 3 of Chromatin complexes subunit BAP18	18	1515.34	1558.83	1541.84	1320.27	1349.16	1380.84	1389.31	1475.86	1414.42
sp|P41214|EIF2D_HUMAN	EIF2D	Eukaryotic translation initiation factor 2D	37	3032.94	3045.55	3065.66	3020.67	3033.93	3001.64	3073.15	3131.1	3111.71
sp|Q9H6T0-2|ESRP2_HUMAN	ESRP2	Isoform 2 of Epithelial splicing regulatory protein 2	7	22.0707	20.4837	34.7822	38.7152	42.8314	37.6568	32.9414	38.126	33.8598
sp|Q9UK73|FEM1B_HUMAN	FEM1B	Protein fem-1 homolog B	14	1223.49	1220.82	1182.5	1152.61	1169.1	1172.9	1155.5	1149.53	1143
sp|Q96RS0|TGS1_HUMAN	TGS1	Trimethylguanosine synthase	19	2517.54	2505.9	2435.34	2358.41	2360.98	2405.62	2381.55	2416.83	2339.14
sp|Q9HAW4|CLSPN_HUMAN	CLSPN	Claspin	15	1581.97	1647.1	1600.9	1625.71	1597.29	1670.81	1406.72	1469.15	1475.21
sp|Q9H300|PARL_HUMAN	PARL	Presenilins-associated rhomboid-like protein, mitochondrial	4	616.053	585.354	614.076	566.312	551.608	511.25	567.932	594.904	576.518
sp|P08243|ASNS_HUMAN	ASNS	Asparagine synthetase [glutamine-hydrolyzing]	60	10191	10175.8	9834.66	9441.71	9481.48	9358.33	10424.1	10461	10418.1
sp|Q9P2Z0|THA10_HUMAN	THAP10	THAP domain-containing protein 10	1	129.952	144.186	150.202	119.816	124.695	128.754	138.949	130.117	125.467
sp|Q9H496|IFG15_HUMAN	TOR1AIP2	Torsin-1A-interacting protein 2, isoform IFRG15	2	135.532	129.033	123.543	103.659	115.093	103.249	110.998	119.836	121.076
sp|Q02224|CENPE_HUMAN	CENPE	Centromere-associated protein E	15	1345.38	1363.82	1288.5	1441.87	1454.01	1462.6	1221.94	1223.55	1182.85
sp|Q96HJ9|FMC1_HUMAN	FMC1	Protein FMC1 homolog	3	1489.38	1487.86	1463.07	1313.56	1313.12	1366.72	1392.45	1407.59	1427.85
sp|Q9NQ29|LUC7L_HUMAN	LUC7L	Putative RNA-binding protein Luc7-like 1	17	1319.22	1332.05	1343.03	1415.18	1385.86	1377.63	1320.32	1390.47	1359.19
sp|Q9Y383|LC7L2_HUMAN	LUC7L2	Putative RNA-binding protein Luc7-like 2	40	7408.94	7252.45	7247.17	7042.45	7278.45	7069	7206.39	7003.83	7134.24
sp|Q96IF1|AJUBA_HUMAN	AJUBA	LIM domain-containing protein ajuba	15	177.149	174.068	205.424	206.661	207.535	195.663	196.399	213.499	213.46
sp|Q9UGP4|LIMD1_HUMAN	LIMD1	LIM domain-containing protein 1	21	1666.1	1576.64	1527.15	1587.86	1560.31	1523.29	1451.21	1412.57	1500.58
sp|P29375|KDM5A_HUMAN	KDM5A	Lysine-specific demethylase 5A	22	1324.38	1354.54	1313.13	1328.91	1363.25	1367.01	1317.81	1348.11	1326.63
sp|P41229|KDM5C_HUMAN	KDM5C	Lysine-specific demethylase 5C	24	2104.05	2015.35	2090.88	2155.58	2076.99	2050.92	2020.63	2080.26	1979.11
sp|Q9BY66-3|KDM5D_HUMAN	KDM5D	Isoform 3 of Lysine-specific demethylase 5D	14	1260.1	1273.87	1291.66	1258.27	1268.85	1263.96	1227.93	1189.74	1193.83
sp|Q9UGL1-2|KDM5B_HUMAN	KDM5B	Isoform 2 of Lysine-specific demethylase 5B	5	551.094	567.963	551.008	520.761	516.446	513.922	523.771	557.722	542.942
sp|Q96RU3-2|FNBP1_HUMAN	FNBP1	Isoform 2 of Formin-binding protein 1	30	4760.53	4598.51	4694.63	4558.11	4652.97	4630.07	4605.74	4598.4	4523.5
sp|Q9NUD5|ZCHC3_HUMAN	ZCCHC3	Zinc finger CCHC domain-containing protein 3	41	3192.88	3181.9	3370.09	3236.49	3290.07	3336.39	3282.24	3254.73	3235.32
sp|Q9P2W1|HOP2_HUMAN	PSMC3IP	Homologous-pairing protein 2 homolog	11	2659.79	2731.27	2639.11	2551.74	2607.85	2570.99	2691.56	2726.56	2737.11
sp|O15439|MRP4_HUMAN	ABCC4	Multidrug resistance-associated protein 4	27	2480.59	2550.92	2520.71	2451.02	2392.95	2507.36	2537.81	2530.64	2493.57
sp|O43633|CHM2A_HUMAN	CHMP2A	Charged multivesicular body protein 2a	18	4323.65	4457.46	4224.14	4436.85	4552.43	4539.07	4537.67	4605.55	4552.01
sp|O60220|TIM8A_HUMAN	TIMM8A	Mitochondrial import inner membrane translocase subunit Tim8 A	2	177.422	161.325	183.403	138.348	138.567	144.4	136.038	139.728	135.966
sp|Q6NS38|ALKB2_HUMAN	ALKBH2	DNA oxidative demethylase ALKBH2	4	576.206	579.635	582.741	603.558	598.742	572.994	596.662	633.001	616.25
sp|Q9HAU8|RNPL1_HUMAN	RNPEPL1	Aminopeptidase RNPEPL1	6	113.089	103.925	106.883	90.5154	97.5149	95.1835	97.7248	96.3908	100.496
sp|O95081|AGFG2_HUMAN	AGFG2	Arf-GAP domain and FG repeat-containing protein 2	8	319.842	311.567	399.374	379.688	366.899	381.481	363.775	358.613	368.33
sp|Q7Z7A1|CNTRL_HUMAN	CNTRL	Centriolin	11	772.356	776.137	753.427	793.176	817.712	786.437	1108.91	1137.42	1085.05
sp|Q9NUP1|BL1S4_HUMAN	BLOC1S4	Biogenesis of lysosome-related organelles complex 1 subunit 4	9	293.171	291.735	285.374	278.901	284.036	252.605	261.738	258.766	265.088
sp|Q5T7V8|GORAB_HUMAN	GORAB	RAB6-interacting golgin	9	705.722	752.164	714.637	732.645	734.912	727.806	675.144	697.177	708.729
sp|Q9Y6G5|COMDA_HUMAN	COMMD10	COMM domain-containing protein 10	12	621.098	601.29	609.367	593.476	610.709	569.828	598.296	621.876	596.351
sp|Q96AY2-2|EME1_HUMAN	EME1	Isoform 2 of Crossover junction endonuclease EME1	11	2203.62	2219.09	2163.81	1999.34	2049.83	2047.27	2170.48	2074.46	2131.24
sp|Q5H9R4|ARMX4_HUMAN	ARMCX4	Armadillo repeat-containing X-linked protein 4	2	373.627	385.487	348.571	416.178	410.694	406.597	373.857	354.718	365.571
sp|Q13686|ALKB1_HUMAN	ALKBH1	Nucleic acid dioxygenase ALKBH1	7	382.84	361.396	379.355	332.416	339.7	364.836	338.32	361.687	353.184
sp|Q9NR77|PXMP2_HUMAN	PXMP2	Peroxisomal membrane protein 2	7	425.408	432.832	420.077	394.538	410.762	423.337	432.056	419.846	411.249
sp|Q99996-6|AKAP9_HUMAN	AKAP9	Isoform 6 of A-kinase anchor protein 9	135	20790.2	20867.2	20840.4	19785	19901.6	19980.8	20121.5	20148.4	20214.3
sp|Q5VWN6|TASO2_HUMAN	TASOR2	Protein TASOR 2	34	4590.99	4582.25	4511.14	4527.66	4469.14	4570.78	4389.57	4492.71	4496.83
sp|O75190|DNJB6_HUMAN	DNAJB6	DnaJ homolog subfamily B member 6	10	806.405	818.234	803.515	805.396	822.59	799.873	784.137	770.739	784.352
sp|P25686|DNJB2_HUMAN	DNAJB2	DnaJ homolog subfamily B member 2	6	135.315	133.796	122.192	145.003	171.371	159.212	136.606	126.015	135.578
sp|Q6L8Q7|PDE12_HUMAN	PDE12	2',5'-phosphodiesterase 12	46	5000.14	4945.48	4868.98	4851.09	4882.87	4892.57	4840.66	4898.34	4838.57
sp|Q8TC07-2|TBC15_HUMAN	TBC1D15	Isoform 2 of TBC1 domain family member 15	35	6934.03	6901.36	6910.69	6783.13	6882.66	6945.43	6898.43	6967.96	7020.8
sp|P82933|RT09_HUMAN	MRPS9	28S ribosomal protein S9, mitochondrial	44	5968.58	6031.68	6072.53	5870.35	5754.33	5753.25	5741.81	5816.65	5711.72
sp|Q9NVT9|ARMC1_HUMAN	ARMC1	Armadillo repeat-containing protein 1	21	3592.23	3647.53	3648.18	3602.88	3459.44	3491.4	3523.97	3565.91	3622.71
sp|Q9UJX4|APC5_HUMAN	ANAPC5	Anaphase-promoting complex subunit 5	27	2394.4	2379.69	2374.24	2273.59	2330.24	2330.82	2406.57	2381	2420.24
sp|O43502|RA51C_HUMAN	RAD51C	DNA repair protein RAD51 homolog 3	6	824.71	840.534	832.484	729.779	788.682	749.005	791.903	804.135	833.928
sp|Q9BPX7-2|CG025_HUMAN	C7orf25	Isoform 2 of UPF0415 protein C7orf25	6	766.16	757.053	725.593	664.149	711.002	695.37	734.096	742.01	741.538
sp|Q52LR7|EPC2_HUMAN	EPC2	Enhancer of polycomb homolog 2	9	526.112	525.449	520.697	508.089	507.189	522.257	486.693	494.397	486.685
sp|Q9H583|HEAT1_HUMAN	HEATR1	HEAT repeat-containing protein 1	118	14191.2	14129.8	14362.6	14935.5	14761.3	14875.5	14553.5	14453.3	14422.5
sp|P23229|ITA6_HUMAN	ITGA6	Integrin alpha-6	49	1054.4	1048.9	1229.5	1208.77	1197.46	1191.27	1166.51	1172.85	1150.12
sp|Q8TDG4|HELQ_HUMAN	HELQ	Helicase POLQ-like	1	16.9274	15.1509	13.2539	21.3641	16.6278	13.1513	7.03672	12.1119	11.9621
sp|Q9Y6W3|CAN7_HUMAN	CAPN7	Calpain-7	38	2980.78	3018.83	3094.4	2920.93	2921.1	2994.37	3037.02	3015.2	3035.25
sp|Q9NX76|CKLF6_HUMAN	CMTM6	CKLF-like MARVEL transmembrane domain-containing protein 6	2	262.508	255.264	274.973	331.65	352.064	352.473	320.064	300.696	290.68
sp|Q86XZ4|SPAS2_HUMAN	SPATS2	Spermatogenesis-associated serine-rich protein 2	17	3115.03	3089.74	3030.96	3074.85	3066.45	3140.19	2906.78	2936.6	2983.44
sp|Q96GV9|CE030_HUMAN	C5orf30	UNC119-binding protein C5orf30	6	829.755	827.964	782.37	754.232	698.255	741.175	585.782	586.391	573.488
sp|Q8NC44|RETR2_HUMAN	RETREG2	Reticulophagy regulator 2	7	757.692	758.385	761.189	801.86	850.725	818.483	790.949	801.978	813.39
sp|Q9UEG4|ZN629_HUMAN	ZNF629	Zinc finger protein 629	20	2063.2	2129.22	2102.28	1998.65	2126.8	2031.21	1933.8	1966.26	1972.12
sp|Q9BY89|K1671_HUMAN	KIAA1671	Uncharacterized protein KIAA1671	23	1422.67	1425.15	1406.09	1337.95	1346.02	1355.06	1288.48	1229.2	1282.77
sp|Q9BWG6|SCNM1_HUMAN	SCNM1	Sodium channel modifier 1	4	94.4955	103.85	123.35	98.0146	107.744	100.812	102.387	107.951	99.6445
sp|Q8TEM1|PO210_HUMAN	NUP210	Nuclear pore membrane glycoprotein 210	66	6746.58	6826.55	6836.27	7143.61	7167.82	7129.82	7500.08	7583.08	7450.54
sp|P00505|AATM_HUMAN	GOT2	Aspartate aminotransferase, mitochondrial	73	11136.3	11241.1	11146.7	11418.9	11367.4	11374.6	10841.6	10769.1	10605.7
sp|Q9UQR1|ZN148_HUMAN	ZNF148	Zinc finger protein 148	19	1333.31	1414.47	1360.43	1362.24	1376	1357.22	1299.4	1277.84	1319.73
sp|Q66PJ3-2|AR6P4_HUMAN	ARL6IP4	Isoform 2 of ADP-ribosylation factor-like protein 6-interacting protein 4	3	607.431	600.664	597.049	579.698	564.964	621.671	548.298	567.947	520.039
sp|Q9BW92|SYTM_HUMAN	TARS2	Threonine--tRNA ligase, mitochondrial	43	5050.45	5077.1	5018.61	4444.13	4518.98	4542.36	4951.82	4978.79	5075.92
sp|P41226|UBA7_HUMAN	UBA7	Ubiquitin-like modifier-activating enzyme 7	12	289.965	281.365	318.052	261.932	278.702	270.699	320.256	314.027	288.538
sp|Q02790|FKBP4_HUMAN	FKBP4	Peptidyl-prolyl cis-trans isomerase FKBP4	103	25070.7	25059	24695.6	26162.9	26233	26083.2	25045.5	24707	24829.2
sp|O95721|SNP29_HUMAN	SNAP29	Synaptosomal-associated protein 29	21	2198.3	2182.62	2113.82	2200.29	2273.05	2203.81	1989.24	2063.63	2042.2
sp|Q9BT67|NFIP1_HUMAN	NDFIP1	NEDD4 family-interacting protein 1	4	118.807	131.573	118.314	166.09	181.388	166.575	133.964	140.677	137.234
sp|Q9UGU5|HMGX4_HUMAN	HMGXB4	HMG domain-containing protein 4	8	577.095	566.558	577.585	549.271	563.168	510.567	568.438	541.756	546.489
sp|O00461|GOLI4_HUMAN	GOLIM4	Golgi integral membrane protein 4	33	5797.76	5871.64	5764.93	6068.4	5976.18	6139.63	5750.22	5881.21	5785.27
tr|F8W785|F8W785_HUMAN	GOLIM4	Golgi integral membrane protein 4	1	14.1317	14.7918	12.8368	17.6404	20.6463	20.1525	15.4126	11.6477	16.8337
sp|Q14566|MCM6_HUMAN	MCM6	DNA replication licensing factor MCM6	102	20482.9	20497.3	20304.2	19882.2	20120.1	19984.3	21014.4	20946	21273
sp|Q08999|RBL2_HUMAN	RBL2	Retinoblastoma-like protein 2	6	179.227	179.248	169.855	157.494	161.202	164.935	166.918	172.486	166.948
sp|Q9UPX0-2|TUTLB_HUMAN	IGSF9B	Isoform 2 of Protein turtle homolog B	2	44.8617	46.2728	42.418	35.0914	46.6054	36.9683	38.2369	37.5175	35.2195
sp|Q9BUJ2|HNRL1_HUMAN	HNRNPUL1	Heterogeneous nuclear ribonucleoprotein U-like protein 1	15	1868.84	1821.12	1834.91	1815.68	1813.01	1746.65	1667.2	1691.87	1695.67
sp|P14543|NID1_HUMAN	NID1	Nidogen-1	45	969.472	1024.89	1217.82	1085.31	1077.36	1073.82	1157.65	1126.8	1135.05
sp|Q14149|MORC3_HUMAN	MORC3	MORC family CW-type zinc finger protein 3	51	5731.06	5884.09	5848.83	6002.57	5951.18	5862.44	5828.72	5882.26	5925.24
sp|Q06546|GABPA_HUMAN	GABPA	GA-binding protein alpha chain	33	4949.34	4917.56	4876.73	4950.68	5040.15	4917.18	4994.29	5012.64	4977.38
sp|P0DP91|ERPG3_HUMAN	ERCC6	Chimeric ERCC6-PGBD3 protein	1	13.0609	19.1965	18.0331	15.2568	16.3061	20.5496	17.7528	18.486	17.5445
sp|Q03468|ERCC6_HUMAN	ERCC6	DNA excision repair protein ERCC-6	7	735.09	711.351	755.819	751.192	746.612	735.34	711.453	737.405	718.466
sp|Q9P0K7-2|RAI14_HUMAN	RAI14	Isoform 2 of Ankycorbin	40	3875.42	3898.21	3881.98	3981.85	3999.46	3999.96	3799.42	3843.3	3824.2
sp|P17677-2|NEUM_HUMAN	GAP43	Isoform 2 of Neuromodulin	26	9033.14	8931.77	8912.48	9518.09	9627.48	9676.78	9451.6	9361.33	9677.16
sp|Q96ME1-4|FXL18_HUMAN	FBXL18	Isoform 4 of F-box/LRR-repeat protein 18	32	5114.84	5012.18	4966.55	4928.22	4850.45	4920.63	5158.62	5107.52	5151.64
sp|P69849|NOMO3_HUMAN	NOMO3	Nodal modulator 3	22	2691.66	2639.06	2669.85	3491.36	3391.45	3386.62	3117.91	3176.7	3130.41
sp|Q15155|NOMO1_HUMAN	NOMO1	Nodal modulator 1	1	476.121	475.819	486.056	642.52	657.846	681.05	558.297	596.42	546.04
sp|Q86V48|LUZP1_HUMAN	LUZP1	Leucine zipper protein 1	41	3893.78	3865.59	3830.08	3859.17	3952.3	3920.79	3685.73	3760.91	3680.06
sp|P04818|TYSY_HUMAN	TYMS	Thymidylate synthase	28	2906.36	2947.96	2938.09	3137.11	3115.05	3112.29	3001.32	2970.18	2934.36
sp|O75347|TBCA_HUMAN	TBCA	Tubulin-specific chaperone A	15	3414.12	3468.31	3429.32	3402.75	3426.9	3397.15	3595.41	3570.93	3541.88
sp|O75347-2|TBCA_HUMAN	TBCA	Isoform 2 of Tubulin-specific chaperone A	23	4662.39	4779.96	4691.08	4771.06	4724.99	4671.74	4879.98	4810.25	4808.16
sp|P30039|PBLD_HUMAN	PBLD	Phenazine biosynthesis-like domain-containing protein	5	236.486	216.58	226.584	195.584	175.98	192.466	202.97	216.349	203.887
sp|P07355-2|ANXA2_HUMAN	ANXA2	Isoform 2 of Annexin A2	36	7427.16	7645.73	7266.27	7396.68	7555.63	7672.51	7713.53	7732.05	7538.6
sp|Q53EP0|FND3B_HUMAN	FNDC3B	Fibronectin type III domain-containing protein 3B	45	1837.15	1870.75	2004.43	2151.41	2131.7	2119.2	2157.74	2231.58	2215.81
sp|P19823|ITIH2_HUMAN	ITIH2	Inter-alpha-trypsin inhibitor heavy chain H2	92	906.985	918.097	1361.45	1286.88	1267.75	1239.81	1257.83	1224.33	1245.07
sp|O95671|ASML_HUMAN	ASMTL	Probable bifunctional dTTP/UTP pyrophosphatase/methyltransferase protein	13	1026.29	1016.6	1055.5	974.762	917.032	980.655	1018.67	1034.25	997.825
sp|P12004|PCNA_HUMAN	PCNA	Proliferating cell nuclear antigen	83	7443.62	7446.51	7483.87	7545.82	7314.81	7510.98	7703.85	7635.94	7540.17
sp|O43237|DC1L2_HUMAN	DYNC1LI2	Cytoplasmic dynein 1 light intermediate chain 2	45	8365.13	8392.02	8307.79	8516.75	8513.97	8568.7	8183.9	7974.24	8008.28
sp|Q9Y6G9|DC1L1_HUMAN	DYNC1LI1	Cytoplasmic dynein 1 light intermediate chain 1	80	16477.9	16005.1	16046	16258.2	16223.1	16078.5	16024.9	15925.6	15766.2
sp|Q86U86|PB1_HUMAN	PBRM1	Protein polybromo-1	86	19622.4	19443	19302.8	19188.3	19634.2	19556.7	19515.7	19420.6	19510.1
sp|Q68CP9|ARID2_HUMAN	ARID2	AT-rich interactive domain-containing protein 2	54	8443.22	8494.14	8313.55	8508.23	8435.68	8552.65	8383.89	8429.12	8463.42
sp|Q3T8J9|GON4L_HUMAN	GON4L	GON-4-like protein	28	2372.74	2409.87	2401.41	2310.45	2207.25	2268.24	2255.05	2284.02	2289.07
sp|Q9H869-9|YYAP1_HUMAN	YY1AP1	Isoform 9 of YY1-associated protein 1	1	65.4069	56.1215	61.3654	51.1477	58.8146	63.6031	67.8812	59.5353	58.6745
sp|O76075|DFFB_HUMAN	DFFB	DNA fragmentation factor subunit beta	3	96.0648	101.841	84.33	97.5421	99.365	90.5698	98.3166	110.137	102.586
sp|Q9Y639|NPTN_HUMAN	NPTN	Neuroplastin	11	750.977	742.386	789.462	850.528	826.129	821.589	826.315	842.474	834.074
sp|P49356|FNTB_HUMAN	FNTB	Protein farnesyltransferase subunit beta	8	698.831	663.588	648.885	708.845	662.052	692.491	669.256	659.964	651.204
sp|Q8WUH1-2|CHUR_HUMAN	CHURC1	Isoform 2 of Protein Churchill	3	164.654	167.486	167.175	182.653	177.392	174.672	166.523	181.505	176.252
tr|B4DL54|B4DL54_HUMAN	CHURC1-FNTB	Protein farnesyltransferase subunit beta	2	335.712	306.001	307.739	336.407	335.316	336.322	356.366	323.976	337.876
sp|Q5TAP6|UT14C_HUMAN	UTP14C	U3 small nucleolar RNA-associated protein 14 homolog C	3	12.7837	23.0362	16.9656	15.7718	9.81945	12.8467	15.3795	15.6536	15.7257
sp|Q9BVJ6|UT14A_HUMAN	UTP14A	U3 small nucleolar RNA-associated protein 14 homolog A	67	10805.4	10797.9	10531.2	11271.9	11168.7	11124	10443.8	10396.2	10387
sp|Q02241|KIF23_HUMAN	KIF23	Kinesin-like protein KIF23	25	2748.7	2801.22	2760.45	2788.2	2855.55	2791.89	2664.49	2674.16	2645.95
sp|Q6P1M3|L2GL2_HUMAN	LLGL2	LLGL scribble cell polarity complex component 2	25	703.197	679.711	759.061	780.535	786.586	782.299	699.187	729.229	714.908
sp|Q9HBH5|RDH14_HUMAN	RDH14	Retinol dehydrogenase 14	20	2151.62	2106.46	2127.75	2251.15	2227.22	2223.09	2292.9	2357.84	2404.26
sp|Q96QC0|PP1RA_HUMAN	PPP1R10	Serine/threonine-protein phosphatase 1 regulatory subunit 10	41	5608.32	5545.98	5676.3	5523.11	5611.52	5581.91	5513.03	5450.31	5461.58
sp|Q96K58-2|ZN668_HUMAN	ZNF668	Isoform 2 of Zinc finger protein 668	12	764.504	778.131	765.098	763.582	759.865	770.491	717.316	757.84	744.56
sp|O15031|PLXB2_HUMAN	PLXNB2	Plexin-B2	67	5353	5281.75	5240.08	5867.84	5693.12	5753.59	5237.94	5215.88	5283.29
sp|Q7Z6V5|ADAT2_HUMAN	ADAT2	tRNA-specific adenosine deaminase 2	5	388.876	403.284	394.168	385.358	385.969	390.208	388.634	373.299	403.602
sp|Q9HCE6|ARGAL_HUMAN	ARHGEF10L	Rho guanine nucleotide exchange factor 10-like protein	36	729.55	739.088	820.113	794.439	775.43	769.273	795.621	797.427	779.092
sp|Q9UJU6|DBNL_HUMAN	DBNL	Drebrin-like protein	1	27.885	23.3163	21.6796	18.396	23	21.5471	19.7743	21.4224	17.0325
sp|Q9UJU6-3|DBNL_HUMAN	DBNL	Isoform 3 of Drebrin-like protein	36	6758.61	6819.67	6605.15	6505.3	6413.45	6439.76	6374.02	6435.12	6496.11
sp|P36543|VATE1_HUMAN	ATP6V1E1	V-type proton ATPase subunit E 1	22	2480.12	2473.66	2455.51	2546.45	2542.01	2527.7	2460.54	2482.27	2457.18
sp|Q96A05|VATE2_HUMAN	ATP6V1E2	V-type proton ATPase subunit E 2	11	2056.52	2160.91	2066.49	2130.04	2052.31	2017.68	2032.85	2083.63	2090.16
sp|Q7L3B6|CD37L_HUMAN	CDC37L1	Hsp90 co-chaperone Cdc37-like 1	16	2145.4	2187.32	2147.36	2092.2	2066.67	2161.32	2116.6	2029.08	2010.17
sp|O00425|IF2B3_HUMAN	IGF2BP3	Insulin-like growth factor 2 mRNA-binding protein 3	66	8811.41	8856.51	8864.42	8768.72	8702.03	8687.53	8749.14	8838.88	8741.13
sp|Q9NZI8|IF2B1_HUMAN	IGF2BP1	Insulin-like growth factor 2 mRNA-binding protein 1	71	596.989	663.672	984.151	873.957	886.82	876.997	871.9	919.487	940.545
sp|Q9Y6M1|IF2B2_HUMAN	IGF2BP2	Insulin-like growth factor 2 mRNA-binding protein 2	55	1645.82	1592.86	1899.98	1804.64	1806.51	1819.65	1866.28	1800.5	1827.71
sp|Q9H173|SIL1_HUMAN	SIL1	Nucleotide exchange factor SIL1	8	694.199	698.534	699.507	698.8	690.412	703.843	858.96	868.194	854.245
sp|Q9NUS5|AP5S1_HUMAN	AP5S1	AP-5 complex subunit sigma-1	3	71.435	67.5106	58.1993	51.9414	53.5778	55.2948	61.9566	64.7952	56.0931
sp|Q9UQE7|SMC3_HUMAN	SMC3	Structural maintenance of chromosomes protein 3	98	17608.1	17838	17377	17645.2	17799.8	17628.6	17711.9	17525.7	17616.7
sp|Q96T17-2|MA7D2_HUMAN	MAP7D2	Isoform 2 of MAP7 domain-containing protein 2	14	1211.26	1209.12	1178.23	1153.81	1131.57	1113.54	1110.67	1105.26	1147.34
sp|Q4L180|FIL1L_HUMAN	FILIP1L	Filamin A-interacting protein 1-like	11	393.128	434.595	448.652	429.169	430.663	439.266	465.062	429.814	433.296
sp|Q8N0X7|SPART_HUMAN	SPART	Spartin	16	2190.03	2258.63	2193.67	2324.03	2260.78	2288.2	2053.8	2049.57	2015.99
sp|Q15811|ITSN1_HUMAN	ITSN1	Intersectin-1	42	5201.91	5177.87	5166.34	4985.22	4996.85	4933.94	5131.63	5173.92	5156.89
sp|Q15811-7|ITSN1_HUMAN	ITSN1	Isoform 7 of Intersectin-1	3	190.196	202.337	209.233	184.579	207.98	200.145	189.626	188.783	200.768
sp|Q9NZM3|ITSN2_HUMAN	ITSN2	Intersectin-2	48	4721.14	4743.87	4732.6	4782.59	4751.67	4776.79	4693.49	4841.75	4730.01
sp|Q9UBB9|TFP11_HUMAN	TFIP11	Tuftelin-interacting protein 11	32	2864.76	2992.37	2925.5	2976.17	2962.77	2963.53	3012.1	2872.77	2990.7
sp|P49588|SYAC_HUMAN	AARS	Alanine--tRNA ligase, cytoplasmic	129	15067.5	14944.1	15415.2	15315.4	15244	15146.5	16362.6	16426.2	16353.7
sp|A2RRP1|NBAS_HUMAN	NBAS	Neuroblastoma-amplified sequence	77	6305.63	6416.17	6413.31	6388.24	6339.16	6403.62	6326	6464	6296.7
sp|P17480|UBF1_HUMAN	UBTF	Nucleolar transcription factor 1	67	12222	12181.7	12026	12609.8	12779.5	12590.2	12045.7	12188.8	12169
sp|P49662|CASP4_HUMAN	CASP4	Caspase-4	5	41.627	35	51.1103	48.709	45.7168	52.5868	46.9112	52.0892	42.8388
sp|P16157-14|ANK1_HUMAN	ANK1	Isoform Er13 of Ankyrin-1	1	97.8958	98.4941	96.0407	89.0397	87.351	100.048	87.9676	92.8493	89.8858
sp|Q01484|ANK2_HUMAN	ANK2	Ankyrin-2	19	2330.87	2317.81	2371.57	2245.88	2256.23	2266.84	2311.36	2381.32	2279.43
sp|Q12955|ANK3_HUMAN	ANK3	Ankyrin-3	4	578.451	564.071	572.185	654.036	672.005	637.876	608.761	649.51	634.117
sp|Q3V6T2-4|GRDN_HUMAN	CCDC88A	Isoform 4 of Girdin	17	2757.58	2736.69	2732.79	2804.69	2690.65	2697.16	2758.25	2771.54	2703.38
sp|Q86TU7|SETD3_HUMAN	SETD3	Actin-histidine N-methyltransferase	42	4230.27	4299.77	4200.93	4125.35	4183.72	4166.33	4172.2	4275.65	4275.06
sp|P09110|THIK_HUMAN	ACAA1	3-ketoacyl-CoA thiolase, peroxisomal	48	1919.29	1909.92	2050.1	2020.49	1991.96	2012.98	1984.26	2017.06	2024.91
sp|Q14257-2|RCN2_HUMAN	RCN2	Isoform 2 of Reticulocalbin-2	61	6269.85	6289.63	6305.85	6322.12	6318.38	6429.76	6557.96	6513.7	6496.85
sp|Q9NWT6|HIF1N_HUMAN	HIF1AN	Hypoxia-inducible factor 1-alpha inhibitor	12	850.979	820.86	827.821	798.224	802.929	796.896	798.823	803.288	804.223
sp|O00429-2|DNM1L_HUMAN	DNM1L	Isoform 4 of Dynamin-1-like protein	2	504.093	481.719	465.279	554.015	536.734	534.852	517.055	516.467	506.683
sp|O00429-6|DNM1L_HUMAN	DNM1L	Isoform 6 of Dynamin-1-like protein	86	13722.6	13660	13482.1	13791.3	13671.4	13697.1	14085.1	14006.8	14070.2
sp|Q969S3|ZN622_HUMAN	ZNF622	Zinc finger protein 622	32	4239.55	4193.24	4170.06	4225.77	4152.22	4250.28	4104.2	4157.63	4158.75
sp|Q96TC7|RMD3_HUMAN	RMDN3	Regulator of microtubule dynamics protein 3	19	1044.18	1077.33	1118.36	1122.44	1123.93	1119.61	1099.47	1139.26	1114.52
sp|Q24JP5-2|T132A_HUMAN	TMEM132A	Isoform 2 of Transmembrane protein 132A	1	48.9241	45.6058	44.3497	53.7679	52.8306	47.1586	49.3464	58.5348	44.5663
sp|Q9BYM8|HOIL1_HUMAN	RBCK1	RanBP-type and C3HC4-type zinc finger-containing protein 1	20	2091.51	2103.32	2107.63	1841.28	1894.01	1910.05	1947.52	2021.78	1969.58
sp|Q5SRH9|TT39A_HUMAN	TTC39A	Tetratricopeptide repeat protein 39A	1	26.5086	22.8805	19.8355	23.7325	21.735	24.5843	19.8611	24.0769	25.037
sp|Q587I9|SFT2C_HUMAN	SFT2D3	Vesicle transport protein SFT2C	6	389.49	356.378	378.214	428.131	411.749	382.508	347.036	328.075	370.542
tr|A0A494C0R8|A0A494C0R8_HUMAN	CLUH	Clustered mitochondria protein homolog	79	5176.02	5269.95	5411.63	5442.6	5474.18	5419.84	5439.48	5440.93	5467.82
sp|Q53GL0|PKHO1_HUMAN	PLEKHO1	Pleckstrin homology domain-containing family O member 1	7	1248.99	1212.07	1192.35	1843.88	1843.57	1827.65	1365.33	1391.77	1343.67
sp|Q8N5F7|NKAP_HUMAN	NKAP	NF-kappa-B-activating protein	7	1186.17	1193.12	1216.63	1248.97	1258.59	1273.91	1236.81	1240.51	1263.06
sp|Q14152|EIF3A_HUMAN	EIF3A	Eukaryotic translation initiation factor 3 subunit A	115	22058.7	22043.6	22060	22622.8	22684.5	22529.6	22933.1	22408.8	22514.9
sp|Q9NP74|PALMD_HUMAN	PALMD	Palmdelphin	21	261.417	308.115	372.273	354.419	355.391	365.093	332.933	366.86	368.909
sp|Q5VT06|CE350_HUMAN	CEP350	Centrosome-associated protein 350	26	2786.35	2819.87	2731.22	2655.49	2692.17	2681.75	2536.87	2577.07	2616.79
sp|Q86XL3|ANKL2_HUMAN	ANKLE2	Ankyrin repeat and LEM domain-containing protein 2	41	3840.41	3854.68	3901.31	3773.51	3695.13	3798.77	3678.77	3616.49	3665.58
sp|P11387|TOP1_HUMAN	TOP1	DNA topoisomerase 1	81	9719.47	9834.31	9813.48	11058.5	10990	10917.4	10969.4	11048.2	10948.9
sp|Q969P6|TOP1M_HUMAN	TOP1MT	DNA topoisomerase I, mitochondrial	1	41.9002	41.3066	39.4706	34.2111	37.2526	40.5422	40.0837	35.5427	36.0659
sp|Q8NBN3|TM87A_HUMAN	TMEM87A	Transmembrane protein 87A	19	2128.2	2105.56	2102.37	1616.62	1639.72	1637.47	1943.37	1985.27	1960.58
[truncated: 7,607 more rows]
