# Supplementary material for: Proteome-Wide Profiling Using Sample Multiplexing of a Human Cell Line Treated with Cannabidiol (CBD) and Tetrahydrocannabinol (THC)
Source: Proteomes. 2023 Nov 2;11(4):36. doi: 10.3390/proteomes11040036 (PMC10661330; doi:10.3390/proteomes11040036)
Supplement: Supplementary file 1 [file proteomes-11-00036-s001.zip › Abyadeh TableS2.xlsx]

## Sheet: DEPS-CBD format
Table S3: Differentially expressed proteins for CBD treatment. Columns include: Uniprot protein ID, gene name, protein description, the THC/MeOH ratio, and the associated p-value.
Protein ID	Gene Symbol	Description	CBD/MeOH	p-value
sp|P08910|ABHD2_HUMAN	ABHD2	Monoacylglycerol lipase ABHD2	7.9711	2.49347e-07
sp|P04279|SEMG1_HUMAN	SEMG1	Semenogelin-1	5.2582	0.00228567
sp|Q9H2A7|CXL16_HUMAN	CXCL16	C-X-C motif chemokine 16	4.11876	0.00689385
sp|P02795|MT2_HUMAN	MT2A	Metallothionein-2	3.00017	4.68191e-05
sp|Q8NCS4|TM35B_HUMAN	TMEM35B	Transmembrane protein 35B	2.38281	1.95988e-05
sp|Q8TEZ7|PAQR8_HUMAN	PAQR8	Membrane progestin receptor beta	2.25655	0.000697173
sp|P04035-3|HMDH_HUMAN	HMGCR	Isoform 3 of 3-hydroxy-3-methylglutaryl-coenzyme A reductase	2.02451	2.62912e-05
sp|Q99574|NEUS_HUMAN	SERPINI1	Neuroserpin	1.95515	0.000561559
sp|Q9C0H2-4|TTYH3_HUMAN	TTYH3	Isoform 4 of Protein tweety homolog 3	1.82958	4.94105e-07
sp|P55061-2|BI1_HUMAN	TMBIM6	Isoform 2 of Bax inhibitor 1	1.80603	0.00017961
sp|P02792|FRIL_HUMAN	FTL	Ferritin light chain	1.77072	8.12841e-07
sp|Q01628|IFM3_HUMAN	IFITM3	Interferon-induced transmembrane protein 3	1.74286	0.0324753
sp|P05107|ITB2_HUMAN	ITGB2	Integrin beta-2	1.73285	0.0392382
sp|Q9Y6M5|ZNT1_HUMAN	SLC30A1	Zinc transporter 1	1.71025	1.73509e-05
sp|Q9UPW6|SATB2_HUMAN	SATB2	DNA-binding protein SATB2	1.69946	0.0117863
sp|Q9BQI3|E2AK1_HUMAN	EIF2AK1	Eukaryotic translation initiation factor 2-alpha kinase 1	1.69299	7.36572e-06
sp|Q8WU67|ABHD3_HUMAN	ABHD3	Phospholipase ABHD3	1.67534	0.0342397
sp|O14763|TR10B_HUMAN	TNFRSF10B	Tumor necrosis factor receptor superfamily member 10B	1.64523	4.21257e-06
sp|P31431|SDC4_HUMAN	SDC4	Syndecan-4	1.63889	0.0246628
sp|O15533-3|TPSN_HUMAN	TAPBP	Isoform 3 of Tapasin	1.63794	0.0134814
sp|P08962|CD63_HUMAN	CD63	CD63 antigen	1.63384	1.48225e-05
sp|Q9H6T0-2|ESRP2_HUMAN	ESRP2	Isoform 2 of Epithelial splicing regulatory protein 2	1.60955	0.0496549
sp|Q14534|ERG1_HUMAN	SQLE	Squalene monooxygenase	1.5816	9.40536e-05
sp|P46782|RS5_HUMAN	RPS5	40S ribosomal protein S5	1.57233	2.85944e-05
sp|Q53FV1|ORML2_HUMAN	ORMDL2	ORM1-like protein 2	1.56675	0.000509915
sp|P09601|HMOX1_HUMAN	HMOX1	Heme oxygenase 1	1.56655	0.00853526
sp|Q9NWH2|TM242_HUMAN	TMEM242	Transmembrane protein 242	1.55315	0.00119699
sp|Q53GL0|PKHO1_HUMAN	PLEKHO1	Pleckstrin homology domain-containing family O member 1	1.53461	6.55758e-06
sp|P00742|FA10_HUMAN	F10	Coagulation factor X	1.52605	0.000159219
sp|A6NK97-2|S22AK_HUMAN	SLC22A20P	Isoform 2 of Solute carrier family 22 member 20	1.52386	0.0127238
sp|Q9BRK3-2|MXRA8_HUMAN	MXRA8	Isoform 2 of Matrix remodeling-associated protein 8	1.52236	0.0226586
sp|P18124|RL7_HUMAN	RPL7	60S ribosomal protein L7	1.52005	1.15796e-06
sp|Q96JQ0|PCD16_HUMAN	DCHS1	Protocadherin-16	1.51433	0.000474683
sp|Q86SQ4-3|AGRG6_HUMAN	ADGRG6	Isoform 3 of Adhesion G-protein coupled receptor G6	1.50009	0.0297111
sp|P17081|RHOQ_HUMAN	RHOQ	Rho-related GTP-binding protein RhoQ	1.49773	0.000570977
sp|Q86WK9|PAQR7_HUMAN	PAQR7	Membrane progestin receptor alpha	1.49595	0.000713521
sp|Q6UUV7|CRTC3_HUMAN	CRTC3	CREB-regulated transcription coactivator 3	1.49318	0.0169084
sp|Q9H2F3|3BHS7_HUMAN	HSD3B7	3 beta-hydroxysteroid dehydrogenase type 7	1.49162	0.0474674
sp|Q9UI14|PRAF1_HUMAN	RABAC1	Prenylated Rab acceptor protein 1	1.48392	8.78226e-05
sp|O95832|CLD1_HUMAN	CLDN1	Claudin-1	1.46576	0.00371258
sp|Q6ZTU2-6|E400N_HUMAN	EP400P1	Isoform 5 of Putative EP400-like protein	1.46244	0.0296351
sp|P02511|CRYAB_HUMAN	CRYAB	Alpha-crystallin B chain	1.45799	0.00572083
sp|P53801|PTTG_HUMAN	PTTG1IP	Pituitary tumor-transforming gene 1 protein-interacting protein	1.45533	0.000298587
sp|Q6N021|TET2_HUMAN	TET2	Methylcytosine dioxygenase TET2	1.45183	0.000200321
sp|Q8TCD1|CR032_HUMAN	C18orf32	UPF0729 protein C18orf32	1.44749	3.94555e-05
sp|O00712-4|NFIB_HUMAN	NFIB	Isoform 4 of Nuclear factor 1 B-type	1.44222	7.39935e-05
sp|O00559-2|RCAS1_HUMAN	EBAG9	Isoform 2 of Receptor-binding cancer antigen expressed on SiSo cells	1.43981	0.0153054
sp|Q8N1Q1|CAH13_HUMAN	CA13	Carbonic anhydrase 13	1.43934	0.0210775
sp|Q9BX73|TM2D2_HUMAN	TM2D2	TM2 domain-containing protein 2	1.4384	0.00299971
sp|O95402|MED26_HUMAN	MED26	Mediator of RNA polymerase II transcription subunit 26	1.43332	0.0223912
sp|P02774-3|VTDB_HUMAN	GC	Isoform 3 of Vitamin D-binding protein	1.43047	0.00473458
sp|Q9BT67|NFIP1_HUMAN	NDFIP1	NEDD4 family-interacting protein 1	1.41767	0.00145885
sp|Q9Y2Y6|TMM98_HUMAN	TMEM98	Transmembrane protein 98	1.41677	0.000180877
sp|Q9NV64|TM39A_HUMAN	TMEM39A	Transmembrane protein 39A	1.41588	0.00974877
sp|Q86W74|ANR46_HUMAN	ANKRD46	Ankyrin repeat domain-containing protein 46	1.4158	0.00358595
sp|Q8NEJ9|NGDN_HUMAN	NGDN	Neuroguidin	1.4121	9.40014e-05
sp|P10643|CO7_HUMAN	C7	Complement component C7	1.40885	1.71981e-06
sp|Q9BSY9|DESI2_HUMAN	DESI2	Deubiquitinase DESI2	1.39794	2.56113e-05
sp|P80365|DHI2_HUMAN	HSD11B2	Corticosteroid 11-beta-dehydrogenase isozyme 2	1.39721	0.0486146
sp|Q9Y385|UB2J1_HUMAN	UBE2J1	Ubiquitin-conjugating enzyme E2 J1	1.38856	0.000531932
sp|Q9BY50|SC11C_HUMAN	SEC11C	Signal peptidase complex catalytic subunit SEC11C	1.38816	0.00714303
sp|Q8NC42|RN149_HUMAN	RNF149	E3 ubiquitin-protein ligase RNF149	1.3877	0.000296556
sp|Q14135-4|VGLL4_HUMAN	VGLL4	Isoform 4 of Transcription cofactor vestigial-like protein 4	1.3871	0.0156395
sp|P15907|SIAT1_HUMAN	ST6GAL1	Beta-galactoside alpha-2,6-sialyltransferase 1	1.3728	0.03479
sp|Q9BUZ4|TRAF4_HUMAN	TRAF4	TNF receptor-associated factor 4	1.3689	0.0220562
sp|P02794|FRIH_HUMAN	FTH1	Ferritin heavy chain	1.36388	1.09751e-06
sp|Q6EEV4|GL1AD_HUMAN	POLR2M	DNA-directed RNA polymerase II subunit GRINL1A, isoforms 4/5	1.36115	0.000426526
sp|Q9P0B6|CC167_HUMAN	CCDC167	Coiled-coil domain-containing protein 167	1.35782	6.1646e-05
sp|Q9UPG8|PLAL2_HUMAN	PLAGL2	Zinc finger protein PLAGL2	1.35672	0.0338583
sp|Q16760|DGKD_HUMAN	DGKD	Diacylglycerol kinase delta	1.35479	0.00203707
sp|O95562|SFT2B_HUMAN	SFT2D2	Vesicle transport protein SFT2B	1.35112	3.07843e-05
sp|O75462|CRLF1_HUMAN	CRLF1	Cytokine receptor-like factor 1	1.34322	0.0172469
sp|Q96BI1|S22AI_HUMAN	SLC22A18	Solute carrier family 22 member 18	1.34242	0.0175809
sp|Q96E16|SMI19_HUMAN	SMIM19	Small integral membrane protein 19	1.34123	0.0122553
sp|Q9NPF0|CD320_HUMAN	CD320	CD320 antigen	1.33767	0.00514727
sp|P55082|MFAP3_HUMAN	MFAP3	Microfibril-associated glycoprotein 3	1.3366	7.74101e-05
sp|Q5VU97|CAHD1_HUMAN	CACHD1	VWFA and cache domain-containing protein 1	1.33284	0.00013954
sp|Q9Y328|NSG2_HUMAN	NSG2	Neuronal vesicle trafficking-associated protein 2	1.33207	0.00125428
tr|J3KQL8|J3KQL8_HUMAN	APOL2	Apolipoprotein L2	1.33165	0.00403679
sp|Q9NX76|CKLF6_HUMAN	CMTM6	CKLF-like MARVEL transmembrane domain-containing protein 6	1.32863	0.000726402
sp|P52799|EFNB2_HUMAN	EFNB2	Ephrin-B2	1.32846	0.00115675
sp|P08572|CO4A2_HUMAN	COL4A2	Collagen alpha-2(IV) chain	1.3252	0.0190958
sp|P23458|JAK1_HUMAN	JAK1	Tyrosine-protein kinase JAK1	1.32338	6.47737e-05
sp|Q03518|TAP1_HUMAN	TAP1	Antigen peptide transporter 1	1.32248	0.0113697
sp|Q9NS93|TM7S3_HUMAN	TM7SF3	Transmembrane 7 superfamily member 3	1.32004	0.0377722
sp|Q15040|JOS1_HUMAN	JOSD1	Josephin-1	1.31869	0.0370162
sp|Q86TG7-2|PEG10_HUMAN	PEG10	Isoform 2 of Retrotransposon-derived protein PEG10	1.31796	0.00229404
sp|P07225|PROS_HUMAN	PROS1	Vitamin K-dependent protein S	1.31791	0.000990849
sp|P11166|GTR1_HUMAN	SLC2A1	Solute carrier family 2, facilitated glucose transporter member 1	1.31701	0.0265402
sp|Q8NBZ7-2|UXS1_HUMAN	UXS1	Isoform 2 of UDP-glucuronic acid decarboxylase 1	1.31519	0.00266453
sp|Q96A72|MGN2_HUMAN	MAGOHB	Protein mago nashi homolog 2	1.30873	7.23522e-06
sp|P62805|H4_HUMAN	H4C1	Histone H4	1.30731	1.47181e-06
sp|P69849|NOMO3_HUMAN	NOMO3	Nodal modulator 3	1.30456	2.33181e-05
sp|P60468|SC61B_HUMAN	SEC61B	Protein transport protein Sec61 subunit beta	1.30424	3.57766e-05
sp|Q8WTV0|SCRB1_HUMAN	SCARB1	Scavenger receptor class B member 1	1.3037	0.0269325
sp|O14791-2|APOL1_HUMAN	APOL1	Isoform 2 of Apolipoprotein L1	1.3033	0.0147714
sp|Q9BT88|SYT11_HUMAN	SYT11	Synaptotagmin-11	1.303	7.61522e-05
sp|P05067|A4_HUMAN	APP	Amyloid-beta precursor protein	1.30173	2.04868e-05
sp|O94956|SO2B1_HUMAN	SLCO2B1	Solute carrier organic anion transporter family member 2B1	1.30105	0.00194773
sp|Q13501|SQSTM_HUMAN	SQSTM1	Sequestosome-1	1.30068	0.000158678
sp|A6NCS6|CB072_HUMAN	C2orf72	Uncharacterized protein C2orf72	1.29689	0.00204006
sp|Q9UN70|PCDGK_HUMAN	PCDHGC3	Protocadherin gamma-C3	1.2968	0.0251959
sp|Q8IY22|CMIP_HUMAN	CMIP	C-Maf-inducing protein	1.29466	0.00100396
sp|P19174|PLCG1_HUMAN	PLCG1	1-phosphatidylinositol 4,5-bisphosphate phosphodiesterase gamma-1	1.29454	0.0424888
sp|P09105|HBAT_HUMAN	HBQ1	Hemoglobin subunit theta-1	1.29252	0.0406131
sp|P10412|H14_HUMAN	H1-4	Histone H1.4	1.29066	0.00272278
sp|P58335|ANTR2_HUMAN	ANTXR2	Anthrax toxin receptor 2	1.2894	1.12831e-05
sp|Q53EZ4|CEP55_HUMAN	CEP55	Centrosomal protein of 55 kDa	1.28841	4.04626e-05
sp|Q9Y227|ENTP4_HUMAN	ENTPD4	Ectonucleoside triphosphate diphosphohydrolase 4	1.28656	0.00492518
sp|O43490|PROM1_HUMAN	PROM1	Prominin-1	1.28178	0.0195871
sp|Q9BVT8|TMUB1_HUMAN	TMUB1	Transmembrane and ubiquitin-like domain-containing protein 1	1.28112	0.00136646
sp|Q9NYL4|FKB11_HUMAN	FKBP11	Peptidyl-prolyl cis-trans isomerase FKBP11	1.28108	0.000316494
sp|Q5VST6|AB17B_HUMAN	ABHD17B	Alpha/beta hydrolase domain-containing protein 17B	1.28089	0.00191081
sp|Q92508|PIEZ1_HUMAN	PIEZO1	Piezo-type mechanosensitive ion channel component 1	1.2802	0.047263
sp|P27824-2|CALX_HUMAN	CANX	Isoform 2 of Calnexin	1.27975	2.84926e-05
sp|P61619|S61A1_HUMAN	SEC61A1	Protein transport protein Sec61 subunit alpha isoform 1	1.27974	3.46715e-05
sp|Q9Y2E8-2|SL9A8_HUMAN	SLC9A8	Isoform 2 of Sodium/hydrogen exchanger 8	1.27821	0.00191684
sp|Q9UK76|JUPI1_HUMAN	JPT1	Jupiter microtubule associated homolog 1	1.27789	5.69126e-06
sp|P21246|PTN_HUMAN	PTN	Pleiotrophin	1.27712	2.75809e-05
sp|O75635|SPB7_HUMAN	SERPINB7	Serpin B7	1.27387	0.000888287
sp|Q9UBQ6|EXTL2_HUMAN	EXTL2	Exostosin-like 2	1.27229	0.000183817
sp|Q86XX4-2|FRAS1_HUMAN	FRAS1	Isoform 2 of Extracellular matrix protein FRAS1	1.27131	0.00343806
sp|P36406|TRI23_HUMAN	TRIM23	E3 ubiquitin-protein ligase TRIM23	1.27107	0.0197782
sp|A8MTT3|CEBOS_HUMAN	CEBPZOS	Protein CEBPZOS	1.27012	0.00104383
sp|Q9NRP0|OSTC_HUMAN	OSTC	Oligosaccharyltransferase complex subunit OSTC	1.26891	0.00172602
sp|O60858-3|TRI13_HUMAN	TRIM13	Isoform 3 of E3 ubiquitin-protein ligase TRIM13	1.26642	6.55854e-06
sp|O43768-3|ENSA_HUMAN	ENSA	Isoform 3 of Alpha-endosulfine	1.26608	5.16527e-05
sp|Q8NCR0|B3GL2_HUMAN	B3GALNT2	UDP-GalNAc:beta-1,3-N-acetylgalactosaminyltransferase 2	1.2658	0.0489888
sp|P61254|RL26_HUMAN	RPL26	60S ribosomal protein L26	1.26557	0.00247168
sp|Q99442|SEC62_HUMAN	SEC62	Translocation protein SEC62	1.26496	2.69938e-05
sp|A0A096LP01|SIM26_HUMAN	SMIM26	Small integral membrane protein 26	1.26483	0.0106293
sp|Q96D05-2|F241B_HUMAN	FAM241B	Isoform 2 of Protein FAM241B	1.26447	2.24755e-06
sp|Q9UBU6|FA8A1_HUMAN	FAM8A1	Protein FAM8A1	1.26417	0.000356903
sp|Q96AG4|LRC59_HUMAN	LRRC59	Leucine-rich repeat-containing protein 59	1.2621	1.97542e-06
sp|Q9Y324|FCF1_HUMAN	FCF1	rRNA-processing protein FCF1 homolog	1.26016	0.000300781
sp|Q6NUQ4|TM214_HUMAN	TMEM214	Transmembrane protein 214	1.26008	0.00152292
sp|O75882|ATRN_HUMAN	ATRN	Attractin	1.25995	2.57823e-06
sp|P98153|IDD_HUMAN	DGCR2	Integral membrane protein DGCR2/IDD	1.25759	0.0134786
tr|H7BYZ2|H7BYZ2_HUMAN	ACSM6	Acyl-coenzyme A synthetase ACSM6, mitochondrial	1.25731	0.00598873
sp|Q53TN4|CYBR1_HUMAN	CYBRD1	Cytochrome b reductase 1	1.25607	0.0338733
sp|P05412|JUN_HUMAN	JUN	Transcription factor AP-1	1.25221	0.000768396
sp|Q9BVK8|TM147_HUMAN	TMEM147	Transmembrane protein 147	1.25083	0.000255893
sp|Q96EX1|SIM12_HUMAN	SMIM12	Small integral membrane protein 12	1.25	0.00558231
sp|Q96CP2|FWCH2_HUMAN	FLYWCH2	FLYWCH family member 2	1.24979	0.000392775
sp|Q5BKY9|F133B_HUMAN	FAM133B	Protein FAM133B	1.24936	0.0249054
sp|Q8WVX9|FACR1_HUMAN	FAR1	Fatty acyl-CoA reductase 1	1.24868	1.67673e-05
sp|O96005|CLPT1_HUMAN	CLPTM1	Cleft lip and palate transmembrane protein 1	1.24763	2.73611e-05
sp|Q8IUX7|AEBP1_HUMAN	AEBP1	Adipocyte enhancer-binding protein 1	1.24761	0.0174705
sp|Q9H6A9|PCX3_HUMAN	PCNX3	Pecanex-like protein 3	1.24715	0.0150884
sp|Q9Y5M8|SRPRB_HUMAN	SRPRB	Signal recognition particle receptor subunit beta	1.24679	4.85952e-05
sp|Q9Y287|ITM2B_HUMAN	ITM2B	Integral membrane protein 2B	1.24658	0.00152463
sp|Q9H6Y7|RN167_HUMAN	RNF167	E3 ubiquitin-protein ligase RNF167	1.2461	0.00192285
sp|Q07820|MCL1_HUMAN	MCL1	Induced myeloid leukemia cell differentiation protein Mcl-1	1.24529	0.00125955
sp|P41440|S19A1_HUMAN	SLC19A1	Reduced folate transporter	1.24504	0.00155565
sp|P38571|LICH_HUMAN	LIPA	Lysosomal acid lipase/cholesteryl ester hydrolase	1.24308	0.0208033
sp|Q8WW12|PCNP_HUMAN	PCNP	PEST proteolytic signal-containing nuclear protein	1.2429	1.76369e-05
sp|P48723|HSP13_HUMAN	HSPA13	Heat shock 70 kDa protein 13	1.24093	4.50611e-05
sp|O94955|RHBT3_HUMAN	RHOBTB3	Rho-related BTB domain-containing protein 3	1.24076	0.000512695
sp|P53567|CEBPG_HUMAN	CEBPG	CCAAT/enhancer-binding protein gamma	1.23942	0.000904859
sp|Q15629|TRAM1_HUMAN	TRAM1	Translocating chain-associated membrane protein 1	1.23779	0.0111004
sp|Q96I45|TM141_HUMAN	TMEM141	Transmembrane protein 141	1.23765	0.0164089
sp|P40429|RL13A_HUMAN	RPL13A	60S ribosomal protein L13a	1.23751	5.41565e-05
sp|Q969V3|NCLN_HUMAN	NCLN	Nicalin	1.23745	2.08083e-05
sp|P07108-5|ACBP_HUMAN	DBI	Isoform 5 of Acyl-CoA-binding protein	1.2362	0.00497737
sp|P46781|RS9_HUMAN	RPS9	40S ribosomal protein S9	1.23601	0.000116809
sp|Q96JE9|MAP6_HUMAN	MAP6	Microtubule-associated protein 6	1.23576	0.00568649
sp|P12109|CO6A1_HUMAN	COL6A1	Collagen alpha-1(VI) chain	1.2357	0.000117209
sp|Q9NQG1|MANBL_HUMAN	MANBAL	Protein MANBAL	1.23497	0.00341459
sp|Q8NBJ4|GOLM1_HUMAN	GOLM1	Golgi membrane protein 1	1.2346	4.24071e-06
sp|Q8NB50|ZFP62_HUMAN	ZFP62	Zinc finger protein 62 homolog	1.23371	0.0336858
sp|Q99758|ABCA3_HUMAN	ABCA3	ATP-binding cassette sub-family A member 3	1.23364	0.000247143
sp|O00220|TR10A_HUMAN	TNFRSF10A	Tumor necrosis factor receptor superfamily member 10A	1.23322	0.0126125
sp|P11388-4|TOP2A_HUMAN	TOP2A	Isoform 4 of DNA topoisomerase 2-alpha	1.2332	4.52538e-05
sp|Q9Y4U1|MMAC_HUMAN	MMACHC	Methylmalonic aciduria and homocystinuria type C protein	1.23306	0.00442206
sp|O60931-2|CTNS_HUMAN	CTNS	Isoform 2 of Cystinosin	1.23171	0.0445037
sp|P29966|MARCS_HUMAN	MARCKS	Myristoylated alanine-rich C-kinase substrate	1.23168	7.3401e-05
sp|P43307|SSRA_HUMAN	SSR1	Translocon-associated protein subunit alpha	1.23106	0.00066612
sp|A1KXE4|F168B_HUMAN	FAM168B	Myelin-associated neurite-outgrowth inhibitor	1.2302	0.00900781
sp|P38936|CDN1A_HUMAN	CDKN1A	Cyclin-dependent kinase inhibitor 1	1.22979	0.00781944
sp|Q8N6S5|AR6P6_HUMAN	ARL6IP6	ADP-ribosylation factor-like protein 6-interacting protein 6	1.22908	0.000545802
sp|Q16563|SYPL1_HUMAN	SYPL1	Synaptophysin-like protein 1	1.22802	0.0107622
sp|Q9H7F4|T185B_HUMAN	TMEM185B	Transmembrane protein 185B	1.22722	0.0038847
sp|Q9NZ01|TECR_HUMAN	TECR	Very-long-chain enoyl-CoA reductase	1.22709	3.39205e-06
sp|Q6DKI1|RL7L_HUMAN	RPL7L1	60S ribosomal protein L7-like 1	1.22627	0.000157652
sp|Q12965|MYO1E_HUMAN	MYO1E	Unconventional myosin-Ie	1.22624	0.0489769
sp|Q8TBA6|GOGA5_HUMAN	GOLGA5	Golgin subfamily A member 5	1.22623	4.7385e-06
sp|P41134|ID1_HUMAN	ID1	DNA-binding protein inhibitor ID-1	1.22612	4.20016e-05
sp|P16435|NCPR_HUMAN	POR	NADPH--cytochrome P450 reductase	1.22603	0.0108404
sp|Q70UQ0|IKIP_HUMAN	IKBIP	Inhibitor of nuclear factor kappa-B kinase-interacting protein	1.22564	0.00274518
sp|O00468|AGRIN_HUMAN	AGRN	Agrin	1.22495	0.0109339
sp|Q9BYG3|MK67I_HUMAN	NIFK	MKI67 FHA domain-interacting nucleolar phosphoprotein	1.22378	4.61143e-05
sp|Q9NR31|SAR1A_HUMAN	SAR1A	GTP-binding protein SAR1a	1.22374	0.000874322
sp|Q9UBR5|CKLF_HUMAN	CKLF	Chemokine-like factor	1.22371	0.0397194
sp|O14810|CPLX1_HUMAN	CPLX1	Complexin-1	1.22321	0.00812311
sp|Q6P444|MTFR2_HUMAN	MTFR2	Mitochondrial fission regulator 2	1.22211	0.0271921
sp|Q9UM21|MGT4A_HUMAN	MGAT4A	Alpha-1,3-mannosyl-glycoprotein 4-beta-N-acetylglucosaminyltransferase A	1.22173	0.0123214
sp|P80370|DLK1_HUMAN	DLK1	Protein delta homolog 1	1.22014	0.0415302
sp|Q13057-2|COASY_HUMAN	COASY	Isoform 2 of Bifunctional coenzyme A synthase	1.21815	0.00127409
sp|Q70SY1|CR3L2_HUMAN	CREB3L2	Cyclic AMP-responsive element-binding protein 3-like protein 2	1.21699	0.0444046
sp|Q8TAA9|VANG1_HUMAN	VANGL1	Vang-like protein 1	1.21681	0.039939
sp|Q5BJD5|TM41B_HUMAN	TMEM41B	Transmembrane protein 41B	1.2168	0.0173573
sp|P17707|DCAM_HUMAN	AMD1	S-adenosylmethionine decarboxylase proenzyme	1.21662	0.0228971
sp|P63218|GBG5_HUMAN	GNG5	Guanine nucleotide-binding protein G(I)/G(S)/G(O) subunit gamma-5	1.21594	0.000431478
sp|Q8N448|LNX2_HUMAN	LNX2	Ligand of Numb protein X 2	1.21493	0.00160867
sp|Q12882|DPYD_HUMAN	DPYD	Dihydropyrimidine dehydrogenase [NADP(+)]	1.21431	0.00956568
sp|Q8N5M4|TTC9C_HUMAN	TTC9C	Tetratricopeptide repeat protein 9C	1.21393	0.000416585
sp|Q96LJ7|DHRS1_HUMAN	DHRS1	Dehydrogenase/reductase SDR family member 1	1.21353	0.0410327
sp|Q6P4F7|RHGBA_HUMAN	ARHGAP11A	Rho GTPase-activating protein 11A	1.21295	0.00939376
sp|Q9NXW2|DJB12_HUMAN	DNAJB12	DnaJ homolog subfamily B member 12	1.21123	0.000563556
sp|P51572-2|BAP31_HUMAN	BCAP31	Isoform 2 of B-cell receptor-associated protein 31	1.20982	2.26892e-07
tr|A0A0A0MRW3|A0A0A0MRW3_HUMAN	FAM219A	Protein FAM219A	1.20896	0.00951461
sp|Q15800|MSMO1_HUMAN	MSMO1	Methylsterol monooxygenase 1	1.20891	0.0147434
sp|Q9GZX9|TWSG1_HUMAN	TWSG1	Twisted gastrulation protein homolog 1	1.20864	0.0435721
sp|P53794|SC5A3_HUMAN	SLC5A3	Sodium/myo-inositol cotransporter	1.2081	0.0125278
sp|P56730|NETR_HUMAN	PRSS12	Neurotrypsin	1.20756	3.21684e-06
sp|Q9Y255|PRLD1_HUMAN	PRELID1	PRELI domain-containing protein 1, mitochondrial	1.20672	0.0498964
sp|Q8N565-2|MREG_HUMAN	MREG	Isoform 2 of Melanoregulin	1.2063	0.0287733
sp|Q9H6X2|ANTR1_HUMAN	ANTXR1	Anthrax toxin receptor 1	1.20605	0.000867446
sp|Q96HE9|PRR11_HUMAN	PRR11	Proline-rich protein 11	1.20571	5.14346e-05
sp|P60900|PSA6_HUMAN	PSMA6	Proteasome subunit alpha type-6	1.20531	8.76504e-06
sp|Q6UW56-3|ARAID_HUMAN	ATRAID	Isoform 3 of All-trans retinoic acid-induced differentiation factor	1.20464	0.0261191
sp|Q96A33|CCD47_HUMAN	CCDC47	Coiled-coil domain-containing protein 47	1.20439	1.7167e-05
sp|Q9NW13|RBM28_HUMAN	RBM28	RNA-binding protein 28	1.20194	9.82582e-06
sp|P56589|PEX3_HUMAN	PEX3	Peroxisomal biogenesis factor 3	1.20131	0.0256742
sp|P00338-3|LDHA_HUMAN	LDHA	Isoform 3 of L-lactate dehydrogenase A chain	1.2011	0.00468742
sp|Q9Y4D1|DAAM1_HUMAN	DAAM1	Disheveled-associated activator of morphogenesis 1	1.20106	0.000737126
sp|P50443|S26A2_HUMAN	SLC26A2	Sulfate transporter	0.83225	6.1371e-05
sp|O43678|NDUA2_HUMAN	NDUFA2	NADH dehydrogenase [ubiquinone] 1 alpha subcomplex subunit 2	0.832092	0.0227567
sp|Q9NUS5|AP5S1_HUMAN	AP5S1	AP-5 complex subunit sigma-1	0.831883	0.0433928
sp|Q92932-3|PTPR2_HUMAN	PTPRN2	Isoform 3 of Receptor-type tyrosine-protein phosphatase N2	0.831393	0.0276675
sp|Q9UBC1|IKBL1_HUMAN	NFKBIL1	NF-kappa-B inhibitor-like protein 1	0.83105	0.0204194
sp|Q5T2R2|DPS1_HUMAN	PDSS1	Decaprenyl-diphosphate synthase subunit 1	0.830823	6.3243e-05
sp|O75380|NDUS6_HUMAN	NDUFS6	NADH dehydrogenase [ubiquinone] iron-sulfur protein 6, mitochondrial	0.8301	0.000138099
sp|P49821|NDUV1_HUMAN	NDUFV1	NADH dehydrogenase [ubiquinone] flavoprotein 1, mitochondrial	0.829596	0.000163165
sp|P04629|NTRK1_HUMAN	NTRK1	High affinity nerve growth factor receptor	0.82802	0.00182852
sp|Q9BTT4|MED10_HUMAN	MED10	Mediator of RNA polymerase II transcription subunit 10	0.827651	0.000519539
sp|Q6ZRI8|RHG36_HUMAN	ARHGAP36	Rho GTPase-activating protein 36	0.827154	4.99489e-05
sp|Q9UQ53-3|MGT4B_HUMAN	MGAT4B	Isoform 3 of Alpha-1,3-mannosyl-glycoprotein 4-beta-N-acetylglucosaminyltransferase B	0.826025	0.0203369
sp|P55058|PLTP_HUMAN	PLTP	Phospholipid transfer protein	0.824551	0.0214343
sp|Q9BZ67|FRMD8_HUMAN	FRMD8	FERM domain-containing protein 8	0.823946	0.00124625
sp|O00507|USP9Y_HUMAN	USP9Y	Probable ubiquitin carboxyl-terminal hydrolase FAF-Y	0.82235	0.000404338
sp|O95169|NDUB8_HUMAN	NDUFB8	NADH dehydrogenase [ubiquinone] 1 beta subcomplex subunit 8, mitochondrial	0.822301	0.00121816
sp|O60220|TIM8A_HUMAN	TIMM8A	Mitochondrial import inner membrane translocase subunit Tim8 A	0.821162	0.00918387
sp|Q8WV60|PTCD2_HUMAN	PTCD2	Pentatricopeptide repeat-containing protein 2, mitochondrial	0.821142	0.00438812
sp|Q9Y3Q0|NALD2_HUMAN	NAALAD2	N-acetylated-alpha-linked acidic dipeptidase 2	0.820462	0.00974454
sp|Q6ZQQ2|S31D1_HUMAN	SPATA31D1	Spermatogenesis-associated protein 31D1	0.819891	0.000361142
sp|Q15369|ELOC_HUMAN	ELOC	Elongin-C	0.819554	1.04768e-05
sp|P56556|NDUA6_HUMAN	NDUFA6	NADH dehydrogenase [ubiquinone] 1 alpha subcomplex subunit 6	0.819442	2.29305e-05
sp|Q7Z7L8|CK096_HUMAN	C11orf96	Uncharacterized protein C11orf96	0.818702	4.20449e-05
sp|O43181|NDUS4_HUMAN	NDUFS4	NADH dehydrogenase [ubiquinone] iron-sulfur protein 4, mitochondrial	0.818567	0.000186713
sp|P28065|PSB9_HUMAN	PSMB9	Proteasome subunit beta type-9	0.817407	0.00079627
sp|Q96FH0|BORC8_HUMAN	BORCS8	BLOC-1-related complex subunit 8	0.816748	0.000163523
sp|Q9BZ72|PITM2_HUMAN	PITPNM2	Membrane-associated phosphatidylinositol transfer protein 2	0.813011	0.0399751
sp|O60361|NDK8_HUMAN	NME2P1	Putative nucleoside diphosphate kinase	0.812848	0.00582321
sp|Q99417|MYCBP_HUMAN	MYCBP	c-Myc-binding protein	0.811634	0.00109742
sp|Q9HB09|B2L12_HUMAN	BCL2L12	Bcl-2-like protein 12	0.810636	0.028925
sp|O95258-3|UCP5_HUMAN	SLC25A14	Isoform 3 of Brain mitochondrial carrier protein 1	0.809123	0.022561
sp|O14529|CUX2_HUMAN	CUX2	Homeobox protein cut-like 2	0.80902	7.82888e-05
sp|Q6NSJ0|MYORG_HUMAN	MYORG	Myogenesis-regulating glycosidase	0.8075	0.00885323
sp|Q13449|LSAMP_HUMAN	LSAMP	Limbic system-associated membrane protein	0.806808	0.000727961
sp|Q8IY31-2|IFT20_HUMAN	IFT20	Isoform 2 of Intraflagellar transport protein 20 homolog	0.805801	0.00214581
sp|Q8IXM3|RM41_HUMAN	MRPL41	39S ribosomal protein L41, mitochondrial	0.804084	3.56482e-06
sp|Q9BX79-4|STRA6_HUMAN	STRA6	Isoform 4 of Receptor for retinol uptake STRA6	0.803503	7.80713e-05
sp|Q8NBJ9-2|SIDT2_HUMAN	SIDT2	Isoform 2 of SID1 transmembrane family member 2	0.803167	0.0166849
sp|Q99757|THIOM_HUMAN	TXN2	Thioredoxin, mitochondrial	0.803095	1.23961e-05
sp|Q9NWU2|GID8_HUMAN	GID8	Glucose-induced degradation protein 8 homolog	0.802781	8.32463e-06
sp|Q14849-3|STAR3_HUMAN	STARD3	Isoform 3 of StAR-related lipid transfer protein 3	0.802027	0.00940497
sp|Q9BWJ5|SF3B5_HUMAN	SF3B5	Splicing factor 3B subunit 5	0.801173	0.000383038
sp|Q9P2F9|ZN319_HUMAN	ZNF319	Zinc finger protein 319	0.800937	0.000109162
sp|Q9P0R6|GSKIP_HUMAN	GSKIP	GSK3B-interacting protein	0.80034	0.0170841
sp|Q75T13|PGAP1_HUMAN	PGAP1	GPI inositol-deacylase	0.800332	0.00040834
sp|Q9UI09|NDUAC_HUMAN	NDUFA12	NADH dehydrogenase [ubiquinone] 1 alpha subcomplex subunit 12	0.80022	1.30155e-05
sp|Q96GJ1|TRM2_HUMAN	TRMT2B	tRNA (uracil(54)-C(5))-methyltransferase homolog	0.800144	0.00924898
sp|O43405|COCH_HUMAN	COCH	Cochlin	0.79969	0.000127966
sp|Q9Y4Y9|LSM5_HUMAN	LSM5	U6 snRNA-associated Sm-like protein LSm5	0.799139	0.000268003
sp|Q3MIN7-2|RGL3_HUMAN	RGL3	Isoform 2 of Ral guanine nucleotide dissociation stimulator-like 3	0.798369	0.0204368
sp|Q8NC54|KCT2_HUMAN	KCT2	Keratinocyte-associated transmembrane protein 2	0.798268	0.000359115
sp|Q6Q788|APOA5_HUMAN	APOA5	Apolipoprotein A-V	0.795841	0.00269099
sp|Q96KC8|DNJC1_HUMAN	DNAJC1	DnaJ homolog subfamily C member 1	0.792843	0.000265602
sp|O94907|DKK1_HUMAN	DKK1	Dickkopf-related protein 1	0.791715	0.000206401
sp|Q9UPR5|NAC2_HUMAN	SLC8A2	Sodium/calcium exchanger 2	0.791329	0.0220158
sp|Q8NBN3|TM87A_HUMAN	TMEM87A	Transmembrane protein 87A	0.785036	2.56597e-06
sp|Q96K49|TM87B_HUMAN	TMEM87B	Transmembrane protein 87B	0.784963	0.000555023
sp|Q96GX2|A7L3B_HUMAN	ATXN7L3B	Ataxin-7-like protein 3B	0.783045	0.00670832
sp|Q9P0N9|TBCD7_HUMAN	TBC1D7	TBC1 domain family member 7	0.782621	0.0320199
sp|P56181|NDUV3_HUMAN	NDUFV3	NADH dehydrogenase [ubiquinone] flavoprotein 3, mitochondrial	0.782212	0.00116494
sp|Q99538|LGMN_HUMAN	LGMN	Legumain	0.782187	0.000103592
sp|P22304|IDS_HUMAN	IDS	Iduronate 2-sulfatase	0.780534	0.0250968
sp|Q96JS3|PGBD1_HUMAN	PGBD1	PiggyBac transposable element-derived protein 1	0.779323	0.0393308
sp|Q9H7P9|PKHG2_HUMAN	PLEKHG2	Pleckstrin homology domain-containing family G member 2	0.778048	0.00197572
sp|P62875|RPAB5_HUMAN	POLR2L	DNA-directed RNA polymerases I, II, and III subunit RPABC5	0.776189	0.000107487
sp|P49810|PSN2_HUMAN	PSEN2	Presenilin-2	0.774551	0.0427794
sp|Q13387|JIP2_HUMAN	MAPK8IP2	C-Jun-amino-terminal kinase-interacting protein 2	0.774071	0.046707
sp|Q8TCZ2-5|C99L2_HUMAN	CD99L2	Isoform 5 of CD99 antigen-like protein 2	0.772573	0.00999963
sp|O95182|NDUA7_HUMAN	NDUFA7	NADH dehydrogenase [ubiquinone] 1 alpha subcomplex subunit 7	0.772549	2.95215e-06
sp|P62310|LSM3_HUMAN	LSM3	U6 snRNA-associated Sm-like protein LSm3	0.772082	0.000472148
sp|O15239|NDUA1_HUMAN	NDUFA1	NADH dehydrogenase [ubiquinone] 1 alpha subcomplex subunit 1	0.771167	0.0241625
sp|Q9NUE0|ZDH18_HUMAN	ZDHHC18	Palmitoyltransferase ZDHHC18	0.770075	0.00129324
sp|Q8WVP7-3|LMBR1_HUMAN	LMBR1	Isoform 3 of Limb region 1 protein homolog	0.768566	0.00432362
sp|P00403|COX2_HUMAN	MT-CO2	Cytochrome c oxidase subunit 2	0.767065	3.37887e-05
sp|P58546|MTPN_HUMAN	MTPN	Myotrophin	0.766507	7.4037e-06
sp|Q8N6N6|NATD1_HUMAN	NATD1	Protein NATD1	0.766169	0.00346804
sp|Q8WX77|IBPL1_HUMAN	IGFBPL1	Insulin-like growth factor-binding protein-like 1	0.76258	0.000211244
sp|C9JH25|PRRT4_HUMAN	PRRT4	Proline-rich transmembrane protein 4	0.759795	3.48756e-06
sp|Q86XT9|TM219_HUMAN	TMEM219	Insulin-like growth factor-binding protein 3 receptor	0.75902	0.00190091
sp|Q08AG7|MZT1_HUMAN	MZT1	Mitotic-spindle organizing protein 1	0.75864	0.0470864
sp|P79522|PRR3_HUMAN	PRR3	Proline-rich protein 3	0.755016	9.84631e-06
sp|Q9NQZ6|ZC4H2_HUMAN	ZC4H2	Zinc finger C4H2 domain-containing protein	0.750582	0.000179198
sp|Q9BRY0|S39A3_HUMAN	SLC39A3	Zinc transporter ZIP3	0.746343	0.000100509
sp|Q9H3M7|TXNIP_HUMAN	TXNIP	Thioredoxin-interacting protein	0.744503	0.00312911
sp|P10092|CALCB_HUMAN	CALCB	Calcitonin gene-related peptide 2	0.743761	0.00105758
sp|Q8IVP5|FUND1_HUMAN	FUNDC1	FUN14 domain-containing protein 1	0.743538	0.00028602
sp|O43934|MFS11_HUMAN	MFSD11	UNC93-like protein MFSD11	0.741268	0.000135373
sp|Q9Y5J9|TIM8B_HUMAN	TIMM8B	Mitochondrial import inner membrane translocase subunit Tim8 B	0.740382	0.00990238
sp|Q9ULF5|S39AA_HUMAN	SLC39A10	Zinc transporter ZIP10	0.739119	4.53897e-05
sp|Q8N3F0|MTURN_HUMAN	MTURN	Maturin	0.737079	0.020109
sp|P24593|IBP5_HUMAN	IGFBP5	Insulin-like growth factor-binding protein 5	0.735914	0.000128788
sp|Q96RW7|HMCN1_HUMAN	HMCN1	Hemicentin-1	0.733612	0.000344212
sp|Q969M1|TM40L_HUMAN	TOMM40L	Mitochondrial import receptor subunit TOM40B	0.733472	0.00544291
sp|P22692|IBP4_HUMAN	IGFBP4	Insulin-like growth factor-binding protein 4	0.73152	0.000618636
tr|A0A087WWZ6|A0A087WWZ6_HUMAN	PRDM11	PR domain-containing protein 11	0.729369	0.0146576
sp|Q9H336|CRLD1_HUMAN	CRISPLD1	Cysteine-rich secretory protein LCCL domain-containing 1	0.72734	1.23723e-05
sp|Q99519|NEUR1_HUMAN	NEU1	Sialidase-1	0.726994	0.00186548
sp|Q8TD57|DYH3_HUMAN	DNAH3	Dynein heavy chain 3, axonemal	0.725737	0.000113932
sp|P13521|SCG2_HUMAN	SCG2	Secretogranin-2	0.725617	1.5725e-06
sp|P14406|CX7A2_HUMAN	COX7A2	Cytochrome c oxidase subunit 7A2, mitochondrial	0.72279	1.90498e-05
sp|Q9BRT3|MIEN1_HUMAN	MIEN1	Migration and invasion enhancer 1	0.721961	0.00151647
sp|Q8ND83|SLAI1_HUMAN	SLAIN1	SLAIN motif-containing protein 1	0.719885	0.0351386
sp|O75173-2|ATS4_HUMAN	ADAMTS4	Isoform 2 of A disintegrin and metalloproteinase with thrombospondin motifs 4	0.719244	0.000533582
sp|P15954|COX7C_HUMAN	COX7C	Cytochrome c oxidase subunit 7C, mitochondrial	0.718137	3.06483e-05
sp|Q99622|C10_HUMAN	C12orf57	Protein C10	0.717998	5.54595e-05
sp|Q8N6N7|ACBD7_HUMAN	ACBD7	Acyl-CoA-binding domain-containing protein 7	0.717608	0.00209586
sp|P09488|GSTM1_HUMAN	GSTM1	Glutathione S-transferase Mu 1	0.709935	0.00185941
sp|Q9NQQ7-3|S35C2_HUMAN	SLC35C2	Isoform 3 of Solute carrier family 35 member C2	0.707027	0.0236207
sp|Q13015|AF1Q_HUMAN	MLLT11	Protein AF1q	0.702667	0.00193432
sp|Q8NG11|TSN14_HUMAN	TSPAN14	Tetraspanin-14	0.70184	8.83754e-05
sp|Q9UHI8|ATS1_HUMAN	ADAMTS1	A disintegrin and metalloproteinase with thrombospondin motifs 1	0.699318	5.34822e-05
sp|Q7Z2D5|PLPR4_HUMAN	PLPPR4	Phospholipid phosphatase-related protein type 4	0.699203	0.000304429
sp|O14867|BACH1_HUMAN	BACH1	Transcription regulator protein BACH1	0.69233	0.00470594
sp|P03897|NU3M_HUMAN	MT-ND3	NADH-ubiquinone oxidoreductase chain 3	0.691423	0.000142538
sp|P40855|PEX19_HUMAN	PEX19	Peroxisomal biogenesis factor 19	0.683465	2.32396e-05
sp|P19021-5|AMD_HUMAN	PAM	Isoform 5 of Peptidyl-glycine alpha-amidating monooxygenase	0.682729	3.32701e-05
sp|Q15678|PTN14_HUMAN	PTPN14	Tyrosine-protein phosphatase non-receptor type 14	0.680704	0.0138091
sp|O15240|VGF_HUMAN	VGF	Neurosecretory protein VGF	0.679636	1.19822e-05
sp|P51157|RAB28_HUMAN	RAB28	Ras-related protein Rab-28	0.675455	0.00518751
sp|P16870|CBPE_HUMAN	CPE	Carboxypeptidase E	0.673589	1.73704e-06
sp|Q56A73|SPIN4_HUMAN	SPIN4	Spindlin-4	0.659889	0.0282026
sp|Q96MC6|MF14A_HUMAN	MFSD14A	Hippocampus abundant transcript 1 protein	0.657835	0.00786013
sp|Q9P2D6|F135A_HUMAN	FAM135A	Protein FAM135A	0.645246	0.0189428
sp|Q9Y3A0|COQ4_HUMAN	COQ4	Ubiquinone biosynthesis protein COQ4 homolog, mitochondrial	0.64075	0.0120921
sp|P05060|SCG1_HUMAN	CHGB	Secretogranin-1	0.635155	2.15759e-07
sp|P57087-3|JAM2_HUMAN	JAM2	Isoform 3 of Junctional adhesion molecule B	0.631438	5.04183e-06
tr|A0A087WWI0|A0A087WWI0_HUMAN	LRMDA	Leucine-rich melanocyte differentiation-associated protein	0.626846	0.00243228
sp|P01282|VIP_HUMAN	VIP	VIP peptides	0.626346	2.55127e-05
sp|Q14831-2|GRM7_HUMAN	GRM7	Isoform 2 of Metabotropic glutamate receptor 7	0.614449	0.00632872
sp|Q12907|LMAN2_HUMAN	LMAN2	Vesicular integral-membrane protein VIP36	0.613933	2.54355e-06
sp|O14561|ACPM_HUMAN	NDUFAB1	Acyl carrier protein, mitochondrial	0.610194	8.06714e-05
sp|Q8WXD2|SCG3_HUMAN	SCG3	Secretogranin-3	0.602081	2.92015e-06
sp|Q9H2X8|I27L2_HUMAN	IFI27L2	Interferon alpha-inducible protein 27-like protein 2	0.601984	8.0884e-05
sp|P22466|GALA_HUMAN	GAL	Galanin peptides	0.597241	8.37431e-05
sp|P23975-2|SC6A2_HUMAN	SLC6A2	Isoform 2 of Sodium-dependent noradrenaline transporter	0.590831	0.000108356
sp|Q8NFZ5|TNIP2_HUMAN	TNIP2	TNFAIP3-interacting protein 2	0.58966	0.0240605
sp|O75976|CBPD_HUMAN	CPD	Carboxypeptidase D	0.589644	8.59224e-07
sp|Q9UBN1|CCG4_HUMAN	CACNG4	Voltage-dependent calcium channel gamma-4 subunit	0.578836	0.002581
sp|P01303|NPY_HUMAN	NPY	Pro-neuropeptide Y	0.573737	0.000143439
sp|Q8NBR0|P5I13_HUMAN	TP53I13	Tumor protein p53-inducible protein 13	0.572614	0.00222432
sp|O43493-7|TGON2_HUMAN	TGOLN2	Isoform 7 of Trans-Golgi network integral membrane protein 2	0.56977	1.56846e-06
sp|Q5VV42|CDKAL_HUMAN	CDKAL1	Threonylcarbamoyladenosine tRNA methylthiotransferase	0.567289	2.97084e-06
sp|Q9NQX5|NPDC1_HUMAN	NPDC1	Neural proliferation differentiation and control protein 1	0.566277	0.000167059
sp|P10645|CMGA_HUMAN	CHGA	Chromogranin-A	0.563175	5.99065e-05
sp|Q12999|TSN31_HUMAN	TSPAN31	Tetraspanin-31	0.544633	1.23176e-05
sp|Q9BTM9-2|URM1_HUMAN	URM1	Isoform 2 of Ubiquitin-related modifier 1	0.534656	0.00298931
sp|Q8TES7-6|FBF1_HUMAN	FBF1	Isoform 6 of Fas-binding factor 1	0.533762	0.033287
sp|Q86WW8|COA5_HUMAN	COA5	Cytochrome c oxidase assembly factor 5	0.515498	0.00019263
sp|P13196|HEM1_HUMAN	ALAS1	5-aminolevulinate synthase, nonspecific, mitochondrial	0.476455	2.93742e-05
sp|Q96GM1-2|PLPR2_HUMAN	PLPPR2	Isoform 2 of Phospholipid phosphatase-related protein type 2	0.458662	0.00956594
sp|O43462|MBTP2_HUMAN	MBTPS2	Membrane-bound transcription factor site-2 protease	0.448047	0.000118345
sp|O95857|TSN13_HUMAN	TSPAN13	Tetraspanin-13	0.399818	0.000181064
sp|Q9H8J5|MANS1_HUMAN	MANSC1	MANSC domain-containing protein 1	0.355197	6.71584e-06
sp|P25391|LAMA1_HUMAN	LAMA1	Laminin subunit alpha-1	0.344065	1.46584e-05
sp|Q5T9L3-2|WLS_HUMAN	WLS	Isoform 2 of Protein wntless homolog	0.332578	4.73551e-05
sp|Q9UBN6|TR10D_HUMAN	TNFRSF10D	Tumor necrosis factor receptor superfamily member 10D	0.0119348	0.0339979
